# Supplementary material for: Characteristics of T-cell receptor repertoire of stem cell-like memory CD4+ T cells
Source: PeerJ. 2021 Aug 25;9:e11987. doi: 10.7717/peerj.11987 (PMC8401816; doi:10.7717/peerj.11987)
Supplement: Supplemental Information 5 [file peerj-09-11987-s005.xlsx]

## Sheet: Gliph2_Tscm_top1000_public
index	pattern	Fisher_score	number_subject	number_unique_cdr3	final_score	hla_score	vb_score	expansion_score	length_score	cluster_size_score	type	TcRb	V	J	TcRa	Sample	Freq	HLA-A	HLA-B	HLA-C	HLA-DPA1	HLA-DPB1	HLA-DQA1	HLA-DQB1	HLA-DRB1	HLA-DRB3	HLA-DRB4	HLA-DRB5
1	S%TDT	8.6e-17	14	17	7.4e-09	1	0.078	1	0.001	9.5e-05	global-S%TDT	CASSETDTQYF	TCRBV02-01	TCRBJ02-03	NA	03/0903:HD3_Tscm	1	-	-	-	-	-	-	-	-	-	-	-
1	S%TDT	8.6e-17	14	17	7.4e-09	1	0.078	1	0.001	9.5e-05	global-S%TDT	CASSRTDTQYF	TCRBV02-01	TCRBJ02-03	NA	03/0906:HD6_Tscm	1	-	-	-	-	-	-	-	-	-	-	-
1	S%TDT	8.6e-17	14	17	7.4e-09	1	0.078	1	0.001	9.5e-05	global-S%TDT	CASSRTDTQYF	TCRBV28-01	TCRBJ02-03	NA	03/0906:HD6_Tscm	1	-	-	-	-	-	-	-	-	-	-	-
1	S%TDT	8.6e-17	14	17	7.4e-09	1	0.078	1	0.001	9.5e-05	global-S%TDT	CASSRTDTQYF	TCRBV06-06	TCRBJ02-03	NA	03/0906:HD6_Tscm	1	-	-	-	-	-	-	-	-	-	-	-
1	S%TDT	8.6e-17	14	17	7.4e-09	1	0.078	1	0.001	9.5e-05	global-S%TDT	CASSRTDTQYF	TCRBV18-01	TCRBJ02-03	NA	03/0906:HD6_Tscm	1	-	-	-	-	-	-	-	-	-	-	-
1	S%TDT	8.6e-17	14	17	7.4e-09	1	0.078	1	0.001	9.5e-05	global-S%TDT	CASSRTDTQYF	TCRBV07-09	TCRBJ02-03	NA	03/0906:HD6_Tscm	1	-	-	-	-	-	-	-	-	-	-	-
1	S%TDT	8.6e-17	14	17	7.4e-09	1	0.078	1	0.001	9.5e-05	global-S%TDT	CASSRTDTQYF	TCRBV07-09	TCRBJ02-03	NA	03/0910:T1D2_Tscm	1	-	-	-	-	-	-	-	-	-	-	-
1	S%TDT	8.6e-17	14	17	7.4e-09	1	0.078	1	0.001	9.5e-05	global-S%TDT	CASSRTDTQYF	TCRBV03-01	TCRBJ02-03	NA	03/0914:T1D6_Tscm	1	-	-	-	-	-	-	-	-	-	-	-
1	S%TDT	8.6e-17	14	17	7.4e-09	1	0.078	1	0.001	9.5e-05	global-S%TDT	CASSRTDTQYF	TCRBV12-03	TCRBJ02-03	NA	03/0915:T1D7_Tscm	1	-	-	-	-	-	-	-	-	-	-	-
1	S%TDT	8.6e-17	14	17	7.4e-09	1	0.078	1	0.001	9.5e-05	global-S%TDT	CASSRTDTQYF	TCRBV25-01	TCRBJ02-03	NA	03/0915:T1D7_Tscm	1	-	-	-	-	-	-	-	-	-	-	-
1	S%TDT	8.6e-17	14	17	7.4e-09	1	0.078	1	0.001	9.5e-05	global-S%TDT	CASSRTDTQYF	TCRBV07-09	TCRBJ02-03	NA	03/0915:T1D7_Tscm	1	-	-	-	-	-	-	-	-	-	-	-
1	S%TDT	8.6e-17	14	17	7.4e-09	1	0.078	1	0.001	9.5e-05	global-S%TDT	CASSRTDTQYF	TCRBV18-01	TCRBJ02-03	NA	03/0915:T1D7_Tscm	1	-	-	-	-	-	-	-	-	-	-	-
1	S%TDT	8.6e-17	14	17	7.4e-09	1	0.078	1	0.001	9.5e-05	global-S%TDT	CASSRTDTQYF	TCRBV06-06	TCRBJ02-03	NA	03/0916:T1D8_Tscm	1	-	-	-	-	-	-	-	-	-	-	-
1	S%TDT	8.6e-17	14	17	7.4e-09	1	0.078	1	0.001	9.5e-05	global-S%TDT	CASSRTDTQYF	TCRBV03-01	TCRBJ02-03	NA	03/0916:T1D8_Tscm	1	-	-	-	-	-	-	-	-	-	-	-
1	S%TDT	8.6e-17	14	17	7.4e-09	1	0.078	1	0.001	9.5e-05	global-S%TDT	CASSRTDTQYF	TCRBV07-09	TCRBJ02-03	NA	03/0916:T1D8_Tscm	1	-	-	-	-	-	-	-	-	-	-	-
1	S%TDT	8.6e-17	14	17	7.4e-09	1	0.078	1	0.001	9.5e-05	global-S%TDT	CASSDTDTQYF	TCRBV19-01	TCRBJ02-03	NA	03/0910:T1D2_Tscm	1	-	-	-	-	-	-	-	-	-	-	-
1	S%TDT	8.6e-17	14	17	7.4e-09	1	0.078	1	0.001	9.5e-05	global-S%TDT	CASSQTDTQYF	TCRBV03-01	TCRBJ02-03	NA	03/0912:T1D4_Tscm	1	-	-	-	-	-	-	-	-	-	-	-
1	S%TDT	8.6e-17	14	17	7.4e-09	1	0.078	1	0.001	9.5e-05	global-S%TDT	CASSQTDTQYF	TCRBV12-03	TCRBJ02-03	NA	03/0912:T1D4_Tscm	1	-	-	-	-	-	-	-	-	-	-	-
1	S%TDT	8.6e-17	14	17	7.4e-09	1	0.078	1	0.001	9.5e-05	global-S%TDT	CASSNTDTQYF	TCRBV12-03	TCRBJ02-03	NA	03/0902:HD2_Tscm	1	-	-	-	-	-	-	-	-	-	-	-
1	S%TDT	8.6e-17	14	17	7.4e-09	1	0.078	1	0.001	9.5e-05	global-S%TDT	CASSNTDTQYF	TCRBV14-01	TCRBJ02-03	NA	03/0902:HD2_Tscm	1	-	-	-	-	-	-	-	-	-	-	-
1	S%TDT	8.6e-17	14	17	7.4e-09	1	0.078	1	0.001	9.5e-05	global-S%TDT	CASSNTDTQYF	TCRBV05-04	TCRBJ02-03	NA	03/0902:HD2_Tscm	1	-	-	-	-	-	-	-	-	-	-	-
1	S%TDT	8.6e-17	14	17	7.4e-09	1	0.078	1	0.001	9.5e-05	global-S%TDT	CASSNTDTQYF	TCRBV04-01	TCRBJ02-03	NA	03/0905:HD5_Tscm	1	-	-	-	-	-	-	-	-	-	-	-
1	S%TDT	8.6e-17	14	17	7.4e-09	1	0.078	1	0.001	9.5e-05	global-S%TDT	CASSNTDTQYF	TCRBV07-03	TCRBJ02-03	NA	03/0905:HD5_Tscm	1	-	-	-	-	-	-	-	-	-	-	-
1	S%TDT	8.6e-17	14	17	7.4e-09	1	0.078	1	0.001	9.5e-05	global-S%TDT	CASSHTDTQYF	TCRBV06-02	TCRBJ02-03	NA	03/0902:HD2_Tscm	1	-	-	-	-	-	-	-	-	-	-	-
1	S%TDT	8.6e-17	14	17	7.4e-09	1	0.078	1	0.001	9.5e-05	global-S%TDT	CASSHTDTQYF	TCRBV07-03	TCRBJ02-03	NA	03/0902:HD2_Tscm	1	-	-	-	-	-	-	-	-	-	-	-
1	S%TDT	8.6e-17	14	17	7.4e-09	1	0.078	1	0.001	9.5e-05	global-S%TDT	CASSHTDTQYF	TCRBV14-01	TCRBJ02-03	NA	03/0902:HD2_Tscm	1	-	-	-	-	-	-	-	-	-	-	-
1	S%TDT	8.6e-17	14	17	7.4e-09	1	0.078	1	0.001	9.5e-05	global-S%TDT	CASSHTDTQYF	TCRBV02-01	TCRBJ02-03	NA	03/0902:HD2_Tscm	1	-	-	-	-	-	-	-	-	-	-	-
1	S%TDT	8.6e-17	14	17	7.4e-09	1	0.078	1	0.001	9.5e-05	global-S%TDT	CASSHTDTQYF	TCRBV11-02	TCRBJ02-03	NA	03/0902:HD2_Tscm	1	-	-	-	-	-	-	-	-	-	-	-
1	S%TDT	8.6e-17	14	17	7.4e-09	1	0.078	1	0.001	9.5e-05	global-S%TDT	CASSHTDTQYF	TCRBV14-01	TCRBJ02-03	NA	03/0906:HD6_Tscm	1	-	-	-	-	-	-	-	-	-	-	-
1	S%TDT	8.6e-17	14	17	7.4e-09	1	0.078	1	0.001	9.5e-05	global-S%TDT	CASSHTDTQYF	TCRBV11-02	TCRBJ02-03	NA	03/0912:T1D4_Tscm	1	-	-	-	-	-	-	-	-	-	-	-
1	S%TDT	8.6e-17	14	17	7.4e-09	1	0.078	1	0.001	9.5e-05	global-S%TDT	CASSHTDTQYF	TCRBV14-01	TCRBJ02-03	NA	03/0912:T1D4_Tscm	1	-	-	-	-	-	-	-	-	-	-	-
1	S%TDT	8.6e-17	14	17	7.4e-09	1	0.078	1	0.001	9.5e-05	global-S%TDT	CASSSTDTQYF	TCRBV05-06	TCRBJ02-03	NA	03/0902:HD2_Tscm	1	-	-	-	-	-	-	-	-	-	-	-
1	S%TDT	8.6e-17	14	17	7.4e-09	1	0.078	1	0.001	9.5e-05	global-S%TDT	CASSSTDTQYF	TCRBV18-01	TCRBJ02-03	NA	03/0902:HD2_Tscm	1	-	-	-	-	-	-	-	-	-	-	-
1	S%TDT	8.6e-17	14	17	7.4e-09	1	0.078	1	0.001	9.5e-05	global-S%TDT	CASSSTDTQYF	TCRBV07-02	TCRBJ02-03	NA	03/0902:HD2_Tscm	1	-	-	-	-	-	-	-	-	-	-	-
1	S%TDT	8.6e-17	14	17	7.4e-09	1	0.078	1	0.001	9.5e-05	global-S%TDT	CASSSTDTQYF	TCRBV02-01	TCRBJ02-03	NA	03/0902:HD2_Tscm	1	-	-	-	-	-	-	-	-	-	-	-
1	S%TDT	8.6e-17	14	17	7.4e-09	1	0.078	1	0.001	9.5e-05	global-S%TDT	CASSSTDTQYF	TCRBV07-09	TCRBJ02-03	NA	03/0902:HD2_Tscm	1	-	-	-	-	-	-	-	-	-	-	-
1	S%TDT	8.6e-17	14	17	7.4e-09	1	0.078	1	0.001	9.5e-05	global-S%TDT	CASSSTDTQYF	TCRBV19-01	TCRBJ02-03	NA	03/0906:HD6_Tscm	1	-	-	-	-	-	-	-	-	-	-	-
1	S%TDT	8.6e-17	14	17	7.4e-09	1	0.078	1	0.001	9.5e-05	global-S%TDT	CASSSTDTQYF	TCRBV04-02	TCRBJ02-03	NA	03/0906:HD6_Tscm	1	-	-	-	-	-	-	-	-	-	-	-
1	S%TDT	8.6e-17	14	17	7.4e-09	1	0.078	1	0.001	9.5e-05	global-S%TDT	CASSSTDTQYF	TCRBV28-01	TCRBJ02-03	NA	03/0906:HD6_Tscm	1	-	-	-	-	-	-	-	-	-	-	-
1	S%TDT	8.6e-17	14	17	7.4e-09	1	0.078	1	0.001	9.5e-05	global-S%TDT	CASSSTDTQYF	TCRBV07-02	TCRBJ02-03	NA	03/0906:HD6_Tscm	1	-	-	-	-	-	-	-	-	-	-	-
1	S%TDT	8.6e-17	14	17	7.4e-09	1	0.078	1	0.001	9.5e-05	global-S%TDT	CASSSTDTQYF	TCRBV18-01	TCRBJ02-03	NA	03/0906:HD6_Tscm	1	-	-	-	-	-	-	-	-	-	-	-
1	S%TDT	8.6e-17	14	17	7.4e-09	1	0.078	1	0.001	9.5e-05	global-S%TDT	CASSSTDTQYF	TCRBV07-09	TCRBJ02-03	NA	03/0906:HD6_Tscm	1	-	-	-	-	-	-	-	-	-	-	-
1	S%TDT	8.6e-17	14	17	7.4e-09	1	0.078	1	0.001	9.5e-05	global-S%TDT	CASSSTDTQYF	TCRBV02-01	TCRBJ02-03	NA	03/0907:HD7_Tscm	1	-	-	-	-	-	-	-	-	-	-	-
1	S%TDT	8.6e-17	14	17	7.4e-09	1	0.078	1	0.001	9.5e-05	global-S%TDT	CASSSTDTQYF	TCRBV13-01	TCRBJ02-03	NA	03/0907:HD7_Tscm	1	-	-	-	-	-	-	-	-	-	-	-
1	S%TDT	8.6e-17	14	17	7.4e-09	1	0.078	1	0.001	9.5e-05	global-S%TDT	CASSSTDTQYF	TCRBV19-01	TCRBJ02-03	NA	03/0907:HD7_Tscm	1	-	-	-	-	-	-	-	-	-	-	-
1	S%TDT	8.6e-17	14	17	7.4e-09	1	0.078	1	0.001	9.5e-05	global-S%TDT	CASSSTDTQYF	TCRBV07-02	TCRBJ02-03	NA	03/0907:HD7_Tscm	1	-	-	-	-	-	-	-	-	-	-	-
1	S%TDT	8.6e-17	14	17	7.4e-09	1	0.078	1	0.001	9.5e-05	global-S%TDT	CASSSTDTQYF	TCRBV06-05	TCRBJ02-03	NA	03/0907:HD7_Tscm	1	-	-	-	-	-	-	-	-	-	-	-
1	S%TDT	8.6e-17	14	17	7.4e-09	1	0.078	1	0.001	9.5e-05	global-S%TDT	CASSSTDTQYF	TCRBV07-03	TCRBJ02-03	NA	03/0907:HD7_Tscm	1	-	-	-	-	-	-	-	-	-	-	-
1	S%TDT	8.6e-17	14	17	7.4e-09	1	0.078	1	0.001	9.5e-05	global-S%TDT	CASSSTDTQYF	TCRBV12-03	TCRBJ02-03	NA	03/0907:HD7_Tscm	1	-	-	-	-	-	-	-	-	-	-	-
1	S%TDT	8.6e-17	14	17	7.4e-09	1	0.078	1	0.001	9.5e-05	global-S%TDT	CASSSTDTQYF	TCRBV18-01	TCRBJ02-03	NA	03/0907:HD7_Tscm	1	-	-	-	-	-	-	-	-	-	-	-
1	S%TDT	8.6e-17	14	17	7.4e-09	1	0.078	1	0.001	9.5e-05	global-S%TDT	CASSSTDTQYF	TCRBV18-01	TCRBJ02-03	NA	03/0909:T1D1_Tscm	1	-	-	-	-	-	-	-	-	-	-	-
1	S%TDT	8.6e-17	14	17	7.4e-09	1	0.078	1	0.001	9.5e-05	global-S%TDT	CASSSTDTQYF	TCRBV07-09	TCRBJ02-03	NA	03/0909:T1D1_Tscm	1	-	-	-	-	-	-	-	-	-	-	-
1	S%TDT	8.6e-17	14	17	7.4e-09	1	0.078	1	0.001	9.5e-05	global-S%TDT	CASSSTDTQYF	TCRBV05-01	TCRBJ02-03	NA	03/0909:T1D1_Tscm	1	-	-	-	-	-	-	-	-	-	-	-
1	S%TDT	8.6e-17	14	17	7.4e-09	1	0.078	1	0.001	9.5e-05	global-S%TDT	CASSSTDTQYF	TCRBV19-01	TCRBJ02-03	NA	03/0909:T1D1_Tscm	1	-	-	-	-	-	-	-	-	-	-	-
1	S%TDT	8.6e-17	14	17	7.4e-09	1	0.078	1	0.001	9.5e-05	global-S%TDT	CASSSTDTQYF	TCRBV07-02	TCRBJ02-03	NA	03/0911:T1D3_Tscm	1	-	-	-	-	-	-	-	-	-	-	-
1	S%TDT	8.6e-17	14	17	7.4e-09	1	0.078	1	0.001	9.5e-05	global-S%TDT	CASSSTDTQYF	TCRBV06-05	TCRBJ02-03	NA	03/0911:T1D3_Tscm	1	-	-	-	-	-	-	-	-	-	-	-
1	S%TDT	8.6e-17	14	17	7.4e-09	1	0.078	1	0.001	9.5e-05	global-S%TDT	CASSSTDTQYF	TCRBV28-01	TCRBJ02-03	NA	03/0911:T1D3_Tscm	1	-	-	-	-	-	-	-	-	-	-	-
1	S%TDT	8.6e-17	14	17	7.4e-09	1	0.078	1	0.001	9.5e-05	global-S%TDT	CASSSTDTQYF	TCRBV07-09	TCRBJ02-03	NA	03/0911:T1D3_Tscm	1	-	-	-	-	-	-	-	-	-	-	-
1	S%TDT	8.6e-17	14	17	7.4e-09	1	0.078	1	0.001	9.5e-05	global-S%TDT	CASSSTDTQYF	TCRBV05-04	TCRBJ02-03	NA	03/0913:T1D5_Tscm	1	-	-	-	-	-	-	-	-	-	-	-
1	S%TDT	8.6e-17	14	17	7.4e-09	1	0.078	1	0.001	9.5e-05	global-S%TDT	CASSSTDTQYF	TCRBV12-03	TCRBJ02-03	NA	03/0913:T1D5_Tscm	1	-	-	-	-	-	-	-	-	-	-	-
1	S%TDT	8.6e-17	14	17	7.4e-09	1	0.078	1	0.001	9.5e-05	global-S%TDT	CSVSSTDTQYF	TCRBV29-01	TCRBJ02-03	NA	03/0915:T1D7_Tscm	1	-	-	-	-	-	-	-	-	-	-	-
1	S%TDT	8.6e-17	14	17	7.4e-09	1	0.078	1	0.001	9.5e-05	global-S%TDT	CASSLTDTQYF	TCRBV11-02	TCRBJ02-03	NA	03/0902:HD2_Tscm	1	-	-	-	-	-	-	-	-	-	-	-
1	S%TDT	8.6e-17	14	17	7.4e-09	1	0.078	1	0.001	9.5e-05	global-S%TDT	CASSLTDTQYF	TCRBV27-01	TCRBJ02-03	NA	03/0902:HD2_Tscm	1	-	-	-	-	-	-	-	-	-	-	-
1	S%TDT	8.6e-17	14	17	7.4e-09	1	0.078	1	0.001	9.5e-05	global-S%TDT	CASSLTDTQYF	TCRBV05-08	TCRBJ02-03	NA	03/0902:HD2_Tscm	1	-	-	-	-	-	-	-	-	-	-	-
1	S%TDT	8.6e-17	14	17	7.4e-09	1	0.078	1	0.001	9.5e-05	global-S%TDT	CASSLTDTQYF	TCRBV12-03	TCRBJ02-03	NA	03/0902:HD2_Tscm	1	-	-	-	-	-	-	-	-	-	-	-
1	S%TDT	8.6e-17	14	17	7.4e-09	1	0.078	1	0.001	9.5e-05	global-S%TDT	CASSLTDTQYF	TCRBV18-01	TCRBJ02-03	NA	03/0902:HD2_Tscm	1	-	-	-	-	-	-	-	-	-	-	-
1	S%TDT	8.6e-17	14	17	7.4e-09	1	0.078	1	0.001	9.5e-05	global-S%TDT	CASSLTDTQYF	TCRBV02-01	TCRBJ02-03	NA	03/0902:HD2_Tscm	1	-	-	-	-	-	-	-	-	-	-	-
1	S%TDT	8.6e-17	14	17	7.4e-09	1	0.078	1	0.001	9.5e-05	global-S%TDT	CASSLTDTQYF	TCRBV05-01	TCRBJ02-03	NA	03/0902:HD2_Tscm	1	-	-	-	-	-	-	-	-	-	-	-
1	S%TDT	8.6e-17	14	17	7.4e-09	1	0.078	1	0.001	9.5e-05	global-S%TDT	CASSLTDTQYF	TCRBV07-03	TCRBJ02-03	NA	03/0903:HD3_Tscm	1	-	-	-	-	-	-	-	-	-	-	-
1	S%TDT	8.6e-17	14	17	7.4e-09	1	0.078	1	0.001	9.5e-05	global-S%TDT	CASSLTDTQYF	TCRBV07-09	TCRBJ02-03	NA	03/0903:HD3_Tscm	1	-	-	-	-	-	-	-	-	-	-	-
1	S%TDT	8.6e-17	14	17	7.4e-09	1	0.078	1	0.001	9.5e-05	global-S%TDT	CASSLTDTQYF	TCRBV07-02	TCRBJ02-03	NA	03/0903:HD3_Tscm	1	-	-	-	-	-	-	-	-	-	-	-
1	S%TDT	8.6e-17	14	17	7.4e-09	1	0.078	1	0.001	9.5e-05	global-S%TDT	CASSLTDTQYF	TCRBV07-09	TCRBJ02-03	NA	03/0906:HD6_Tscm	1	-	-	-	-	-	-	-	-	-	-	-
1	S%TDT	8.6e-17	14	17	7.4e-09	1	0.078	1	0.001	9.5e-05	global-S%TDT	CASSLTDTQYF	TCRBV05-01	TCRBJ02-03	NA	03/0906:HD6_Tscm	1	-	-	-	-	-	-	-	-	-	-	-
1	S%TDT	8.6e-17	14	17	7.4e-09	1	0.078	1	0.001	9.5e-05	global-S%TDT	CASSLTDTQYF	TCRBV07-06	TCRBJ02-03	NA	03/0906:HD6_Tscm	1	-	-	-	-	-	-	-	-	-	-	-
1	S%TDT	8.6e-17	14	17	7.4e-09	1	0.078	1	0.001	9.5e-05	global-S%TDT	CASSLTDTQYF	TCRBV18-01	TCRBJ02-03	NA	03/0906:HD6_Tscm	1	-	-	-	-	-	-	-	-	-	-	-
1	S%TDT	8.6e-17	14	17	7.4e-09	1	0.078	1	0.001	9.5e-05	global-S%TDT	CASSLTDTQYF	TCRBV02-01	TCRBJ02-03	NA	03/0906:HD6_Tscm	1	-	-	-	-	-	-	-	-	-	-	-
1	S%TDT	8.6e-17	14	17	7.4e-09	1	0.078	1	0.001	9.5e-05	global-S%TDT	CASSLTDTQYF	TCRBV28-01	TCRBJ02-03	NA	03/0906:HD6_Tscm	1	-	-	-	-	-	-	-	-	-	-	-
1	S%TDT	8.6e-17	14	17	7.4e-09	1	0.078	1	0.001	9.5e-05	global-S%TDT	CASSLTDTQYF	TCRBV12-03	TCRBJ02-03	NA	03/0906:HD6_Tscm	1	-	-	-	-	-	-	-	-	-	-	-
1	S%TDT	8.6e-17	14	17	7.4e-09	1	0.078	1	0.001	9.5e-05	global-S%TDT	CASSLTDTQYF	TCRBV03-01	TCRBJ02-03	NA	03/0914:T1D6_Tscm	1	-	-	-	-	-	-	-	-	-	-	-
1	S%TDT	8.6e-17	14	17	7.4e-09	1	0.078	1	0.001	9.5e-05	global-S%TDT	CASSLTDTQYF	TCRBV12-03	TCRBJ02-03	NA	03/0914:T1D6_Tscm	1	-	-	-	-	-	-	-	-	-	-	-
1	S%TDT	8.6e-17	14	17	7.4e-09	1	0.078	1	0.001	9.5e-05	global-S%TDT	CASSLTDTQYF	TCRBV28-01	TCRBJ02-03	NA	03/0915:T1D7_Tscm	1	-	-	-	-	-	-	-	-	-	-	-
1	S%TDT	8.6e-17	14	17	7.4e-09	1	0.078	1	0.001	9.5e-05	global-S%TDT	CASSLTDTQYF	TCRBV06-06	TCRBJ02-03	NA	03/0915:T1D7_Tscm	1	-	-	-	-	-	-	-	-	-	-	-
1	S%TDT	8.6e-17	14	17	7.4e-09	1	0.078	1	0.001	9.5e-05	global-S%TDT	CASSLTDTQYF	TCRBV27-01	TCRBJ02-03	NA	03/0915:T1D7_Tscm	1	-	-	-	-	-	-	-	-	-	-	-
1	S%TDT	8.6e-17	14	17	7.4e-09	1	0.078	1	0.001	9.5e-05	global-S%TDT	CASSLTDTQYF	TCRBV09-01	TCRBJ02-03	NA	03/0915:T1D7_Tscm	1	-	-	-	-	-	-	-	-	-	-	-
1	S%TDT	8.6e-17	14	17	7.4e-09	1	0.078	1	0.001	9.5e-05	global-S%TDT	CASSLTDTQYF	TCRBV03-01	TCRBJ02-03	NA	03/0915:T1D7_Tscm	1	-	-	-	-	-	-	-	-	-	-	-
1	S%TDT	8.6e-17	14	17	7.4e-09	1	0.078	1	0.001	9.5e-05	global-S%TDT	CASSLTDTQYF	TCRBV12-03	TCRBJ02-03	NA	03/0915:T1D7_Tscm	1	-	-	-	-	-	-	-	-	-	-	-
1	S%TDT	8.6e-17	14	17	7.4e-09	1	0.078	1	0.001	9.5e-05	global-S%TDT	CASSLTDTQYF	TCRBV18-01	TCRBJ02-03	NA	03/0915:T1D7_Tscm	1	-	-	-	-	-	-	-	-	-	-	-
1	S%TDT	8.6e-17	14	17	7.4e-09	1	0.078	1	0.001	9.5e-05	global-S%TDT	CASSLTDTQYF	TCRBV05-01	TCRBJ02-03	NA	03/0915:T1D7_Tscm	1	-	-	-	-	-	-	-	-	-	-	-
1	S%TDT	8.6e-17	14	17	7.4e-09	1	0.078	1	0.001	9.5e-05	global-S%TDT	CASSLTDTQYF	TCRBV07-09	TCRBJ02-03	NA	03/0915:T1D7_Tscm	1	-	-	-	-	-	-	-	-	-	-	-
1	S%TDT	8.6e-17	14	17	7.4e-09	1	0.078	1	0.001	9.5e-05	global-S%TDT	CASSITDTQYF	TCRBV05-04	TCRBJ02-03	NA	03/0902:HD2_Tscm	1	-	-	-	-	-	-	-	-	-	-	-
1	S%TDT	8.6e-17	14	17	7.4e-09	1	0.078	1	0.001	9.5e-05	global-S%TDT	CASSFTDTQYF	TCRBV05-01	TCRBJ02-03	NA	03/0902:HD2_Tscm	1	-	-	-	-	-	-	-	-	-	-	-
1	S%TDT	8.6e-17	14	17	7.4e-09	1	0.078	1	0.001	9.5e-05	global-S%TDT	CASSFTDTQYF	TCRBV06-01	TCRBJ02-03	NA	03/0902:HD2_Tscm	1	-	-	-	-	-	-	-	-	-	-	-
1	S%TDT	8.6e-17	14	17	7.4e-09	1	0.078	1	0.001	9.5e-05	global-S%TDT	CASSFTDTQYF	TCRBV12-03	TCRBJ02-03	NA	03/0902:HD2_Tscm	1	-	-	-	-	-	-	-	-	-	-	-
1	S%TDT	8.6e-17	14	17	7.4e-09	1	0.078	1	0.001	9.5e-05	global-S%TDT	CASSFTDTQYF	TCRBV03-01	TCRBJ02-03	NA	03/0902:HD2_Tscm	1	-	-	-	-	-	-	-	-	-	-	-
1	S%TDT	8.6e-17	14	17	7.4e-09	1	0.078	1	0.001	9.5e-05	global-S%TDT	CASSFTDTQYF	TCRBV07-02	TCRBJ02-03	NA	03/0902:HD2_Tscm	1	-	-	-	-	-	-	-	-	-	-	-
1	S%TDT	8.6e-17	14	17	7.4e-09	1	0.078	1	0.001	9.5e-05	global-S%TDT	CASSFTDTQYF	TCRBV07-09	TCRBJ02-03	NA	03/0902:HD2_Tscm	1	-	-	-	-	-	-	-	-	-	-	-
1	S%TDT	8.6e-17	14	17	7.4e-09	1	0.078	1	0.001	9.5e-05	global-S%TDT	CASSFTDTQYF	TCRBV06-06	TCRBJ02-03	NA	03/0906:HD6_Tscm	1	-	-	-	-	-	-	-	-	-	-	-
1	S%TDT	8.6e-17	14	17	7.4e-09	1	0.078	1	0.001	9.5e-05	global-S%TDT	CASSFTDTQYF	TCRBV07-08	TCRBJ02-03	NA	03/0906:HD6_Tscm	1	-	-	-	-	-	-	-	-	-	-	-
1	S%TDT	8.6e-17	14	17	7.4e-09	1	0.078	1	0.001	9.5e-05	global-S%TDT	CASSFTDTQYF	TCRBV28-01	TCRBJ02-03	NA	03/0906:HD6_Tscm	1	-	-	-	-	-	-	-	-	-	-	-
1	S%TDT	8.6e-17	14	17	7.4e-09	1	0.078	1	0.001	9.5e-05	global-S%TDT	CASSFTDTQYF	TCRBV05-06	TCRBJ02-03	NA	03/0909:T1D1_Tscm	1	-	-	-	-	-	-	-	-	-	-	-
1	S%TDT	8.6e-17	14	17	7.4e-09	1	0.078	1	0.001	9.5e-05	global-S%TDT	CASSFTDTQYF	TCRBV12-03	TCRBJ02-03	NA	03/0909:T1D1_Tscm	1	-	-	-	-	-	-	-	-	-	-	-
1	S%TDT	8.6e-17	14	17	7.4e-09	1	0.078	1	0.001	9.5e-05	global-S%TDT	CASSFTDTQYF	TCRBV05-01	TCRBJ02-03	NA	03/0909:T1D1_Tscm	1	-	-	-	-	-	-	-	-	-	-	-
1	S%TDT	8.6e-17	14	17	7.4e-09	1	0.078	1	0.001	9.5e-05	global-S%TDT	CASSFTDTQYF	TCRBV11-01	TCRBJ02-03	NA	03/0912:T1D4_Tscm	1	-	-	-	-	-	-	-	-	-	-	-
1	S%TDT	8.6e-17	14	17	7.4e-09	1	0.078	1	0.001	9.5e-05	global-S%TDT	CASSFTDTQYF	TCRBV05-04	TCRBJ02-03	NA	03/0912:T1D4_Tscm	1	-	-	-	-	-	-	-	-	-	-	-
1	S%TDT	8.6e-17	14	17	7.4e-09	1	0.078	1	0.001	9.5e-05	global-S%TDT	CASSFTDTQYF	TCRBV12-03	TCRBJ02-03	NA	03/0912:T1D4_Tscm	1	-	-	-	-	-	-	-	-	-	-	-
1	S%TDT	8.6e-17	14	17	7.4e-09	1	0.078	1	0.001	9.5e-05	global-S%TDT	CASSATDTQYF	TCRBV05-04	TCRBJ02-03	NA	03/0902:HD2_Tscm	1	-	-	-	-	-	-	-	-	-	-	-
1	S%TDT	8.6e-17	14	17	7.4e-09	1	0.078	1	0.001	9.5e-05	global-S%TDT	CASSATDTQYF	TCRBV02-01	TCRBJ02-03	NA	03/0902:HD2_Tscm	1	-	-	-	-	-	-	-	-	-	-	-
1	S%TDT	8.6e-17	14	17	7.4e-09	1	0.078	1	0.001	9.5e-05	global-S%TDT	CASSATDTQYF	TCRBV09-01	TCRBJ02-03	NA	03/0902:HD2_Tscm	1	-	-	-	-	-	-	-	-	-	-	-
1	S%TDT	8.6e-17	14	17	7.4e-09	1	0.078	1	0.001	9.5e-05	global-S%TDT	CASSATDTQYF	TCRBV07-09	TCRBJ02-03	NA	03/0902:HD2_Tscm	1	-	-	-	-	-	-	-	-	-	-	-
1	S%TDT	8.6e-17	14	17	7.4e-09	1	0.078	1	0.001	9.5e-05	global-S%TDT	CASSATDTQYF	TCRBV07-09	TCRBJ02-03	NA	03/0913:T1D5_Tscm	1	-	-	-	-	-	-	-	-	-	-	-
1	S%TDT	8.6e-17	14	17	7.4e-09	1	0.078	1	0.001	9.5e-05	global-S%TDT	CASSVTDTQYF	TCRBV09-01	TCRBJ02-03	NA	03/0902:HD2_Tscm	1	-	-	-	-	-	-	-	-	-	-	-
1	S%TDT	8.6e-17	14	17	7.4e-09	1	0.078	1	0.001	9.5e-05	global-S%TDT	CASSVTDTQYF	TCRBV25-01	TCRBJ02-03	NA	03/0902:HD2_Tscm	1	-	-	-	-	-	-	-	-	-	-	-
1	S%TDT	8.6e-17	14	17	7.4e-09	1	0.078	1	0.001	9.5e-05	global-S%TDT	CASSVTDTQYF	TCRBV05-04	TCRBJ02-03	NA	03/0902:HD2_Tscm	1	-	-	-	-	-	-	-	-	-	-	-
1	S%TDT	8.6e-17	14	17	7.4e-09	1	0.078	1	0.001	9.5e-05	global-S%TDT	CASSVTDTQYF	TCRBV07-09	TCRBJ02-03	NA	03/0902:HD2_Tscm	1	-	-	-	-	-	-	-	-	-	-	-
1	S%TDT	8.6e-17	14	17	7.4e-09	1	0.078	1	0.001	9.5e-05	global-S%TDT	CASSVTDTQYF	TCRBV05-01	TCRBJ02-03	NA	03/0906:HD6_Tscm	1	-	-	-	-	-	-	-	-	-	-	-
1	S%TDT	8.6e-17	14	17	7.4e-09	1	0.078	1	0.001	9.5e-05	global-S%TDT	CASSVTDTQYF	TCRBV11-02	TCRBJ02-03	NA	03/0906:HD6_Tscm	1	-	-	-	-	-	-	-	-	-	-	-
1	S%TDT	8.6e-17	14	17	7.4e-09	1	0.078	1	0.001	9.5e-05	global-S%TDT	CASSVTDTQYF	TCRBV09-01	TCRBJ02-03	NA	03/0906:HD6_Tscm	1	-	-	-	-	-	-	-	-	-	-	-
1	S%TDT	8.6e-17	14	17	7.4e-09	1	0.078	1	0.001	9.5e-05	global-S%TDT	CASSVTDTQYF	TCRBV12-03	TCRBJ02-03	NA	03/0906:HD6_Tscm	1	-	-	-	-	-	-	-	-	-	-	-
1	S%TDT	8.6e-17	14	17	7.4e-09	1	0.078	1	0.001	9.5e-05	global-S%TDT	CASSVTDTQYF	TCRBV07-09	TCRBJ02-03	NA	03/0915:T1D7_Tscm	1	-	-	-	-	-	-	-	-	-	-	-
1	S%TDT	8.6e-17	14	17	7.4e-09	1	0.078	1	0.001	9.5e-05	global-S%TDT	CASSVTDTQYF	TCRBV07-02	TCRBJ02-03	NA	03/0915:T1D7_Tscm	1	-	-	-	-	-	-	-	-	-	-	-
1	S%TDT	8.6e-17	14	17	7.4e-09	1	0.078	1	0.001	9.5e-05	global-S%TDT	CASSGTDTQYF	TCRBV11-02	TCRBJ02-03	NA	03/0906:HD6_Tscm	1	-	-	-	-	-	-	-	-	-	-	-
1	S%TDT	8.6e-17	14	17	7.4e-09	1	0.078	1	0.001	9.5e-05	global-S%TDT	CASSGTDTQYF	TCRBV05-01	TCRBJ02-03	NA	03/0906:HD6_Tscm	1	-	-	-	-	-	-	-	-	-	-	-
1	S%TDT	8.6e-17	14	17	7.4e-09	1	0.078	1	0.001	9.5e-05	global-S%TDT	CASSGTDTQYF	TCRBV09-01	TCRBJ02-03	NA	03/0906:HD6_Tscm	1	-	-	-	-	-	-	-	-	-	-	-
1	S%TDT	8.6e-17	14	17	7.4e-09	1	0.078	1	0.001	9.5e-05	global-S%TDT	CASSGTDTQYF	TCRBV18-01	TCRBJ02-03	NA	03/0906:HD6_Tscm	1	-	-	-	-	-	-	-	-	-	-	-
1	S%TDT	8.6e-17	14	17	7.4e-09	1	0.078	1	0.001	9.5e-05	global-S%TDT	CASSTTDTQYF	TCRBV07-06	TCRBJ02-03	NA	03/0908:HD8_Tscm	1	-	-	-	-	-	-	-	-	-	-	-
1	S%TDT	8.6e-17	14	17	7.4e-09	1	0.078	1	0.001	9.5e-05	global-S%TDT	CASSTTDTQYF	TCRBV07-09	TCRBJ02-03	NA	03/0908:HD8_Tscm	1	-	-	-	-	-	-	-	-	-	-	-
1	S%TDT	8.6e-17	14	17	7.4e-09	1	0.078	1	0.001	9.5e-05	global-S%TDT	CASSTTDTQYF	TCRBV18-01	TCRBJ02-03	NA	03/0913:T1D5_Tscm	1	-	-	-	-	-	-	-	-	-	-	-
1	S%TDT	8.6e-17	14	17	7.4e-09	1	0.078	1	0.001	9.5e-05	global-S%TDT	CASSYTDTQYF	TCRBV12-03	TCRBJ02-03	NA	03/0902:HD2_Tscm	1	-	-	-	-	-	-	-	-	-	-	-
1	S%TDT	8.6e-17	14	17	7.4e-09	1	0.078	1	0.001	9.5e-05	global-S%TDT	CASSYTDTQYF	TCRBV05-01	TCRBJ02-03	NA	03/0902:HD2_Tscm	1	-	-	-	-	-	-	-	-	-	-	-
1	S%TDT	8.6e-17	14	17	7.4e-09	1	0.078	1	0.001	9.5e-05	global-S%TDT	CASSYTDTQYF	TCRBV02-01	TCRBJ02-03	NA	03/0902:HD2_Tscm	1	-	-	-	-	-	-	-	-	-	-	-
1	S%TDT	8.6e-17	14	17	7.4e-09	1	0.078	1	0.001	9.5e-05	global-S%TDT	CASSYTDTQYF	TCRBV06-02	TCRBJ02-03	NA	03/0902:HD2_Tscm	1	-	-	-	-	-	-	-	-	-	-	-
1	S%TDT	8.6e-17	14	17	7.4e-09	1	0.078	1	0.001	9.5e-05	global-S%TDT	CASSYTDTQYF	TCRBV12-03	TCRBJ02-03	NA	03/0906:HD6_Tscm	1	-	-	-	-	-	-	-	-	-	-	-
1	S%TDT	8.6e-17	14	17	7.4e-09	1	0.078	1	0.001	9.5e-05	global-S%TDT	CASSYTDTQYF	TCRBV28-01	TCRBJ02-03	NA	03/0906:HD6_Tscm	1	-	-	-	-	-	-	-	-	-	-	-
1	S%TDT	8.6e-17	14	17	7.4e-09	1	0.078	1	0.001	9.5e-05	global-S%TDT	CASSYTDTQYF	TCRBV05-01	TCRBJ02-03	NA	03/0906:HD6_Tscm	1	-	-	-	-	-	-	-	-	-	-	-
1	S%TDT	8.6e-17	14	17	7.4e-09	1	0.078	1	0.001	9.5e-05	global-S%TDT	CASSYTDTQYF	TCRBV02-01	TCRBJ02-03	NA	03/0906:HD6_Tscm	1	-	-	-	-	-	-	-	-	-	-	-
1	S%TDT	8.6e-17	14	17	7.4e-09	1	0.078	1	0.001	9.5e-05	global-S%TDT	CASSYTDTQYF	TCRBV06-02	TCRBJ02-03	NA	03/0909:T1D1_Tscm	1	-	-	-	-	-	-	-	-	-	-	-
1	S%TDT	8.6e-17	14	17	7.4e-09	1	0.078	1	0.001	9.5e-05	global-S%TDT	CASSYTDTQYF	TCRBV02-01	TCRBJ02-03	NA	03/0909:T1D1_Tscm	1	-	-	-	-	-	-	-	-	-	-	-
1	S%TDT	8.6e-17	14	17	7.4e-09	1	0.078	1	0.001	9.5e-05	global-S%TDT	CSVSLTDTQYF	TCRBV29-01	TCRBJ02-03	NA	03/0906:HD6_Tscm	1	-	-	-	-	-	-	-	-	-	-	-
2	S%QET	1.6e-16	15	18	8.6e-11	1	0.001	1	0.001	8.6e-05	global-S%QET	CASSFQETQYF	TCRBV04-02	TCRBJ02-05	NA	03/0902:HD2_Tscm	1	-	-	-	-	-	-	-	-	-	-	-
2	S%QET	1.6e-16	15	18	8.6e-11	1	0.001	1	0.001	8.6e-05	global-S%QET	CASSFQETQYF	TCRBV07-06	TCRBJ02-05	NA	03/0902:HD2_Tscm	1	-	-	-	-	-	-	-	-	-	-	-
2	S%QET	1.6e-16	15	18	8.6e-11	1	0.001	1	0.001	8.6e-05	global-S%QET	CASSFQETQYF	TCRBV06-02	TCRBJ02-05	NA	03/0902:HD2_Tscm	1	-	-	-	-	-	-	-	-	-	-	-
2	S%QET	1.6e-16	15	18	8.6e-11	1	0.001	1	0.001	8.6e-05	global-S%QET	CASSFQETQYF	TCRBV05-06	TCRBJ02-05	NA	03/0902:HD2_Tscm	1	-	-	-	-	-	-	-	-	-	-	-
2	S%QET	1.6e-16	15	18	8.6e-11	1	0.001	1	0.001	8.6e-05	global-S%QET	CASSFQETQYF	TCRBV06-06	TCRBJ02-05	NA	03/0902:HD2_Tscm	1	-	-	-	-	-	-	-	-	-	-	-
2	S%QET	1.6e-16	15	18	8.6e-11	1	0.001	1	0.001	8.6e-05	global-S%QET	CASSFQETQYF	TCRBV06-01	TCRBJ02-05	NA	03/0902:HD2_Tscm	1	-	-	-	-	-	-	-	-	-	-	-
2	S%QET	1.6e-16	15	18	8.6e-11	1	0.001	1	0.001	8.6e-05	global-S%QET	CASSFQETQYF	TCRBV11-03	TCRBJ02-05	NA	03/0902:HD2_Tscm	1	-	-	-	-	-	-	-	-	-	-	-
2	S%QET	1.6e-16	15	18	8.6e-11	1	0.001	1	0.001	8.6e-05	global-S%QET	CASSFQETQYF	TCRBV06-05	TCRBJ02-05	NA	03/0902:HD2_Tscm	1	-	-	-	-	-	-	-	-	-	-	-
2	S%QET	1.6e-16	15	18	8.6e-11	1	0.001	1	0.001	8.6e-05	global-S%QET	CASSFQETQYF	TCRBV12-03	TCRBJ02-05	NA	03/0902:HD2_Tscm	1	-	-	-	-	-	-	-	-	-	-	-
2	S%QET	1.6e-16	15	18	8.6e-11	1	0.001	1	0.001	8.6e-05	global-S%QET	CASSFQETQYF	TCRBV02-01	TCRBJ02-05	NA	03/0902:HD2_Tscm	1	-	-	-	-	-	-	-	-	-	-	-
2	S%QET	1.6e-16	15	18	8.6e-11	1	0.001	1	0.001	8.6e-05	global-S%QET	CASSFQETQYF	TCRBV05-01	TCRBJ02-05	NA	03/0902:HD2_Tscm	1	-	-	-	-	-	-	-	-	-	-	-
2	S%QET	1.6e-16	15	18	8.6e-11	1	0.001	1	0.001	8.6e-05	global-S%QET	CASSFQETQYF	TCRBV07-09	TCRBJ02-05	NA	03/0902:HD2_Tscm	1	-	-	-	-	-	-	-	-	-	-	-
2	S%QET	1.6e-16	15	18	8.6e-11	1	0.001	1	0.001	8.6e-05	global-S%QET	CASSFQETQYF	TCRBV07-02	TCRBJ02-05	NA	03/0902:HD2_Tscm	1	-	-	-	-	-	-	-	-	-	-	-
2	S%QET	1.6e-16	15	18	8.6e-11	1	0.001	1	0.001	8.6e-05	global-S%QET	CASSFQETQYF	TCRBV11-02	TCRBJ02-05	NA	03/0904:HD4_Tscm	1	-	-	-	-	-	-	-	-	-	-	-
2	S%QET	1.6e-16	15	18	8.6e-11	1	0.001	1	0.001	8.6e-05	global-S%QET	CASSFQETQYF	TCRBV05-01	TCRBJ02-05	NA	03/0904:HD4_Tscm	1	-	-	-	-	-	-	-	-	-	-	-
2	S%QET	1.6e-16	15	18	8.6e-11	1	0.001	1	0.001	8.6e-05	global-S%QET	CASSFQETQYF	TCRBV05-04	TCRBJ02-05	NA	03/0904:HD4_Tscm	1	-	-	-	-	-	-	-	-	-	-	-
2	S%QET	1.6e-16	15	18	8.6e-11	1	0.001	1	0.001	8.6e-05	global-S%QET	CASSFQETQYF	TCRBV12-03	TCRBJ02-05	NA	03/0906:HD6_Tscm	1	-	-	-	-	-	-	-	-	-	-	-
2	S%QET	1.6e-16	15	18	8.6e-11	1	0.001	1	0.001	8.6e-05	global-S%QET	CASSFQETQYF	TCRBV02-01	TCRBJ02-05	NA	03/0906:HD6_Tscm	1	-	-	-	-	-	-	-	-	-	-	-
2	S%QET	1.6e-16	15	18	8.6e-11	1	0.001	1	0.001	8.6e-05	global-S%QET	CASSFQETQYF	TCRBV11-02	TCRBJ02-05	NA	03/0906:HD6_Tscm	1	-	-	-	-	-	-	-	-	-	-	-
2	S%QET	1.6e-16	15	18	8.6e-11	1	0.001	1	0.001	8.6e-05	global-S%QET	CASSFQETQYF	TCRBV07-02	TCRBJ02-05	NA	03/0906:HD6_Tscm	1	-	-	-	-	-	-	-	-	-	-	-
2	S%QET	1.6e-16	15	18	8.6e-11	1	0.001	1	0.001	8.6e-05	global-S%QET	CASSFQETQYF	TCRBV18-01	TCRBJ02-05	NA	03/0906:HD6_Tscm	1	-	-	-	-	-	-	-	-	-	-	-
2	S%QET	1.6e-16	15	18	8.6e-11	1	0.001	1	0.001	8.6e-05	global-S%QET	CASSFQETQYF	TCRBV05-01	TCRBJ02-05	NA	03/0906:HD6_Tscm	1	-	-	-	-	-	-	-	-	-	-	-
2	S%QET	1.6e-16	15	18	8.6e-11	1	0.001	1	0.001	8.6e-05	global-S%QET	CASSFQETQYF	TCRBV07-08	TCRBJ02-05	NA	03/0906:HD6_Tscm	1	-	-	-	-	-	-	-	-	-	-	-
2	S%QET	1.6e-16	15	18	8.6e-11	1	0.001	1	0.001	8.6e-05	global-S%QET	CASSFQETQYF	TCRBV07-09	TCRBJ02-05	NA	03/0906:HD6_Tscm	1	-	-	-	-	-	-	-	-	-	-	-
2	S%QET	1.6e-16	15	18	8.6e-11	1	0.001	1	0.001	8.6e-05	global-S%QET	CASSFQETQYF	TCRBV02-01	TCRBJ02-05	NA	03/0907:HD7_Tscm	1	-	-	-	-	-	-	-	-	-	-	-
2	S%QET	1.6e-16	15	18	8.6e-11	1	0.001	1	0.001	8.6e-05	global-S%QET	CASSFQETQYF	TCRBV07-02	TCRBJ02-05	NA	03/0907:HD7_Tscm	1	-	-	-	-	-	-	-	-	-	-	-
2	S%QET	1.6e-16	15	18	8.6e-11	1	0.001	1	0.001	8.6e-05	global-S%QET	CASSFQETQYF	TCRBV12-03	TCRBJ02-05	NA	03/0907:HD7_Tscm	1	-	-	-	-	-	-	-	-	-	-	-
2	S%QET	1.6e-16	15	18	8.6e-11	1	0.001	1	0.001	8.6e-05	global-S%QET	CASSFQETQYF	TCRBV11-02	TCRBJ02-05	NA	03/0910:T1D2_Tscm	1	-	-	-	-	-	-	-	-	-	-	-
2	S%QET	1.6e-16	15	18	8.6e-11	1	0.001	1	0.001	8.6e-05	global-S%QET	CASSFQETQYF	TCRBV05-01	TCRBJ02-05	NA	03/0910:T1D2_Tscm	1	-	-	-	-	-	-	-	-	-	-	-
2	S%QET	1.6e-16	15	18	8.6e-11	1	0.001	1	0.001	8.6e-05	global-S%QET	CASSFQETQYF	TCRBV07-02	TCRBJ02-05	NA	03/0910:T1D2_Tscm	1	-	-	-	-	-	-	-	-	-	-	-
2	S%QET	1.6e-16	15	18	8.6e-11	1	0.001	1	0.001	8.6e-05	global-S%QET	CASSFQETQYF	TCRBV05-01	TCRBJ02-05	NA	03/0915:T1D7_Tscm	1	-	-	-	-	-	-	-	-	-	-	-
2	S%QET	1.6e-16	15	18	8.6e-11	1	0.001	1	0.001	8.6e-05	global-S%QET	CASSFQETQYF	TCRBV07-09	TCRBJ02-05	NA	03/0915:T1D7_Tscm	1	-	-	-	-	-	-	-	-	-	-	-
2	S%QET	1.6e-16	15	18	8.6e-11	1	0.001	1	0.001	8.6e-05	global-S%QET	CASSGQETQYF	TCRBV18-01	TCRBJ02-05	NA	03/0902:HD2_Tscm	1	-	-	-	-	-	-	-	-	-	-	-
2	S%QET	1.6e-16	15	18	8.6e-11	1	0.001	1	0.001	8.6e-05	global-S%QET	CASSGQETQYF	TCRBV07-02	TCRBJ02-05	NA	03/0902:HD2_Tscm	1	-	-	-	-	-	-	-	-	-	-	-
2	S%QET	1.6e-16	15	18	8.6e-11	1	0.001	1	0.001	8.6e-05	global-S%QET	CASSGQETQYF	TCRBV02-01	TCRBJ02-05	NA	03/0902:HD2_Tscm	1	-	-	-	-	-	-	-	-	-	-	-
2	S%QET	1.6e-16	15	18	8.6e-11	1	0.001	1	0.001	8.6e-05	global-S%QET	CASSGQETQYF	TCRBV12-03	TCRBJ02-05	NA	03/0903:HD3_Tscm	1	-	-	-	-	-	-	-	-	-	-	-
2	S%QET	1.6e-16	15	18	8.6e-11	1	0.001	1	0.001	8.6e-05	global-S%QET	CASSGQETQYF	TCRBV09-01	TCRBJ02-05	NA	03/0903:HD3_Tscm	1	-	-	-	-	-	-	-	-	-	-	-
2	S%QET	1.6e-16	15	18	8.6e-11	1	0.001	1	0.001	8.6e-05	global-S%QET	CASSGQETQYF	TCRBV07-09	TCRBJ02-05	NA	03/0915:T1D7_Tscm	1	-	-	-	-	-	-	-	-	-	-	-
2	S%QET	1.6e-16	15	18	8.6e-11	1	0.001	1	0.001	8.6e-05	global-S%QET	CAWSLQETQYF	TCRBV30-01	TCRBJ02-05	NA	03/0905:HD5_Tscm	1	-	-	-	-	-	-	-	-	-	-	-
2	S%QET	1.6e-16	15	18	8.6e-11	1	0.001	1	0.001	8.6e-05	global-S%QET	CASSLQETQYF	TCRBV05-06	TCRBJ02-05	NA	03/0902:HD2_Tscm	1	-	-	-	-	-	-	-	-	-	-	-
2	S%QET	1.6e-16	15	18	8.6e-11	1	0.001	1	0.001	8.6e-05	global-S%QET	CASSLQETQYF	TCRBV06-01	TCRBJ02-05	NA	03/0902:HD2_Tscm	1	-	-	-	-	-	-	-	-	-	-	-
2	S%QET	1.6e-16	15	18	8.6e-11	1	0.001	1	0.001	8.6e-05	global-S%QET	CASSLQETQYF	TCRBV06-02	TCRBJ02-05	NA	03/0902:HD2_Tscm	1	-	-	-	-	-	-	-	-	-	-	-
2	S%QET	1.6e-16	15	18	8.6e-11	1	0.001	1	0.001	8.6e-05	global-S%QET	CASSLQETQYF	TCRBV27-01	TCRBJ02-05	NA	03/0902:HD2_Tscm	1	-	-	-	-	-	-	-	-	-	-	-
2	S%QET	1.6e-16	15	18	8.6e-11	1	0.001	1	0.001	8.6e-05	global-S%QET	CASSLQETQYF	TCRBV11-02	TCRBJ02-05	NA	03/0902:HD2_Tscm	1	-	-	-	-	-	-	-	-	-	-	-
2	S%QET	1.6e-16	15	18	8.6e-11	1	0.001	1	0.001	8.6e-05	global-S%QET	CASSLQETQYF	TCRBV07-02	TCRBJ02-05	NA	03/0902:HD2_Tscm	1	-	-	-	-	-	-	-	-	-	-	-
2	S%QET	1.6e-16	15	18	8.6e-11	1	0.001	1	0.001	8.6e-05	global-S%QET	CASSLQETQYF	TCRBV18-01	TCRBJ02-05	NA	03/0902:HD2_Tscm	1	-	-	-	-	-	-	-	-	-	-	-
2	S%QET	1.6e-16	15	18	8.6e-11	1	0.001	1	0.001	8.6e-05	global-S%QET	CASSLQETQYF	TCRBV05-01	TCRBJ02-05	NA	03/0902:HD2_Tscm	1	-	-	-	-	-	-	-	-	-	-	-
2	S%QET	1.6e-16	15	18	8.6e-11	1	0.001	1	0.001	8.6e-05	global-S%QET	CASSLQETQYF	TCRBV12-03	TCRBJ02-05	NA	03/0902:HD2_Tscm	1	-	-	-	-	-	-	-	-	-	-	-
2	S%QET	1.6e-16	15	18	8.6e-11	1	0.001	1	0.001	8.6e-05	global-S%QET	CASSLQETQYF	TCRBV05-05	TCRBJ02-05	NA	03/0903:HD3_Tscm	1	-	-	-	-	-	-	-	-	-	-	-
2	S%QET	1.6e-16	15	18	8.6e-11	1	0.001	1	0.001	8.6e-05	global-S%QET	CASSLQETQYF	TCRBV18-01	TCRBJ02-05	NA	03/0903:HD3_Tscm	1	-	-	-	-	-	-	-	-	-	-	-
2	S%QET	1.6e-16	15	18	8.6e-11	1	0.001	1	0.001	8.6e-05	global-S%QET	CASSLQETQYF	TCRBV07-02	TCRBJ02-05	NA	03/0903:HD3_Tscm	1	-	-	-	-	-	-	-	-	-	-	-
2	S%QET	1.6e-16	15	18	8.6e-11	1	0.001	1	0.001	8.6e-05	global-S%QET	CASSLQETQYF	TCRBV05-04	TCRBJ02-05	NA	03/0903:HD3_Tscm	1	-	-	-	-	-	-	-	-	-	-	-
2	S%QET	1.6e-16	15	18	8.6e-11	1	0.001	1	0.001	8.6e-05	global-S%QET	CASSLQETQYF	TCRBV05-01	TCRBJ02-05	NA	03/0903:HD3_Tscm	1	-	-	-	-	-	-	-	-	-	-	-
2	S%QET	1.6e-16	15	18	8.6e-11	1	0.001	1	0.001	8.6e-05	global-S%QET	CASSLQETQYF	TCRBV07-02	TCRBJ02-05	NA	03/0904:HD4_Tscm	1	-	-	-	-	-	-	-	-	-	-	-
2	S%QET	1.6e-16	15	18	8.6e-11	1	0.001	1	0.001	8.6e-05	global-S%QET	CASSLQETQYF	TCRBV12-03	TCRBJ02-05	NA	03/0904:HD4_Tscm	1	-	-	-	-	-	-	-	-	-	-	-
2	S%QET	1.6e-16	15	18	8.6e-11	1	0.001	1	0.001	8.6e-05	global-S%QET	CASSLQETQYF	TCRBV05-06	TCRBJ02-05	NA	03/0906:HD6_Tscm	1	-	-	-	-	-	-	-	-	-	-	-
2	S%QET	1.6e-16	15	18	8.6e-11	1	0.001	1	0.001	8.6e-05	global-S%QET	CASSLQETQYF	TCRBV19-01	TCRBJ02-05	NA	03/0906:HD6_Tscm	1	-	-	-	-	-	-	-	-	-	-	-
2	S%QET	1.6e-16	15	18	8.6e-11	1	0.001	1	0.001	8.6e-05	global-S%QET	CASSLQETQYF	TCRBV07-02	TCRBJ02-05	NA	03/0906:HD6_Tscm	1	-	-	-	-	-	-	-	-	-	-	-
2	S%QET	1.6e-16	15	18	8.6e-11	1	0.001	1	0.001	8.6e-05	global-S%QET	CASSLQETQYF	TCRBV07-06	TCRBJ02-05	NA	03/0906:HD6_Tscm	1	-	-	-	-	-	-	-	-	-	-	-
2	S%QET	1.6e-16	15	18	8.6e-11	1	0.001	1	0.001	8.6e-05	global-S%QET	CASSLQETQYF	TCRBV05-04	TCRBJ02-05	NA	03/0906:HD6_Tscm	1	-	-	-	-	-	-	-	-	-	-	-
2	S%QET	1.6e-16	15	18	8.6e-11	1	0.001	1	0.001	8.6e-05	global-S%QET	CASSLQETQYF	TCRBV12-03	TCRBJ02-05	NA	03/0906:HD6_Tscm	1	-	-	-	-	-	-	-	-	-	-	-
2	S%QET	1.6e-16	15	18	8.6e-11	1	0.001	1	0.001	8.6e-05	global-S%QET	CASSLQETQYF	TCRBV07-08	TCRBJ02-05	NA	03/0906:HD6_Tscm	1	-	-	-	-	-	-	-	-	-	-	-
2	S%QET	1.6e-16	15	18	8.6e-11	1	0.001	1	0.001	8.6e-05	global-S%QET	CASSLQETQYF	TCRBV18-01	TCRBJ02-05	NA	03/0906:HD6_Tscm	1	-	-	-	-	-	-	-	-	-	-	-
2	S%QET	1.6e-16	15	18	8.6e-11	1	0.001	1	0.001	8.6e-05	global-S%QET	CASSLQETQYF	TCRBV05-01	TCRBJ02-05	NA	03/0906:HD6_Tscm	1	-	-	-	-	-	-	-	-	-	-	-
2	S%QET	1.6e-16	15	18	8.6e-11	1	0.001	1	0.001	8.6e-05	global-S%QET	CASSLQETQYF	TCRBV07-09	TCRBJ02-05	NA	03/0906:HD6_Tscm	1	-	-	-	-	-	-	-	-	-	-	-
2	S%QET	1.6e-16	15	18	8.6e-11	1	0.001	1	0.001	8.6e-05	global-S%QET	CASSLQETQYF	TCRBV06-05	TCRBJ02-05	NA	03/0907:HD7_Tscm	1	-	-	-	-	-	-	-	-	-	-	-
2	S%QET	1.6e-16	15	18	8.6e-11	1	0.001	1	0.001	8.6e-05	global-S%QET	CASSLQETQYF	TCRBV07-08	TCRBJ02-03	NA	03/0907:HD7_Tscm	1	-	-	-	-	-	-	-	-	-	-	-
2	S%QET	1.6e-16	15	18	8.6e-11	1	0.001	1	0.001	8.6e-05	global-S%QET	CASSLQETQYF	TCRBV07-02	TCRBJ02-05	NA	03/0907:HD7_Tscm	1	-	-	-	-	-	-	-	-	-	-	-
2	S%QET	1.6e-16	15	18	8.6e-11	1	0.001	1	0.001	8.6e-05	global-S%QET	CASSLQETQYF	TCRBV06-02	TCRBJ02-05	NA	03/0907:HD7_Tscm	1	-	-	-	-	-	-	-	-	-	-	-
2	S%QET	1.6e-16	15	18	8.6e-11	1	0.001	1	0.001	8.6e-05	global-S%QET	CASSLQETQYF	TCRBV12-03	TCRBJ02-05	NA	03/0907:HD7_Tscm	1	-	-	-	-	-	-	-	-	-	-	-
2	S%QET	1.6e-16	15	18	8.6e-11	1	0.001	1	0.001	8.6e-05	global-S%QET	CASSLQETQYF	TCRBV05-01	TCRBJ02-05	NA	03/0907:HD7_Tscm	1	-	-	-	-	-	-	-	-	-	-	-
2	S%QET	1.6e-16	15	18	8.6e-11	1	0.001	1	0.001	8.6e-05	global-S%QET	CASSLQETQYF	TCRBV07-09	TCRBJ02-05	NA	03/0907:HD7_Tscm	1	-	-	-	-	-	-	-	-	-	-	-
2	S%QET	1.6e-16	15	18	8.6e-11	1	0.001	1	0.001	8.6e-05	global-S%QET	CASSLQETQYF	TCRBV03-01	TCRBJ02-05	NA	03/0909:T1D1_Tscm	1	-	-	-	-	-	-	-	-	-	-	-
2	S%QET	1.6e-16	15	18	8.6e-11	1	0.001	1	0.001	8.6e-05	global-S%QET	CASSLQETQYF	TCRBV05-01	TCRBJ02-05	NA	03/0909:T1D1_Tscm	1	-	-	-	-	-	-	-	-	-	-	-
2	S%QET	1.6e-16	15	18	8.6e-11	1	0.001	1	0.001	8.6e-05	global-S%QET	CASSLQETQYF	TCRBV06-05	TCRBJ02-05	NA	03/0909:T1D1_Tscm	1	-	-	-	-	-	-	-	-	-	-	-
2	S%QET	1.6e-16	15	18	8.6e-11	1	0.001	1	0.001	8.6e-05	global-S%QET	CASSLQETQYF	TCRBV28-01	TCRBJ02-05	NA	03/0909:T1D1_Tscm	1	-	-	-	-	-	-	-	-	-	-	-
2	S%QET	1.6e-16	15	18	8.6e-11	1	0.001	1	0.001	8.6e-05	global-S%QET	CASSLQETQYF	TCRBV07-09	TCRBJ02-05	NA	03/0910:T1D2_Tscm	1	-	-	-	-	-	-	-	-	-	-	-
2	S%QET	1.6e-16	15	18	8.6e-11	1	0.001	1	0.001	8.6e-05	global-S%QET	CASSLQETQYF	TCRBV07-02	TCRBJ02-05	NA	03/0910:T1D2_Tscm	1	-	-	-	-	-	-	-	-	-	-	-
2	S%QET	1.6e-16	15	18	8.6e-11	1	0.001	1	0.001	8.6e-05	global-S%QET	CASSLQETQYF	TCRBV05-01	TCRBJ02-05	NA	03/0910:T1D2_Tscm	1	-	-	-	-	-	-	-	-	-	-	-
2	S%QET	1.6e-16	15	18	8.6e-11	1	0.001	1	0.001	8.6e-05	global-S%QET	CASSLQETQYF	TCRBV07-08	TCRBJ02-05	NA	03/0911:T1D3_Tscm	1	-	-	-	-	-	-	-	-	-	-	-
2	S%QET	1.6e-16	15	18	8.6e-11	1	0.001	1	0.001	8.6e-05	global-S%QET	CASSLQETQYF	TCRBV05-01	TCRBJ02-05	NA	03/0911:T1D3_Tscm	1	-	-	-	-	-	-	-	-	-	-	-
2	S%QET	1.6e-16	15	18	8.6e-11	1	0.001	1	0.001	8.6e-05	global-S%QET	CASSLQETQYF	TCRBV07-09	TCRBJ02-05	NA	03/0911:T1D3_Tscm	1	-	-	-	-	-	-	-	-	-	-	-
2	S%QET	1.6e-16	15	18	8.6e-11	1	0.001	1	0.001	8.6e-05	global-S%QET	CASSLQETQYF	TCRBV07-02	TCRBJ02-05	NA	03/0911:T1D3_Tscm	1	-	-	-	-	-	-	-	-	-	-	-
2	S%QET	1.6e-16	15	18	8.6e-11	1	0.001	1	0.001	8.6e-05	global-S%QET	CASSLQETQYF	TCRBV18-01	TCRBJ02-05	NA	03/0911:T1D3_Tscm	1	-	-	-	-	-	-	-	-	-	-	-
2	S%QET	1.6e-16	15	18	8.6e-11	1	0.001	1	0.001	8.6e-05	global-S%QET	CASSLQETQYF	TCRBV07-02	TCRBJ02-05	NA	03/0912:T1D4_Tscm	1	-	-	-	-	-	-	-	-	-	-	-
2	S%QET	1.6e-16	15	18	8.6e-11	1	0.001	1	0.001	8.6e-05	global-S%QET	CASSLQETQYF	TCRBV18-01	TCRBJ02-05	NA	03/0912:T1D4_Tscm	1	-	-	-	-	-	-	-	-	-	-	-
2	S%QET	1.6e-16	15	18	8.6e-11	1	0.001	1	0.001	8.6e-05	global-S%QET	CASSLQETQYF	TCRBV27-01	TCRBJ02-05	NA	03/0912:T1D4_Tscm	1	-	-	-	-	-	-	-	-	-	-	-
2	S%QET	1.6e-16	15	18	8.6e-11	1	0.001	1	0.001	8.6e-05	global-S%QET	CASSLQETQYF	TCRBV05-01	TCRBJ02-05	NA	03/0912:T1D4_Tscm	1	-	-	-	-	-	-	-	-	-	-	-
2	S%QET	1.6e-16	15	18	8.6e-11	1	0.001	1	0.001	8.6e-05	global-S%QET	CASSLQETQYF	TCRBV28-01	TCRBJ02-05	NA	03/0912:T1D4_Tscm	1	-	-	-	-	-	-	-	-	-	-	-
2	S%QET	1.6e-16	15	18	8.6e-11	1	0.001	1	0.001	8.6e-05	global-S%QET	CASSLQETQYF	TCRBV07-06	TCRBJ02-05	NA	03/0912:T1D4_Tscm	1	-	-	-	-	-	-	-	-	-	-	-
2	S%QET	1.6e-16	15	18	8.6e-11	1	0.001	1	0.001	8.6e-05	global-S%QET	CASSLQETQYF	TCRBV07-09	TCRBJ02-05	NA	03/0912:T1D4_Tscm	1	-	-	-	-	-	-	-	-	-	-	-
2	S%QET	1.6e-16	15	18	8.6e-11	1	0.001	1	0.001	8.6e-05	global-S%QET	CASSLQETQYF	TCRBV12-03	TCRBJ02-05	NA	03/0912:T1D4_Tscm	1	-	-	-	-	-	-	-	-	-	-	-
2	S%QET	1.6e-16	15	18	8.6e-11	1	0.001	1	0.001	8.6e-05	global-S%QET	CASSLQETQYF	TCRBV14-01	TCRBJ02-05	NA	03/0913:T1D5_Tscm	1	-	-	-	-	-	-	-	-	-	-	-
2	S%QET	1.6e-16	15	18	8.6e-11	1	0.001	1	0.001	8.6e-05	global-S%QET	CASSLQETQYF	TCRBV03-01	TCRBJ02-05	NA	03/0913:T1D5_Tscm	1	-	-	-	-	-	-	-	-	-	-	-
2	S%QET	1.6e-16	15	18	8.6e-11	1	0.001	1	0.001	8.6e-05	global-S%QET	CASSLQETQYF	TCRBV05-01	TCRBJ02-05	NA	03/0913:T1D5_Tscm	1	-	-	-	-	-	-	-	-	-	-	-
2	S%QET	1.6e-16	15	18	8.6e-11	1	0.001	1	0.001	8.6e-05	global-S%QET	CASSLQETQYF	TCRBV05-04	TCRBJ02-05	NA	03/0914:T1D6_Tscm	1	-	-	-	-	-	-	-	-	-	-	-
2	S%QET	1.6e-16	15	18	8.6e-11	1	0.001	1	0.001	8.6e-05	global-S%QET	CASSLQETQYF	TCRBV05-01	TCRBJ02-05	NA	03/0914:T1D6_Tscm	1	-	-	-	-	-	-	-	-	-	-	-
2	S%QET	1.6e-16	15	18	8.6e-11	1	0.001	1	0.001	8.6e-05	global-S%QET	CASSLQETQYF	TCRBV12-03	TCRBJ02-05	NA	03/0914:T1D6_Tscm	1	-	-	-	-	-	-	-	-	-	-	-
2	S%QET	1.6e-16	15	18	8.6e-11	1	0.001	1	0.001	8.6e-05	global-S%QET	CASSLQETQYF	TCRBV05-01	TCRBJ02-05	NA	03/0915:T1D7_Tscm	1	-	-	-	-	-	-	-	-	-	-	-
2	S%QET	1.6e-16	15	18	8.6e-11	1	0.001	1	0.001	8.6e-05	global-S%QET	CASSLQETQYF	TCRBV28-01	TCRBJ02-05	NA	03/0915:T1D7_Tscm	1	-	-	-	-	-	-	-	-	-	-	-
2	S%QET	1.6e-16	15	18	8.6e-11	1	0.001	1	0.001	8.6e-05	global-S%QET	CASSLQETQYF	TCRBV18-01	TCRBJ02-05	NA	03/0915:T1D7_Tscm	1	-	-	-	-	-	-	-	-	-	-	-
2	S%QET	1.6e-16	15	18	8.6e-11	1	0.001	1	0.001	8.6e-05	global-S%QET	CASSLQETQYF	TCRBV02-01	TCRBJ02-05	NA	03/0915:T1D7_Tscm	1	-	-	-	-	-	-	-	-	-	-	-
2	S%QET	1.6e-16	15	18	8.6e-11	1	0.001	1	0.001	8.6e-05	global-S%QET	CASSLQETQYF	TCRBV07-09	TCRBJ02-05	NA	03/0915:T1D7_Tscm	1	-	-	-	-	-	-	-	-	-	-	-
2	S%QET	1.6e-16	15	18	8.6e-11	1	0.001	1	0.001	8.6e-05	global-S%QET	CASSYQETQYF	TCRBV12-03	TCRBJ02-05	NA	03/0902:HD2_Tscm	1	-	-	-	-	-	-	-	-	-	-	-
2	S%QET	1.6e-16	15	18	8.6e-11	1	0.001	1	0.001	8.6e-05	global-S%QET	CASSYQETQYF	TCRBV05-04	TCRBJ02-05	NA	03/0902:HD2_Tscm	1	-	-	-	-	-	-	-	-	-	-	-
2	S%QET	1.6e-16	15	18	8.6e-11	1	0.001	1	0.001	8.6e-05	global-S%QET	CASSYQETQYF	TCRBV06-05	TCRBJ02-05	NA	03/0902:HD2_Tscm	1	-	-	-	-	-	-	-	-	-	-	-
2	S%QET	1.6e-16	15	18	8.6e-11	1	0.001	1	0.001	8.6e-05	global-S%QET	CASSYQETQYF	TCRBV06-01	TCRBJ02-05	NA	03/0902:HD2_Tscm	1	-	-	-	-	-	-	-	-	-	-	-
2	S%QET	1.6e-16	15	18	8.6e-11	1	0.001	1	0.001	8.6e-05	global-S%QET	CASSYQETQYF	TCRBV06-02	TCRBJ02-05	NA	03/0902:HD2_Tscm	1	-	-	-	-	-	-	-	-	-	-	-
2	S%QET	1.6e-16	15	18	8.6e-11	1	0.001	1	0.001	8.6e-05	global-S%QET	CASSYQETQYF	TCRBV18-01	TCRBJ02-05	NA	03/0902:HD2_Tscm	1	-	-	-	-	-	-	-	-	-	-	-
2	S%QET	1.6e-16	15	18	8.6e-11	1	0.001	1	0.001	8.6e-05	global-S%QET	CASSYQETQYF	TCRBV02-01	TCRBJ02-05	NA	03/0902:HD2_Tscm	1	-	-	-	-	-	-	-	-	-	-	-
2	S%QET	1.6e-16	15	18	8.6e-11	1	0.001	1	0.001	8.6e-05	global-S%QET	CASSYQETQYF	TCRBV07-09	TCRBJ02-05	NA	03/0902:HD2_Tscm	1	-	-	-	-	-	-	-	-	-	-	-
2	S%QET	1.6e-16	15	18	8.6e-11	1	0.001	1	0.001	8.6e-05	global-S%QET	CASSYQETQYF	TCRBV06-06	TCRBJ02-05	NA	03/0902:HD2_Tscm	1	-	-	-	-	-	-	-	-	-	-	-
2	S%QET	1.6e-16	15	18	8.6e-11	1	0.001	1	0.001	8.6e-05	global-S%QET	CASSYQETQYF	TCRBV07-03	TCRBJ02-05	NA	03/0906:HD6_Tscm	1	-	-	-	-	-	-	-	-	-	-	-
2	S%QET	1.6e-16	15	18	8.6e-11	1	0.001	1	0.001	8.6e-05	global-S%QET	CASSYQETQYF	TCRBV28-01	TCRBJ02-05	NA	03/0906:HD6_Tscm	1	-	-	-	-	-	-	-	-	-	-	-
2	S%QET	1.6e-16	15	18	8.6e-11	1	0.001	1	0.001	8.6e-05	global-S%QET	CASSYQETQYF	TCRBV07-02	TCRBJ02-05	NA	03/0906:HD6_Tscm	1	-	-	-	-	-	-	-	-	-	-	-
2	S%QET	1.6e-16	15	18	8.6e-11	1	0.001	1	0.001	8.6e-05	global-S%QET	CASSYQETQYF	TCRBV14-01	TCRBJ02-05	NA	03/0906:HD6_Tscm	1	-	-	-	-	-	-	-	-	-	-	-
2	S%QET	1.6e-16	15	18	8.6e-11	1	0.001	1	0.001	8.6e-05	global-S%QET	CASSYQETQYF	TCRBV12-03	TCRBJ02-05	NA	03/0906:HD6_Tscm	1	-	-	-	-	-	-	-	-	-	-	-
2	S%QET	1.6e-16	15	18	8.6e-11	1	0.001	1	0.001	8.6e-05	global-S%QET	CASSYQETQYF	TCRBV07-09	TCRBJ02-05	NA	03/0906:HD6_Tscm	1	-	-	-	-	-	-	-	-	-	-	-
2	S%QET	1.6e-16	15	18	8.6e-11	1	0.001	1	0.001	8.6e-05	global-S%QET	CASSYQETQYF	TCRBV06-01	TCRBJ02-05	NA	03/0909:T1D1_Tscm	1	-	-	-	-	-	-	-	-	-	-	-
2	S%QET	1.6e-16	15	18	8.6e-11	1	0.001	1	0.001	8.6e-05	global-S%QET	CASSYQETQYF	TCRBV06-02	TCRBJ02-05	NA	03/0909:T1D1_Tscm	1	-	-	-	-	-	-	-	-	-	-	-
2	S%QET	1.6e-16	15	18	8.6e-11	1	0.001	1	0.001	8.6e-05	global-S%QET	CASSYQETQYF	TCRBV06-05	TCRBJ02-05	NA	03/0909:T1D1_Tscm	1	-	-	-	-	-	-	-	-	-	-	-
2	S%QET	1.6e-16	15	18	8.6e-11	1	0.001	1	0.001	8.6e-05	global-S%QET	CASSIQETQYF	TCRBV09-01	TCRBJ02-05	NA	03/0903:HD3_Tscm	1	-	-	-	-	-	-	-	-	-	-	-
2	S%QET	1.6e-16	15	18	8.6e-11	1	0.001	1	0.001	8.6e-05	global-S%QET	CASSIQETQYF	TCRBV05-06	TCRBJ02-05	NA	03/0903:HD3_Tscm	1	-	-	-	-	-	-	-	-	-	-	-
2	S%QET	1.6e-16	15	18	8.6e-11	1	0.001	1	0.001	8.6e-05	global-S%QET	CASSIQETQYF	TCRBV19-01	TCRBJ02-05	NA	03/0903:HD3_Tscm	1	-	-	-	-	-	-	-	-	-	-	-
2	S%QET	1.6e-16	15	18	8.6e-11	1	0.001	1	0.001	8.6e-05	global-S%QET	CASSIQETQYF	TCRBV13-01	TCRBJ02-05	NA	03/0903:HD3_Tscm	1	-	-	-	-	-	-	-	-	-	-	-
2	S%QET	1.6e-16	15	18	8.6e-11	1	0.001	1	0.001	8.6e-05	global-S%QET	CASSIQETQYF	TCRBV05-01	TCRBJ02-05	NA	03/0904:HD4_Tscm	1	-	-	-	-	-	-	-	-	-	-	-
2	S%QET	1.6e-16	15	18	8.6e-11	1	0.001	1	0.001	8.6e-05	global-S%QET	CASSIQETQYF	TCRBV18-01	TCRBJ02-05	NA	03/0904:HD4_Tscm	1	-	-	-	-	-	-	-	-	-	-	-
2	S%QET	1.6e-16	15	18	8.6e-11	1	0.001	1	0.001	8.6e-05	global-S%QET	CASSIQETQYF	TCRBV12-03	TCRBJ02-05	NA	03/0904:HD4_Tscm	1	-	-	-	-	-	-	-	-	-	-	-
2	S%QET	1.6e-16	15	18	8.6e-11	1	0.001	1	0.001	8.6e-05	global-S%QET	CASSIQETQYF	TCRBV07-02	TCRBJ02-05	NA	03/0906:HD6_Tscm	1	-	-	-	-	-	-	-	-	-	-	-
2	S%QET	1.6e-16	15	18	8.6e-11	1	0.001	1	0.001	8.6e-05	global-S%QET	CASSIQETQYF	TCRBV11-02	TCRBJ02-05	NA	03/0906:HD6_Tscm	1	-	-	-	-	-	-	-	-	-	-	-
2	S%QET	1.6e-16	15	18	8.6e-11	1	0.001	1	0.001	8.6e-05	global-S%QET	CASSIQETQYF	TCRBV03-01	TCRBJ02-05	NA	03/0906:HD6_Tscm	1	-	-	-	-	-	-	-	-	-	-	-
2	S%QET	1.6e-16	15	18	8.6e-11	1	0.001	1	0.001	8.6e-05	global-S%QET	CASSIQETQYF	TCRBV05-01	TCRBJ02-05	NA	03/0906:HD6_Tscm	1	-	-	-	-	-	-	-	-	-	-	-
2	S%QET	1.6e-16	15	18	8.6e-11	1	0.001	1	0.001	8.6e-05	global-S%QET	CASSIQETQYF	TCRBV18-01	TCRBJ02-05	NA	03/0906:HD6_Tscm	1	-	-	-	-	-	-	-	-	-	-	-
2	S%QET	1.6e-16	15	18	8.6e-11	1	0.001	1	0.001	8.6e-05	global-S%QET	CASSIQETQYF	TCRBV07-09	TCRBJ02-05	NA	03/0906:HD6_Tscm	1	-	-	-	-	-	-	-	-	-	-	-
2	S%QET	1.6e-16	15	18	8.6e-11	1	0.001	1	0.001	8.6e-05	global-S%QET	CASSIQETQYF	TCRBV19-01	TCRBJ02-05	NA	03/0910:T1D2_Tscm	1	-	-	-	-	-	-	-	-	-	-	-
2	S%QET	1.6e-16	15	18	8.6e-11	1	0.001	1	0.001	8.6e-05	global-S%QET	CASSIQETQYF	TCRBV07-08	TCRBJ02-05	NA	03/0911:T1D3_Tscm	1	-	-	-	-	-	-	-	-	-	-	-
2	S%QET	1.6e-16	15	18	8.6e-11	1	0.001	1	0.001	8.6e-05	global-S%QET	CASSIQETQYF	TCRBV07-03	TCRBJ02-05	NA	03/0911:T1D3_Tscm	1	-	-	-	-	-	-	-	-	-	-	-
2	S%QET	1.6e-16	15	18	8.6e-11	1	0.001	1	0.001	8.6e-05	global-S%QET	CASSIQETQYF	TCRBV07-09	TCRBJ02-05	NA	03/0911:T1D3_Tscm	1	-	-	-	-	-	-	-	-	-	-	-
2	S%QET	1.6e-16	15	18	8.6e-11	1	0.001	1	0.001	8.6e-05	global-S%QET	CASSIQETQYF	TCRBV05-01	TCRBJ02-05	NA	03/0911:T1D3_Tscm	1	-	-	-	-	-	-	-	-	-	-	-
2	S%QET	1.6e-16	15	18	8.6e-11	1	0.001	1	0.001	8.6e-05	global-S%QET	CASSIQETQYF	TCRBV07-02	TCRBJ02-05	NA	03/0911:T1D3_Tscm	1	-	-	-	-	-	-	-	-	-	-	-
2	S%QET	1.6e-16	15	18	8.6e-11	1	0.001	1	0.001	8.6e-05	global-S%QET	CASSTQETQYF	TCRBV19-01	TCRBJ02-05	NA	03/0903:HD3_Tscm	1	-	-	-	-	-	-	-	-	-	-	-
2	S%QET	1.6e-16	15	18	8.6e-11	1	0.001	1	0.001	8.6e-05	global-S%QET	CASSTQETQYF	TCRBV18-01	TCRBJ02-05	NA	03/0903:HD3_Tscm	1	-	-	-	-	-	-	-	-	-	-	-
2	S%QET	1.6e-16	15	18	8.6e-11	1	0.001	1	0.001	8.6e-05	global-S%QET	CASSTQETQYF	TCRBV05-01	TCRBJ02-05	NA	03/0906:HD6_Tscm	1	-	-	-	-	-	-	-	-	-	-	-
2	S%QET	1.6e-16	15	18	8.6e-11	1	0.001	1	0.001	8.6e-05	global-S%QET	CASSTQETQYF	TCRBV12-03	TCRBJ02-05	NA	03/0906:HD6_Tscm	1	-	-	-	-	-	-	-	-	-	-	-
2	S%QET	1.6e-16	15	18	8.6e-11	1	0.001	1	0.001	8.6e-05	global-S%QET	CASSTQETQYF	TCRBV28-01	TCRBJ02-05	NA	03/0906:HD6_Tscm	1	-	-	-	-	-	-	-	-	-	-	-
2	S%QET	1.6e-16	15	18	8.6e-11	1	0.001	1	0.001	8.6e-05	global-S%QET	CASSTQETQYF	TCRBV07-02	TCRBJ02-05	NA	03/0909:T1D1_Tscm	1	-	-	-	-	-	-	-	-	-	-	-
2	S%QET	1.6e-16	15	18	8.6e-11	1	0.001	1	0.001	8.6e-05	global-S%QET	CASSTQETQYF	TCRBV18-01	TCRBJ02-05	NA	03/0909:T1D1_Tscm	1	-	-	-	-	-	-	-	-	-	-	-
2	S%QET	1.6e-16	15	18	8.6e-11	1	0.001	1	0.001	8.6e-05	global-S%QET	CASSTQETQYF	TCRBV12-03	TCRBJ02-05	NA	03/0909:T1D1_Tscm	1	-	-	-	-	-	-	-	-	-	-	-
2	S%QET	1.6e-16	15	18	8.6e-11	1	0.001	1	0.001	8.6e-05	global-S%QET	CASSVQETQYF	TCRBV04-02	TCRBJ02-05	NA	03/0902:HD2_Tscm	1	-	-	-	-	-	-	-	-	-	-	-
2	S%QET	1.6e-16	15	18	8.6e-11	1	0.001	1	0.001	8.6e-05	global-S%QET	CASSVQETQYF	TCRBV05-01	TCRBJ02-05	NA	03/0902:HD2_Tscm	1	-	-	-	-	-	-	-	-	-	-	-
2	S%QET	1.6e-16	15	18	8.6e-11	1	0.001	1	0.001	8.6e-05	global-S%QET	CASSVQETQYF	TCRBV07-09	TCRBJ02-05	NA	03/0902:HD2_Tscm	1	-	-	-	-	-	-	-	-	-	-	-
2	S%QET	1.6e-16	15	18	8.6e-11	1	0.001	1	0.001	8.6e-05	global-S%QET	CASSVQETQYF	TCRBV07-06	TCRBJ02-05	NA	03/0906:HD6_Tscm	1	-	-	-	-	-	-	-	-	-	-	-
2	S%QET	1.6e-16	15	18	8.6e-11	1	0.001	1	0.001	8.6e-05	global-S%QET	CASSVQETQYF	TCRBV05-01	TCRBJ02-05	NA	03/0906:HD6_Tscm	1	-	-	-	-	-	-	-	-	-	-	-
2	S%QET	1.6e-16	15	18	8.6e-11	1	0.001	1	0.001	8.6e-05	global-S%QET	CASSVQETQYF	TCRBV02-01	TCRBJ02-05	NA	03/0906:HD6_Tscm	1	-	-	-	-	-	-	-	-	-	-	-
2	S%QET	1.6e-16	15	18	8.6e-11	1	0.001	1	0.001	8.6e-05	global-S%QET	CASSEQETQYF	TCRBV06-05	TCRBJ02-05	NA	03/0902:HD2_Tscm	1	-	-	-	-	-	-	-	-	-	-	-
2	S%QET	1.6e-16	15	18	8.6e-11	1	0.001	1	0.001	8.6e-05	global-S%QET	CASSEQETQYF	TCRBV06-06	TCRBJ02-05	NA	03/0902:HD2_Tscm	1	-	-	-	-	-	-	-	-	-	-	-
2	S%QET	1.6e-16	15	18	8.6e-11	1	0.001	1	0.001	8.6e-05	global-S%QET	CASSEQETQYF	TCRBV07-09	TCRBJ02-05	NA	03/0902:HD2_Tscm	1	-	-	-	-	-	-	-	-	-	-	-
2	S%QET	1.6e-16	15	18	8.6e-11	1	0.001	1	0.001	8.6e-05	global-S%QET	CASSEQETQYF	TCRBV02-01	TCRBJ02-05	NA	03/0902:HD2_Tscm	1	-	-	-	-	-	-	-	-	-	-	-
2	S%QET	1.6e-16	15	18	8.6e-11	1	0.001	1	0.001	8.6e-05	global-S%QET	CASSEQETQYF	TCRBV07-02	TCRBJ02-05	NA	03/0902:HD2_Tscm	1	-	-	-	-	-	-	-	-	-	-	-
2	S%QET	1.6e-16	15	18	8.6e-11	1	0.001	1	0.001	8.6e-05	global-S%QET	CASSDQETQYF	TCRBV07-09	TCRBJ02-05	NA	03/0915:T1D7_Tscm	1	-	-	-	-	-	-	-	-	-	-	-
2	S%QET	1.6e-16	15	18	8.6e-11	1	0.001	1	0.001	8.6e-05	global-S%QET	CASSDQETQYF	TCRBV05-01	TCRBJ02-05	NA	03/0915:T1D7_Tscm	1	-	-	-	-	-	-	-	-	-	-	-
2	S%QET	1.6e-16	15	18	8.6e-11	1	0.001	1	0.001	8.6e-05	global-S%QET	CASSQQETQYF	TCRBV05-05	TCRBJ02-05	NA	03/0902:HD2_Tscm	1	-	-	-	-	-	-	-	-	-	-	-
2	S%QET	1.6e-16	15	18	8.6e-11	1	0.001	1	0.001	8.6e-05	global-S%QET	CASSQQETQYF	TCRBV19-01	TCRBJ02-05	NA	03/0902:HD2_Tscm	1	-	-	-	-	-	-	-	-	-	-	-
2	S%QET	1.6e-16	15	18	8.6e-11	1	0.001	1	0.001	8.6e-05	global-S%QET	CASSQQETQYF	TCRBV03-01	TCRBJ02-05	NA	03/0902:HD2_Tscm	1	-	-	-	-	-	-	-	-	-	-	-
2	S%QET	1.6e-16	15	18	8.6e-11	1	0.001	1	0.001	8.6e-05	global-S%QET	CASSQQETQYF	TCRBV12-03	TCRBJ02-05	NA	03/0902:HD2_Tscm	1	-	-	-	-	-	-	-	-	-	-	-
2	S%QET	1.6e-16	15	18	8.6e-11	1	0.001	1	0.001	8.6e-05	global-S%QET	CASSQQETQYF	TCRBV14-01	TCRBJ02-05	NA	03/0903:HD3_Tscm	1	-	-	-	-	-	-	-	-	-	-	-
2	S%QET	1.6e-16	15	18	8.6e-11	1	0.001	1	0.001	8.6e-05	global-S%QET	CASSQQETQYF	TCRBV18-01	TCRBJ02-05	NA	03/0903:HD3_Tscm	1	-	-	-	-	-	-	-	-	-	-	-
2	S%QET	1.6e-16	15	18	8.6e-11	1	0.001	1	0.001	8.6e-05	global-S%QET	CASSQQETQYF	TCRBV07-09	TCRBJ02-01	NA	03/0906:HD6_Tscm	1	-	-	-	-	-	-	-	-	-	-	-
2	S%QET	1.6e-16	15	18	8.6e-11	1	0.001	1	0.001	8.6e-05	global-S%QET	CASSQQETQYF	TCRBV05-04	TCRBJ02-05	NA	03/0906:HD6_Tscm	1	-	-	-	-	-	-	-	-	-	-	-
2	S%QET	1.6e-16	15	18	8.6e-11	1	0.001	1	0.001	8.6e-05	global-S%QET	CASSQQETQYF	TCRBV07-09	TCRBJ02-05	NA	03/0906:HD6_Tscm	1	-	-	-	-	-	-	-	-	-	-	-
2	S%QET	1.6e-16	15	18	8.6e-11	1	0.001	1	0.001	8.6e-05	global-S%QET	CASSQQETQYF	TCRBV07-09	TCRBJ02-05	NA	03/0909:T1D1_Tscm	1	-	-	-	-	-	-	-	-	-	-	-
2	S%QET	1.6e-16	15	18	8.6e-11	1	0.001	1	0.001	8.6e-05	global-S%QET	CASSQQETQYF	TCRBV05-01	TCRBJ02-05	NA	03/0912:T1D4_Tscm	1	-	-	-	-	-	-	-	-	-	-	-
2	S%QET	1.6e-16	15	18	8.6e-11	1	0.001	1	0.001	8.6e-05	global-S%QET	CASSQQETQYF	TCRBV07-06	TCRBJ02-05	NA	03/0912:T1D4_Tscm	1	-	-	-	-	-	-	-	-	-	-	-
2	S%QET	1.6e-16	15	18	8.6e-11	1	0.001	1	0.001	8.6e-05	global-S%QET	CASSQQETQYF	TCRBV03-01	TCRBJ02-05	NA	03/0912:T1D4_Tscm	1	-	-	-	-	-	-	-	-	-	-	-
2	S%QET	1.6e-16	15	18	8.6e-11	1	0.001	1	0.001	8.6e-05	global-S%QET	CASSQQETQYF	TCRBV12-03	TCRBJ02-05	NA	03/0912:T1D4_Tscm	1	-	-	-	-	-	-	-	-	-	-	-
2	S%QET	1.6e-16	15	18	8.6e-11	1	0.001	1	0.001	8.6e-05	global-S%QET	CASSQQETQYF	TCRBV07-02	TCRBJ02-05	NA	03/0913:T1D5_Tscm	1	-	-	-	-	-	-	-	-	-	-	-
2	S%QET	1.6e-16	15	18	8.6e-11	1	0.001	1	0.001	8.6e-05	global-S%QET	CAWSGQETQYF	TCRBV30-01	TCRBJ02-05	NA	03/0907:HD7_Tscm	1	-	-	-	-	-	-	-	-	-	-	-
2	S%QET	1.6e-16	15	18	8.6e-11	1	0.001	1	0.001	8.6e-05	global-S%QET	CASSSQETQYF	TCRBV05-06	TCRBJ02-05	NA	03/0902:HD2_Tscm	1	-	-	-	-	-	-	-	-	-	-	-
2	S%QET	1.6e-16	15	18	8.6e-11	1	0.001	1	0.001	8.6e-05	global-S%QET	CASSSQETQYF	TCRBV06-05	TCRBJ02-05	NA	03/0902:HD2_Tscm	1	-	-	-	-	-	-	-	-	-	-	-
2	S%QET	1.6e-16	15	18	8.6e-11	1	0.001	1	0.001	8.6e-05	global-S%QET	CASSSQETQYF	TCRBV07-02	TCRBJ02-05	NA	03/0902:HD2_Tscm	1	-	-	-	-	-	-	-	-	-	-	-
2	S%QET	1.6e-16	15	18	8.6e-11	1	0.001	1	0.001	8.6e-05	global-S%QET	CASSSQETQYF	TCRBV06-02	TCRBJ02-05	NA	03/0902:HD2_Tscm	1	-	-	-	-	-	-	-	-	-	-	-
2	S%QET	1.6e-16	15	18	8.6e-11	1	0.001	1	0.001	8.6e-05	global-S%QET	CASSSQETQYF	TCRBV02-01	TCRBJ02-05	NA	03/0902:HD2_Tscm	1	-	-	-	-	-	-	-	-	-	-	-
2	S%QET	1.6e-16	15	18	8.6e-11	1	0.001	1	0.001	8.6e-05	global-S%QET	CASSSQETQYF	TCRBV07-08	TCRBJ02-05	NA	03/0902:HD2_Tscm	1	-	-	-	-	-	-	-	-	-	-	-
2	S%QET	1.6e-16	15	18	8.6e-11	1	0.001	1	0.001	8.6e-05	global-S%QET	CASSSQETQYF	TCRBV14-01	TCRBJ02-05	NA	03/0902:HD2_Tscm	1	-	-	-	-	-	-	-	-	-	-	-
2	S%QET	1.6e-16	15	18	8.6e-11	1	0.001	1	0.001	8.6e-05	global-S%QET	CASSSQETQYF	TCRBV05-01	TCRBJ02-05	NA	03/0902:HD2_Tscm	1	-	-	-	-	-	-	-	-	-	-	-
2	S%QET	1.6e-16	15	18	8.6e-11	1	0.001	1	0.001	8.6e-05	global-S%QET	CASSSQETQYF	TCRBV18-01	TCRBJ02-05	NA	03/0902:HD2_Tscm	1	-	-	-	-	-	-	-	-	-	-	-
2	S%QET	1.6e-16	15	18	8.6e-11	1	0.001	1	0.001	8.6e-05	global-S%QET	CASSSQETQYF	TCRBV07-09	TCRBJ02-05	NA	03/0902:HD2_Tscm	1	-	-	-	-	-	-	-	-	-	-	-
2	S%QET	1.6e-16	15	18	8.6e-11	1	0.001	1	0.001	8.6e-05	global-S%QET	CASSSQETQYF	TCRBV11-02	TCRBJ02-05	NA	03/0902:HD2_Tscm	1	-	-	-	-	-	-	-	-	-	-	-
2	S%QET	1.6e-16	15	18	8.6e-11	1	0.001	1	0.001	8.6e-05	global-S%QET	CASSSQETQYF	TCRBV11-02	TCRBJ02-05	NA	03/0906:HD6_Tscm	1	-	-	-	-	-	-	-	-	-	-	-
2	S%QET	1.6e-16	15	18	8.6e-11	1	0.001	1	0.001	8.6e-05	global-S%QET	CASSSQETQYF	TCRBV06-06	TCRBJ02-05	NA	03/0906:HD6_Tscm	1	-	-	-	-	-	-	-	-	-	-	-
2	S%QET	1.6e-16	15	18	8.6e-11	1	0.001	1	0.001	8.6e-05	global-S%QET	CASSSQETQYF	TCRBV02-01	TCRBJ02-05	NA	03/0906:HD6_Tscm	1	-	-	-	-	-	-	-	-	-	-	-
2	S%QET	1.6e-16	15	18	8.6e-11	1	0.001	1	0.001	8.6e-05	global-S%QET	CASSSQETQYF	TCRBV05-06	TCRBJ02-05	NA	03/0906:HD6_Tscm	1	-	-	-	-	-	-	-	-	-	-	-
2	S%QET	1.6e-16	15	18	8.6e-11	1	0.001	1	0.001	8.6e-05	global-S%QET	CASSSQETQYF	TCRBV05-04	TCRBJ02-05	NA	03/0906:HD6_Tscm	1	-	-	-	-	-	-	-	-	-	-	-
2	S%QET	1.6e-16	15	18	8.6e-11	1	0.001	1	0.001	8.6e-05	global-S%QET	CASSSQETQYF	TCRBV07-02	TCRBJ02-05	NA	03/0906:HD6_Tscm	1	-	-	-	-	-	-	-	-	-	-	-
2	S%QET	1.6e-16	15	18	8.6e-11	1	0.001	1	0.001	8.6e-05	global-S%QET	CASSSQETQYF	TCRBV07-09	TCRBJ02-05	NA	03/0906:HD6_Tscm	1	-	-	-	-	-	-	-	-	-	-	-
2	S%QET	1.6e-16	15	18	8.6e-11	1	0.001	1	0.001	8.6e-05	global-S%QET	CASSSQETQYF	TCRBV18-01	TCRBJ02-05	NA	03/0906:HD6_Tscm	1	-	-	-	-	-	-	-	-	-	-	-
2	S%QET	1.6e-16	15	18	8.6e-11	1	0.001	1	0.001	8.6e-05	global-S%QET	CASSSQETQYF	TCRBV05-01	TCRBJ02-05	NA	03/0906:HD6_Tscm	1	-	-	-	-	-	-	-	-	-	-	-
2	S%QET	1.6e-16	15	18	8.6e-11	1	0.001	1	0.001	8.6e-05	global-S%QET	CASSSQETQYF	TCRBV07-06	TCRBJ02-05	NA	03/0907:HD7_Tscm	1	-	-	-	-	-	-	-	-	-	-	-
2	S%QET	1.6e-16	15	18	8.6e-11	1	0.001	1	0.001	8.6e-05	global-S%QET	CASSSQETQYF	TCRBV11-01	TCRBJ02-05	NA	03/0907:HD7_Tscm	1	-	-	-	-	-	-	-	-	-	-	-
2	S%QET	1.6e-16	15	18	8.6e-11	1	0.001	1	0.001	8.6e-05	global-S%QET	CASSSQETQYF	TCRBV07-09	TCRBJ02-05	NA	03/0907:HD7_Tscm	1	-	-	-	-	-	-	-	-	-	-	-
2	S%QET	1.6e-16	15	18	8.6e-11	1	0.001	1	0.001	8.6e-05	global-S%QET	CASSSQETQYF	TCRBV18-01	TCRBJ02-05	NA	03/0907:HD7_Tscm	1	-	-	-	-	-	-	-	-	-	-	-
2	S%QET	1.6e-16	15	18	8.6e-11	1	0.001	1	0.001	8.6e-05	global-S%QET	CASSSQETQYF	TCRBV05-04	TCRBJ02-05	NA	03/0907:HD7_Tscm	1	-	-	-	-	-	-	-	-	-	-	-
2	S%QET	1.6e-16	15	18	8.6e-11	1	0.001	1	0.001	8.6e-05	global-S%QET	CASSSQETQYF	TCRBV27-01	TCRBJ02-05	NA	03/0907:HD7_Tscm	1	-	-	-	-	-	-	-	-	-	-	-
2	S%QET	1.6e-16	15	18	8.6e-11	1	0.001	1	0.001	8.6e-05	global-S%QET	CASSSQETQYF	TCRBV11-03	TCRBJ02-05	NA	03/0907:HD7_Tscm	1	-	-	-	-	-	-	-	-	-	-	-
2	S%QET	1.6e-16	15	18	8.6e-11	1	0.001	1	0.001	8.6e-05	global-S%QET	CASSSQETQYF	TCRBV06-06	TCRBJ02-05	NA	03/0907:HD7_Tscm	1	-	-	-	-	-	-	-	-	-	-	-
2	S%QET	1.6e-16	15	18	8.6e-11	1	0.001	1	0.001	8.6e-05	global-S%QET	CASSSQETQYF	TCRBV02-01	TCRBJ02-05	NA	03/0907:HD7_Tscm	1	-	-	-	-	-	-	-	-	-	-	-
2	S%QET	1.6e-16	15	18	8.6e-11	1	0.001	1	0.001	8.6e-05	global-S%QET	CASSSQETQYF	TCRBV05-01	TCRBJ02-05	NA	03/0907:HD7_Tscm	1	-	-	-	-	-	-	-	-	-	-	-
2	S%QET	1.6e-16	15	18	8.6e-11	1	0.001	1	0.001	8.6e-05	global-S%QET	CASSSQETQYF	TCRBV09-01	TCRBJ02-05	NA	03/0907:HD7_Tscm	1	-	-	-	-	-	-	-	-	-	-	-
2	S%QET	1.6e-16	15	18	8.6e-11	1	0.001	1	0.001	8.6e-05	global-S%QET	CASSSQETQYF	TCRBV05-01	TCRBJ02-05	NA	03/0909:T1D1_Tscm	1	-	-	-	-	-	-	-	-	-	-	-
2	S%QET	1.6e-16	15	18	8.6e-11	1	0.001	1	0.001	8.6e-05	global-S%QET	CASSSQETQYF	TCRBV18-01	TCRBJ02-05	NA	03/0909:T1D1_Tscm	1	-	-	-	-	-	-	-	-	-	-	-
2	S%QET	1.6e-16	15	18	8.6e-11	1	0.001	1	0.001	8.6e-05	global-S%QET	CASSSQETQYF	TCRBV07-02	TCRBJ02-05	NA	03/0909:T1D1_Tscm	1	-	-	-	-	-	-	-	-	-	-	-
2	S%QET	1.6e-16	15	18	8.6e-11	1	0.001	1	0.001	8.6e-05	global-S%QET	CASSSQETQYF	TCRBV05-01	TCRBJ02-05	NA	03/0910:T1D2_Tscm	1	-	-	-	-	-	-	-	-	-	-	-
2	S%QET	1.6e-16	15	18	8.6e-11	1	0.001	1	0.001	8.6e-05	global-S%QET	CASSSQETQYF	TCRBV28-01	TCRBJ02-05	NA	03/0910:T1D2_Tscm	1	-	-	-	-	-	-	-	-	-	-	-
2	S%QET	1.6e-16	15	18	8.6e-11	1	0.001	1	0.001	8.6e-05	global-S%QET	CASSSQETQYF	TCRBV11-03	TCRBJ02-05	NA	03/0911:T1D3_Tscm	1	-	-	-	-	-	-	-	-	-	-	-
2	S%QET	1.6e-16	15	18	8.6e-11	1	0.001	1	0.001	8.6e-05	global-S%QET	CASSSQETQYF	TCRBV07-02	TCRBJ02-05	NA	03/0911:T1D3_Tscm	1	-	-	-	-	-	-	-	-	-	-	-
2	S%QET	1.6e-16	15	18	8.6e-11	1	0.001	1	0.001	8.6e-05	global-S%QET	CASSSQETQYF	TCRBV07-06	TCRBJ02-05	NA	03/0911:T1D3_Tscm	1	-	-	-	-	-	-	-	-	-	-	-
2	S%QET	1.6e-16	15	18	8.6e-11	1	0.001	1	0.001	8.6e-05	global-S%QET	CASSSQETQYF	TCRBV07-03	TCRBJ02-05	NA	03/0911:T1D3_Tscm	1	-	-	-	-	-	-	-	-	-	-	-
2	S%QET	1.6e-16	15	18	8.6e-11	1	0.001	1	0.001	8.6e-05	global-S%QET	CASSSQETQYF	TCRBV05-01	TCRBJ02-05	NA	03/0911:T1D3_Tscm	1	-	-	-	-	-	-	-	-	-	-	-
2	S%QET	1.6e-16	15	18	8.6e-11	1	0.001	1	0.001	8.6e-05	global-S%QET	CASSSQETQYF	TCRBV07-09	TCRBJ02-05	NA	03/0911:T1D3_Tscm	1	-	-	-	-	-	-	-	-	-	-	-
2	S%QET	1.6e-16	15	18	8.6e-11	1	0.001	1	0.001	8.6e-05	global-S%QET	CASSSQETQYF	TCRBV12-03	TCRBJ02-05	NA	03/0912:T1D4_Tscm	1	-	-	-	-	-	-	-	-	-	-	-
2	S%QET	1.6e-16	15	18	8.6e-11	1	0.001	1	0.001	8.6e-05	global-S%QET	CASSSQETQYF	TCRBV05-01	TCRBJ02-05	NA	03/0912:T1D4_Tscm	1	-	-	-	-	-	-	-	-	-	-	-
2	S%QET	1.6e-16	15	18	8.6e-11	1	0.001	1	0.001	8.6e-05	global-S%QET	CASSSQETQYF	TCRBV05-04	TCRBJ02-05	NA	03/0912:T1D4_Tscm	1	-	-	-	-	-	-	-	-	-	-	-
2	S%QET	1.6e-16	15	18	8.6e-11	1	0.001	1	0.001	8.6e-05	global-S%QET	CASSSQETQYF	TCRBV06-06	TCRBJ02-05	NA	03/0912:T1D4_Tscm	1	-	-	-	-	-	-	-	-	-	-	-
2	S%QET	1.6e-16	15	18	8.6e-11	1	0.001	1	0.001	8.6e-05	global-S%QET	CASSSQETQYF	TCRBV18-01	TCRBJ02-05	NA	03/0915:T1D7_Tscm	1	-	-	-	-	-	-	-	-	-	-	-
2	S%QET	1.6e-16	15	18	8.6e-11	1	0.001	1	0.001	8.6e-05	global-S%QET	CASSSQETQYF	TCRBV05-01	TCRBJ02-05	NA	03/0915:T1D7_Tscm	1	-	-	-	-	-	-	-	-	-	-	-
2	S%QET	1.6e-16	15	18	8.6e-11	1	0.001	1	0.001	8.6e-05	global-S%QET	CASSSQETQYF	TCRBV07-02	TCRBJ02-05	NA	03/0915:T1D7_Tscm	1	-	-	-	-	-	-	-	-	-	-	-
2	S%QET	1.6e-16	15	18	8.6e-11	1	0.001	1	0.001	8.6e-05	global-S%QET	CASSSQETQYF	TCRBV18-01	TCRBJ02-05	NA	03/0916:T1D8_Tscm	1	-	-	-	-	-	-	-	-	-	-	-
2	S%QET	1.6e-16	15	18	8.6e-11	1	0.001	1	0.001	8.6e-05	global-S%QET	CASSAQETQYF	TCRBV11-03	TCRBJ02-05	NA	03/0902:HD2_Tscm	1	-	-	-	-	-	-	-	-	-	-	-
2	S%QET	1.6e-16	15	18	8.6e-11	1	0.001	1	0.001	8.6e-05	global-S%QET	CASSAQETQYF	TCRBV07-09	TCRBJ02-05	NA	03/0902:HD2_Tscm	1	-	-	-	-	-	-	-	-	-	-	-
2	S%QET	1.6e-16	15	18	8.6e-11	1	0.001	1	0.001	8.6e-05	global-S%QET	CASSAQETQYF	TCRBV11-02	TCRBJ02-05	NA	03/0902:HD2_Tscm	1	-	-	-	-	-	-	-	-	-	-	-
2	S%QET	1.6e-16	15	18	8.6e-11	1	0.001	1	0.001	8.6e-05	global-S%QET	CASSAQETQYF	TCRBV07-02	TCRBJ02-05	NA	03/0902:HD2_Tscm	1	-	-	-	-	-	-	-	-	-	-	-
2	S%QET	1.6e-16	15	18	8.6e-11	1	0.001	1	0.001	8.6e-05	global-S%QET	CAISSQETQYF	TCRBV10-03	TCRBJ02-05	NA	03/0901:HD1_Tscm	1	-	-	-	-	-	-	-	-	-	-	-
2	S%QET	1.6e-16	15	18	8.6e-11	1	0.001	1	0.001	8.6e-05	global-S%QET	CASSNQETQYF	TCRBV05-06	TCRBJ02-05	NA	03/0902:HD2_Tscm	1	-	-	-	-	-	-	-	-	-	-	-
2	S%QET	1.6e-16	15	18	8.6e-11	1	0.001	1	0.001	8.6e-05	global-S%QET	CASSNQETQYF	TCRBV18-01	TCRBJ02-05	NA	03/0902:HD2_Tscm	1	-	-	-	-	-	-	-	-	-	-	-
2	S%QET	1.6e-16	15	18	8.6e-11	1	0.001	1	0.001	8.6e-05	global-S%QET	CASSNQETQYF	TCRBV07-02	TCRBJ02-05	NA	03/0902:HD2_Tscm	1	-	-	-	-	-	-	-	-	-	-	-
2	S%QET	1.6e-16	15	18	8.6e-11	1	0.001	1	0.001	8.6e-05	global-S%QET	CASSNQETQYF	TCRBV04-03	TCRBJ02-05	NA	03/0902:HD2_Tscm	1	-	-	-	-	-	-	-	-	-	-	-
2	S%QET	1.6e-16	15	18	8.6e-11	1	0.001	1	0.001	8.6e-05	global-S%QET	CASSNQETQYF	TCRBV11-03	TCRBJ02-05	NA	03/0902:HD2_Tscm	1	-	-	-	-	-	-	-	-	-	-	-
2	S%QET	1.6e-16	15	18	8.6e-11	1	0.001	1	0.001	8.6e-05	global-S%QET	CASSNQETQYF	TCRBV07-09	TCRBJ02-05	NA	03/0902:HD2_Tscm	1	-	-	-	-	-	-	-	-	-	-	-
2	S%QET	1.6e-16	15	18	8.6e-11	1	0.001	1	0.001	8.6e-05	global-S%QET	CASSRQETQYF	TCRBV06-02	TCRBJ02-05	NA	03/0901:HD1_Tscm	1	-	-	-	-	-	-	-	-	-	-	-
2	S%QET	1.6e-16	15	18	8.6e-11	1	0.001	1	0.001	8.6e-05	global-S%QET	CASSRQETQYF	TCRBV18-01	TCRBJ02-05	NA	03/0901:HD1_Tscm	1	-	-	-	-	-	-	-	-	-	-	-
2	S%QET	1.6e-16	15	18	8.6e-11	1	0.001	1	0.001	8.6e-05	global-S%QET	CASSRQETQYF	TCRBV05-01	TCRBJ02-05	NA	03/0906:HD6_Tscm	1	-	-	-	-	-	-	-	-	-	-	-
2	S%QET	1.6e-16	15	18	8.6e-11	1	0.001	1	0.001	8.6e-05	global-S%QET	CASSRQETQYF	TCRBV06-06	TCRBJ02-05	NA	03/0906:HD6_Tscm	1	-	-	-	-	-	-	-	-	-	-	-
2	S%QET	1.6e-16	15	18	8.6e-11	1	0.001	1	0.001	8.6e-05	global-S%QET	CASSRQETQYF	TCRBV18-01	TCRBJ02-05	NA	03/0906:HD6_Tscm	1	-	-	-	-	-	-	-	-	-	-	-
2	S%QET	1.6e-16	15	18	8.6e-11	1	0.001	1	0.001	8.6e-05	global-S%QET	CASSRQETQYF	TCRBV06-05	TCRBJ02-05	NA	03/0906:HD6_Tscm	1	-	-	-	-	-	-	-	-	-	-	-
2	S%QET	1.6e-16	15	18	8.6e-11	1	0.001	1	0.001	8.6e-05	global-S%QET	CASSRQETQYF	TCRBV12-03	TCRBJ02-05	NA	03/0906:HD6_Tscm	1	-	-	-	-	-	-	-	-	-	-	-
2	S%QET	1.6e-16	15	18	8.6e-11	1	0.001	1	0.001	8.6e-05	global-S%QET	CASSRQETQYF	TCRBV11-03	TCRBJ02-05	NA	03/0912:T1D4_Tscm	1	-	-	-	-	-	-	-	-	-	-	-
2	S%QET	1.6e-16	15	18	8.6e-11	1	0.001	1	0.001	8.6e-05	global-S%QET	CASSRQETQYF	TCRBV18-01	TCRBJ02-05	NA	03/0912:T1D4_Tscm	1	-	-	-	-	-	-	-	-	-	-	-
2	S%QET	1.6e-16	15	18	8.6e-11	1	0.001	1	0.001	8.6e-05	global-S%QET	CASSRQETQYF	TCRBV07-09	TCRBJ02-05	NA	03/0912:T1D4_Tscm	1	-	-	-	-	-	-	-	-	-	-	-
2	S%QET	1.6e-16	15	18	8.6e-11	1	0.001	1	0.001	8.6e-05	global-S%QET	CASSHQETQYF	TCRBV09-01	TCRBJ02-05	NA	03/0903:HD3_Tscm	1	-	-	-	-	-	-	-	-	-	-	-
2	S%QET	1.6e-16	15	18	8.6e-11	1	0.001	1	0.001	8.6e-05	global-S%QET	CASSHQETQYF	TCRBV11-02	TCRBJ02-05	NA	03/0903:HD3_Tscm	1	-	-	-	-	-	-	-	-	-	-	-
2	S%QET	1.6e-16	15	18	8.6e-11	1	0.001	1	0.001	8.6e-05	global-S%QET	CASSHQETQYF	TCRBV07-09	TCRBJ02-05	NA	03/0903:HD3_Tscm	1	-	-	-	-	-	-	-	-	-	-	-
2	S%QET	1.6e-16	15	18	8.6e-11	1	0.001	1	0.001	8.6e-05	global-S%QET	CASSHQETQYF	TCRBV18-01	TCRBJ02-05	NA	03/0906:HD6_Tscm	1	-	-	-	-	-	-	-	-	-	-	-
2	S%QET	1.6e-16	15	18	8.6e-11	1	0.001	1	0.001	8.6e-05	global-S%QET	CASSHQETQYF	TCRBV05-04	TCRBJ02-05	NA	03/0906:HD6_Tscm	1	-	-	-	-	-	-	-	-	-	-	-
2	S%QET	1.6e-16	15	18	8.6e-11	1	0.001	1	0.001	8.6e-05	global-S%QET	CASSHQETQYF	TCRBV05-08	TCRBJ02-05	NA	03/0906:HD6_Tscm	1	-	-	-	-	-	-	-	-	-	-	-
3	S%STDT	2.6e-15	11	14	1.1e-08	1	0.15	1	0.001	7.4e-05	global-S%STDT	CASSHSTDTQYF	TCRBV07-02	TCRBJ02-03	NA	03/0903:HD3_Tscm	1	-	-	-	-	-	-	-	-	-	-	-
3	S%STDT	2.6e-15	11	14	1.1e-08	1	0.15	1	0.001	7.4e-05	global-S%STDT	CSASGSTDTQYF	TCRBV20-01	TCRBJ02-03	NA	03/0906:HD6_Tscm	1	-	-	-	-	-	-	-	-	-	-	-
3	S%STDT	2.6e-15	11	14	1.1e-08	1	0.15	1	0.001	7.4e-05	global-S%STDT	CASSFSTDTQYF	TCRBV09-01	TCRBJ02-03	NA	03/0902:HD2_Tscm	1	-	-	-	-	-	-	-	-	-	-	-
3	S%STDT	2.6e-15	11	14	1.1e-08	1	0.15	1	0.001	7.4e-05	global-S%STDT	CASSFSTDTQYF	TCRBV07-02	TCRBJ02-03	NA	03/0902:HD2_Tscm	1	-	-	-	-	-	-	-	-	-	-	-
3	S%STDT	2.6e-15	11	14	1.1e-08	1	0.15	1	0.001	7.4e-05	global-S%STDT	CASSFSTDTQYF	TCRBV07-09	TCRBJ02-03	NA	03/0902:HD2_Tscm	1	-	-	-	-	-	-	-	-	-	-	-
3	S%STDT	2.6e-15	11	14	1.1e-08	1	0.15	1	0.001	7.4e-05	global-S%STDT	CASSFSTDTQYF	TCRBV12-03	TCRBJ02-03	NA	03/0902:HD2_Tscm	1	-	-	-	-	-	-	-	-	-	-	-
3	S%STDT	2.6e-15	11	14	1.1e-08	1	0.15	1	0.001	7.4e-05	global-S%STDT	CASSFSTDTQYF	TCRBV05-06	TCRBJ02-03	NA	03/0903:HD3_Tscm	1	-	-	-	-	-	-	-	-	-	-	-
3	S%STDT	2.6e-15	11	14	1.1e-08	1	0.15	1	0.001	7.4e-05	global-S%STDT	CASSFSTDTQYF	TCRBV05-01	TCRBJ02-03	NA	03/0903:HD3_Tscm	1	-	-	-	-	-	-	-	-	-	-	-
3	S%STDT	2.6e-15	11	14	1.1e-08	1	0.15	1	0.001	7.4e-05	global-S%STDT	CASSFSTDTQYF	TCRBV07-02	TCRBJ02-03	NA	03/0903:HD3_Tscm	1	-	-	-	-	-	-	-	-	-	-	-
3	S%STDT	2.6e-15	11	14	1.1e-08	1	0.15	1	0.001	7.4e-05	global-S%STDT	CASSFSTDTQYF	TCRBV11-02	TCRBJ02-03	NA	03/0903:HD3_Tscm	1	-	-	-	-	-	-	-	-	-	-	-
3	S%STDT	2.6e-15	11	14	1.1e-08	1	0.15	1	0.001	7.4e-05	global-S%STDT	CASSFSTDTQYF	TCRBV12-03	TCRBJ02-03	NA	03/0903:HD3_Tscm	1	-	-	-	-	-	-	-	-	-	-	-
3	S%STDT	2.6e-15	11	14	1.1e-08	1	0.15	1	0.001	7.4e-05	global-S%STDT	CASSFSTDTQYF	TCRBV27-01	TCRBJ02-03	NA	03/0906:HD6_Tscm	1	-	-	-	-	-	-	-	-	-	-	-
3	S%STDT	2.6e-15	11	14	1.1e-08	1	0.15	1	0.001	7.4e-05	global-S%STDT	CASSFSTDTQYF	TCRBV05-01	TCRBJ02-03	NA	03/0906:HD6_Tscm	1	-	-	-	-	-	-	-	-	-	-	-
3	S%STDT	2.6e-15	11	14	1.1e-08	1	0.15	1	0.001	7.4e-05	global-S%STDT	CASSFSTDTQYF	TCRBV11-02	TCRBJ02-03	NA	03/0906:HD6_Tscm	1	-	-	-	-	-	-	-	-	-	-	-
3	S%STDT	2.6e-15	11	14	1.1e-08	1	0.15	1	0.001	7.4e-05	global-S%STDT	CASSFSTDTQYF	TCRBV07-09	TCRBJ02-03	NA	03/0906:HD6_Tscm	1	-	-	-	-	-	-	-	-	-	-	-
3	S%STDT	2.6e-15	11	14	1.1e-08	1	0.15	1	0.001	7.4e-05	global-S%STDT	CAISESTDTQYF	TCRBV10-03	TCRBJ02-03	NA	03/0906:HD6_Tscm	1	-	-	-	-	-	-	-	-	-	-	-
3	S%STDT	2.6e-15	11	14	1.1e-08	1	0.15	1	0.001	7.4e-05	global-S%STDT	CASSGSTDTQYF	TCRBV05-05	TCRBJ02-03	NA	03/0915:T1D7_Tscm	1	-	-	-	-	-	-	-	-	-	-	-
3	S%STDT	2.6e-15	11	14	1.1e-08	1	0.15	1	0.001	7.4e-05	global-S%STDT	CASSGSTDTQYF	TCRBV06-01	TCRBJ02-03	NA	03/0915:T1D7_Tscm	1	-	-	-	-	-	-	-	-	-	-	-
3	S%STDT	2.6e-15	11	14	1.1e-08	1	0.15	1	0.001	7.4e-05	global-S%STDT	CASSGSTDTQYF	TCRBV02-01	TCRBJ02-03	NA	03/0915:T1D7_Tscm	1	-	-	-	-	-	-	-	-	-	-	-
3	S%STDT	2.6e-15	11	14	1.1e-08	1	0.15	1	0.001	7.4e-05	global-S%STDT	CASSGSTDTQYF	TCRBV28-01	TCRBJ02-03	NA	03/0915:T1D7_Tscm	1	-	-	-	-	-	-	-	-	-	-	-
3	S%STDT	2.6e-15	11	14	1.1e-08	1	0.15	1	0.001	7.4e-05	global-S%STDT	CASSYSTDTQYF	TCRBV05-01	TCRBJ02-03	NA	03/0915:T1D7_Tscm	1	-	-	-	-	-	-	-	-	-	-	-
3	S%STDT	2.6e-15	11	14	1.1e-08	1	0.15	1	0.001	7.4e-05	global-S%STDT	CASSYSTDTQYF	TCRBV07-09	TCRBJ02-03	NA	03/0915:T1D7_Tscm	1	-	-	-	-	-	-	-	-	-	-	-
3	S%STDT	2.6e-15	11	14	1.1e-08	1	0.15	1	0.001	7.4e-05	global-S%STDT	CAWSQSTDTQYF	TCRBV30-01	TCRBJ02-03	NA	03/0902:HD2_Tscm	1	-	-	-	-	-	-	-	-	-	-	-
3	S%STDT	2.6e-15	11	14	1.1e-08	1	0.15	1	0.001	7.4e-05	global-S%STDT	CASSQSTDTQYF	TCRBV14-01	TCRBJ02-03	NA	03/0911:T1D3_Tscm	1	-	-	-	-	-	-	-	-	-	-	-
3	S%STDT	2.6e-15	11	14	1.1e-08	1	0.15	1	0.001	7.4e-05	global-S%STDT	CASSQSTDTQYF	TCRBV05-01	TCRBJ02-03	NA	03/0915:T1D7_Tscm	1	-	-	-	-	-	-	-	-	-	-	-
3	S%STDT	2.6e-15	11	14	1.1e-08	1	0.15	1	0.001	7.4e-05	global-S%STDT	CASSQSTDTQYF	TCRBV18-01	TCRBJ02-03	NA	03/0915:T1D7_Tscm	1	-	-	-	-	-	-	-	-	-	-	-
3	S%STDT	2.6e-15	11	14	1.1e-08	1	0.15	1	0.001	7.4e-05	global-S%STDT	CASSQSTDTQYF	TCRBV04-02	TCRBJ02-03	NA	03/0915:T1D7_Tscm	1	-	-	-	-	-	-	-	-	-	-	-
3	S%STDT	2.6e-15	11	14	1.1e-08	1	0.15	1	0.001	7.4e-05	global-S%STDT	CASSSSTDTQYF	TCRBV19-01	TCRBJ02-03	NA	03/0906:HD6_Tscm	1	-	-	-	-	-	-	-	-	-	-	-
3	S%STDT	2.6e-15	11	14	1.1e-08	1	0.15	1	0.001	7.4e-05	global-S%STDT	CASSSSTDTQYF	TCRBV05-01	TCRBJ02-03	NA	03/0906:HD6_Tscm	1	-	-	-	-	-	-	-	-	-	-	-
3	S%STDT	2.6e-15	11	14	1.1e-08	1	0.15	1	0.001	7.4e-05	global-S%STDT	CASSSSTDTQYF	TCRBV12-03	TCRBJ02-03	NA	03/0906:HD6_Tscm	1	-	-	-	-	-	-	-	-	-	-	-
3	S%STDT	2.6e-15	11	14	1.1e-08	1	0.15	1	0.001	7.4e-05	global-S%STDT	CASSSSTDTQYF	TCRBV05-06	TCRBJ02-03	NA	03/0906:HD6_Tscm	1	-	-	-	-	-	-	-	-	-	-	-
3	S%STDT	2.6e-15	11	14	1.1e-08	1	0.15	1	0.001	7.4e-05	global-S%STDT	CASSSSTDTQYF	TCRBV07-03	TCRBJ02-03	NA	03/0906:HD6_Tscm	1	-	-	-	-	-	-	-	-	-	-	-
3	S%STDT	2.6e-15	11	14	1.1e-08	1	0.15	1	0.001	7.4e-05	global-S%STDT	CASSSSTDTQYF	TCRBV14-01	TCRBJ02-03	NA	03/0906:HD6_Tscm	1	-	-	-	-	-	-	-	-	-	-	-
3	S%STDT	2.6e-15	11	14	1.1e-08	1	0.15	1	0.001	7.4e-05	global-S%STDT	CASSSSTDTQYF	TCRBV05-04	TCRBJ02-03	NA	03/0909:T1D1_Tscm	1	-	-	-	-	-	-	-	-	-	-	-
3	S%STDT	2.6e-15	11	14	1.1e-08	1	0.15	1	0.001	7.4e-05	global-S%STDT	CASSSSTDTQYF	TCRBV28-01	TCRBJ02-03	NA	03/0909:T1D1_Tscm	1	-	-	-	-	-	-	-	-	-	-	-
3	S%STDT	2.6e-15	11	14	1.1e-08	1	0.15	1	0.001	7.4e-05	global-S%STDT	CASSSSTDTQYF	TCRBV05-05	TCRBJ02-03	NA	03/0911:T1D3_Tscm	1	-	-	-	-	-	-	-	-	-	-	-
3	S%STDT	2.6e-15	11	14	1.1e-08	1	0.15	1	0.001	7.4e-05	global-S%STDT	CASSSSTDTQYF	TCRBV28-01	TCRBJ02-03	NA	03/0911:T1D3_Tscm	1	-	-	-	-	-	-	-	-	-	-	-
3	S%STDT	2.6e-15	11	14	1.1e-08	1	0.15	1	0.001	7.4e-05	global-S%STDT	CASSSSTDTQYF	TCRBV18-01	TCRBJ02-03	NA	03/0912:T1D4_Tscm	1	-	-	-	-	-	-	-	-	-	-	-
3	S%STDT	2.6e-15	11	14	1.1e-08	1	0.15	1	0.001	7.4e-05	global-S%STDT	CASSSSTDTQYF	TCRBV28-01	TCRBJ02-03	NA	03/0912:T1D4_Tscm	1	-	-	-	-	-	-	-	-	-	-	-
3	S%STDT	2.6e-15	11	14	1.1e-08	1	0.15	1	0.001	7.4e-05	global-S%STDT	CASSSSTDTQYF	TCRBV06-06	TCRBJ02-03	NA	03/0912:T1D4_Tscm	1	-	-	-	-	-	-	-	-	-	-	-
3	S%STDT	2.6e-15	11	14	1.1e-08	1	0.15	1	0.001	7.4e-05	global-S%STDT	CASSSSTDTQYF	TCRBV07-09	TCRBJ02-03	NA	03/0912:T1D4_Tscm	1	-	-	-	-	-	-	-	-	-	-	-
3	S%STDT	2.6e-15	11	14	1.1e-08	1	0.15	1	0.001	7.4e-05	global-S%STDT	CASSSSTDTQYF	TCRBV06-05	TCRBJ02-03	NA	03/0913:T1D5_Tscm	1	-	-	-	-	-	-	-	-	-	-	-
3	S%STDT	2.6e-15	11	14	1.1e-08	1	0.15	1	0.001	7.4e-05	global-S%STDT	CASSSSTDTQYF	TCRBV18-01	TCRBJ02-03	NA	03/0913:T1D5_Tscm	1	-	-	-	-	-	-	-	-	-	-	-
3	S%STDT	2.6e-15	11	14	1.1e-08	1	0.15	1	0.001	7.4e-05	global-S%STDT	CASSSSTDTQYF	TCRBV03-01	TCRBJ02-03	NA	03/0913:T1D5_Tscm	1	-	-	-	-	-	-	-	-	-	-	-
3	S%STDT	2.6e-15	11	14	1.1e-08	1	0.15	1	0.001	7.4e-05	global-S%STDT	CASSSSTDTQYF	TCRBV18-01	TCRBJ02-03	NA	03/0916:T1D8_Tscm	1	-	-	-	-	-	-	-	-	-	-	-
3	S%STDT	2.6e-15	11	14	1.1e-08	1	0.15	1	0.001	7.4e-05	global-S%STDT	CASSSSTDTQYF	TCRBV06-05	TCRBJ02-03	NA	03/0916:T1D8_Tscm	1	-	-	-	-	-	-	-	-	-	-	-
3	S%STDT	2.6e-15	11	14	1.1e-08	1	0.15	1	0.001	7.4e-05	global-S%STDT	CASSSSTDTQYF	TCRBV06-02	TCRBJ02-03	NA	03/0916:T1D8_Tscm	1	-	-	-	-	-	-	-	-	-	-	-
3	S%STDT	2.6e-15	11	14	1.1e-08	1	0.15	1	0.001	7.4e-05	global-S%STDT	CASSASTDTQYF	TCRBV07-09	TCRBJ02-03	NA	03/0907:HD7_Tscm	1	-	-	-	-	-	-	-	-	-	-	-
3	S%STDT	2.6e-15	11	14	1.1e-08	1	0.15	1	0.001	7.4e-05	global-S%STDT	CASSASTDTQYF	TCRBV07-02	TCRBJ02-03	NA	03/0916:T1D8_Tscm	1	-	-	-	-	-	-	-	-	-	-	-
3	S%STDT	2.6e-15	11	14	1.1e-08	1	0.15	1	0.001	7.4e-05	global-S%STDT	CASSASTDTQYF	TCRBV19-01	TCRBJ02-03	NA	03/0916:T1D8_Tscm	1	-	-	-	-	-	-	-	-	-	-	-
3	S%STDT	2.6e-15	11	14	1.1e-08	1	0.15	1	0.001	7.4e-05	global-S%STDT	CASSTSTDTQYF	TCRBV07-02	TCRBJ02-03	NA	03/0902:HD2_Tscm	1	-	-	-	-	-	-	-	-	-	-	-
3	S%STDT	2.6e-15	11	14	1.1e-08	1	0.15	1	0.001	7.4e-05	global-S%STDT	CASSTSTDTQYF	TCRBV07-09	TCRBJ02-03	NA	03/0902:HD2_Tscm	1	-	-	-	-	-	-	-	-	-	-	-
3	S%STDT	2.6e-15	11	14	1.1e-08	1	0.15	1	0.001	7.4e-05	global-S%STDT	CASSTSTDTQYF	TCRBV12-03	TCRBJ02-03	NA	03/0902:HD2_Tscm	1	-	-	-	-	-	-	-	-	-	-	-
3	S%STDT	2.6e-15	11	14	1.1e-08	1	0.15	1	0.001	7.4e-05	global-S%STDT	CASSTSTDTQYF	TCRBV06-02	TCRBJ02-03	NA	03/0902:HD2_Tscm	1	-	-	-	-	-	-	-	-	-	-	-
3	S%STDT	2.6e-15	11	14	1.1e-08	1	0.15	1	0.001	7.4e-05	global-S%STDT	CASSTSTDTQYF	TCRBV07-08	TCRBJ02-03	NA	03/0902:HD2_Tscm	1	-	-	-	-	-	-	-	-	-	-	-
3	S%STDT	2.6e-15	11	14	1.1e-08	1	0.15	1	0.001	7.4e-05	global-S%STDT	CASSTSTDTQYF	TCRBV18-01	TCRBJ02-03	NA	03/0902:HD2_Tscm	1	-	-	-	-	-	-	-	-	-	-	-
3	S%STDT	2.6e-15	11	14	1.1e-08	1	0.15	1	0.001	7.4e-05	global-S%STDT	CASSTSTDTQYF	TCRBV11-01	TCRBJ02-03	NA	03/0906:HD6_Tscm	1	-	-	-	-	-	-	-	-	-	-	-
3	S%STDT	2.6e-15	11	14	1.1e-08	1	0.15	1	0.001	7.4e-05	global-S%STDT	CASSTSTDTQYF	TCRBV06-06	TCRBJ02-03	NA	03/0906:HD6_Tscm	1	-	-	-	-	-	-	-	-	-	-	-
3	S%STDT	2.6e-15	11	14	1.1e-08	1	0.15	1	0.001	7.4e-05	global-S%STDT	CASSTSTDTQYF	TCRBV06-05	TCRBJ02-03	NA	03/0906:HD6_Tscm	1	-	-	-	-	-	-	-	-	-	-	-
3	S%STDT	2.6e-15	11	14	1.1e-08	1	0.15	1	0.001	7.4e-05	global-S%STDT	CASSTSTDTQYF	TCRBV06-02	TCRBJ02-03	NA	03/0906:HD6_Tscm	1	-	-	-	-	-	-	-	-	-	-	-
3	S%STDT	2.6e-15	11	14	1.1e-08	1	0.15	1	0.001	7.4e-05	global-S%STDT	CASSTSTDTQYF	TCRBV28-01	TCRBJ02-03	NA	03/0912:T1D4_Tscm	1	-	-	-	-	-	-	-	-	-	-	-
3	S%STDT	2.6e-15	11	14	1.1e-08	1	0.15	1	0.001	7.4e-05	global-S%STDT	CASSTSTDTQYF	TCRBV05-01	TCRBJ02-03	NA	03/0912:T1D4_Tscm	1	-	-	-	-	-	-	-	-	-	-	-
3	S%STDT	2.6e-15	11	14	1.1e-08	1	0.15	1	0.001	7.4e-05	global-S%STDT	CASSTSTDTQYF	TCRBV06-02	TCRBJ02-03	NA	03/0912:T1D4_Tscm	1	-	-	-	-	-	-	-	-	-	-	-
3	S%STDT	2.6e-15	11	14	1.1e-08	1	0.15	1	0.001	7.4e-05	global-S%STDT	CASSTSTDTQYF	TCRBV18-01	TCRBJ02-03	NA	03/0912:T1D4_Tscm	1	-	-	-	-	-	-	-	-	-	-	-
3	S%STDT	2.6e-15	11	14	1.1e-08	1	0.15	1	0.001	7.4e-05	global-S%STDT	CASSTSTDTQYF	TCRBV07-09	TCRBJ02-03	NA	03/0912:T1D4_Tscm	1	-	-	-	-	-	-	-	-	-	-	-
3	S%STDT	2.6e-15	11	14	1.1e-08	1	0.15	1	0.001	7.4e-05	global-S%STDT	CASSISTDTQYF	TCRBV11-02	TCRBJ02-03	NA	03/0907:HD7_Tscm	1	-	-	-	-	-	-	-	-	-	-	-
3	S%STDT	2.6e-15	11	14	1.1e-08	1	0.15	1	0.001	7.4e-05	global-S%STDT	CASSISTDTQYF	TCRBV02-01	TCRBJ02-03	NA	03/0907:HD7_Tscm	1	-	-	-	-	-	-	-	-	-	-	-
3	S%STDT	2.6e-15	11	14	1.1e-08	1	0.15	1	0.001	7.4e-05	global-S%STDT	CASSISTDTQYF	TCRBV07-02	TCRBJ02-03	NA	03/0907:HD7_Tscm	1	-	-	-	-	-	-	-	-	-	-	-
3	S%STDT	2.6e-15	11	14	1.1e-08	1	0.15	1	0.001	7.4e-05	global-S%STDT	CASSISTDTQYF	TCRBV07-09	TCRBJ02-03	NA	03/0907:HD7_Tscm	1	-	-	-	-	-	-	-	-	-	-	-
3	S%STDT	2.6e-15	11	14	1.1e-08	1	0.15	1	0.001	7.4e-05	global-S%STDT	CASSLSTDTQYF	TCRBV28-01	TCRBJ02-03	NA	03/0901:HD1_Tscm	1	-	-	-	-	-	-	-	-	-	-	-
3	S%STDT	2.6e-15	11	14	1.1e-08	1	0.15	1	0.001	7.4e-05	global-S%STDT	CASSLSTDTQYF	TCRBV07-08	TCRBJ02-03	NA	03/0902:HD2_Tscm	1	-	-	-	-	-	-	-	-	-	-	-
3	S%STDT	2.6e-15	11	14	1.1e-08	1	0.15	1	0.001	7.4e-05	global-S%STDT	CASSLSTDTQYF	TCRBV03-01	TCRBJ02-03	NA	03/0902:HD2_Tscm	1	-	-	-	-	-	-	-	-	-	-	-
3	S%STDT	2.6e-15	11	14	1.1e-08	1	0.15	1	0.001	7.4e-05	global-S%STDT	CASSLSTDTQYF	TCRBV07-03	TCRBJ02-03	NA	03/0902:HD2_Tscm	1	-	-	-	-	-	-	-	-	-	-	-
3	S%STDT	2.6e-15	11	14	1.1e-08	1	0.15	1	0.001	7.4e-05	global-S%STDT	CASSLSTDTQYF	TCRBV07-09	TCRBJ02-03	NA	03/0902:HD2_Tscm	1	-	-	-	-	-	-	-	-	-	-	-
3	S%STDT	2.6e-15	11	14	1.1e-08	1	0.15	1	0.001	7.4e-05	global-S%STDT	CASSLSTDTQYF	TCRBV05-01	TCRBJ02-03	NA	03/0902:HD2_Tscm	1	-	-	-	-	-	-	-	-	-	-	-
3	S%STDT	2.6e-15	11	14	1.1e-08	1	0.15	1	0.001	7.4e-05	global-S%STDT	CASSLSTDTQYF	TCRBV11-02	TCRBJ02-03	NA	03/0902:HD2_Tscm	1	-	-	-	-	-	-	-	-	-	-	-
3	S%STDT	2.6e-15	11	14	1.1e-08	1	0.15	1	0.001	7.4e-05	global-S%STDT	CASSLSTDTQYF	TCRBV07-02	TCRBJ02-03	NA	03/0902:HD2_Tscm	1	-	-	-	-	-	-	-	-	-	-	-
3	S%STDT	2.6e-15	11	14	1.1e-08	1	0.15	1	0.001	7.4e-05	global-S%STDT	CASSLSTDTQYF	TCRBV12-03	TCRBJ02-03	NA	03/0902:HD2_Tscm	1	-	-	-	-	-	-	-	-	-	-	-
3	S%STDT	2.6e-15	11	14	1.1e-08	1	0.15	1	0.001	7.4e-05	global-S%STDT	CASSLSTDTQYF	TCRBV14-01	TCRBJ02-03	NA	03/0903:HD3_Tscm	1	-	-	-	-	-	-	-	-	-	-	-
3	S%STDT	2.6e-15	11	14	1.1e-08	1	0.15	1	0.001	7.4e-05	global-S%STDT	CASSLSTDTQYF	TCRBV28-01	TCRBJ02-03	NA	03/0903:HD3_Tscm	1	-	-	-	-	-	-	-	-	-	-	-
3	S%STDT	2.6e-15	11	14	1.1e-08	1	0.15	1	0.001	7.4e-05	global-S%STDT	CASSLSTDTQYF	TCRBV07-02	TCRBJ02-03	NA	03/0903:HD3_Tscm	1	-	-	-	-	-	-	-	-	-	-	-
3	S%STDT	2.6e-15	11	14	1.1e-08	1	0.15	1	0.001	7.4e-05	global-S%STDT	CASSLSTDTQYF	TCRBV05-01	TCRBJ02-03	NA	03/0906:HD6_Tscm	1	-	-	-	-	-	-	-	-	-	-	-
3	S%STDT	2.6e-15	11	14	1.1e-08	1	0.15	1	0.001	7.4e-05	global-S%STDT	CASSLSTDTQYF	TCRBV07-09	TCRBJ02-03	NA	03/0906:HD6_Tscm	1	-	-	-	-	-	-	-	-	-	-	-
3	S%STDT	2.6e-15	11	14	1.1e-08	1	0.15	1	0.001	7.4e-05	global-S%STDT	CASSLSTDTQYF	TCRBV07-02	TCRBJ02-03	NA	03/0906:HD6_Tscm	1	-	-	-	-	-	-	-	-	-	-	-
3	S%STDT	2.6e-15	11	14	1.1e-08	1	0.15	1	0.001	7.4e-05	global-S%STDT	CASSLSTDTQYF	TCRBV07-08	TCRBJ02-03	NA	03/0906:HD6_Tscm	1	-	-	-	-	-	-	-	-	-	-	-
3	S%STDT	2.6e-15	11	14	1.1e-08	1	0.15	1	0.001	7.4e-05	global-S%STDT	CASSLSTDTQYF	TCRBV18-01	TCRBJ02-03	NA	03/0906:HD6_Tscm	1	-	-	-	-	-	-	-	-	-	-	-
3	S%STDT	2.6e-15	11	14	1.1e-08	1	0.15	1	0.001	7.4e-05	global-S%STDT	CASSLSTDTQYF	TCRBV19-01	TCRBJ02-03	NA	03/0906:HD6_Tscm	1	-	-	-	-	-	-	-	-	-	-	-
3	S%STDT	2.6e-15	11	14	1.1e-08	1	0.15	1	0.001	7.4e-05	global-S%STDT	CASSLSTDTQYF	TCRBV07-03	TCRBJ02-03	NA	03/0906:HD6_Tscm	1	-	-	-	-	-	-	-	-	-	-	-
3	S%STDT	2.6e-15	11	14	1.1e-08	1	0.15	1	0.001	7.4e-05	global-S%STDT	CASSLSTDTQYF	TCRBV05-01	TCRBJ02-03	NA	03/0912:T1D4_Tscm	1	-	-	-	-	-	-	-	-	-	-	-
3	S%STDT	2.6e-15	11	14	1.1e-08	1	0.15	1	0.001	7.4e-05	global-S%STDT	CASSLSTDTQYF	TCRBV03-01	TCRBJ02-03	NA	03/0912:T1D4_Tscm	1	-	-	-	-	-	-	-	-	-	-	-
3	S%STDT	2.6e-15	11	14	1.1e-08	1	0.15	1	0.001	7.4e-05	global-S%STDT	CASSLSTDTQYF	TCRBV28-01	TCRBJ02-03	NA	03/0912:T1D4_Tscm	1	-	-	-	-	-	-	-	-	-	-	-
3	S%STDT	2.6e-15	11	14	1.1e-08	1	0.15	1	0.001	7.4e-05	global-S%STDT	CASSLSTDTQYF	TCRBV07-09	TCRBJ02-03	NA	03/0912:T1D4_Tscm	1	-	-	-	-	-	-	-	-	-	-	-
3	S%STDT	2.6e-15	11	14	1.1e-08	1	0.15	1	0.001	7.4e-05	global-S%STDT	CASSLSTDTQYF	TCRBV07-08	TCRBJ02-03	NA	03/0912:T1D4_Tscm	1	-	-	-	-	-	-	-	-	-	-	-
3	S%STDT	2.6e-15	11	14	1.1e-08	1	0.15	1	0.001	7.4e-05	global-S%STDT	CASSLSTDTQYF	TCRBV12-03	TCRBJ02-03	NA	03/0912:T1D4_Tscm	1	-	-	-	-	-	-	-	-	-	-	-
3	S%STDT	2.6e-15	11	14	1.1e-08	1	0.15	1	0.001	7.4e-05	global-S%STDT	CASSLSTDTQYF	TCRBV02-01	TCRBJ02-03	NA	03/0912:T1D4_Tscm	1	-	-	-	-	-	-	-	-	-	-	-
3	S%STDT	2.6e-15	11	14	1.1e-08	1	0.15	1	0.001	7.4e-05	global-S%STDT	CASSLSTDTQYF	TCRBV12-03	TCRBJ02-03	NA	03/0915:T1D7_Tscm	1	-	-	-	-	-	-	-	-	-	-	-
3	S%STDT	2.6e-15	11	14	1.1e-08	1	0.15	1	0.001	7.4e-05	global-S%STDT	CASSLSTDTQYF	TCRBV11-01	TCRBJ02-03	NA	03/0915:T1D7_Tscm	1	-	-	-	-	-	-	-	-	-	-	-
3	S%STDT	2.6e-15	11	14	1.1e-08	1	0.15	1	0.001	7.4e-05	global-S%STDT	CASSLSTDTQYF	TCRBV11-02	TCRBJ02-03	NA	03/0915:T1D7_Tscm	1	-	-	-	-	-	-	-	-	-	-	-
3	S%STDT	2.6e-15	11	14	1.1e-08	1	0.15	1	0.001	7.4e-05	global-S%STDT	CASSLSTDTQYF	TCRBV05-04	TCRBJ02-03	NA	03/0915:T1D7_Tscm	1	-	-	-	-	-	-	-	-	-	-	-
3	S%STDT	2.6e-15	11	14	1.1e-08	1	0.15	1	0.001	7.4e-05	global-S%STDT	CASSLSTDTQYF	TCRBV18-01	TCRBJ02-03	NA	03/0915:T1D7_Tscm	1	-	-	-	-	-	-	-	-	-	-	-
3	S%STDT	2.6e-15	11	14	1.1e-08	1	0.15	1	0.001	7.4e-05	global-S%STDT	CASSLSTDTQYF	TCRBV28-01	TCRBJ02-03	NA	03/0915:T1D7_Tscm	1	-	-	-	-	-	-	-	-	-	-	-
3	S%STDT	2.6e-15	11	14	1.1e-08	1	0.15	1	0.001	7.4e-05	global-S%STDT	CASSLSTDTQYF	TCRBV03-01	TCRBJ02-03	NA	03/0915:T1D7_Tscm	1	-	-	-	-	-	-	-	-	-	-	-
3	S%STDT	2.6e-15	11	14	1.1e-08	1	0.15	1	0.001	7.4e-05	global-S%STDT	CASSLSTDTQYF	TCRBV07-09	TCRBJ02-03	NA	03/0916:T1D8_Tscm	1	-	-	-	-	-	-	-	-	-	-	-
3	S%STDT	2.6e-15	11	14	1.1e-08	1	0.15	1	0.001	7.4e-05	global-S%STDT	CASSRSTDTQYF	TCRBV18-01	TCRBJ02-03	NA	03/0903:HD3_Tscm	1	-	-	-	-	-	-	-	-	-	-	-
3	S%STDT	2.6e-15	11	14	1.1e-08	1	0.15	1	0.001	7.4e-05	global-S%STDT	CASSRSTDTQYF	TCRBV07-09	TCRBJ02-03	NA	03/0903:HD3_Tscm	1	-	-	-	-	-	-	-	-	-	-	-
3	S%STDT	2.6e-15	11	14	1.1e-08	1	0.15	1	0.001	7.4e-05	global-S%STDT	CASSRSTDTQYF	TCRBV18-01	TCRBJ02-03	NA	03/0913:T1D5_Tscm	1	-	-	-	-	-	-	-	-	-	-	-
4	S%SYE	4.1e-15	14	17	8.8e-09	1	0.093	1	0.001	9.5e-05	global-S%SYE	CAWSSSYEQYF	TCRBV30-01	TCRBJ02-07	NA	03/0904:HD4_Tscm	1	-	-	-	-	-	-	-	-	-	-	-
4	S%SYE	4.1e-15	14	17	8.8e-09	1	0.093	1	0.001	9.5e-05	global-S%SYE	CAWSLSYEQYF	TCRBV30-01	TCRBJ02-07	NA	03/0907:HD7_Tscm	1	-	-	-	-	-	-	-	-	-	-	-
4	S%SYE	4.1e-15	14	17	8.8e-09	1	0.093	1	0.001	9.5e-05	global-S%SYE	CASSLSYEQYF	TCRBV11-03	TCRBJ02-07	NA	03/0902:HD2_Tscm	1	-	-	-	-	-	-	-	-	-	-	-
4	S%SYE	4.1e-15	14	17	8.8e-09	1	0.093	1	0.001	9.5e-05	global-S%SYE	CASSLSYEQYF	TCRBV07-09	TCRBJ02-07	NA	03/0902:HD2_Tscm	1	-	-	-	-	-	-	-	-	-	-	-
4	S%SYE	4.1e-15	14	17	8.8e-09	1	0.093	1	0.001	9.5e-05	global-S%SYE	CASSLSYEQYF	TCRBV02-01	TCRBJ02-07	NA	03/0902:HD2_Tscm	1	-	-	-	-	-	-	-	-	-	-	-
4	S%SYE	4.1e-15	14	17	8.8e-09	1	0.093	1	0.001	9.5e-05	global-S%SYE	CASSLSYEQYF	TCRBV07-02	TCRBJ02-07	NA	03/0902:HD2_Tscm	1	-	-	-	-	-	-	-	-	-	-	-
4	S%SYE	4.1e-15	14	17	8.8e-09	1	0.093	1	0.001	9.5e-05	global-S%SYE	CASSLSYEQYF	TCRBV06-02	TCRBJ02-05	NA	03/0903:HD3_Tscm	1	-	-	-	-	-	-	-	-	-	-	-
4	S%SYE	4.1e-15	14	17	8.8e-09	1	0.093	1	0.001	9.5e-05	global-S%SYE	CASSLSYEQYF	TCRBV06-02	TCRBJ02-07	NA	03/0903:HD3_Tscm	1	-	-	-	-	-	-	-	-	-	-	-
4	S%SYE	4.1e-15	14	17	8.8e-09	1	0.093	1	0.001	9.5e-05	global-S%SYE	CASSLSYEQYF	TCRBV07-02	TCRBJ02-07	NA	03/0903:HD3_Tscm	1	-	-	-	-	-	-	-	-	-	-	-
4	S%SYE	4.1e-15	14	17	8.8e-09	1	0.093	1	0.001	9.5e-05	global-S%SYE	CASSLSYEQYF	TCRBV12-03	TCRBJ02-07	NA	03/0903:HD3_Tscm	1	-	-	-	-	-	-	-	-	-	-	-
4	S%SYE	4.1e-15	14	17	8.8e-09	1	0.093	1	0.001	9.5e-05	global-S%SYE	CASSLSYEQYF	TCRBV06-02	TCRBJ02-07	NA	03/0906:HD6_Tscm	1	-	-	-	-	-	-	-	-	-	-	-
4	S%SYE	4.1e-15	14	17	8.8e-09	1	0.093	1	0.001	9.5e-05	global-S%SYE	CASSLSYEQYF	TCRBV06-06	TCRBJ02-07	NA	03/0906:HD6_Tscm	1	-	-	-	-	-	-	-	-	-	-	-
4	S%SYE	4.1e-15	14	17	8.8e-09	1	0.093	1	0.001	9.5e-05	global-S%SYE	CASSLSYEQYF	TCRBV07-09	TCRBJ02-05	NA	03/0906:HD6_Tscm	1	-	-	-	-	-	-	-	-	-	-	-
4	S%SYE	4.1e-15	14	17	8.8e-09	1	0.093	1	0.001	9.5e-05	global-S%SYE	CASSLSYEQYF	TCRBV27-01	TCRBJ02-07	NA	03/0906:HD6_Tscm	1	-	-	-	-	-	-	-	-	-	-	-
4	S%SYE	4.1e-15	14	17	8.8e-09	1	0.093	1	0.001	9.5e-05	global-S%SYE	CASSLSYEQYF	TCRBV03-01	TCRBJ02-07	NA	03/0906:HD6_Tscm	1	-	-	-	-	-	-	-	-	-	-	-
4	S%SYE	4.1e-15	14	17	8.8e-09	1	0.093	1	0.001	9.5e-05	global-S%SYE	CASSLSYEQYF	TCRBV05-06	TCRBJ02-07	NA	03/0906:HD6_Tscm	1	-	-	-	-	-	-	-	-	-	-	-
4	S%SYE	4.1e-15	14	17	8.8e-09	1	0.093	1	0.001	9.5e-05	global-S%SYE	CASSLSYEQYF	TCRBV02-01	TCRBJ02-07	NA	03/0906:HD6_Tscm	1	-	-	-	-	-	-	-	-	-	-	-
4	S%SYE	4.1e-15	14	17	8.8e-09	1	0.093	1	0.001	9.5e-05	global-S%SYE	CASSLSYEQYF	TCRBV07-02	TCRBJ02-07	NA	03/0906:HD6_Tscm	1	-	-	-	-	-	-	-	-	-	-	-
4	S%SYE	4.1e-15	14	17	8.8e-09	1	0.093	1	0.001	9.5e-05	global-S%SYE	CASSLSYEQYF	TCRBV07-09	TCRBJ02-07	NA	03/0906:HD6_Tscm	1	-	-	-	-	-	-	-	-	-	-	-
4	S%SYE	4.1e-15	14	17	8.8e-09	1	0.093	1	0.001	9.5e-05	global-S%SYE	CASSLSYEQYF	TCRBV12-03	TCRBJ02-07	NA	03/0906:HD6_Tscm	1	-	-	-	-	-	-	-	-	-	-	-
4	S%SYE	4.1e-15	14	17	8.8e-09	1	0.093	1	0.001	9.5e-05	global-S%SYE	CASSLSYEQYF	TCRBV28-01	TCRBJ02-07	NA	03/0906:HD6_Tscm	1	-	-	-	-	-	-	-	-	-	-	-
4	S%SYE	4.1e-15	14	17	8.8e-09	1	0.093	1	0.001	9.5e-05	global-S%SYE	CASSLSYEQYF	TCRBV05-06	TCRBJ02-07	NA	03/0907:HD7_Tscm	1	-	-	-	-	-	-	-	-	-	-	-
4	S%SYE	4.1e-15	14	17	8.8e-09	1	0.093	1	0.001	9.5e-05	global-S%SYE	CASSLSYEQYF	TCRBV28-01	TCRBJ02-07	NA	03/0907:HD7_Tscm	1	-	-	-	-	-	-	-	-	-	-	-
4	S%SYE	4.1e-15	14	17	8.8e-09	1	0.093	1	0.001	9.5e-05	global-S%SYE	CASSLSYEQYF	TCRBV07-02	TCRBJ02-07	NA	03/0907:HD7_Tscm	1	-	-	-	-	-	-	-	-	-	-	-
4	S%SYE	4.1e-15	14	17	8.8e-09	1	0.093	1	0.001	9.5e-05	global-S%SYE	CASSLSYEQYF	TCRBV27-01	TCRBJ02-05	NA	03/0909:T1D1_Tscm	1	-	-	-	-	-	-	-	-	-	-	-
4	S%SYE	4.1e-15	14	17	8.8e-09	1	0.093	1	0.001	9.5e-05	global-S%SYE	CASSLSYEQYF	TCRBV07-02	TCRBJ02-07	NA	03/0909:T1D1_Tscm	1	-	-	-	-	-	-	-	-	-	-	-
4	S%SYE	4.1e-15	14	17	8.8e-09	1	0.093	1	0.001	9.5e-05	global-S%SYE	CASSLSYEQYF	TCRBV27-01	TCRBJ02-07	NA	03/0909:T1D1_Tscm	1	-	-	-	-	-	-	-	-	-	-	-
4	S%SYE	4.1e-15	14	17	8.8e-09	1	0.093	1	0.001	9.5e-05	global-S%SYE	CASSLSYEQYF	TCRBV12-03	TCRBJ02-07	NA	03/0909:T1D1_Tscm	1	-	-	-	-	-	-	-	-	-	-	-
4	S%SYE	4.1e-15	14	17	8.8e-09	1	0.093	1	0.001	9.5e-05	global-S%SYE	CASSLSYEQYF	TCRBV28-01	TCRBJ02-07	NA	03/0910:T1D2_Tscm	1	-	-	-	-	-	-	-	-	-	-	-
4	S%SYE	4.1e-15	14	17	8.8e-09	1	0.093	1	0.001	9.5e-05	global-S%SYE	CASSLSYEQYF	TCRBV18-01	TCRBJ02-07	NA	03/0910:T1D2_Tscm	1	-	-	-	-	-	-	-	-	-	-	-
4	S%SYE	4.1e-15	14	17	8.8e-09	1	0.093	1	0.001	9.5e-05	global-S%SYE	CASSLSYEQYF	TCRBV07-03	TCRBJ02-07	NA	03/0911:T1D3_Tscm	1	-	-	-	-	-	-	-	-	-	-	-
4	S%SYE	4.1e-15	14	17	8.8e-09	1	0.093	1	0.001	9.5e-05	global-S%SYE	CASSLSYEQYF	TCRBV06-02	TCRBJ02-07	NA	03/0911:T1D3_Tscm	1	-	-	-	-	-	-	-	-	-	-	-
4	S%SYE	4.1e-15	14	17	8.8e-09	1	0.093	1	0.001	9.5e-05	global-S%SYE	CASSLSYEQYF	TCRBV18-01	TCRBJ02-07	NA	03/0911:T1D3_Tscm	1	-	-	-	-	-	-	-	-	-	-	-
4	S%SYE	4.1e-15	14	17	8.8e-09	1	0.093	1	0.001	9.5e-05	global-S%SYE	CASSLSYEQYF	TCRBV07-02	TCRBJ02-07	NA	03/0911:T1D3_Tscm	1	-	-	-	-	-	-	-	-	-	-	-
4	S%SYE	4.1e-15	14	17	8.8e-09	1	0.093	1	0.001	9.5e-05	global-S%SYE	CASSLSYEQYF	TCRBV05-05	TCRBJ02-07	NA	03/0912:T1D4_Tscm	1	-	-	-	-	-	-	-	-	-	-	-
4	S%SYE	4.1e-15	14	17	8.8e-09	1	0.093	1	0.001	9.5e-05	global-S%SYE	CASSLSYEQYF	TCRBV07-08	TCRBJ02-07	NA	03/0912:T1D4_Tscm	1	-	-	-	-	-	-	-	-	-	-	-
4	S%SYE	4.1e-15	14	17	8.8e-09	1	0.093	1	0.001	9.5e-05	global-S%SYE	CASSLSYEQYF	TCRBV05-01	TCRBJ02-07	NA	03/0912:T1D4_Tscm	1	-	-	-	-	-	-	-	-	-	-	-
4	S%SYE	4.1e-15	14	17	8.8e-09	1	0.093	1	0.001	9.5e-05	global-S%SYE	CASSLSYEQYF	TCRBV05-06	TCRBJ02-07	NA	03/0912:T1D4_Tscm	1	-	-	-	-	-	-	-	-	-	-	-
4	S%SYE	4.1e-15	14	17	8.8e-09	1	0.093	1	0.001	9.5e-05	global-S%SYE	CASSLSYEQYF	TCRBV11-02	TCRBJ02-07	NA	03/0912:T1D4_Tscm	1	-	-	-	-	-	-	-	-	-	-	-
4	S%SYE	4.1e-15	14	17	8.8e-09	1	0.093	1	0.001	9.5e-05	global-S%SYE	CASSLSYEQYF	TCRBV03-01	TCRBJ02-07	NA	03/0912:T1D4_Tscm	1	-	-	-	-	-	-	-	-	-	-	-
4	S%SYE	4.1e-15	14	17	8.8e-09	1	0.093	1	0.001	9.5e-05	global-S%SYE	CASSLSYEQYF	TCRBV28-01	TCRBJ02-07	NA	03/0912:T1D4_Tscm	1	-	-	-	-	-	-	-	-	-	-	-
4	S%SYE	4.1e-15	14	17	8.8e-09	1	0.093	1	0.001	9.5e-05	global-S%SYE	CASSLSYEQYF	TCRBV07-09	TCRBJ02-07	NA	03/0912:T1D4_Tscm	1	-	-	-	-	-	-	-	-	-	-	-
4	S%SYE	4.1e-15	14	17	8.8e-09	1	0.093	1	0.001	9.5e-05	global-S%SYE	CASSLSYEQYF	TCRBV28-01	TCRBJ02-07	NA	03/0915:T1D7_Tscm	1	-	-	-	-	-	-	-	-	-	-	-
4	S%SYE	4.1e-15	14	17	8.8e-09	1	0.093	1	0.001	9.5e-05	global-S%SYE	CASSLSYEQYF	TCRBV14-01	TCRBJ02-07	NA	03/0915:T1D7_Tscm	1	-	-	-	-	-	-	-	-	-	-	-
4	S%SYE	4.1e-15	14	17	8.8e-09	1	0.093	1	0.001	9.5e-05	global-S%SYE	CASSLSYEQYF	TCRBV11-02	TCRBJ02-07	NA	03/0915:T1D7_Tscm	1	-	-	-	-	-	-	-	-	-	-	-
4	S%SYE	4.1e-15	14	17	8.8e-09	1	0.093	1	0.001	9.5e-05	global-S%SYE	CASSLSYEQYF	TCRBV02-01	TCRBJ02-07	NA	03/0915:T1D7_Tscm	1	-	-	-	-	-	-	-	-	-	-	-
4	S%SYE	4.1e-15	14	17	8.8e-09	1	0.093	1	0.001	9.5e-05	global-S%SYE	CASSLSYEQYF	TCRBV07-02	TCRBJ02-07	NA	03/0915:T1D7_Tscm	1	-	-	-	-	-	-	-	-	-	-	-
4	S%SYE	4.1e-15	14	17	8.8e-09	1	0.093	1	0.001	9.5e-05	global-S%SYE	CASSLSYEQYF	TCRBV12-03	TCRBJ02-07	NA	03/0915:T1D7_Tscm	1	-	-	-	-	-	-	-	-	-	-	-
4	S%SYE	4.1e-15	14	17	8.8e-09	1	0.093	1	0.001	9.5e-05	global-S%SYE	CASSLSYEQYF	TCRBV02-01	TCRBJ02-07	NA	03/0916:T1D8_Tscm	1	-	-	-	-	-	-	-	-	-	-	-
4	S%SYE	4.1e-15	14	17	8.8e-09	1	0.093	1	0.001	9.5e-05	global-S%SYE	CASSLSYEQYF	TCRBV07-09	TCRBJ02-07	NA	03/0916:T1D8_Tscm	1	-	-	-	-	-	-	-	-	-	-	-
4	S%SYE	4.1e-15	14	17	8.8e-09	1	0.093	1	0.001	9.5e-05	global-S%SYE	CASSYSYEQYF	TCRBV06-05	TCRBJ02-07	NA	03/0902:HD2_Tscm	1	-	-	-	-	-	-	-	-	-	-	-
4	S%SYE	4.1e-15	14	17	8.8e-09	1	0.093	1	0.001	9.5e-05	global-S%SYE	CASSYSYEQYF	TCRBV11-03	TCRBJ02-07	NA	03/0902:HD2_Tscm	1	-	-	-	-	-	-	-	-	-	-	-
4	S%SYE	4.1e-15	14	17	8.8e-09	1	0.093	1	0.001	9.5e-05	global-S%SYE	CASSYSYEQYF	TCRBV06-01	TCRBJ02-07	NA	03/0902:HD2_Tscm	1	-	-	-	-	-	-	-	-	-	-	-
4	S%SYE	4.1e-15	14	17	8.8e-09	1	0.093	1	0.001	9.5e-05	global-S%SYE	CASSYSYEQYF	TCRBV07-02	TCRBJ02-07	NA	03/0902:HD2_Tscm	1	-	-	-	-	-	-	-	-	-	-	-
4	S%SYE	4.1e-15	14	17	8.8e-09	1	0.093	1	0.001	9.5e-05	global-S%SYE	CASSYSYEQYF	TCRBV06-02	TCRBJ02-07	NA	03/0902:HD2_Tscm	1	-	-	-	-	-	-	-	-	-	-	-
4	S%SYE	4.1e-15	14	17	8.8e-09	1	0.093	1	0.001	9.5e-05	global-S%SYE	CASSYSYEQYF	TCRBV11-02	TCRBJ02-07	NA	03/0902:HD2_Tscm	1	-	-	-	-	-	-	-	-	-	-	-
4	S%SYE	4.1e-15	14	17	8.8e-09	1	0.093	1	0.001	9.5e-05	global-S%SYE	CASSYSYEQYF	TCRBV12-03	TCRBJ02-07	NA	03/0902:HD2_Tscm	1	-	-	-	-	-	-	-	-	-	-	-
4	S%SYE	4.1e-15	14	17	8.8e-09	1	0.093	1	0.001	9.5e-05	global-S%SYE	CASSYSYEQYF	TCRBV12-03	TCRBJ02-05	NA	03/0904:HD4_Tscm	1	-	-	-	-	-	-	-	-	-	-	-
4	S%SYE	4.1e-15	14	17	8.8e-09	1	0.093	1	0.001	9.5e-05	global-S%SYE	CASSYSYEQYF	TCRBV12-03	TCRBJ02-07	NA	03/0904:HD4_Tscm	1	-	-	-	-	-	-	-	-	-	-	-
4	S%SYE	4.1e-15	14	17	8.8e-09	1	0.093	1	0.001	9.5e-05	global-S%SYE	CASSYSYEQYF	TCRBV28-01	TCRBJ02-07	NA	03/0906:HD6_Tscm	1	-	-	-	-	-	-	-	-	-	-	-
4	S%SYE	4.1e-15	14	17	8.8e-09	1	0.093	1	0.001	9.5e-05	global-S%SYE	CASSYSYEQYF	TCRBV06-05	TCRBJ02-07	NA	03/0906:HD6_Tscm	1	-	-	-	-	-	-	-	-	-	-	-
4	S%SYE	4.1e-15	14	17	8.8e-09	1	0.093	1	0.001	9.5e-05	global-S%SYE	CASSYSYEQYF	TCRBV12-03	TCRBJ02-07	NA	03/0906:HD6_Tscm	1	-	-	-	-	-	-	-	-	-	-	-
4	S%SYE	4.1e-15	14	17	8.8e-09	1	0.093	1	0.001	9.5e-05	global-S%SYE	CASSYSYEQYF	TCRBV06-02	TCRBJ02-07	NA	03/0906:HD6_Tscm	1	-	-	-	-	-	-	-	-	-	-	-
4	S%SYE	4.1e-15	14	17	8.8e-09	1	0.093	1	0.001	9.5e-05	global-S%SYE	CASSYSYEQYF	TCRBV02-01	TCRBJ02-05	NA	03/0909:T1D1_Tscm	1	-	-	-	-	-	-	-	-	-	-	-
4	S%SYE	4.1e-15	14	17	8.8e-09	1	0.093	1	0.001	9.5e-05	global-S%SYE	CASSYSYEQYF	TCRBV06-02	TCRBJ02-07	NA	03/0909:T1D1_Tscm	1	-	-	-	-	-	-	-	-	-	-	-
4	S%SYE	4.1e-15	14	17	8.8e-09	1	0.093	1	0.001	9.5e-05	global-S%SYE	CASSYSYEQYF	TCRBV02-01	TCRBJ02-07	NA	03/0909:T1D1_Tscm	1	-	-	-	-	-	-	-	-	-	-	-
4	S%SYE	4.1e-15	14	17	8.8e-09	1	0.093	1	0.001	9.5e-05	global-S%SYE	CASSYSYEQYF	TCRBV05-06	TCRBJ02-07	NA	03/0909:T1D1_Tscm	1	-	-	-	-	-	-	-	-	-	-	-
4	S%SYE	4.1e-15	14	17	8.8e-09	1	0.093	1	0.001	9.5e-05	global-S%SYE	CASSYSYEQYF	TCRBV12-03	TCRBJ02-05	NA	03/0912:T1D4_Tscm	1	-	-	-	-	-	-	-	-	-	-	-
4	S%SYE	4.1e-15	14	17	8.8e-09	1	0.093	1	0.001	9.5e-05	global-S%SYE	CASSYSYEQYF	TCRBV28-01	TCRBJ02-07	NA	03/0912:T1D4_Tscm	1	-	-	-	-	-	-	-	-	-	-	-
4	S%SYE	4.1e-15	14	17	8.8e-09	1	0.093	1	0.001	9.5e-05	global-S%SYE	CASSYSYEQYF	TCRBV11-03	TCRBJ02-07	NA	03/0912:T1D4_Tscm	1	-	-	-	-	-	-	-	-	-	-	-
4	S%SYE	4.1e-15	14	17	8.8e-09	1	0.093	1	0.001	9.5e-05	global-S%SYE	CASSYSYEQYF	TCRBV12-03	TCRBJ02-07	NA	03/0912:T1D4_Tscm	1	-	-	-	-	-	-	-	-	-	-	-
4	S%SYE	4.1e-15	14	17	8.8e-09	1	0.093	1	0.001	9.5e-05	global-S%SYE	CAISVSYEQYF	TCRBV10-03	TCRBJ02-07	NA	03/0910:T1D2_Tscm	1	-	-	-	-	-	-	-	-	-	-	-
4	S%SYE	4.1e-15	14	17	8.8e-09	1	0.093	1	0.001	9.5e-05	global-S%SYE	CASSVSYEQYF	TCRBV07-09	TCRBJ02-07	NA	03/0903:HD3_Tscm	1	-	-	-	-	-	-	-	-	-	-	-
4	S%SYE	4.1e-15	14	17	8.8e-09	1	0.093	1	0.001	9.5e-05	global-S%SYE	CASSVSYEQYF	TCRBV28-01	TCRBJ02-07	NA	03/0903:HD3_Tscm	1	-	-	-	-	-	-	-	-	-	-	-
4	S%SYE	4.1e-15	14	17	8.8e-09	1	0.093	1	0.001	9.5e-05	global-S%SYE	CASSFSYEQYF	TCRBV07-09	TCRBJ02-05	NA	03/0902:HD2_Tscm	1	-	-	-	-	-	-	-	-	-	-	-
4	S%SYE	4.1e-15	14	17	8.8e-09	1	0.093	1	0.001	9.5e-05	global-S%SYE	CASSFSYEQYF	TCRBV07-06	TCRBJ02-07	NA	03/0902:HD2_Tscm	1	-	-	-	-	-	-	-	-	-	-	-
4	S%SYE	4.1e-15	14	17	8.8e-09	1	0.093	1	0.001	9.5e-05	global-S%SYE	CASSFSYEQYF	TCRBV02-01	TCRBJ02-07	NA	03/0902:HD2_Tscm	1	-	-	-	-	-	-	-	-	-	-	-
4	S%SYE	4.1e-15	14	17	8.8e-09	1	0.093	1	0.001	9.5e-05	global-S%SYE	CASSFSYEQYF	TCRBV12-03	TCRBJ02-07	NA	03/0902:HD2_Tscm	1	-	-	-	-	-	-	-	-	-	-	-
4	S%SYE	4.1e-15	14	17	8.8e-09	1	0.093	1	0.001	9.5e-05	global-S%SYE	CASSFSYEQYF	TCRBV07-09	TCRBJ02-07	NA	03/0902:HD2_Tscm	1	-	-	-	-	-	-	-	-	-	-	-
4	S%SYE	4.1e-15	14	17	8.8e-09	1	0.093	1	0.001	9.5e-05	global-S%SYE	CASSFSYEQYF	TCRBV07-02	TCRBJ02-07	NA	03/0902:HD2_Tscm	1	-	-	-	-	-	-	-	-	-	-	-
4	S%SYE	4.1e-15	14	17	8.8e-09	1	0.093	1	0.001	9.5e-05	global-S%SYE	CASSFSYEQYF	TCRBV28-01	TCRBJ02-07	NA	03/0902:HD2_Tscm	1	-	-	-	-	-	-	-	-	-	-	-
4	S%SYE	4.1e-15	14	17	8.8e-09	1	0.093	1	0.001	9.5e-05	global-S%SYE	CASSFSYEQYF	TCRBV06-02	TCRBJ02-07	NA	03/0906:HD6_Tscm	1	-	-	-	-	-	-	-	-	-	-	-
4	S%SYE	4.1e-15	14	17	8.8e-09	1	0.093	1	0.001	9.5e-05	global-S%SYE	CASSFSYEQYF	TCRBV12-03	TCRBJ02-07	NA	03/0906:HD6_Tscm	1	-	-	-	-	-	-	-	-	-	-	-
4	S%SYE	4.1e-15	14	17	8.8e-09	1	0.093	1	0.001	9.5e-05	global-S%SYE	CASSFSYEQYF	TCRBV28-01	TCRBJ02-07	NA	03/0906:HD6_Tscm	1	-	-	-	-	-	-	-	-	-	-	-
4	S%SYE	4.1e-15	14	17	8.8e-09	1	0.093	1	0.001	9.5e-05	global-S%SYE	CASSFSYEQYF	TCRBV05-06	TCRBJ02-07	NA	03/0906:HD6_Tscm	1	-	-	-	-	-	-	-	-	-	-	-
4	S%SYE	4.1e-15	14	17	8.8e-09	1	0.093	1	0.001	9.5e-05	global-S%SYE	CASSFSYEQYF	TCRBV07-02	TCRBJ02-07	NA	03/0906:HD6_Tscm	1	-	-	-	-	-	-	-	-	-	-	-
4	S%SYE	4.1e-15	14	17	8.8e-09	1	0.093	1	0.001	9.5e-05	global-S%SYE	CASSFSYEQYF	TCRBV07-09	TCRBJ02-07	NA	03/0906:HD6_Tscm	1	-	-	-	-	-	-	-	-	-	-	-
4	S%SYE	4.1e-15	14	17	8.8e-09	1	0.093	1	0.001	9.5e-05	global-S%SYE	CASSFSYEQYF	TCRBV07-02	TCRBJ02-07	NA	03/0907:HD7_Tscm	1	-	-	-	-	-	-	-	-	-	-	-
4	S%SYE	4.1e-15	14	17	8.8e-09	1	0.093	1	0.001	9.5e-05	global-S%SYE	CASSFSYEQYF	TCRBV06-02	TCRBJ02-07	NA	03/0907:HD7_Tscm	1	-	-	-	-	-	-	-	-	-	-	-
4	S%SYE	4.1e-15	14	17	8.8e-09	1	0.093	1	0.001	9.5e-05	global-S%SYE	CASSFSYEQYF	TCRBV07-08	TCRBJ02-07	NA	03/0907:HD7_Tscm	1	-	-	-	-	-	-	-	-	-	-	-
4	S%SYE	4.1e-15	14	17	8.8e-09	1	0.093	1	0.001	9.5e-05	global-S%SYE	CASSFSYEQYF	TCRBV07-09	TCRBJ02-07	NA	03/0907:HD7_Tscm	1	-	-	-	-	-	-	-	-	-	-	-
4	S%SYE	4.1e-15	14	17	8.8e-09	1	0.093	1	0.001	9.5e-05	global-S%SYE	CASSFSYEQYF	TCRBV11-01	TCRBJ02-07	NA	03/0915:T1D7_Tscm	1	-	-	-	-	-	-	-	-	-	-	-
4	S%SYE	4.1e-15	14	17	8.8e-09	1	0.093	1	0.001	9.5e-05	global-S%SYE	CASSFSYEQYF	TCRBV07-02	TCRBJ02-07	NA	03/0915:T1D7_Tscm	1	-	-	-	-	-	-	-	-	-	-	-
4	S%SYE	4.1e-15	14	17	8.8e-09	1	0.093	1	0.001	9.5e-05	global-S%SYE	CASSFSYEQYF	TCRBV05-06	TCRBJ02-07	NA	03/0915:T1D7_Tscm	1	-	-	-	-	-	-	-	-	-	-	-
4	S%SYE	4.1e-15	14	17	8.8e-09	1	0.093	1	0.001	9.5e-05	global-S%SYE	CASSFSYEQYF	TCRBV07-09	TCRBJ02-07	NA	03/0915:T1D7_Tscm	1	-	-	-	-	-	-	-	-	-	-	-
4	S%SYE	4.1e-15	14	17	8.8e-09	1	0.093	1	0.001	9.5e-05	global-S%SYE	CASSFSYEQYF	TCRBV28-01	TCRBJ02-07	NA	03/0915:T1D7_Tscm	1	-	-	-	-	-	-	-	-	-	-	-
4	S%SYE	4.1e-15	14	17	8.8e-09	1	0.093	1	0.001	9.5e-05	global-S%SYE	CASSFSYEQYF	TCRBV07-08	TCRBJ02-07	NA	03/0915:T1D7_Tscm	1	-	-	-	-	-	-	-	-	-	-	-
4	S%SYE	4.1e-15	14	17	8.8e-09	1	0.093	1	0.001	9.5e-05	global-S%SYE	CASSFSYEQYF	TCRBV12-03	TCRBJ02-07	NA	03/0915:T1D7_Tscm	1	-	-	-	-	-	-	-	-	-	-	-
4	S%SYE	4.1e-15	14	17	8.8e-09	1	0.093	1	0.001	9.5e-05	global-S%SYE	CASSRSYEQYF	TCRBV03-01	TCRBJ02-07	NA	03/0903:HD3_Tscm	1	-	-	-	-	-	-	-	-	-	-	-
4	S%SYE	4.1e-15	14	17	8.8e-09	1	0.093	1	0.001	9.5e-05	global-S%SYE	CASSRSYEQYF	TCRBV28-01	TCRBJ02-07	NA	03/0903:HD3_Tscm	1	-	-	-	-	-	-	-	-	-	-	-
4	S%SYE	4.1e-15	14	17	8.8e-09	1	0.093	1	0.001	9.5e-05	global-S%SYE	CASSRSYEQYF	TCRBV12-03	TCRBJ02-07	NA	03/0903:HD3_Tscm	1	-	-	-	-	-	-	-	-	-	-	-
4	S%SYE	4.1e-15	14	17	8.8e-09	1	0.093	1	0.001	9.5e-05	global-S%SYE	CASSRSYEQYF	TCRBV25-01	TCRBJ02-07	NA	03/0903:HD3_Tscm	1	-	-	-	-	-	-	-	-	-	-	-
4	S%SYE	4.1e-15	14	17	8.8e-09	1	0.093	1	0.001	9.5e-05	global-S%SYE	CASSHSYEQYF	TCRBV03-01	TCRBJ02-07	NA	03/0906:HD6_Tscm	1	-	-	-	-	-	-	-	-	-	-	-
4	S%SYE	4.1e-15	14	17	8.8e-09	1	0.093	1	0.001	9.5e-05	global-S%SYE	CASSHSYEQYF	TCRBV07-02	TCRBJ02-07	NA	03/0906:HD6_Tscm	1	-	-	-	-	-	-	-	-	-	-	-
4	S%SYE	4.1e-15	14	17	8.8e-09	1	0.093	1	0.001	9.5e-05	global-S%SYE	CASSHSYEQYF	TCRBV05-04	TCRBJ02-07	NA	03/0906:HD6_Tscm	1	-	-	-	-	-	-	-	-	-	-	-
4	S%SYE	4.1e-15	14	17	8.8e-09	1	0.093	1	0.001	9.5e-05	global-S%SYE	CASSHSYEQYF	TCRBV03-01	TCRBJ02-07	NA	03/0912:T1D4_Tscm	1	-	-	-	-	-	-	-	-	-	-	-
4	S%SYE	4.1e-15	14	17	8.8e-09	1	0.093	1	0.001	9.5e-05	global-S%SYE	CASSHSYEQYF	TCRBV05-01	TCRBJ02-07	NA	03/0912:T1D4_Tscm	1	-	-	-	-	-	-	-	-	-	-	-
4	S%SYE	4.1e-15	14	17	8.8e-09	1	0.093	1	0.001	9.5e-05	global-S%SYE	CASSHSYEQYF	TCRBV07-09	TCRBJ02-07	NA	03/0912:T1D4_Tscm	1	-	-	-	-	-	-	-	-	-	-	-
4	S%SYE	4.1e-15	14	17	8.8e-09	1	0.093	1	0.001	9.5e-05	global-S%SYE	CASSSSYEQYF	TCRBV05-04	TCRBJ02-07	NA	03/0902:HD2_Tscm	1	-	-	-	-	-	-	-	-	-	-	-
4	S%SYE	4.1e-15	14	17	8.8e-09	1	0.093	1	0.001	9.5e-05	global-S%SYE	CASSSSYEQYF	TCRBV11-01	TCRBJ02-07	NA	03/0902:HD2_Tscm	1	-	-	-	-	-	-	-	-	-	-	-
4	S%SYE	4.1e-15	14	17	8.8e-09	1	0.093	1	0.001	9.5e-05	global-S%SYE	CASSSSYEQYF	TCRBV12-03	TCRBJ02-07	NA	03/0902:HD2_Tscm	1	-	-	-	-	-	-	-	-	-	-	-
4	S%SYE	4.1e-15	14	17	8.8e-09	1	0.093	1	0.001	9.5e-05	global-S%SYE	CASSSSYEQYF	TCRBV27-01	TCRBJ02-07	NA	03/0902:HD2_Tscm	1	-	-	-	-	-	-	-	-	-	-	-
4	S%SYE	4.1e-15	14	17	8.8e-09	1	0.093	1	0.001	9.5e-05	global-S%SYE	CASSSSYEQYF	TCRBV19-01	TCRBJ02-07	NA	03/0902:HD2_Tscm	1	-	-	-	-	-	-	-	-	-	-	-
4	S%SYE	4.1e-15	14	17	8.8e-09	1	0.093	1	0.001	9.5e-05	global-S%SYE	CASSSSYEQYF	TCRBV11-02	TCRBJ02-07	NA	03/0902:HD2_Tscm	1	-	-	-	-	-	-	-	-	-	-	-
4	S%SYE	4.1e-15	14	17	8.8e-09	1	0.093	1	0.001	9.5e-05	global-S%SYE	CASSSSYEQYF	TCRBV18-01	TCRBJ02-07	NA	03/0902:HD2_Tscm	1	-	-	-	-	-	-	-	-	-	-	-
4	S%SYE	4.1e-15	14	17	8.8e-09	1	0.093	1	0.001	9.5e-05	global-S%SYE	CASSSSYEQYF	TCRBV07-09	TCRBJ02-07	NA	03/0902:HD2_Tscm	1	-	-	-	-	-	-	-	-	-	-	-
4	S%SYE	4.1e-15	14	17	8.8e-09	1	0.093	1	0.001	9.5e-05	global-S%SYE	CASSSSYEQYF	TCRBV07-02	TCRBJ02-07	NA	03/0902:HD2_Tscm	1	-	-	-	-	-	-	-	-	-	-	-
4	S%SYE	4.1e-15	14	17	8.8e-09	1	0.093	1	0.001	9.5e-05	global-S%SYE	CASSSSYEQYF	TCRBV07-09	TCRBJ02-07	NA	03/0903:HD3_Tscm	1	-	-	-	-	-	-	-	-	-	-	-
4	S%SYE	4.1e-15	14	17	8.8e-09	1	0.093	1	0.001	9.5e-05	global-S%SYE	CASSSSYEQYF	TCRBV06-02	TCRBJ02-07	NA	03/0903:HD3_Tscm	1	-	-	-	-	-	-	-	-	-	-	-
4	S%SYE	4.1e-15	14	17	8.8e-09	1	0.093	1	0.001	9.5e-05	global-S%SYE	CASSSSYEQYF	TCRBV05-04	TCRBJ02-07	NA	03/0903:HD3_Tscm	1	-	-	-	-	-	-	-	-	-	-	-
4	S%SYE	4.1e-15	14	17	8.8e-09	1	0.093	1	0.001	9.5e-05	global-S%SYE	CASSSSYEQYF	TCRBV03-01	TCRBJ02-07	NA	03/0906:HD6_Tscm	1	-	-	-	-	-	-	-	-	-	-	-
4	S%SYE	4.1e-15	14	17	8.8e-09	1	0.093	1	0.001	9.5e-05	global-S%SYE	CASSSSYEQYF	TCRBV06-04	TCRBJ02-07	NA	03/0906:HD6_Tscm	1	-	-	-	-	-	-	-	-	-	-	-
4	S%SYE	4.1e-15	14	17	8.8e-09	1	0.093	1	0.001	9.5e-05	global-S%SYE	CASSSSYEQYF	TCRBV07-09	TCRBJ02-07	NA	03/0906:HD6_Tscm	1	-	-	-	-	-	-	-	-	-	-	-
4	S%SYE	4.1e-15	14	17	8.8e-09	1	0.093	1	0.001	9.5e-05	global-S%SYE	CASSSSYEQYF	TCRBV11-02	TCRBJ02-07	NA	03/0906:HD6_Tscm	1	-	-	-	-	-	-	-	-	-	-	-
4	S%SYE	4.1e-15	14	17	8.8e-09	1	0.093	1	0.001	9.5e-05	global-S%SYE	CASSSSYEQYF	TCRBV06-06	TCRBJ02-07	NA	03/0906:HD6_Tscm	1	-	-	-	-	-	-	-	-	-	-	-
4	S%SYE	4.1e-15	14	17	8.8e-09	1	0.093	1	0.001	9.5e-05	global-S%SYE	CASSSSYEQYF	TCRBV07-02	TCRBJ02-07	NA	03/0906:HD6_Tscm	1	-	-	-	-	-	-	-	-	-	-	-
4	S%SYE	4.1e-15	14	17	8.8e-09	1	0.093	1	0.001	9.5e-05	global-S%SYE	CASSSSYEQYF	TCRBV28-01	TCRBJ02-07	NA	03/0906:HD6_Tscm	1	-	-	-	-	-	-	-	-	-	-	-
4	S%SYE	4.1e-15	14	17	8.8e-09	1	0.093	1	0.001	9.5e-05	global-S%SYE	CASSSSYEQYF	TCRBV05-01	TCRBJ02-07	NA	03/0906:HD6_Tscm	1	-	-	-	-	-	-	-	-	-	-	-
4	S%SYE	4.1e-15	14	17	8.8e-09	1	0.093	1	0.001	9.5e-05	global-S%SYE	CASSSSYEQYF	TCRBV12-03	TCRBJ02-07	NA	03/0906:HD6_Tscm	1	-	-	-	-	-	-	-	-	-	-	-
4	S%SYE	4.1e-15	14	17	8.8e-09	1	0.093	1	0.001	9.5e-05	global-S%SYE	CASSSSYEQYF	TCRBV07-03	TCRBJ02-07	NA	03/0907:HD7_Tscm	1	-	-	-	-	-	-	-	-	-	-	-
4	S%SYE	4.1e-15	14	17	8.8e-09	1	0.093	1	0.001	9.5e-05	global-S%SYE	CASSSSYEQYF	TCRBV11-03	TCRBJ02-07	NA	03/0907:HD7_Tscm	1	-	-	-	-	-	-	-	-	-	-	-
4	S%SYE	4.1e-15	14	17	8.8e-09	1	0.093	1	0.001	9.5e-05	global-S%SYE	CASSSSYEQYF	TCRBV06-05	TCRBJ02-07	NA	03/0907:HD7_Tscm	1	-	-	-	-	-	-	-	-	-	-	-
4	S%SYE	4.1e-15	14	17	8.8e-09	1	0.093	1	0.001	9.5e-05	global-S%SYE	CASSSSYEQYF	TCRBV07-09	TCRBJ02-07	NA	03/0907:HD7_Tscm	1	-	-	-	-	-	-	-	-	-	-	-
4	S%SYE	4.1e-15	14	17	8.8e-09	1	0.093	1	0.001	9.5e-05	global-S%SYE	CASSSSYEQYF	TCRBV07-08	TCRBJ02-07	NA	03/0907:HD7_Tscm	1	-	-	-	-	-	-	-	-	-	-	-
4	S%SYE	4.1e-15	14	17	8.8e-09	1	0.093	1	0.001	9.5e-05	global-S%SYE	CASSSSYEQYF	TCRBV03-01	TCRBJ02-07	NA	03/0907:HD7_Tscm	1	-	-	-	-	-	-	-	-	-	-	-
4	S%SYE	4.1e-15	14	17	8.8e-09	1	0.093	1	0.001	9.5e-05	global-S%SYE	CASSSSYEQYF	TCRBV07-02	TCRBJ02-07	NA	03/0907:HD7_Tscm	1	-	-	-	-	-	-	-	-	-	-	-
4	S%SYE	4.1e-15	14	17	8.8e-09	1	0.093	1	0.001	9.5e-05	global-S%SYE	CASSSSYEQYF	TCRBV07-02	TCRBJ02-07	NA	03/0909:T1D1_Tscm	1	-	-	-	-	-	-	-	-	-	-	-
4	S%SYE	4.1e-15	14	17	8.8e-09	1	0.093	1	0.001	9.5e-05	global-S%SYE	CASSSSYEQYF	TCRBV27-01	TCRBJ02-07	NA	03/0909:T1D1_Tscm	1	-	-	-	-	-	-	-	-	-	-	-
4	S%SYE	4.1e-15	14	17	8.8e-09	1	0.093	1	0.001	9.5e-05	global-S%SYE	CASSSSYEQYF	TCRBV03-01	TCRBJ02-07	NA	03/0909:T1D1_Tscm	1	-	-	-	-	-	-	-	-	-	-	-
4	S%SYE	4.1e-15	14	17	8.8e-09	1	0.093	1	0.001	9.5e-05	global-S%SYE	CASSSSYEQYF	TCRBV05-05	TCRBJ02-07	NA	03/0910:T1D2_Tscm	1	-	-	-	-	-	-	-	-	-	-	-
4	S%SYE	4.1e-15	14	17	8.8e-09	1	0.093	1	0.001	9.5e-05	global-S%SYE	CASSSSYEQYF	TCRBV05-04	TCRBJ02-07	NA	03/0910:T1D2_Tscm	1	-	-	-	-	-	-	-	-	-	-	-
4	S%SYE	4.1e-15	14	17	8.8e-09	1	0.093	1	0.001	9.5e-05	global-S%SYE	CASSSSYEQYF	TCRBV04-02	TCRBJ02-07	NA	03/0911:T1D3_Tscm	1	-	-	-	-	-	-	-	-	-	-	-
4	S%SYE	4.1e-15	14	17	8.8e-09	1	0.093	1	0.001	9.5e-05	global-S%SYE	CASSSSYEQYF	TCRBV11-01	TCRBJ02-07	NA	03/0911:T1D3_Tscm	1	-	-	-	-	-	-	-	-	-	-	-
4	S%SYE	4.1e-15	14	17	8.8e-09	1	0.093	1	0.001	9.5e-05	global-S%SYE	CASSSSYEQYF	TCRBV11-03	TCRBJ02-07	NA	03/0911:T1D3_Tscm	1	-	-	-	-	-	-	-	-	-	-	-
4	S%SYE	4.1e-15	14	17	8.8e-09	1	0.093	1	0.001	9.5e-05	global-S%SYE	CASSSSYEQYF	TCRBV05-01	TCRBJ02-07	NA	03/0911:T1D3_Tscm	1	-	-	-	-	-	-	-	-	-	-	-
4	S%SYE	4.1e-15	14	17	8.8e-09	1	0.093	1	0.001	9.5e-05	global-S%SYE	CASSSSYEQYF	TCRBV07-02	TCRBJ02-07	NA	03/0911:T1D3_Tscm	1	-	-	-	-	-	-	-	-	-	-	-
4	S%SYE	4.1e-15	14	17	8.8e-09	1	0.093	1	0.001	9.5e-05	global-S%SYE	CASSSSYEQYF	TCRBV05-04	TCRBJ02-07	NA	03/0911:T1D3_Tscm	1	-	-	-	-	-	-	-	-	-	-	-
4	S%SYE	4.1e-15	14	17	8.8e-09	1	0.093	1	0.001	9.5e-05	global-S%SYE	CASSSSYEQYF	TCRBV18-01	TCRBJ02-07	NA	03/0911:T1D3_Tscm	1	-	-	-	-	-	-	-	-	-	-	-
4	S%SYE	4.1e-15	14	17	8.8e-09	1	0.093	1	0.001	9.5e-05	global-S%SYE	CASSSSYEQYF	TCRBV11-02	TCRBJ02-07	NA	03/0911:T1D3_Tscm	1	-	-	-	-	-	-	-	-	-	-	-
4	S%SYE	4.1e-15	14	17	8.8e-09	1	0.093	1	0.001	9.5e-05	global-S%SYE	CASSSSYEQYF	TCRBV11-01	TCRBJ02-07	NA	03/0912:T1D4_Tscm	1	-	-	-	-	-	-	-	-	-	-	-
4	S%SYE	4.1e-15	14	17	8.8e-09	1	0.093	1	0.001	9.5e-05	global-S%SYE	CASSSSYEQYF	TCRBV28-01	TCRBJ02-07	NA	03/0912:T1D4_Tscm	1	-	-	-	-	-	-	-	-	-	-	-
4	S%SYE	4.1e-15	14	17	8.8e-09	1	0.093	1	0.001	9.5e-05	global-S%SYE	CASSSSYEQYF	TCRBV03-01	TCRBJ02-05	NA	03/0912:T1D4_Tscm	1	-	-	-	-	-	-	-	-	-	-	-
4	S%SYE	4.1e-15	14	17	8.8e-09	1	0.093	1	0.001	9.5e-05	global-S%SYE	CASSSSYEQYF	TCRBV05-05	TCRBJ02-07	NA	03/0912:T1D4_Tscm	1	-	-	-	-	-	-	-	-	-	-	-
4	S%SYE	4.1e-15	14	17	8.8e-09	1	0.093	1	0.001	9.5e-05	global-S%SYE	CASSSSYEQYF	TCRBV07-02	TCRBJ02-07	NA	03/0912:T1D4_Tscm	1	-	-	-	-	-	-	-	-	-	-	-
4	S%SYE	4.1e-15	14	17	8.8e-09	1	0.093	1	0.001	9.5e-05	global-S%SYE	CASSSSYEQYF	TCRBV18-01	TCRBJ02-07	NA	03/0912:T1D4_Tscm	1	-	-	-	-	-	-	-	-	-	-	-
4	S%SYE	4.1e-15	14	17	8.8e-09	1	0.093	1	0.001	9.5e-05	global-S%SYE	CASSSSYEQYF	TCRBV03-01	TCRBJ02-07	NA	03/0912:T1D4_Tscm	1	-	-	-	-	-	-	-	-	-	-	-
4	S%SYE	4.1e-15	14	17	8.8e-09	1	0.093	1	0.001	9.5e-05	global-S%SYE	CASSSSYEQYF	TCRBV07-09	TCRBJ02-07	NA	03/0912:T1D4_Tscm	1	-	-	-	-	-	-	-	-	-	-	-
4	S%SYE	4.1e-15	14	17	8.8e-09	1	0.093	1	0.001	9.5e-05	global-S%SYE	CASSDSYEQYF	TCRBV19-01	TCRBJ02-07	NA	03/0916:T1D8_Tscm	1	-	-	-	-	-	-	-	-	-	-	-
4	S%SYE	4.1e-15	14	17	8.8e-09	1	0.093	1	0.001	9.5e-05	global-S%SYE	CASSDSYEQYF	TCRBV28-01	TCRBJ02-07	NA	03/0916:T1D8_Tscm	1	-	-	-	-	-	-	-	-	-	-	-
4	S%SYE	4.1e-15	14	17	8.8e-09	1	0.093	1	0.001	9.5e-05	global-S%SYE	CASSQSYEQYF	TCRBV05-01	TCRBJ02-07	NA	03/0906:HD6_Tscm	1	-	-	-	-	-	-	-	-	-	-	-
4	S%SYE	4.1e-15	14	17	8.8e-09	1	0.093	1	0.001	9.5e-05	global-S%SYE	CASSQSYEQYF	TCRBV06-05	TCRBJ02-07	NA	03/0906:HD6_Tscm	1	-	-	-	-	-	-	-	-	-	-	-
4	S%SYE	4.1e-15	14	17	8.8e-09	1	0.093	1	0.001	9.5e-05	global-S%SYE	CASSQSYEQYF	TCRBV03-01	TCRBJ02-07	NA	03/0906:HD6_Tscm	1	-	-	-	-	-	-	-	-	-	-	-
4	S%SYE	4.1e-15	14	17	8.8e-09	1	0.093	1	0.001	9.5e-05	global-S%SYE	CASSQSYEQYF	TCRBV14-01	TCRBJ02-07	NA	03/0906:HD6_Tscm	1	-	-	-	-	-	-	-	-	-	-	-
4	S%SYE	4.1e-15	14	17	8.8e-09	1	0.093	1	0.001	9.5e-05	global-S%SYE	CASSQSYEQYF	TCRBV07-08	TCRBJ02-07	NA	03/0909:T1D1_Tscm	1	-	-	-	-	-	-	-	-	-	-	-
4	S%SYE	4.1e-15	14	17	8.8e-09	1	0.093	1	0.001	9.5e-05	global-S%SYE	CASSQSYEQYF	TCRBV28-01	TCRBJ02-07	NA	03/0909:T1D1_Tscm	1	-	-	-	-	-	-	-	-	-	-	-
4	S%SYE	4.1e-15	14	17	8.8e-09	1	0.093	1	0.001	9.5e-05	global-S%SYE	CASSQSYEQYF	TCRBV03-01	TCRBJ02-07	NA	03/0909:T1D1_Tscm	1	-	-	-	-	-	-	-	-	-	-	-
4	S%SYE	4.1e-15	14	17	8.8e-09	1	0.093	1	0.001	9.5e-05	global-S%SYE	CASSQSYEQYF	TCRBV07-09	TCRBJ02-07	NA	03/0916:T1D8_Tscm	1	-	-	-	-	-	-	-	-	-	-	-
4	S%SYE	4.1e-15	14	17	8.8e-09	1	0.093	1	0.001	9.5e-05	global-S%SYE	CASSQSYEQYF	TCRBV28-01	TCRBJ02-07	NA	03/0916:T1D8_Tscm	1	-	-	-	-	-	-	-	-	-	-	-
4	S%SYE	4.1e-15	14	17	8.8e-09	1	0.093	1	0.001	9.5e-05	global-S%SYE	CASSASYEQYF	TCRBV06-06	TCRBJ02-07	NA	03/0914:T1D6_Tscm	1	-	-	-	-	-	-	-	-	-	-	-
4	S%SYE	4.1e-15	14	17	8.8e-09	1	0.093	1	0.001	9.5e-05	global-S%SYE	CASSNSYEQYF	TCRBV04-01	TCRBJ02-07	NA	03/0901:HD1_Tscm	1	-	-	-	-	-	-	-	-	-	-	-
4	S%SYE	4.1e-15	14	17	8.8e-09	1	0.093	1	0.001	9.5e-05	global-S%SYE	CASSNSYEQYF	TCRBV04-03	TCRBJ02-07	NA	03/0901:HD1_Tscm	1	-	-	-	-	-	-	-	-	-	-	-
4	S%SYE	4.1e-15	14	17	8.8e-09	1	0.093	1	0.001	9.5e-05	global-S%SYE	CASSNSYEQYF	TCRBV06-05	TCRBJ02-07	NA	03/0902:HD2_Tscm	1	-	-	-	-	-	-	-	-	-	-	-
4	S%SYE	4.1e-15	14	17	8.8e-09	1	0.093	1	0.001	9.5e-05	global-S%SYE	CASSNSYEQYF	TCRBV11-02	TCRBJ02-07	NA	03/0902:HD2_Tscm	1	-	-	-	-	-	-	-	-	-	-	-
4	S%SYE	4.1e-15	14	17	8.8e-09	1	0.093	1	0.001	9.5e-05	global-S%SYE	CASSNSYEQYF	TCRBV07-02	TCRBJ02-07	NA	03/0902:HD2_Tscm	1	-	-	-	-	-	-	-	-	-	-	-
4	S%SYE	4.1e-15	14	17	8.8e-09	1	0.093	1	0.001	9.5e-05	global-S%SYE	CASSNSYEQYF	TCRBV06-02	TCRBJ02-07	NA	03/0902:HD2_Tscm	1	-	-	-	-	-	-	-	-	-	-	-
4	S%SYE	4.1e-15	14	17	8.8e-09	1	0.093	1	0.001	9.5e-05	global-S%SYE	CASSNSYEQYF	TCRBV06-06	TCRBJ02-07	NA	03/0902:HD2_Tscm	1	-	-	-	-	-	-	-	-	-	-	-
4	S%SYE	4.1e-15	14	17	8.8e-09	1	0.093	1	0.001	9.5e-05	global-S%SYE	CSASGSYEQYF	TCRBV29-01	TCRBJ02-07	NA	03/0908:HD8_Tscm	1	-	-	-	-	-	-	-	-	-	-	-
4	S%SYE	4.1e-15	14	17	8.8e-09	1	0.093	1	0.001	9.5e-05	global-S%SYE	CAISGSYEQYF	TCRBV10-03	TCRBJ02-07	NA	03/0912:T1D4_Tscm	1	-	-	-	-	-	-	-	-	-	-	-
4	S%SYE	4.1e-15	14	17	8.8e-09	1	0.093	1	0.001	9.5e-05	global-S%SYE	CASSTSYEQYF	TCRBV27-01	TCRBJ02-05	NA	03/0903:HD3_Tscm	1	-	-	-	-	-	-	-	-	-	-	-
4	S%SYE	4.1e-15	14	17	8.8e-09	1	0.093	1	0.001	9.5e-05	global-S%SYE	CASSTSYEQYF	TCRBV27-01	TCRBJ02-07	NA	03/0903:HD3_Tscm	1	-	-	-	-	-	-	-	-	-	-	-
4	S%SYE	4.1e-15	14	17	8.8e-09	1	0.093	1	0.001	9.5e-05	global-S%SYE	CASSTSYEQYF	TCRBV02-01	TCRBJ02-07	NA	03/0903:HD3_Tscm	1	-	-	-	-	-	-	-	-	-	-	-
5	SL%YE	9.1e-15	14	16	8.6e-11	1	0.001	1	0.001	8.6e-05	global-SL%YE	CASSLFYEQFF	TCRBV07-09	TCRBJ02-01	NA	03/0909:T1D1_Tscm	1	-	-	-	-	-	-	-	-	-	-	-
5	SL%YE	9.1e-15	14	16	8.6e-11	1	0.001	1	0.001	8.6e-05	global-SL%YE	CASSLLYEQYF	TCRBV11-01	TCRBJ02-07	NA	03/0906:HD6_Tscm	1	-	-	-	-	-	-	-	-	-	-	-
5	SL%YE	9.1e-15	14	16	8.6e-11	1	0.001	1	0.001	8.6e-05	global-SL%YE	CASSLLYEQYF	TCRBV28-01	TCRBJ02-07	NA	03/0906:HD6_Tscm	1	-	-	-	-	-	-	-	-	-	-	-
5	SL%YE	9.1e-15	14	16	8.6e-11	1	0.001	1	0.001	8.6e-05	global-SL%YE	CASSLLYEQYF	TCRBV12-03	TCRBJ02-07	NA	03/0906:HD6_Tscm	1	-	-	-	-	-	-	-	-	-	-	-
5	SL%YE	9.1e-15	14	16	8.6e-11	1	0.001	1	0.001	8.6e-05	global-SL%YE	CASSLLYEQYF	TCRBV05-01	TCRBJ02-07	NA	03/0907:HD7_Tscm	1	-	-	-	-	-	-	-	-	-	-	-
5	SL%YE	9.1e-15	14	16	8.6e-11	1	0.001	1	0.001	8.6e-05	global-SL%YE	CASSLLYEQYF	TCRBV28-01	TCRBJ02-05	NA	03/0907:HD7_Tscm	1	-	-	-	-	-	-	-	-	-	-	-
5	SL%YE	9.1e-15	14	16	8.6e-11	1	0.001	1	0.001	8.6e-05	global-SL%YE	CASSLLYEQYF	TCRBV07-02	TCRBJ02-07	NA	03/0907:HD7_Tscm	1	-	-	-	-	-	-	-	-	-	-	-
5	SL%YE	9.1e-15	14	16	8.6e-11	1	0.001	1	0.001	8.6e-05	global-SL%YE	CASSLLYEQYF	TCRBV28-01	TCRBJ02-07	NA	03/0907:HD7_Tscm	1	-	-	-	-	-	-	-	-	-	-	-
5	SL%YE	9.1e-15	14	16	8.6e-11	1	0.001	1	0.001	8.6e-05	global-SL%YE	CASSLLYEQYF	TCRBV02-01	TCRBJ02-07	NA	03/0907:HD7_Tscm	1	-	-	-	-	-	-	-	-	-	-	-
5	SL%YE	9.1e-15	14	16	8.6e-11	1	0.001	1	0.001	8.6e-05	global-SL%YE	CASSLYYEQYF	TCRBV11-02	TCRBJ02-07	NA	03/0902:HD2_Tscm	1	-	-	-	-	-	-	-	-	-	-	-
5	SL%YE	9.1e-15	14	16	8.6e-11	1	0.001	1	0.001	8.6e-05	global-SL%YE	CASSLYYEQYF	TCRBV07-02	TCRBJ02-07	NA	03/0902:HD2_Tscm	1	-	-	-	-	-	-	-	-	-	-	-
5	SL%YE	9.1e-15	14	16	8.6e-11	1	0.001	1	0.001	8.6e-05	global-SL%YE	CASSLYYEQYF	TCRBV12-03	TCRBJ02-07	NA	03/0906:HD6_Tscm	1	-	-	-	-	-	-	-	-	-	-	-
5	SL%YE	9.1e-15	14	16	8.6e-11	1	0.001	1	0.001	8.6e-05	global-SL%YE	CASSLYYEQYF	TCRBV28-01	TCRBJ02-05	NA	03/0906:HD6_Tscm	1	-	-	-	-	-	-	-	-	-	-	-
5	SL%YE	9.1e-15	14	16	8.6e-11	1	0.001	1	0.001	8.6e-05	global-SL%YE	CASSLYYEQYF	TCRBV05-04	TCRBJ02-07	NA	03/0906:HD6_Tscm	1	-	-	-	-	-	-	-	-	-	-	-
5	SL%YE	9.1e-15	14	16	8.6e-11	1	0.001	1	0.001	8.6e-05	global-SL%YE	CASSLYYEQYF	TCRBV28-01	TCRBJ02-07	NA	03/0906:HD6_Tscm	1	-	-	-	-	-	-	-	-	-	-	-
5	SL%YE	9.1e-15	14	16	8.6e-11	1	0.001	1	0.001	8.6e-05	global-SL%YE	CASSLYYEQYF	TCRBV07-09	TCRBJ02-07	NA	03/0906:HD6_Tscm	1	-	-	-	-	-	-	-	-	-	-	-
5	SL%YE	9.1e-15	14	16	8.6e-11	1	0.001	1	0.001	8.6e-05	global-SL%YE	CASSLYYEQYF	TCRBV11-02	TCRBJ02-07	NA	03/0915:T1D7_Tscm	1	-	-	-	-	-	-	-	-	-	-	-
5	SL%YE	9.1e-15	14	16	8.6e-11	1	0.001	1	0.001	8.6e-05	global-SL%YE	CASSLYYEQYF	TCRBV07-09	TCRBJ02-07	NA	03/0915:T1D7_Tscm	1	-	-	-	-	-	-	-	-	-	-	-
5	SL%YE	9.1e-15	14	16	8.6e-11	1	0.001	1	0.001	8.6e-05	global-SL%YE	CASSLYYEQYF	TCRBV07-02	TCRBJ02-07	NA	03/0915:T1D7_Tscm	1	-	-	-	-	-	-	-	-	-	-	-
5	SL%YE	9.1e-15	14	16	8.6e-11	1	0.001	1	0.001	8.6e-05	global-SL%YE	CASSLRYEQFF	TCRBV07-09	TCRBJ02-01	NA	03/0906:HD6_Tscm	1	-	-	-	-	-	-	-	-	-	-	-
5	SL%YE	9.1e-15	14	16	8.6e-11	1	0.001	1	0.001	8.6e-05	global-SL%YE	CASSLRYEQFF	TCRBV07-03	TCRBJ02-01	NA	03/0906:HD6_Tscm	1	-	-	-	-	-	-	-	-	-	-	-
5	SL%YE	9.1e-15	14	16	8.6e-11	1	0.001	1	0.001	8.6e-05	global-SL%YE	CASSLRYEQFF	TCRBV07-02	TCRBJ02-01	NA	03/0906:HD6_Tscm	1	-	-	-	-	-	-	-	-	-	-	-
5	SL%YE	9.1e-15	14	16	8.6e-11	1	0.001	1	0.001	8.6e-05	global-SL%YE	CASSLRYEQFF	TCRBV07-02	TCRBJ02-01	NA	03/0909:T1D1_Tscm	1	-	-	-	-	-	-	-	-	-	-	-
5	SL%YE	9.1e-15	14	16	8.6e-11	1	0.001	1	0.001	8.6e-05	global-SL%YE	CASSLKYEQYF	TCRBV28-01	TCRBJ02-05	NA	03/0914:T1D6_Tscm	1	-	-	-	-	-	-	-	-	-	-	-
5	SL%YE	9.1e-15	14	16	8.6e-11	1	0.001	1	0.001	8.6e-05	global-SL%YE	CASSLKYEQYF	TCRBV28-01	TCRBJ02-07	NA	03/0914:T1D6_Tscm	1	-	-	-	-	-	-	-	-	-	-	-
5	SL%YE	9.1e-15	14	16	8.6e-11	1	0.001	1	0.001	8.6e-05	global-SL%YE	CASSLKYEQYF	TCRBV06-06	TCRBJ02-07	NA	03/0914:T1D6_Tscm	1	-	-	-	-	-	-	-	-	-	-	-
5	SL%YE	9.1e-15	14	16	8.6e-11	1	0.001	1	0.001	8.6e-05	global-SL%YE	CASSLNYEQYF	TCRBV05-01	TCRBJ02-07	NA	03/0902:HD2_Tscm	1	-	-	-	-	-	-	-	-	-	-	-
5	SL%YE	9.1e-15	14	16	8.6e-11	1	0.001	1	0.001	8.6e-05	global-SL%YE	CASSLNYEQYF	TCRBV12-03	TCRBJ02-07	NA	03/0902:HD2_Tscm	1	-	-	-	-	-	-	-	-	-	-	-
5	SL%YE	9.1e-15	14	16	8.6e-11	1	0.001	1	0.001	8.6e-05	global-SL%YE	CASSLNYEQYF	TCRBV05-04	TCRBJ02-07	NA	03/0902:HD2_Tscm	1	-	-	-	-	-	-	-	-	-	-	-
5	SL%YE	9.1e-15	14	16	8.6e-11	1	0.001	1	0.001	8.6e-05	global-SL%YE	CASSLNYEQYF	TCRBV07-01	TCRBJ02-07	NA	03/0911:T1D3_Tscm	1	-	-	-	-	-	-	-	-	-	-	-
5	SL%YE	9.1e-15	14	16	8.6e-11	1	0.001	1	0.001	8.6e-05	global-SL%YE	CASSLNYEQYF	TCRBV28-01	TCRBJ02-07	NA	03/0911:T1D3_Tscm	1	-	-	-	-	-	-	-	-	-	-	-
5	SL%YE	9.1e-15	14	16	8.6e-11	1	0.001	1	0.001	8.6e-05	global-SL%YE	CASSLNYEQYF	TCRBV07-02	TCRBJ02-07	NA	03/0911:T1D3_Tscm	1	-	-	-	-	-	-	-	-	-	-	-
5	SL%YE	9.1e-15	14	16	8.6e-11	1	0.001	1	0.001	8.6e-05	global-SL%YE	CASSLNYEQYF	TCRBV11-03	TCRBJ02-07	NA	03/0912:T1D4_Tscm	1	-	-	-	-	-	-	-	-	-	-	-
5	SL%YE	9.1e-15	14	16	8.6e-11	1	0.001	1	0.001	8.6e-05	global-SL%YE	CASSLNYEQYF	TCRBV18-01	TCRBJ02-07	NA	03/0912:T1D4_Tscm	1	-	-	-	-	-	-	-	-	-	-	-
5	SL%YE	9.1e-15	14	16	8.6e-11	1	0.001	1	0.001	8.6e-05	global-SL%YE	CASSLNYEQYF	TCRBV05-01	TCRBJ02-07	NA	03/0912:T1D4_Tscm	1	-	-	-	-	-	-	-	-	-	-	-
5	SL%YE	9.1e-15	14	16	8.6e-11	1	0.001	1	0.001	8.6e-05	global-SL%YE	CASSLNYEQYF	TCRBV11-02	TCRBJ02-07	NA	03/0912:T1D4_Tscm	1	-	-	-	-	-	-	-	-	-	-	-
5	SL%YE	9.1e-15	14	16	8.6e-11	1	0.001	1	0.001	8.6e-05	global-SL%YE	CASSLNYEQYF	TCRBV25-01	TCRBJ02-07	NA	03/0912:T1D4_Tscm	1	-	-	-	-	-	-	-	-	-	-	-
5	SL%YE	9.1e-15	14	16	8.6e-11	1	0.001	1	0.001	8.6e-05	global-SL%YE	CASSLNYEQYF	TCRBV06-06	TCRBJ02-07	NA	03/0915:T1D7_Tscm	1	-	-	-	-	-	-	-	-	-	-	-
5	SL%YE	9.1e-15	14	16	8.6e-11	1	0.001	1	0.001	8.6e-05	global-SL%YE	CASSLNYEQYF	TCRBV07-08	TCRBJ02-07	NA	03/0915:T1D7_Tscm	1	-	-	-	-	-	-	-	-	-	-	-
5	SL%YE	9.1e-15	14	16	8.6e-11	1	0.001	1	0.001	8.6e-05	global-SL%YE	CASSLNYEQYF	TCRBV05-06	TCRBJ02-07	NA	03/0915:T1D7_Tscm	1	-	-	-	-	-	-	-	-	-	-	-
5	SL%YE	9.1e-15	14	16	8.6e-11	1	0.001	1	0.001	8.6e-05	global-SL%YE	CASSLNYEQYF	TCRBV18-01	TCRBJ02-07	NA	03/0915:T1D7_Tscm	1	-	-	-	-	-	-	-	-	-	-	-
5	SL%YE	9.1e-15	14	16	8.6e-11	1	0.001	1	0.001	8.6e-05	global-SL%YE	CASSLQYEQYF	TCRBV11-02	TCRBJ02-07	NA	03/0902:HD2_Tscm	1	-	-	-	-	-	-	-	-	-	-	-
5	SL%YE	9.1e-15	14	16	8.6e-11	1	0.001	1	0.001	8.6e-05	global-SL%YE	CASSLQYEQYF	TCRBV06-05	TCRBJ02-07	NA	03/0902:HD2_Tscm	1	-	-	-	-	-	-	-	-	-	-	-
5	SL%YE	9.1e-15	14	16	8.6e-11	1	0.001	1	0.001	8.6e-05	global-SL%YE	CASSLQYEQYF	TCRBV06-02	TCRBJ02-07	NA	03/0902:HD2_Tscm	1	-	-	-	-	-	-	-	-	-	-	-
5	SL%YE	9.1e-15	14	16	8.6e-11	1	0.001	1	0.001	8.6e-05	global-SL%YE	CASSLQYEQYF	TCRBV07-02	TCRBJ02-07	NA	03/0902:HD2_Tscm	1	-	-	-	-	-	-	-	-	-	-	-
5	SL%YE	9.1e-15	14	16	8.6e-11	1	0.001	1	0.001	8.6e-05	global-SL%YE	CASSLQYEQYF	TCRBV12-03	TCRBJ02-07	NA	03/0902:HD2_Tscm	1	-	-	-	-	-	-	-	-	-	-	-
5	SL%YE	9.1e-15	14	16	8.6e-11	1	0.001	1	0.001	8.6e-05	global-SL%YE	CASSLQYEQYF	TCRBV07-02	TCRBJ02-07	NA	03/0904:HD4_Tscm	1	-	-	-	-	-	-	-	-	-	-	-
5	SL%YE	9.1e-15	14	16	8.6e-11	1	0.001	1	0.001	8.6e-05	global-SL%YE	CASSLQYEQYF	TCRBV23-01	TCRBJ02-07	NA	03/0914:T1D6_Tscm	1	-	-	-	-	-	-	-	-	-	-	-
5	SL%YE	9.1e-15	14	16	8.6e-11	1	0.001	1	0.001	8.6e-05	global-SL%YE	CAWSLSYEQYF	TCRBV30-01	TCRBJ02-07	NA	03/0907:HD7_Tscm	1	-	-	-	-	-	-	-	-	-	-	-
5	SL%YE	9.1e-15	14	16	8.6e-11	1	0.001	1	0.001	8.6e-05	global-SL%YE	CASSLSYEQYF	TCRBV11-03	TCRBJ02-07	NA	03/0902:HD2_Tscm	1	-	-	-	-	-	-	-	-	-	-	-
5	SL%YE	9.1e-15	14	16	8.6e-11	1	0.001	1	0.001	8.6e-05	global-SL%YE	CASSLSYEQYF	TCRBV07-09	TCRBJ02-07	NA	03/0902:HD2_Tscm	1	-	-	-	-	-	-	-	-	-	-	-
5	SL%YE	9.1e-15	14	16	8.6e-11	1	0.001	1	0.001	8.6e-05	global-SL%YE	CASSLSYEQYF	TCRBV02-01	TCRBJ02-07	NA	03/0902:HD2_Tscm	1	-	-	-	-	-	-	-	-	-	-	-
5	SL%YE	9.1e-15	14	16	8.6e-11	1	0.001	1	0.001	8.6e-05	global-SL%YE	CASSLSYEQYF	TCRBV07-02	TCRBJ02-07	NA	03/0902:HD2_Tscm	1	-	-	-	-	-	-	-	-	-	-	-
5	SL%YE	9.1e-15	14	16	8.6e-11	1	0.001	1	0.001	8.6e-05	global-SL%YE	CASSLSYEQYF	TCRBV06-02	TCRBJ02-05	NA	03/0903:HD3_Tscm	1	-	-	-	-	-	-	-	-	-	-	-
5	SL%YE	9.1e-15	14	16	8.6e-11	1	0.001	1	0.001	8.6e-05	global-SL%YE	CASSLSYEQYF	TCRBV06-02	TCRBJ02-07	NA	03/0903:HD3_Tscm	1	-	-	-	-	-	-	-	-	-	-	-
5	SL%YE	9.1e-15	14	16	8.6e-11	1	0.001	1	0.001	8.6e-05	global-SL%YE	CASSLSYEQYF	TCRBV07-02	TCRBJ02-07	NA	03/0903:HD3_Tscm	1	-	-	-	-	-	-	-	-	-	-	-
5	SL%YE	9.1e-15	14	16	8.6e-11	1	0.001	1	0.001	8.6e-05	global-SL%YE	CASSLSYEQYF	TCRBV12-03	TCRBJ02-07	NA	03/0903:HD3_Tscm	1	-	-	-	-	-	-	-	-	-	-	-
5	SL%YE	9.1e-15	14	16	8.6e-11	1	0.001	1	0.001	8.6e-05	global-SL%YE	CASSLSYEQYF	TCRBV06-02	TCRBJ02-07	NA	03/0906:HD6_Tscm	1	-	-	-	-	-	-	-	-	-	-	-
5	SL%YE	9.1e-15	14	16	8.6e-11	1	0.001	1	0.001	8.6e-05	global-SL%YE	CASSLSYEQYF	TCRBV06-06	TCRBJ02-07	NA	03/0906:HD6_Tscm	1	-	-	-	-	-	-	-	-	-	-	-
5	SL%YE	9.1e-15	14	16	8.6e-11	1	0.001	1	0.001	8.6e-05	global-SL%YE	CASSLSYEQYF	TCRBV07-09	TCRBJ02-05	NA	03/0906:HD6_Tscm	1	-	-	-	-	-	-	-	-	-	-	-
5	SL%YE	9.1e-15	14	16	8.6e-11	1	0.001	1	0.001	8.6e-05	global-SL%YE	CASSLSYEQYF	TCRBV27-01	TCRBJ02-07	NA	03/0906:HD6_Tscm	1	-	-	-	-	-	-	-	-	-	-	-
5	SL%YE	9.1e-15	14	16	8.6e-11	1	0.001	1	0.001	8.6e-05	global-SL%YE	CASSLSYEQYF	TCRBV03-01	TCRBJ02-07	NA	03/0906:HD6_Tscm	1	-	-	-	-	-	-	-	-	-	-	-
5	SL%YE	9.1e-15	14	16	8.6e-11	1	0.001	1	0.001	8.6e-05	global-SL%YE	CASSLSYEQYF	TCRBV05-06	TCRBJ02-07	NA	03/0906:HD6_Tscm	1	-	-	-	-	-	-	-	-	-	-	-
5	SL%YE	9.1e-15	14	16	8.6e-11	1	0.001	1	0.001	8.6e-05	global-SL%YE	CASSLSYEQYF	TCRBV02-01	TCRBJ02-07	NA	03/0906:HD6_Tscm	1	-	-	-	-	-	-	-	-	-	-	-
5	SL%YE	9.1e-15	14	16	8.6e-11	1	0.001	1	0.001	8.6e-05	global-SL%YE	CASSLSYEQYF	TCRBV07-02	TCRBJ02-07	NA	03/0906:HD6_Tscm	1	-	-	-	-	-	-	-	-	-	-	-
5	SL%YE	9.1e-15	14	16	8.6e-11	1	0.001	1	0.001	8.6e-05	global-SL%YE	CASSLSYEQYF	TCRBV07-09	TCRBJ02-07	NA	03/0906:HD6_Tscm	1	-	-	-	-	-	-	-	-	-	-	-
5	SL%YE	9.1e-15	14	16	8.6e-11	1	0.001	1	0.001	8.6e-05	global-SL%YE	CASSLSYEQYF	TCRBV12-03	TCRBJ02-07	NA	03/0906:HD6_Tscm	1	-	-	-	-	-	-	-	-	-	-	-
5	SL%YE	9.1e-15	14	16	8.6e-11	1	0.001	1	0.001	8.6e-05	global-SL%YE	CASSLSYEQYF	TCRBV28-01	TCRBJ02-07	NA	03/0906:HD6_Tscm	1	-	-	-	-	-	-	-	-	-	-	-
5	SL%YE	9.1e-15	14	16	8.6e-11	1	0.001	1	0.001	8.6e-05	global-SL%YE	CASSLSYEQYF	TCRBV05-06	TCRBJ02-07	NA	03/0907:HD7_Tscm	1	-	-	-	-	-	-	-	-	-	-	-
5	SL%YE	9.1e-15	14	16	8.6e-11	1	0.001	1	0.001	8.6e-05	global-SL%YE	CASSLSYEQYF	TCRBV28-01	TCRBJ02-07	NA	03/0907:HD7_Tscm	1	-	-	-	-	-	-	-	-	-	-	-
5	SL%YE	9.1e-15	14	16	8.6e-11	1	0.001	1	0.001	8.6e-05	global-SL%YE	CASSLSYEQYF	TCRBV07-02	TCRBJ02-07	NA	03/0907:HD7_Tscm	1	-	-	-	-	-	-	-	-	-	-	-
5	SL%YE	9.1e-15	14	16	8.6e-11	1	0.001	1	0.001	8.6e-05	global-SL%YE	CASSLSYEQYF	TCRBV27-01	TCRBJ02-05	NA	03/0909:T1D1_Tscm	1	-	-	-	-	-	-	-	-	-	-	-
5	SL%YE	9.1e-15	14	16	8.6e-11	1	0.001	1	0.001	8.6e-05	global-SL%YE	CASSLSYEQYF	TCRBV07-02	TCRBJ02-07	NA	03/0909:T1D1_Tscm	1	-	-	-	-	-	-	-	-	-	-	-
5	SL%YE	9.1e-15	14	16	8.6e-11	1	0.001	1	0.001	8.6e-05	global-SL%YE	CASSLSYEQYF	TCRBV27-01	TCRBJ02-07	NA	03/0909:T1D1_Tscm	1	-	-	-	-	-	-	-	-	-	-	-
5	SL%YE	9.1e-15	14	16	8.6e-11	1	0.001	1	0.001	8.6e-05	global-SL%YE	CASSLSYEQYF	TCRBV12-03	TCRBJ02-07	NA	03/0909:T1D1_Tscm	1	-	-	-	-	-	-	-	-	-	-	-
5	SL%YE	9.1e-15	14	16	8.6e-11	1	0.001	1	0.001	8.6e-05	global-SL%YE	CASSLSYEQYF	TCRBV28-01	TCRBJ02-07	NA	03/0910:T1D2_Tscm	1	-	-	-	-	-	-	-	-	-	-	-
5	SL%YE	9.1e-15	14	16	8.6e-11	1	0.001	1	0.001	8.6e-05	global-SL%YE	CASSLSYEQYF	TCRBV18-01	TCRBJ02-07	NA	03/0910:T1D2_Tscm	1	-	-	-	-	-	-	-	-	-	-	-
5	SL%YE	9.1e-15	14	16	8.6e-11	1	0.001	1	0.001	8.6e-05	global-SL%YE	CASSLSYEQYF	TCRBV07-03	TCRBJ02-07	NA	03/0911:T1D3_Tscm	1	-	-	-	-	-	-	-	-	-	-	-
5	SL%YE	9.1e-15	14	16	8.6e-11	1	0.001	1	0.001	8.6e-05	global-SL%YE	CASSLSYEQYF	TCRBV06-02	TCRBJ02-07	NA	03/0911:T1D3_Tscm	1	-	-	-	-	-	-	-	-	-	-	-
5	SL%YE	9.1e-15	14	16	8.6e-11	1	0.001	1	0.001	8.6e-05	global-SL%YE	CASSLSYEQYF	TCRBV18-01	TCRBJ02-07	NA	03/0911:T1D3_Tscm	1	-	-	-	-	-	-	-	-	-	-	-
5	SL%YE	9.1e-15	14	16	8.6e-11	1	0.001	1	0.001	8.6e-05	global-SL%YE	CASSLSYEQYF	TCRBV07-02	TCRBJ02-07	NA	03/0911:T1D3_Tscm	1	-	-	-	-	-	-	-	-	-	-	-
5	SL%YE	9.1e-15	14	16	8.6e-11	1	0.001	1	0.001	8.6e-05	global-SL%YE	CASSLSYEQYF	TCRBV05-05	TCRBJ02-07	NA	03/0912:T1D4_Tscm	1	-	-	-	-	-	-	-	-	-	-	-
5	SL%YE	9.1e-15	14	16	8.6e-11	1	0.001	1	0.001	8.6e-05	global-SL%YE	CASSLSYEQYF	TCRBV07-08	TCRBJ02-07	NA	03/0912:T1D4_Tscm	1	-	-	-	-	-	-	-	-	-	-	-
5	SL%YE	9.1e-15	14	16	8.6e-11	1	0.001	1	0.001	8.6e-05	global-SL%YE	CASSLSYEQYF	TCRBV05-01	TCRBJ02-07	NA	03/0912:T1D4_Tscm	1	-	-	-	-	-	-	-	-	-	-	-
5	SL%YE	9.1e-15	14	16	8.6e-11	1	0.001	1	0.001	8.6e-05	global-SL%YE	CASSLSYEQYF	TCRBV05-06	TCRBJ02-07	NA	03/0912:T1D4_Tscm	1	-	-	-	-	-	-	-	-	-	-	-
5	SL%YE	9.1e-15	14	16	8.6e-11	1	0.001	1	0.001	8.6e-05	global-SL%YE	CASSLSYEQYF	TCRBV11-02	TCRBJ02-07	NA	03/0912:T1D4_Tscm	1	-	-	-	-	-	-	-	-	-	-	-
5	SL%YE	9.1e-15	14	16	8.6e-11	1	0.001	1	0.001	8.6e-05	global-SL%YE	CASSLSYEQYF	TCRBV03-01	TCRBJ02-07	NA	03/0912:T1D4_Tscm	1	-	-	-	-	-	-	-	-	-	-	-
5	SL%YE	9.1e-15	14	16	8.6e-11	1	0.001	1	0.001	8.6e-05	global-SL%YE	CASSLSYEQYF	TCRBV28-01	TCRBJ02-07	NA	03/0912:T1D4_Tscm	1	-	-	-	-	-	-	-	-	-	-	-
5	SL%YE	9.1e-15	14	16	8.6e-11	1	0.001	1	0.001	8.6e-05	global-SL%YE	CASSLSYEQYF	TCRBV07-09	TCRBJ02-07	NA	03/0912:T1D4_Tscm	1	-	-	-	-	-	-	-	-	-	-	-
5	SL%YE	9.1e-15	14	16	8.6e-11	1	0.001	1	0.001	8.6e-05	global-SL%YE	CASSLSYEQYF	TCRBV28-01	TCRBJ02-07	NA	03/0915:T1D7_Tscm	1	-	-	-	-	-	-	-	-	-	-	-
5	SL%YE	9.1e-15	14	16	8.6e-11	1	0.001	1	0.001	8.6e-05	global-SL%YE	CASSLSYEQYF	TCRBV14-01	TCRBJ02-07	NA	03/0915:T1D7_Tscm	1	-	-	-	-	-	-	-	-	-	-	-
5	SL%YE	9.1e-15	14	16	8.6e-11	1	0.001	1	0.001	8.6e-05	global-SL%YE	CASSLSYEQYF	TCRBV11-02	TCRBJ02-07	NA	03/0915:T1D7_Tscm	1	-	-	-	-	-	-	-	-	-	-	-
5	SL%YE	9.1e-15	14	16	8.6e-11	1	0.001	1	0.001	8.6e-05	global-SL%YE	CASSLSYEQYF	TCRBV02-01	TCRBJ02-07	NA	03/0915:T1D7_Tscm	1	-	-	-	-	-	-	-	-	-	-	-
5	SL%YE	9.1e-15	14	16	8.6e-11	1	0.001	1	0.001	8.6e-05	global-SL%YE	CASSLSYEQYF	TCRBV07-02	TCRBJ02-07	NA	03/0915:T1D7_Tscm	1	-	-	-	-	-	-	-	-	-	-	-
5	SL%YE	9.1e-15	14	16	8.6e-11	1	0.001	1	0.001	8.6e-05	global-SL%YE	CASSLSYEQYF	TCRBV12-03	TCRBJ02-07	NA	03/0915:T1D7_Tscm	1	-	-	-	-	-	-	-	-	-	-	-
5	SL%YE	9.1e-15	14	16	8.6e-11	1	0.001	1	0.001	8.6e-05	global-SL%YE	CASSLSYEQYF	TCRBV02-01	TCRBJ02-07	NA	03/0916:T1D8_Tscm	1	-	-	-	-	-	-	-	-	-	-	-
5	SL%YE	9.1e-15	14	16	8.6e-11	1	0.001	1	0.001	8.6e-05	global-SL%YE	CASSLSYEQYF	TCRBV07-09	TCRBJ02-07	NA	03/0916:T1D8_Tscm	1	-	-	-	-	-	-	-	-	-	-	-
5	SL%YE	9.1e-15	14	16	8.6e-11	1	0.001	1	0.001	8.6e-05	global-SL%YE	CASSLFYEQYF	TCRBV28-01	TCRBJ02-07	NA	03/0906:HD6_Tscm	1	-	-	-	-	-	-	-	-	-	-	-
5	SL%YE	9.1e-15	14	16	8.6e-11	1	0.001	1	0.001	8.6e-05	global-SL%YE	CASSLFYEQYF	TCRBV07-09	TCRBJ02-07	NA	03/0906:HD6_Tscm	1	-	-	-	-	-	-	-	-	-	-	-
5	SL%YE	9.1e-15	14	16	8.6e-11	1	0.001	1	0.001	8.6e-05	global-SL%YE	CASSLVYEQYF	TCRBV07-09	TCRBJ02-05	NA	03/0903:HD3_Tscm	1	-	-	-	-	-	-	-	-	-	-	-
5	SL%YE	9.1e-15	14	16	8.6e-11	1	0.001	1	0.001	8.6e-05	global-SL%YE	CASSLVYEQYF	TCRBV07-06	TCRBJ02-07	NA	03/0903:HD3_Tscm	1	-	-	-	-	-	-	-	-	-	-	-
5	SL%YE	9.1e-15	14	16	8.6e-11	1	0.001	1	0.001	8.6e-05	global-SL%YE	CASSLVYEQYF	TCRBV07-09	TCRBJ02-07	NA	03/0903:HD3_Tscm	1	-	-	-	-	-	-	-	-	-	-	-
5	SL%YE	9.1e-15	14	16	8.6e-11	1	0.001	1	0.001	8.6e-05	global-SL%YE	CASSLVYEQYF	TCRBV07-02	TCRBJ02-07	NA	03/0903:HD3_Tscm	1	-	-	-	-	-	-	-	-	-	-	-
5	SL%YE	9.1e-15	14	16	8.6e-11	1	0.001	1	0.001	8.6e-05	global-SL%YE	CASSLVYEQYF	TCRBV07-02	TCRBJ02-05	NA	03/0904:HD4_Tscm	1	-	-	-	-	-	-	-	-	-	-	-
5	SL%YE	9.1e-15	14	16	8.6e-11	1	0.001	1	0.001	8.6e-05	global-SL%YE	CASSLVYEQYF	TCRBV07-02	TCRBJ02-07	NA	03/0904:HD4_Tscm	1	-	-	-	-	-	-	-	-	-	-	-
5	SL%YE	9.1e-15	14	16	8.6e-11	1	0.001	1	0.001	8.6e-05	global-SL%YE	CASSLVYEQYF	TCRBV12-03	TCRBJ02-07	NA	03/0904:HD4_Tscm	1	-	-	-	-	-	-	-	-	-	-	-
5	SL%YE	9.1e-15	14	16	8.6e-11	1	0.001	1	0.001	8.6e-05	global-SL%YE	CASSLVYEQYF	TCRBV07-02	TCRBJ02-05	NA	03/0906:HD6_Tscm	1	-	-	-	-	-	-	-	-	-	-	-
5	SL%YE	9.1e-15	14	16	8.6e-11	1	0.001	1	0.001	8.6e-05	global-SL%YE	CASSLVYEQYF	TCRBV12-03	TCRBJ02-07	NA	03/0906:HD6_Tscm	1	-	-	-	-	-	-	-	-	-	-	-
5	SL%YE	9.1e-15	14	16	8.6e-11	1	0.001	1	0.001	8.6e-05	global-SL%YE	CASSLVYEQYF	TCRBV28-01	TCRBJ02-07	NA	03/0906:HD6_Tscm	1	-	-	-	-	-	-	-	-	-	-	-
5	SL%YE	9.1e-15	14	16	8.6e-11	1	0.001	1	0.001	8.6e-05	global-SL%YE	CASSLVYEQYF	TCRBV07-02	TCRBJ02-07	NA	03/0906:HD6_Tscm	1	-	-	-	-	-	-	-	-	-	-	-
5	SL%YE	9.1e-15	14	16	8.6e-11	1	0.001	1	0.001	8.6e-05	global-SL%YE	CASSLVYEQYF	TCRBV07-09	TCRBJ02-07	NA	03/0906:HD6_Tscm	1	-	-	-	-	-	-	-	-	-	-	-
5	SL%YE	9.1e-15	14	16	8.6e-11	1	0.001	1	0.001	8.6e-05	global-SL%YE	CASSLVYEQYF	TCRBV07-09	TCRBJ02-07	NA	03/0912:T1D4_Tscm	1	-	-	-	-	-	-	-	-	-	-	-
5	SL%YE	9.1e-15	14	16	8.6e-11	1	0.001	1	0.001	8.6e-05	global-SL%YE	CASSLAYEQYF	TCRBV05-06	TCRBJ02-05	NA	03/0906:HD6_Tscm	1	-	-	-	-	-	-	-	-	-	-	-
5	SL%YE	9.1e-15	14	16	8.6e-11	1	0.001	1	0.001	8.6e-05	global-SL%YE	CASSLAYEQYF	TCRBV05-06	TCRBJ02-07	NA	03/0906:HD6_Tscm	1	-	-	-	-	-	-	-	-	-	-	-
5	SL%YE	9.1e-15	14	16	8.6e-11	1	0.001	1	0.001	8.6e-05	global-SL%YE	CASSLAYEQYF	TCRBV07-02	TCRBJ02-07	NA	03/0906:HD6_Tscm	1	-	-	-	-	-	-	-	-	-	-	-
5	SL%YE	9.1e-15	14	16	8.6e-11	1	0.001	1	0.001	8.6e-05	global-SL%YE	CASSLAYEQYF	TCRBV07-08	TCRBJ02-07	NA	03/0906:HD6_Tscm	1	-	-	-	-	-	-	-	-	-	-	-
5	SL%YE	9.1e-15	14	16	8.6e-11	1	0.001	1	0.001	8.6e-05	global-SL%YE	CASSLAYEQYF	TCRBV11-02	TCRBJ02-07	NA	03/0906:HD6_Tscm	1	-	-	-	-	-	-	-	-	-	-	-
5	SL%YE	9.1e-15	14	16	8.6e-11	1	0.001	1	0.001	8.6e-05	global-SL%YE	CASSLAYEQYF	TCRBV03-01	TCRBJ02-07	NA	03/0906:HD6_Tscm	1	-	-	-	-	-	-	-	-	-	-	-
5	SL%YE	9.1e-15	14	16	8.6e-11	1	0.001	1	0.001	8.6e-05	global-SL%YE	CASSLAYEQYF	TCRBV28-01	TCRBJ02-07	NA	03/0906:HD6_Tscm	1	-	-	-	-	-	-	-	-	-	-	-
5	SL%YE	9.1e-15	14	16	8.6e-11	1	0.001	1	0.001	8.6e-05	global-SL%YE	CASSLAYEQYF	TCRBV07-09	TCRBJ02-07	NA	03/0906:HD6_Tscm	1	-	-	-	-	-	-	-	-	-	-	-
5	SL%YE	9.1e-15	14	16	8.6e-11	1	0.001	1	0.001	8.6e-05	global-SL%YE	CASSLAYEQYF	TCRBV11-03	TCRBJ02-07	NA	03/0907:HD7_Tscm	1	-	-	-	-	-	-	-	-	-	-	-
5	SL%YE	9.1e-15	14	16	8.6e-11	1	0.001	1	0.001	8.6e-05	global-SL%YE	CASSLAYEQYF	TCRBV28-01	TCRBJ02-05	NA	03/0907:HD7_Tscm	1	-	-	-	-	-	-	-	-	-	-	-
5	SL%YE	9.1e-15	14	16	8.6e-11	1	0.001	1	0.001	8.6e-05	global-SL%YE	CASSLAYEQYF	TCRBV05-04	TCRBJ02-07	NA	03/0907:HD7_Tscm	1	-	-	-	-	-	-	-	-	-	-	-
5	SL%YE	9.1e-15	14	16	8.6e-11	1	0.001	1	0.001	8.6e-05	global-SL%YE	CASSLAYEQYF	TCRBV05-08	TCRBJ02-07	NA	03/0907:HD7_Tscm	1	-	-	-	-	-	-	-	-	-	-	-
5	SL%YE	9.1e-15	14	16	8.6e-11	1	0.001	1	0.001	8.6e-05	global-SL%YE	CASSLAYEQYF	TCRBV05-01	TCRBJ02-07	NA	03/0907:HD7_Tscm	1	-	-	-	-	-	-	-	-	-	-	-
5	SL%YE	9.1e-15	14	16	8.6e-11	1	0.001	1	0.001	8.6e-05	global-SL%YE	CASSLAYEQYF	TCRBV05-06	TCRBJ02-07	NA	03/0907:HD7_Tscm	1	-	-	-	-	-	-	-	-	-	-	-
5	SL%YE	9.1e-15	14	16	8.6e-11	1	0.001	1	0.001	8.6e-05	global-SL%YE	CASSLAYEQYF	TCRBV28-01	TCRBJ02-07	NA	03/0907:HD7_Tscm	1	-	-	-	-	-	-	-	-	-	-	-
5	SL%YE	9.1e-15	14	16	8.6e-11	1	0.001	1	0.001	8.6e-05	global-SL%YE	CASSLAYEQYF	TCRBV07-09	TCRBJ02-07	NA	03/0907:HD7_Tscm	1	-	-	-	-	-	-	-	-	-	-	-
5	SL%YE	9.1e-15	14	16	8.6e-11	1	0.001	1	0.001	8.6e-05	global-SL%YE	CASSLAYEQYF	TCRBV07-02	TCRBJ02-07	NA	03/0907:HD7_Tscm	1	-	-	-	-	-	-	-	-	-	-	-
5	SL%YE	9.1e-15	14	16	8.6e-11	1	0.001	1	0.001	8.6e-05	global-SL%YE	CASSLDYEQYF	TCRBV28-01	TCRBJ02-07	NA	03/0903:HD3_Tscm	1	-	-	-	-	-	-	-	-	-	-	-
5	SL%YE	9.1e-15	14	16	8.6e-11	1	0.001	1	0.001	8.6e-05	global-SL%YE	CASSLDYEQYF	TCRBV18-01	TCRBJ02-07	NA	03/0903:HD3_Tscm	1	-	-	-	-	-	-	-	-	-	-	-
5	SL%YE	9.1e-15	14	16	8.6e-11	1	0.001	1	0.001	8.6e-05	global-SL%YE	CASSLDYEQYF	TCRBV07-02	TCRBJ02-07	NA	03/0903:HD3_Tscm	1	-	-	-	-	-	-	-	-	-	-	-
5	SL%YE	9.1e-15	14	16	8.6e-11	1	0.001	1	0.001	8.6e-05	global-SL%YE	CASSLDYEQYF	TCRBV06-05	TCRBJ02-07	NA	03/0906:HD6_Tscm	1	-	-	-	-	-	-	-	-	-	-	-
5	SL%YE	9.1e-15	14	16	8.6e-11	1	0.001	1	0.001	8.6e-05	global-SL%YE	CASSLDYEQYF	TCRBV07-02	TCRBJ02-05	NA	03/0906:HD6_Tscm	1	-	-	-	-	-	-	-	-	-	-	-
5	SL%YE	9.1e-15	14	16	8.6e-11	1	0.001	1	0.001	8.6e-05	global-SL%YE	CASSLDYEQYF	TCRBV02-01	TCRBJ02-07	NA	03/0906:HD6_Tscm	1	-	-	-	-	-	-	-	-	-	-	-
5	SL%YE	9.1e-15	14	16	8.6e-11	1	0.001	1	0.001	8.6e-05	global-SL%YE	CASSLDYEQYF	TCRBV06-02	TCRBJ02-07	NA	03/0906:HD6_Tscm	1	-	-	-	-	-	-	-	-	-	-	-
5	SL%YE	9.1e-15	14	16	8.6e-11	1	0.001	1	0.001	8.6e-05	global-SL%YE	CASSLDYEQYF	TCRBV12-03	TCRBJ02-07	NA	03/0906:HD6_Tscm	1	-	-	-	-	-	-	-	-	-	-	-
5	SL%YE	9.1e-15	14	16	8.6e-11	1	0.001	1	0.001	8.6e-05	global-SL%YE	CASSLDYEQYF	TCRBV05-01	TCRBJ02-07	NA	03/0906:HD6_Tscm	1	-	-	-	-	-	-	-	-	-	-	-
5	SL%YE	9.1e-15	14	16	8.6e-11	1	0.001	1	0.001	8.6e-05	global-SL%YE	CASSLDYEQYF	TCRBV28-01	TCRBJ02-07	NA	03/0906:HD6_Tscm	1	-	-	-	-	-	-	-	-	-	-	-
5	SL%YE	9.1e-15	14	16	8.6e-11	1	0.001	1	0.001	8.6e-05	global-SL%YE	CASSLDYEQYF	TCRBV07-02	TCRBJ02-07	NA	03/0906:HD6_Tscm	1	-	-	-	-	-	-	-	-	-	-	-
5	SL%YE	9.1e-15	14	16	8.6e-11	1	0.001	1	0.001	8.6e-05	global-SL%YE	CASSLDYEQYF	TCRBV05-04	TCRBJ02-07	NA	03/0906:HD6_Tscm	1	-	-	-	-	-	-	-	-	-	-	-
5	SL%YE	9.1e-15	14	16	8.6e-11	1	0.001	1	0.001	8.6e-05	global-SL%YE	CASSLGYEQYF	TCRBV05-05	TCRBJ02-07	NA	03/0905:HD5_Tscm	1	-	-	-	-	-	-	-	-	-	-	-
5	SL%YE	9.1e-15	14	16	8.6e-11	1	0.001	1	0.001	8.6e-05	global-SL%YE	CASSLGYEQYF	TCRBV07-09	TCRBJ02-07	NA	03/0905:HD5_Tscm	1	-	-	-	-	-	-	-	-	-	-	-
5	SL%YE	9.1e-15	14	16	8.6e-11	1	0.001	1	0.001	8.6e-05	global-SL%YE	CASSLGYEQYF	TCRBV05-01	TCRBJ02-07	NA	03/0906:HD6_Tscm	1	-	-	-	-	-	-	-	-	-	-	-
5	SL%YE	9.1e-15	14	16	8.6e-11	1	0.001	1	0.001	8.6e-05	global-SL%YE	CASSLGYEQYF	TCRBV07-02	TCRBJ02-05	NA	03/0906:HD6_Tscm	1	-	-	-	-	-	-	-	-	-	-	-
5	SL%YE	9.1e-15	14	16	8.6e-11	1	0.001	1	0.001	8.6e-05	global-SL%YE	CASSLGYEQYF	TCRBV07-08	TCRBJ02-07	NA	03/0906:HD6_Tscm	1	-	-	-	-	-	-	-	-	-	-	-
5	SL%YE	9.1e-15	14	16	8.6e-11	1	0.001	1	0.001	8.6e-05	global-SL%YE	CASSLGYEQYF	TCRBV28-01	TCRBJ02-07	NA	03/0906:HD6_Tscm	1	-	-	-	-	-	-	-	-	-	-	-
5	SL%YE	9.1e-15	14	16	8.6e-11	1	0.001	1	0.001	8.6e-05	global-SL%YE	CASSLGYEQYF	TCRBV12-03	TCRBJ02-07	NA	03/0906:HD6_Tscm	1	-	-	-	-	-	-	-	-	-	-	-
5	SL%YE	9.1e-15	14	16	8.6e-11	1	0.001	1	0.001	8.6e-05	global-SL%YE	CASSLGYEQYF	TCRBV07-02	TCRBJ02-07	NA	03/0906:HD6_Tscm	1	-	-	-	-	-	-	-	-	-	-	-
5	SL%YE	9.1e-15	14	16	8.6e-11	1	0.001	1	0.001	8.6e-05	global-SL%YE	CASSLGYEQYF	TCRBV07-09	TCRBJ02-07	NA	03/0906:HD6_Tscm	1	-	-	-	-	-	-	-	-	-	-	-
5	SL%YE	9.1e-15	14	16	8.6e-11	1	0.001	1	0.001	8.6e-05	global-SL%YE	CASSLGYEQYF	TCRBV07-09	TCRBJ02-07	NA	03/0910:T1D2_Tscm	1	-	-	-	-	-	-	-	-	-	-	-
5	SL%YE	9.1e-15	14	16	8.6e-11	1	0.001	1	0.001	8.6e-05	global-SL%YE	CASSLGYEQYF	TCRBV05-01	TCRBJ02-07	NA	03/0910:T1D2_Tscm	1	-	-	-	-	-	-	-	-	-	-	-
5	SL%YE	9.1e-15	14	16	8.6e-11	1	0.001	1	0.001	8.6e-05	global-SL%YE	CASSLGYEQYF	TCRBV28-01	TCRBJ02-07	NA	03/0912:T1D4_Tscm	1	-	-	-	-	-	-	-	-	-	-	-
5	SL%YE	9.1e-15	14	16	8.6e-11	1	0.001	1	0.001	8.6e-05	global-SL%YE	CASSLGYEQYF	TCRBV03-01	TCRBJ02-07	NA	03/0912:T1D4_Tscm	1	-	-	-	-	-	-	-	-	-	-	-
5	SL%YE	9.1e-15	14	16	8.6e-11	1	0.001	1	0.001	8.6e-05	global-SL%YE	CASSLGYEQYF	TCRBV12-03	TCRBJ02-07	NA	03/0912:T1D4_Tscm	1	-	-	-	-	-	-	-	-	-	-	-
5	SL%YE	9.1e-15	14	16	8.6e-11	1	0.001	1	0.001	8.6e-05	global-SL%YE	CASSLGYEQYF	TCRBV07-02	TCRBJ02-07	NA	03/0912:T1D4_Tscm	1	-	-	-	-	-	-	-	-	-	-	-
5	SL%YE	9.1e-15	14	16	8.6e-11	1	0.001	1	0.001	8.6e-05	global-SL%YE	CASSLGYEQYF	TCRBV12-03	TCRBJ02-07	NA	03/0913:T1D5_Tscm	1	-	-	-	-	-	-	-	-	-	-	-
5	SL%YE	9.1e-15	14	16	8.6e-11	1	0.001	1	0.001	8.6e-05	global-SL%YE	CASSLGYEQYF	TCRBV05-06	TCRBJ02-07	NA	03/0915:T1D7_Tscm	1	-	-	-	-	-	-	-	-	-	-	-
5	SL%YE	9.1e-15	14	16	8.6e-11	1	0.001	1	0.001	8.6e-05	global-SL%YE	CASSLGYEQYF	TCRBV11-02	TCRBJ02-07	NA	03/0915:T1D7_Tscm	1	-	-	-	-	-	-	-	-	-	-	-
5	SL%YE	9.1e-15	14	16	8.6e-11	1	0.001	1	0.001	8.6e-05	global-SL%YE	CASSLGYEQYF	TCRBV18-01	TCRBJ02-07	NA	03/0915:T1D7_Tscm	1	-	-	-	-	-	-	-	-	-	-	-
5	SL%YE	9.1e-15	14	16	8.6e-11	1	0.001	1	0.001	8.6e-05	global-SL%YE	CASSLGYEQYF	TCRBV05-01	TCRBJ02-07	NA	03/0915:T1D7_Tscm	1	-	-	-	-	-	-	-	-	-	-	-
5	SL%YE	9.1e-15	14	16	8.6e-11	1	0.001	1	0.001	8.6e-05	global-SL%YE	CASSLGYEQYF	TCRBV12-03	TCRBJ02-07	NA	03/0915:T1D7_Tscm	1	-	-	-	-	-	-	-	-	-	-	-
5	SL%YE	9.1e-15	14	16	8.6e-11	1	0.001	1	0.001	8.6e-05	global-SL%YE	CASSLGYEQYF	TCRBV07-09	TCRBJ02-07	NA	03/0915:T1D7_Tscm	1	-	-	-	-	-	-	-	-	-	-	-
5	SL%YE	9.1e-15	14	16	8.6e-11	1	0.001	1	0.001	8.6e-05	global-SL%YE	CASSLGYEQYF	TCRBV07-09	TCRBJ02-07	NA	03/0916:T1D8_Tscm	1	-	-	-	-	-	-	-	-	-	-	-
5	SL%YE	9.1e-15	14	16	8.6e-11	1	0.001	1	0.001	8.6e-05	global-SL%YE	CASSLGYEQYF	TCRBV11-02	TCRBJ02-05	NA	03/0916:T1D8_Tscm	1	-	-	-	-	-	-	-	-	-	-	-
5	SL%YE	9.1e-15	14	16	8.6e-11	1	0.001	1	0.001	8.6e-05	global-SL%YE	CASSLGYEQYF	TCRBV05-04	TCRBJ02-05	NA	03/0916:T1D8_Tscm	1	-	-	-	-	-	-	-	-	-	-	-
5	SL%YE	9.1e-15	14	16	8.6e-11	1	0.001	1	0.001	8.6e-05	global-SL%YE	CASSLGYEQYF	TCRBV12-03	TCRBJ02-07	NA	03/0916:T1D8_Tscm	1	-	-	-	-	-	-	-	-	-	-	-
5	SL%YE	9.1e-15	14	16	8.6e-11	1	0.001	1	0.001	8.6e-05	global-SL%YE	CASSLGYEQYF	TCRBV11-02	TCRBJ02-07	NA	03/0916:T1D8_Tscm	1	-	-	-	-	-	-	-	-	-	-	-
5	SL%YE	9.1e-15	14	16	8.6e-11	1	0.001	1	0.001	8.6e-05	global-SL%YE	CASSLGYEQYF	TCRBV05-04	TCRBJ02-07	NA	03/0916:T1D8_Tscm	1	-	-	-	-	-	-	-	-	-	-	-
5	SL%YE	9.1e-15	14	16	8.6e-11	1	0.001	1	0.001	8.6e-05	global-SL%YE	CASSLGYEQYF	TCRBV27-01	TCRBJ02-07	NA	03/0916:T1D8_Tscm	1	-	-	-	-	-	-	-	-	-	-	-
5	SL%YE	9.1e-15	14	16	8.6e-11	1	0.001	1	0.001	8.6e-05	global-SL%YE	CASSLGYEQYF	TCRBV07-02	TCRBJ02-07	NA	03/0916:T1D8_Tscm	1	-	-	-	-	-	-	-	-	-	-	-
5	SL%YE	9.1e-15	14	16	8.6e-11	1	0.001	1	0.001	8.6e-05	global-SL%YE	CASSLTYEQYF	TCRBV07-08	TCRBJ02-07	NA	03/0906:HD6_Tscm	1	-	-	-	-	-	-	-	-	-	-	-
5	SL%YE	9.1e-15	14	16	8.6e-11	1	0.001	1	0.001	8.6e-05	global-SL%YE	CASSLTYEQYF	TCRBV12-03	TCRBJ02-07	NA	03/0906:HD6_Tscm	1	-	-	-	-	-	-	-	-	-	-	-
5	SL%YE	9.1e-15	14	16	8.6e-11	1	0.001	1	0.001	8.6e-05	global-SL%YE	CASSLTYEQYF	TCRBV05-06	TCRBJ02-07	NA	03/0906:HD6_Tscm	1	-	-	-	-	-	-	-	-	-	-	-
5	SL%YE	9.1e-15	14	16	8.6e-11	1	0.001	1	0.001	8.6e-05	global-SL%YE	CASSLTYEQYF	TCRBV07-09	TCRBJ02-07	NA	03/0906:HD6_Tscm	1	-	-	-	-	-	-	-	-	-	-	-
5	SL%YE	9.1e-15	14	16	8.6e-11	1	0.001	1	0.001	8.6e-05	global-SL%YE	CASSLTYEQYF	TCRBV07-02	TCRBJ02-07	NA	03/0906:HD6_Tscm	1	-	-	-	-	-	-	-	-	-	-	-
5	SL%YE	9.1e-15	14	16	8.6e-11	1	0.001	1	0.001	8.6e-05	global-SL%YE	CASSLTYEQYF	TCRBV28-01	TCRBJ02-07	NA	03/0906:HD6_Tscm	1	-	-	-	-	-	-	-	-	-	-	-
5	SL%YE	9.1e-15	14	16	8.6e-11	1	0.001	1	0.001	8.6e-05	global-SL%YE	CASSLTYEQYF	TCRBV06-02	TCRBJ02-07	NA	03/0906:HD6_Tscm	1	-	-	-	-	-	-	-	-	-	-	-
5	SL%YE	9.1e-15	14	16	8.6e-11	1	0.001	1	0.001	8.6e-05	global-SL%YE	CASSLTYEQYF	TCRBV28-01	TCRBJ02-07	NA	03/0907:HD7_Tscm	1	-	-	-	-	-	-	-	-	-	-	-
5	SL%YE	9.1e-15	14	16	8.6e-11	1	0.001	1	0.001	8.6e-05	global-SL%YE	CASSLTYEQYF	TCRBV12-03	TCRBJ02-05	NA	03/0907:HD7_Tscm	1	-	-	-	-	-	-	-	-	-	-	-
5	SL%YE	9.1e-15	14	16	8.6e-11	1	0.001	1	0.001	8.6e-05	global-SL%YE	CASSLTYEQYF	TCRBV07-08	TCRBJ02-07	NA	03/0907:HD7_Tscm	1	-	-	-	-	-	-	-	-	-	-	-
5	SL%YE	9.1e-15	14	16	8.6e-11	1	0.001	1	0.001	8.6e-05	global-SL%YE	CASSLTYEQYF	TCRBV02-01	TCRBJ02-07	NA	03/0907:HD7_Tscm	1	-	-	-	-	-	-	-	-	-	-	-
5	SL%YE	9.1e-15	14	16	8.6e-11	1	0.001	1	0.001	8.6e-05	global-SL%YE	CASSLTYEQYF	TCRBV05-06	TCRBJ02-07	NA	03/0907:HD7_Tscm	1	-	-	-	-	-	-	-	-	-	-	-
5	SL%YE	9.1e-15	14	16	8.6e-11	1	0.001	1	0.001	8.6e-05	global-SL%YE	CASSLTYEQYF	TCRBV07-06	TCRBJ02-07	NA	03/0907:HD7_Tscm	1	-	-	-	-	-	-	-	-	-	-	-
5	SL%YE	9.1e-15	14	16	8.6e-11	1	0.001	1	0.001	8.6e-05	global-SL%YE	CASSLTYEQYF	TCRBV14-01	TCRBJ02-07	NA	03/0907:HD7_Tscm	1	-	-	-	-	-	-	-	-	-	-	-
5	SL%YE	9.1e-15	14	16	8.6e-11	1	0.001	1	0.001	8.6e-05	global-SL%YE	CASSLTYEQYF	TCRBV12-03	TCRBJ02-07	NA	03/0907:HD7_Tscm	1	-	-	-	-	-	-	-	-	-	-	-
5	SL%YE	9.1e-15	14	16	8.6e-11	1	0.001	1	0.001	8.6e-05	global-SL%YE	CASSLTYEQYF	TCRBV07-02	TCRBJ02-07	NA	03/0907:HD7_Tscm	1	-	-	-	-	-	-	-	-	-	-	-
5	SL%YE	9.1e-15	14	16	8.6e-11	1	0.001	1	0.001	8.6e-05	global-SL%YE	CASSLTYEQYF	TCRBV05-01	TCRBJ02-07	NA	03/0915:T1D7_Tscm	1	-	-	-	-	-	-	-	-	-	-	-
5	SL%YE	9.1e-15	14	16	8.6e-11	1	0.001	1	0.001	8.6e-05	global-SL%YE	CASSLTYEQYF	TCRBV07-02	TCRBJ02-07	NA	03/0915:T1D7_Tscm	1	-	-	-	-	-	-	-	-	-	-	-
5	SL%YE	9.1e-15	14	16	8.6e-11	1	0.001	1	0.001	8.6e-05	global-SL%YE	CASSLTYEQYF	TCRBV28-01	TCRBJ02-07	NA	03/0915:T1D7_Tscm	1	-	-	-	-	-	-	-	-	-	-	-
5	SL%YE	9.1e-15	14	16	8.6e-11	1	0.001	1	0.001	8.6e-05	global-SL%YE	CASSLRYEQYF	TCRBV07-02	TCRBJ02-07	NA	03/0902:HD2_Tscm	1	-	-	-	-	-	-	-	-	-	-	-
5	SL%YE	9.1e-15	14	16	8.6e-11	1	0.001	1	0.001	8.6e-05	global-SL%YE	CASSLRYEQYF	TCRBV12-03	TCRBJ02-07	NA	03/0902:HD2_Tscm	1	-	-	-	-	-	-	-	-	-	-	-
5	SL%YE	9.1e-15	14	16	8.6e-11	1	0.001	1	0.001	8.6e-05	global-SL%YE	CASSLRYEQYF	TCRBV28-01	TCRBJ02-07	NA	03/0902:HD2_Tscm	1	-	-	-	-	-	-	-	-	-	-	-
5	SL%YE	9.1e-15	14	16	8.6e-11	1	0.001	1	0.001	8.6e-05	global-SL%YE	CASSLRYEQYF	TCRBV07-09	TCRBJ02-07	NA	03/0902:HD2_Tscm	1	-	-	-	-	-	-	-	-	-	-	-
5	SL%YE	9.1e-15	14	16	8.6e-11	1	0.001	1	0.001	8.6e-05	global-SL%YE	CASSLRYEQYF	TCRBV28-01	TCRBJ02-05	NA	03/0904:HD4_Tscm	1	-	-	-	-	-	-	-	-	-	-	-
5	SL%YE	9.1e-15	14	16	8.6e-11	1	0.001	1	0.001	8.6e-05	global-SL%YE	CASSLRYEQYF	TCRBV07-02	TCRBJ02-07	NA	03/0904:HD4_Tscm	1	-	-	-	-	-	-	-	-	-	-	-
5	SL%YE	9.1e-15	14	16	8.6e-11	1	0.001	1	0.001	8.6e-05	global-SL%YE	CASSLRYEQYF	TCRBV28-01	TCRBJ02-07	NA	03/0904:HD4_Tscm	1	-	-	-	-	-	-	-	-	-	-	-
5	SL%YE	9.1e-15	14	16	8.6e-11	1	0.001	1	0.001	8.6e-05	global-SL%YE	CASSLRYEQYF	TCRBV07-02	TCRBJ02-07	NA	03/0906:HD6_Tscm	1	-	-	-	-	-	-	-	-	-	-	-
5	SL%YE	9.1e-15	14	16	8.6e-11	1	0.001	1	0.001	8.6e-05	global-SL%YE	CASSLRYEQYF	TCRBV12-03	TCRBJ02-07	NA	03/0906:HD6_Tscm	1	-	-	-	-	-	-	-	-	-	-	-
5	SL%YE	9.1e-15	14	16	8.6e-11	1	0.001	1	0.001	8.6e-05	global-SL%YE	CASSLRYEQYF	TCRBV28-01	TCRBJ02-07	NA	03/0906:HD6_Tscm	1	-	-	-	-	-	-	-	-	-	-	-
6	S%YNE	9.7e-15	14	14	2.1e-08	1	0.28	1	0.001	7.4e-05	global-S%YNE	CASSQYNEQFF	TCRBV07-02	TCRBJ02-01	NA	03/0904:HD4_Tscm	1	-	-	-	-	-	-	-	-	-	-	-
6	S%YNE	9.7e-15	14	14	2.1e-08	1	0.28	1	0.001	7.4e-05	global-S%YNE	CASSQYNEQFF	TCRBV07-09	TCRBJ02-01	NA	03/0904:HD4_Tscm	1	-	-	-	-	-	-	-	-	-	-	-
6	S%YNE	9.7e-15	14	14	2.1e-08	1	0.28	1	0.001	7.4e-05	global-S%YNE	CASSQYNEQFF	TCRBV02-01	TCRBJ02-01	NA	03/0907:HD7_Tscm	1	-	-	-	-	-	-	-	-	-	-	-
6	S%YNE	9.7e-15	14	14	2.1e-08	1	0.28	1	0.001	7.4e-05	global-S%YNE	CASSQYNEQFF	TCRBV07-09	TCRBJ02-01	NA	03/0907:HD7_Tscm	1	-	-	-	-	-	-	-	-	-	-	-
6	S%YNE	9.7e-15	14	14	2.1e-08	1	0.28	1	0.001	7.4e-05	global-S%YNE	CASSQYNEQFF	TCRBV19-01	TCRBJ02-01	NA	03/0907:HD7_Tscm	1	-	-	-	-	-	-	-	-	-	-	-
6	S%YNE	9.7e-15	14	14	2.1e-08	1	0.28	1	0.001	7.4e-05	global-S%YNE	CASSQYNEQFF	TCRBV09-01	TCRBJ02-01	NA	03/0912:T1D4_Tscm	1	-	-	-	-	-	-	-	-	-	-	-
6	S%YNE	9.7e-15	14	14	2.1e-08	1	0.28	1	0.001	7.4e-05	global-S%YNE	CASSQYNEQFF	TCRBV06-06	TCRBJ02-01	NA	03/0912:T1D4_Tscm	1	-	-	-	-	-	-	-	-	-	-	-
6	S%YNE	9.7e-15	14	14	2.1e-08	1	0.28	1	0.001	7.4e-05	global-S%YNE	CASSQYNEQFF	TCRBV03-01	TCRBJ02-01	NA	03/0912:T1D4_Tscm	1	-	-	-	-	-	-	-	-	-	-	-
6	S%YNE	9.7e-15	14	14	2.1e-08	1	0.28	1	0.001	7.4e-05	global-S%YNE	CASSQYNEQFF	TCRBV04-03	TCRBJ02-01	NA	03/0916:T1D8_Tscm	1	-	-	-	-	-	-	-	-	-	-	-
6	S%YNE	9.7e-15	14	14	2.1e-08	1	0.28	1	0.001	7.4e-05	global-S%YNE	CASSQYNEQFF	TCRBV04-01	TCRBJ02-01	NA	03/0916:T1D8_Tscm	1	-	-	-	-	-	-	-	-	-	-	-
6	S%YNE	9.7e-15	14	14	2.1e-08	1	0.28	1	0.001	7.4e-05	global-S%YNE	CAWSNYNEQFF	TCRBV30-01	TCRBJ02-01	NA	03/0903:HD3_Tscm	1	-	-	-	-	-	-	-	-	-	-	-
6	S%YNE	9.7e-15	14	14	2.1e-08	1	0.28	1	0.001	7.4e-05	global-S%YNE	CASSEYNEQFF	TCRBV28-01	TCRBJ02-01	NA	03/0904:HD4_Tscm	1	-	-	-	-	-	-	-	-	-	-	-
6	S%YNE	9.7e-15	14	14	2.1e-08	1	0.28	1	0.001	7.4e-05	global-S%YNE	CASSEYNEQFF	TCRBV12-03	TCRBJ02-01	NA	03/0904:HD4_Tscm	1	-	-	-	-	-	-	-	-	-	-	-
6	S%YNE	9.7e-15	14	14	2.1e-08	1	0.28	1	0.001	7.4e-05	global-S%YNE	CASSVYNEQFF	TCRBV09-01	TCRBJ02-01	NA	03/0915:T1D7_Tscm	1	-	-	-	-	-	-	-	-	-	-	-
6	S%YNE	9.7e-15	14	14	2.1e-08	1	0.28	1	0.001	7.4e-05	global-S%YNE	CASSVYNEQFF	TCRBV02-01	TCRBJ02-01	NA	03/0915:T1D7_Tscm	1	-	-	-	-	-	-	-	-	-	-	-
6	S%YNE	9.7e-15	14	14	2.1e-08	1	0.28	1	0.001	7.4e-05	global-S%YNE	CASSTYNEQFF	TCRBV12-03	TCRBJ02-01	NA	03/0911:T1D3_Tscm	1	-	-	-	-	-	-	-	-	-	-	-
6	S%YNE	9.7e-15	14	14	2.1e-08	1	0.28	1	0.001	7.4e-05	global-S%YNE	CASSAYNEQFF	TCRBV07-02	TCRBJ02-01	NA	03/0902:HD2_Tscm	1	-	-	-	-	-	-	-	-	-	-	-
6	S%YNE	9.7e-15	14	14	2.1e-08	1	0.28	1	0.001	7.4e-05	global-S%YNE	CASSAYNEQFF	TCRBV02-01	TCRBJ02-01	NA	03/0902:HD2_Tscm	1	-	-	-	-	-	-	-	-	-	-	-
6	S%YNE	9.7e-15	14	14	2.1e-08	1	0.28	1	0.001	7.4e-05	global-S%YNE	CASSAYNEQFF	TCRBV12-03	TCRBJ02-01	NA	03/0902:HD2_Tscm	1	-	-	-	-	-	-	-	-	-	-	-
6	S%YNE	9.7e-15	14	14	2.1e-08	1	0.28	1	0.001	7.4e-05	global-S%YNE	CASSAYNEQFF	TCRBV07-03	TCRBJ02-01	NA	03/0915:T1D7_Tscm	1	-	-	-	-	-	-	-	-	-	-	-
6	S%YNE	9.7e-15	14	14	2.1e-08	1	0.28	1	0.001	7.4e-05	global-S%YNE	CASSAYNEQFF	TCRBV05-01	TCRBJ02-01	NA	03/0915:T1D7_Tscm	1	-	-	-	-	-	-	-	-	-	-	-
6	S%YNE	9.7e-15	14	14	2.1e-08	1	0.28	1	0.001	7.4e-05	global-S%YNE	CASSAYNEQFF	TCRBV12-03	TCRBJ02-01	NA	03/0915:T1D7_Tscm	1	-	-	-	-	-	-	-	-	-	-	-
6	S%YNE	9.7e-15	14	14	2.1e-08	1	0.28	1	0.001	7.4e-05	global-S%YNE	CASSLYNEQFF	TCRBV14-01	TCRBJ02-01	NA	03/0904:HD4_Tscm	1	-	-	-	-	-	-	-	-	-	-	-
6	S%YNE	9.7e-15	14	14	2.1e-08	1	0.28	1	0.001	7.4e-05	global-S%YNE	CASSLYNEQFF	TCRBV19-01	TCRBJ02-01	NA	03/0904:HD4_Tscm	1	-	-	-	-	-	-	-	-	-	-	-
6	S%YNE	9.7e-15	14	14	2.1e-08	1	0.28	1	0.001	7.4e-05	global-S%YNE	CASSLYNEQFF	TCRBV06-05	TCRBJ02-01	NA	03/0904:HD4_Tscm	1	-	-	-	-	-	-	-	-	-	-	-
6	S%YNE	9.7e-15	14	14	2.1e-08	1	0.28	1	0.001	7.4e-05	global-S%YNE	CASSLYNEQFF	TCRBV12-03	TCRBJ02-01	NA	03/0904:HD4_Tscm	1	-	-	-	-	-	-	-	-	-	-	-
6	S%YNE	9.7e-15	14	14	2.1e-08	1	0.28	1	0.001	7.4e-05	global-S%YNE	CASSLYNEQFF	TCRBV07-08	TCRBJ02-01	NA	03/0906:HD6_Tscm	1	-	-	-	-	-	-	-	-	-	-	-
6	S%YNE	9.7e-15	14	14	2.1e-08	1	0.28	1	0.001	7.4e-05	global-S%YNE	CASSLYNEQFF	TCRBV19-01	TCRBJ02-01	NA	03/0906:HD6_Tscm	1	-	-	-	-	-	-	-	-	-	-	-
6	S%YNE	9.7e-15	14	14	2.1e-08	1	0.28	1	0.001	7.4e-05	global-S%YNE	CASSLYNEQFF	TCRBV14-01	TCRBJ02-01	NA	03/0906:HD6_Tscm	1	-	-	-	-	-	-	-	-	-	-	-
6	S%YNE	9.7e-15	14	14	2.1e-08	1	0.28	1	0.001	7.4e-05	global-S%YNE	CASSLYNEQFF	TCRBV02-01	TCRBJ02-01	NA	03/0906:HD6_Tscm	1	-	-	-	-	-	-	-	-	-	-	-
6	S%YNE	9.7e-15	14	14	2.1e-08	1	0.28	1	0.001	7.4e-05	global-S%YNE	CASSLYNEQFF	TCRBV28-01	TCRBJ02-01	NA	03/0906:HD6_Tscm	1	-	-	-	-	-	-	-	-	-	-	-
6	S%YNE	9.7e-15	14	14	2.1e-08	1	0.28	1	0.001	7.4e-05	global-S%YNE	CASSLYNEQFF	TCRBV05-01	TCRBJ02-01	NA	03/0906:HD6_Tscm	1	-	-	-	-	-	-	-	-	-	-	-
6	S%YNE	9.7e-15	14	14	2.1e-08	1	0.28	1	0.001	7.4e-05	global-S%YNE	CASSLYNEQFF	TCRBV05-06	TCRBJ02-01	NA	03/0906:HD6_Tscm	1	-	-	-	-	-	-	-	-	-	-	-
6	S%YNE	9.7e-15	14	14	2.1e-08	1	0.28	1	0.001	7.4e-05	global-S%YNE	CASSLYNEQFF	TCRBV28-01	TCRBJ02-01	NA	03/0907:HD7_Tscm	1	-	-	-	-	-	-	-	-	-	-	-
6	S%YNE	9.7e-15	14	14	2.1e-08	1	0.28	1	0.001	7.4e-05	global-S%YNE	CASSLYNEQFF	TCRBV07-02	TCRBJ02-01	NA	03/0907:HD7_Tscm	1	-	-	-	-	-	-	-	-	-	-	-
6	S%YNE	9.7e-15	14	14	2.1e-08	1	0.28	1	0.001	7.4e-05	global-S%YNE	CASSLYNEQFF	TCRBV12-03	TCRBJ02-01	NA	03/0907:HD7_Tscm	1	-	-	-	-	-	-	-	-	-	-	-
6	S%YNE	9.7e-15	14	14	2.1e-08	1	0.28	1	0.001	7.4e-05	global-S%YNE	CASSLYNEQFF	TCRBV11-03	TCRBJ02-01	NA	03/0910:T1D2_Tscm	1	-	-	-	-	-	-	-	-	-	-	-
6	S%YNE	9.7e-15	14	14	2.1e-08	1	0.28	1	0.001	7.4e-05	global-S%YNE	CASSLYNEQFF	TCRBV14-01	TCRBJ02-01	NA	03/0910:T1D2_Tscm	1	-	-	-	-	-	-	-	-	-	-	-
6	S%YNE	9.7e-15	14	14	2.1e-08	1	0.28	1	0.001	7.4e-05	global-S%YNE	CASSLYNEQFF	TCRBV05-01	TCRBJ02-01	NA	03/0910:T1D2_Tscm	1	-	-	-	-	-	-	-	-	-	-	-
6	S%YNE	9.7e-15	14	14	2.1e-08	1	0.28	1	0.001	7.4e-05	global-S%YNE	CASSLYNEQFF	TCRBV07-02	TCRBJ02-01	NA	03/0915:T1D7_Tscm	1	-	-	-	-	-	-	-	-	-	-	-
6	S%YNE	9.7e-15	14	14	2.1e-08	1	0.28	1	0.001	7.4e-05	global-S%YNE	CASSLYNEQFF	TCRBV03-01	TCRBJ02-01	NA	03/0915:T1D7_Tscm	1	-	-	-	-	-	-	-	-	-	-	-
6	S%YNE	9.7e-15	14	14	2.1e-08	1	0.28	1	0.001	7.4e-05	global-S%YNE	CASSLYNEQFF	TCRBV10-02	TCRBJ02-01	NA	03/0915:T1D7_Tscm	1	-	-	-	-	-	-	-	-	-	-	-
6	S%YNE	9.7e-15	14	14	2.1e-08	1	0.28	1	0.001	7.4e-05	global-S%YNE	CASSLYNEQFF	TCRBV05-05	TCRBJ02-01	NA	03/0915:T1D7_Tscm	1	-	-	-	-	-	-	-	-	-	-	-
6	S%YNE	9.7e-15	14	14	2.1e-08	1	0.28	1	0.001	7.4e-05	global-S%YNE	CASSLYNEQFF	TCRBV07-06	TCRBJ02-01	NA	03/0915:T1D7_Tscm	1	-	-	-	-	-	-	-	-	-	-	-
6	S%YNE	9.7e-15	14	14	2.1e-08	1	0.28	1	0.001	7.4e-05	global-S%YNE	CASSLYNEQFF	TCRBV02-01	TCRBJ02-01	NA	03/0915:T1D7_Tscm	1	-	-	-	-	-	-	-	-	-	-	-
6	S%YNE	9.7e-15	14	14	2.1e-08	1	0.28	1	0.001	7.4e-05	global-S%YNE	CASSLYNEQFF	TCRBV05-06	TCRBJ02-01	NA	03/0915:T1D7_Tscm	1	-	-	-	-	-	-	-	-	-	-	-
6	S%YNE	9.7e-15	14	14	2.1e-08	1	0.28	1	0.001	7.4e-05	global-S%YNE	CASSLYNEQFF	TCRBV18-01	TCRBJ02-01	NA	03/0915:T1D7_Tscm	1	-	-	-	-	-	-	-	-	-	-	-
6	S%YNE	9.7e-15	14	14	2.1e-08	1	0.28	1	0.001	7.4e-05	global-S%YNE	CASSLYNEQFF	TCRBV06-02	TCRBJ02-01	NA	03/0916:T1D8_Tscm	1	-	-	-	-	-	-	-	-	-	-	-
6	S%YNE	9.7e-15	14	14	2.1e-08	1	0.28	1	0.001	7.4e-05	global-S%YNE	CASSLYNEQFF	TCRBV07-09	TCRBJ02-01	NA	03/0916:T1D8_Tscm	1	-	-	-	-	-	-	-	-	-	-	-
6	S%YNE	9.7e-15	14	14	2.1e-08	1	0.28	1	0.001	7.4e-05	global-S%YNE	CASSLYNEQFF	TCRBV03-01	TCRBJ02-01	NA	03/0916:T1D8_Tscm	1	-	-	-	-	-	-	-	-	-	-	-
6	S%YNE	9.7e-15	14	14	2.1e-08	1	0.28	1	0.001	7.4e-05	global-S%YNE	CASSIYNEQFF	TCRBV19-01	TCRBJ02-01	NA	03/0903:HD3_Tscm	1	-	-	-	-	-	-	-	-	-	-	-
6	S%YNE	9.7e-15	14	14	2.1e-08	1	0.28	1	0.001	7.4e-05	global-S%YNE	CASSIYNEQFF	TCRBV21-01	TCRBJ02-01	NA	03/0903:HD3_Tscm	1	-	-	-	-	-	-	-	-	-	-	-
6	S%YNE	9.7e-15	14	14	2.1e-08	1	0.28	1	0.001	7.4e-05	global-S%YNE	CASSRYNEQFF	TCRBV07-06	TCRBJ02-01	NA	03/0902:HD2_Tscm	1	-	-	-	-	-	-	-	-	-	-	-
6	S%YNE	9.7e-15	14	14	2.1e-08	1	0.28	1	0.001	7.4e-05	global-S%YNE	CASSRYNEQFF	TCRBV28-01	TCRBJ02-01	NA	03/0902:HD2_Tscm	1	-	-	-	-	-	-	-	-	-	-	-
6	S%YNE	9.7e-15	14	14	2.1e-08	1	0.28	1	0.001	7.4e-05	global-S%YNE	CASSRYNEQFF	TCRBV07-09	TCRBJ02-01	NA	03/0902:HD2_Tscm	1	-	-	-	-	-	-	-	-	-	-	-
6	S%YNE	9.7e-15	14	14	2.1e-08	1	0.28	1	0.001	7.4e-05	global-S%YNE	CASSRYNEQFF	TCRBV04-02	TCRBJ02-01	NA	03/0915:T1D7_Tscm	1	-	-	-	-	-	-	-	-	-	-	-
6	S%YNE	9.7e-15	14	14	2.1e-08	1	0.28	1	0.001	7.4e-05	global-S%YNE	CASSRYNEQFF	TCRBV07-09	TCRBJ02-01	NA	03/0915:T1D7_Tscm	1	-	-	-	-	-	-	-	-	-	-	-
6	S%YNE	9.7e-15	14	14	2.1e-08	1	0.28	1	0.001	7.4e-05	global-S%YNE	CASSRYNEQFF	TCRBV03-01	TCRBJ02-01	NA	03/0915:T1D7_Tscm	1	-	-	-	-	-	-	-	-	-	-	-
6	S%YNE	9.7e-15	14	14	2.1e-08	1	0.28	1	0.001	7.4e-05	global-S%YNE	CASSFYNEQFF	TCRBV05-01	TCRBJ02-01	NA	03/0902:HD2_Tscm	1	-	-	-	-	-	-	-	-	-	-	-
6	S%YNE	9.7e-15	14	14	2.1e-08	1	0.28	1	0.001	7.4e-05	global-S%YNE	CASSFYNEQFF	TCRBV12-03	TCRBJ02-01	NA	03/0902:HD2_Tscm	1	-	-	-	-	-	-	-	-	-	-	-
6	S%YNE	9.7e-15	14	14	2.1e-08	1	0.28	1	0.001	7.4e-05	global-S%YNE	CASSFYNEQFF	TCRBV11-03	TCRBJ02-01	NA	03/0902:HD2_Tscm	1	-	-	-	-	-	-	-	-	-	-	-
6	S%YNE	9.7e-15	14	14	2.1e-08	1	0.28	1	0.001	7.4e-05	global-S%YNE	CASSFYNEQFF	TCRBV05-04	TCRBJ02-01	NA	03/0902:HD2_Tscm	1	-	-	-	-	-	-	-	-	-	-	-
6	S%YNE	9.7e-15	14	14	2.1e-08	1	0.28	1	0.001	7.4e-05	global-S%YNE	CASSFYNEQFF	TCRBV27-01	TCRBJ02-01	NA	03/0902:HD2_Tscm	1	-	-	-	-	-	-	-	-	-	-	-
6	S%YNE	9.7e-15	14	14	2.1e-08	1	0.28	1	0.001	7.4e-05	global-S%YNE	CASSFYNEQFF	TCRBV06-02	TCRBJ02-01	NA	03/0902:HD2_Tscm	1	-	-	-	-	-	-	-	-	-	-	-
6	S%YNE	9.7e-15	14	14	2.1e-08	1	0.28	1	0.001	7.4e-05	global-S%YNE	CASSFYNEQFF	TCRBV07-02	TCRBJ02-01	NA	03/0904:HD4_Tscm	1	-	-	-	-	-	-	-	-	-	-	-
6	S%YNE	9.7e-15	14	14	2.1e-08	1	0.28	1	0.001	7.4e-05	global-S%YNE	CASSFYNEQFF	TCRBV07-09	TCRBJ02-01	NA	03/0904:HD4_Tscm	1	-	-	-	-	-	-	-	-	-	-	-
6	S%YNE	9.7e-15	14	14	2.1e-08	1	0.28	1	0.001	7.4e-05	global-S%YNE	CASSFYNEQFF	TCRBV28-01	TCRBJ02-01	NA	03/0906:HD6_Tscm	1	-	-	-	-	-	-	-	-	-	-	-
6	S%YNE	9.7e-15	14	14	2.1e-08	1	0.28	1	0.001	7.4e-05	global-S%YNE	CASSFYNEQFF	TCRBV27-01	TCRBJ02-01	NA	03/0906:HD6_Tscm	1	-	-	-	-	-	-	-	-	-	-	-
6	S%YNE	9.7e-15	14	14	2.1e-08	1	0.28	1	0.001	7.4e-05	global-S%YNE	CASSFYNEQFF	TCRBV05-04	TCRBJ02-01	NA	03/0906:HD6_Tscm	1	-	-	-	-	-	-	-	-	-	-	-
6	S%YNE	9.7e-15	14	14	2.1e-08	1	0.28	1	0.001	7.4e-05	global-S%YNE	CASSFYNEQFF	TCRBV12-03	TCRBJ02-01	NA	03/0906:HD6_Tscm	1	-	-	-	-	-	-	-	-	-	-	-
6	S%YNE	9.7e-15	14	14	2.1e-08	1	0.28	1	0.001	7.4e-05	global-S%YNE	CASSFYNEQFF	TCRBV05-01	TCRBJ02-01	NA	03/0906:HD6_Tscm	1	-	-	-	-	-	-	-	-	-	-	-
6	S%YNE	9.7e-15	14	14	2.1e-08	1	0.28	1	0.001	7.4e-05	global-S%YNE	CASSFYNEQFF	TCRBV07-09	TCRBJ02-01	NA	03/0906:HD6_Tscm	1	-	-	-	-	-	-	-	-	-	-	-
6	S%YNE	9.7e-15	14	14	2.1e-08	1	0.28	1	0.001	7.4e-05	global-S%YNE	CASSFYNEQFF	TCRBV05-04	TCRBJ02-01	NA	03/0907:HD7_Tscm	1	-	-	-	-	-	-	-	-	-	-	-
6	S%YNE	9.7e-15	14	14	2.1e-08	1	0.28	1	0.001	7.4e-05	global-S%YNE	CASSFYNEQFF	TCRBV06-02	TCRBJ02-01	NA	03/0907:HD7_Tscm	1	-	-	-	-	-	-	-	-	-	-	-
6	S%YNE	9.7e-15	14	14	2.1e-08	1	0.28	1	0.001	7.4e-05	global-S%YNE	CASSFYNEQFF	TCRBV12-03	TCRBJ02-01	NA	03/0907:HD7_Tscm	1	-	-	-	-	-	-	-	-	-	-	-
6	S%YNE	9.7e-15	14	14	2.1e-08	1	0.28	1	0.001	7.4e-05	global-S%YNE	CASSFYNEQFF	TCRBV05-06	TCRBJ02-01	NA	03/0907:HD7_Tscm	1	-	-	-	-	-	-	-	-	-	-	-
6	S%YNE	9.7e-15	14	14	2.1e-08	1	0.28	1	0.001	7.4e-05	global-S%YNE	CASSFYNEQFF	TCRBV09-01	TCRBJ02-01	NA	03/0908:HD8_Tscm	1	-	-	-	-	-	-	-	-	-	-	-
6	S%YNE	9.7e-15	14	14	2.1e-08	1	0.28	1	0.001	7.4e-05	global-S%YNE	CASSFYNEQFF	TCRBV07-02	TCRBJ02-01	NA	03/0908:HD8_Tscm	1	-	-	-	-	-	-	-	-	-	-	-
6	S%YNE	9.7e-15	14	14	2.1e-08	1	0.28	1	0.001	7.4e-05	global-S%YNE	CASSFYNEQFF	TCRBV11-02	TCRBJ02-01	NA	03/0909:T1D1_Tscm	1	-	-	-	-	-	-	-	-	-	-	-
6	S%YNE	9.7e-15	14	14	2.1e-08	1	0.28	1	0.001	7.4e-05	global-S%YNE	CASSFYNEQFF	TCRBV12-03	TCRBJ02-01	NA	03/0909:T1D1_Tscm	1	-	-	-	-	-	-	-	-	-	-	-
6	S%YNE	9.7e-15	14	14	2.1e-08	1	0.28	1	0.001	7.4e-05	global-S%YNE	CASSFYNEQFF	TCRBV05-06	TCRBJ02-01	NA	03/0910:T1D2_Tscm	1	-	-	-	-	-	-	-	-	-	-	-
6	S%YNE	9.7e-15	14	14	2.1e-08	1	0.28	1	0.001	7.4e-05	global-S%YNE	CASSFYNEQFF	TCRBV12-03	TCRBJ02-01	NA	03/0911:T1D3_Tscm	1	-	-	-	-	-	-	-	-	-	-	-
6	S%YNE	9.7e-15	14	14	2.1e-08	1	0.28	1	0.001	7.4e-05	global-S%YNE	CASSFYNEQFF	TCRBV05-01	TCRBJ02-01	NA	03/0915:T1D7_Tscm	1	-	-	-	-	-	-	-	-	-	-	-
6	S%YNE	9.7e-15	14	14	2.1e-08	1	0.28	1	0.001	7.4e-05	global-S%YNE	CASSFYNEQFF	TCRBV06-05	TCRBJ02-01	NA	03/0915:T1D7_Tscm	1	-	-	-	-	-	-	-	-	-	-	-
6	S%YNE	9.7e-15	14	14	2.1e-08	1	0.28	1	0.001	7.4e-05	global-S%YNE	CASSFYNEQFF	TCRBV19-01	TCRBJ02-01	NA	03/0915:T1D7_Tscm	1	-	-	-	-	-	-	-	-	-	-	-
6	S%YNE	9.7e-15	14	14	2.1e-08	1	0.28	1	0.001	7.4e-05	global-S%YNE	CASSFYNEQFF	TCRBV07-02	TCRBJ02-01	NA	03/0915:T1D7_Tscm	1	-	-	-	-	-	-	-	-	-	-	-
6	S%YNE	9.7e-15	14	14	2.1e-08	1	0.28	1	0.001	7.4e-05	global-S%YNE	CASSFYNEQFF	TCRBV05-04	TCRBJ02-01	NA	03/0915:T1D7_Tscm	1	-	-	-	-	-	-	-	-	-	-	-
6	S%YNE	9.7e-15	14	14	2.1e-08	1	0.28	1	0.001	7.4e-05	global-S%YNE	CASSFYNEQFF	TCRBV07-09	TCRBJ02-01	NA	03/0915:T1D7_Tscm	1	-	-	-	-	-	-	-	-	-	-	-
6	S%YNE	9.7e-15	14	14	2.1e-08	1	0.28	1	0.001	7.4e-05	global-S%YNE	CASSFYNEQFF	TCRBV05-06	TCRBJ02-01	NA	03/0915:T1D7_Tscm	1	-	-	-	-	-	-	-	-	-	-	-
6	S%YNE	9.7e-15	14	14	2.1e-08	1	0.28	1	0.001	7.4e-05	global-S%YNE	CASSFYNEQFF	TCRBV28-01	TCRBJ02-01	NA	03/0915:T1D7_Tscm	1	-	-	-	-	-	-	-	-	-	-	-
6	S%YNE	9.7e-15	14	14	2.1e-08	1	0.28	1	0.001	7.4e-05	global-S%YNE	CASSYYNEQFF	TCRBV07-02	TCRBJ02-01	NA	03/0902:HD2_Tscm	1	-	-	-	-	-	-	-	-	-	-	-
6	S%YNE	9.7e-15	14	14	2.1e-08	1	0.28	1	0.001	7.4e-05	global-S%YNE	CASSYYNEQFF	TCRBV02-01	TCRBJ02-01	NA	03/0902:HD2_Tscm	1	-	-	-	-	-	-	-	-	-	-	-
6	S%YNE	9.7e-15	14	14	2.1e-08	1	0.28	1	0.001	7.4e-05	global-S%YNE	CASSYYNEQFF	TCRBV11-02	TCRBJ02-01	NA	03/0902:HD2_Tscm	1	-	-	-	-	-	-	-	-	-	-	-
6	S%YNE	9.7e-15	14	14	2.1e-08	1	0.28	1	0.001	7.4e-05	global-S%YNE	CASSYYNEQFF	TCRBV06-01	TCRBJ02-01	NA	03/0906:HD6_Tscm	1	-	-	-	-	-	-	-	-	-	-	-
6	S%YNE	9.7e-15	14	14	2.1e-08	1	0.28	1	0.001	7.4e-05	global-S%YNE	CASSYYNEQFF	TCRBV05-01	TCRBJ02-01	NA	03/0906:HD6_Tscm	1	-	-	-	-	-	-	-	-	-	-	-
6	S%YNE	9.7e-15	14	14	2.1e-08	1	0.28	1	0.001	7.4e-05	global-S%YNE	CASSYYNEQFF	TCRBV06-06	TCRBJ02-01	NA	03/0906:HD6_Tscm	1	-	-	-	-	-	-	-	-	-	-	-
6	S%YNE	9.7e-15	14	14	2.1e-08	1	0.28	1	0.001	7.4e-05	global-S%YNE	CASSYYNEQFF	TCRBV12-03	TCRBJ02-01	NA	03/0906:HD6_Tscm	1	-	-	-	-	-	-	-	-	-	-	-
6	S%YNE	9.7e-15	14	14	2.1e-08	1	0.28	1	0.001	7.4e-05	global-S%YNE	CASSYYNEQFF	TCRBV05-06	TCRBJ02-01	NA	03/0906:HD6_Tscm	1	-	-	-	-	-	-	-	-	-	-	-
6	S%YNE	9.7e-15	14	14	2.1e-08	1	0.28	1	0.001	7.4e-05	global-S%YNE	CASSYYNEQFF	TCRBV06-05	TCRBJ02-01	NA	03/0906:HD6_Tscm	1	-	-	-	-	-	-	-	-	-	-	-
6	S%YNE	9.7e-15	14	14	2.1e-08	1	0.28	1	0.001	7.4e-05	global-S%YNE	CASSYYNEQFF	TCRBV06-02	TCRBJ02-01	NA	03/0906:HD6_Tscm	1	-	-	-	-	-	-	-	-	-	-	-
6	S%YNE	9.7e-15	14	14	2.1e-08	1	0.28	1	0.001	7.4e-05	global-S%YNE	CASSYYNEQFF	TCRBV28-01	TCRBJ02-01	NA	03/0907:HD7_Tscm	1	-	-	-	-	-	-	-	-	-	-	-
6	S%YNE	9.7e-15	14	14	2.1e-08	1	0.28	1	0.001	7.4e-05	global-S%YNE	CASSYYNEQFF	TCRBV07-02	TCRBJ02-01	NA	03/0907:HD7_Tscm	1	-	-	-	-	-	-	-	-	-	-	-
6	S%YNE	9.7e-15	14	14	2.1e-08	1	0.28	1	0.001	7.4e-05	global-S%YNE	CASSYYNEQFF	TCRBV05-06	TCRBJ02-01	NA	03/0907:HD7_Tscm	1	-	-	-	-	-	-	-	-	-	-	-
6	S%YNE	9.7e-15	14	14	2.1e-08	1	0.28	1	0.001	7.4e-05	global-S%YNE	CASSYYNEQFF	TCRBV06-02	TCRBJ02-01	NA	03/0907:HD7_Tscm	1	-	-	-	-	-	-	-	-	-	-	-
6	S%YNE	9.7e-15	14	14	2.1e-08	1	0.28	1	0.001	7.4e-05	global-S%YNE	CASSYYNEQFF	TCRBV07-09	TCRBJ02-01	NA	03/0907:HD7_Tscm	1	-	-	-	-	-	-	-	-	-	-	-
6	S%YNE	9.7e-15	14	14	2.1e-08	1	0.28	1	0.001	7.4e-05	global-S%YNE	CASSYYNEQFF	TCRBV12-03	TCRBJ02-01	NA	03/0915:T1D7_Tscm	1	-	-	-	-	-	-	-	-	-	-	-
6	S%YNE	9.7e-15	14	14	2.1e-08	1	0.28	1	0.001	7.4e-05	global-S%YNE	CASSYYNEQFF	TCRBV19-01	TCRBJ02-01	NA	03/0915:T1D7_Tscm	1	-	-	-	-	-	-	-	-	-	-	-
6	S%YNE	9.7e-15	14	14	2.1e-08	1	0.28	1	0.001	7.4e-05	global-S%YNE	CASSYYNEQFF	TCRBV07-02	TCRBJ02-01	NA	03/0915:T1D7_Tscm	1	-	-	-	-	-	-	-	-	-	-	-
6	S%YNE	9.7e-15	14	14	2.1e-08	1	0.28	1	0.001	7.4e-05	global-S%YNE	CATSDYNEQFF	TCRBV24-01	TCRBJ02-01	NA	03/0913:T1D5_Tscm	1	-	-	-	-	-	-	-	-	-	-	-
6	S%YNE	9.7e-15	14	14	2.1e-08	1	0.28	1	0.001	7.4e-05	global-S%YNE	CASSSYNEQFF	TCRBV06-02	TCRBJ02-01	NA	03/0902:HD2_Tscm	1	-	-	-	-	-	-	-	-	-	-	-
6	S%YNE	9.7e-15	14	14	2.1e-08	1	0.28	1	0.001	7.4e-05	global-S%YNE	CASSSYNEQFF	TCRBV05-01	TCRBJ02-01	NA	03/0902:HD2_Tscm	1	-	-	-	-	-	-	-	-	-	-	-
6	S%YNE	9.7e-15	14	14	2.1e-08	1	0.28	1	0.001	7.4e-05	global-S%YNE	CASSSYNEQFF	TCRBV28-01	TCRBJ02-01	NA	03/0902:HD2_Tscm	1	-	-	-	-	-	-	-	-	-	-	-
6	S%YNE	9.7e-15	14	14	2.1e-08	1	0.28	1	0.001	7.4e-05	global-S%YNE	CASSSYNEQFF	TCRBV12-03	TCRBJ02-01	NA	03/0902:HD2_Tscm	1	-	-	-	-	-	-	-	-	-	-	-
6	S%YNE	9.7e-15	14	14	2.1e-08	1	0.28	1	0.001	7.4e-05	global-S%YNE	CASSSYNEQFF	TCRBV07-02	TCRBJ02-01	NA	03/0902:HD2_Tscm	1	-	-	-	-	-	-	-	-	-	-	-
6	S%YNE	9.7e-15	14	14	2.1e-08	1	0.28	1	0.001	7.4e-05	global-S%YNE	CASSSYNEQFF	TCRBV07-02	TCRBJ02-01	NA	03/0903:HD3_Tscm	1	-	-	-	-	-	-	-	-	-	-	-
6	S%YNE	9.7e-15	14	14	2.1e-08	1	0.28	1	0.001	7.4e-05	global-S%YNE	CASSSYNEQFF	TCRBV12-03	TCRBJ02-01	NA	03/0903:HD3_Tscm	1	-	-	-	-	-	-	-	-	-	-	-
6	S%YNE	9.7e-15	14	14	2.1e-08	1	0.28	1	0.001	7.4e-05	global-S%YNE	CASSSYNEQFF	TCRBV28-01	TCRBJ02-01	NA	03/0903:HD3_Tscm	1	-	-	-	-	-	-	-	-	-	-	-
6	S%YNE	9.7e-15	14	14	2.1e-08	1	0.28	1	0.001	7.4e-05	global-S%YNE	CASSSYNEQFF	TCRBV06-01	TCRBJ02-01	NA	03/0906:HD6_Tscm	1	-	-	-	-	-	-	-	-	-	-	-
6	S%YNE	9.7e-15	14	14	2.1e-08	1	0.28	1	0.001	7.4e-05	global-S%YNE	CASSSYNEQFF	TCRBV04-03	TCRBJ02-01	NA	03/0906:HD6_Tscm	1	-	-	-	-	-	-	-	-	-	-	-
6	S%YNE	9.7e-15	14	14	2.1e-08	1	0.28	1	0.001	7.4e-05	global-S%YNE	CASSSYNEQFF	TCRBV05-06	TCRBJ02-01	NA	03/0906:HD6_Tscm	1	-	-	-	-	-	-	-	-	-	-	-
6	S%YNE	9.7e-15	14	14	2.1e-08	1	0.28	1	0.001	7.4e-05	global-S%YNE	CASSSYNEQFF	TCRBV07-09	TCRBJ02-01	NA	03/0906:HD6_Tscm	1	-	-	-	-	-	-	-	-	-	-	-
6	S%YNE	9.7e-15	14	14	2.1e-08	1	0.28	1	0.001	7.4e-05	global-S%YNE	CASSSYNEQFF	TCRBV12-03	TCRBJ02-01	NA	03/0906:HD6_Tscm	1	-	-	-	-	-	-	-	-	-	-	-
6	S%YNE	9.7e-15	14	14	2.1e-08	1	0.28	1	0.001	7.4e-05	global-S%YNE	CASSSYNEQFF	TCRBV07-02	TCRBJ02-01	NA	03/0906:HD6_Tscm	1	-	-	-	-	-	-	-	-	-	-	-
6	S%YNE	9.7e-15	14	14	2.1e-08	1	0.28	1	0.001	7.4e-05	global-S%YNE	CASSSYNEQFF	TCRBV11-03	TCRBJ02-01	NA	03/0907:HD7_Tscm	1	-	-	-	-	-	-	-	-	-	-	-
6	S%YNE	9.7e-15	14	14	2.1e-08	1	0.28	1	0.001	7.4e-05	global-S%YNE	CASSSYNEQFF	TCRBV05-01	TCRBJ02-01	NA	03/0907:HD7_Tscm	1	-	-	-	-	-	-	-	-	-	-	-
6	S%YNE	9.7e-15	14	14	2.1e-08	1	0.28	1	0.001	7.4e-05	global-S%YNE	CASSSYNEQFF	TCRBV02-01	TCRBJ02-01	NA	03/0907:HD7_Tscm	1	-	-	-	-	-	-	-	-	-	-	-
6	S%YNE	9.7e-15	14	14	2.1e-08	1	0.28	1	0.001	7.4e-05	global-S%YNE	CASSSYNEQFF	TCRBV07-08	TCRBJ02-01	NA	03/0907:HD7_Tscm	1	-	-	-	-	-	-	-	-	-	-	-
6	S%YNE	9.7e-15	14	14	2.1e-08	1	0.28	1	0.001	7.4e-05	global-S%YNE	CASSSYNEQFF	TCRBV07-02	TCRBJ02-01	NA	03/0907:HD7_Tscm	1	-	-	-	-	-	-	-	-	-	-	-
6	S%YNE	9.7e-15	14	14	2.1e-08	1	0.28	1	0.001	7.4e-05	global-S%YNE	CASSSYNEQFF	TCRBV06-02	TCRBJ02-01	NA	03/0907:HD7_Tscm	1	-	-	-	-	-	-	-	-	-	-	-
6	S%YNE	9.7e-15	14	14	2.1e-08	1	0.28	1	0.001	7.4e-05	global-S%YNE	CASSSYNEQFF	TCRBV02-01	TCRBJ02-01	NA	03/0909:T1D1_Tscm	1	-	-	-	-	-	-	-	-	-	-	-
6	S%YNE	9.7e-15	14	14	2.1e-08	1	0.28	1	0.001	7.4e-05	global-S%YNE	CASSSYNEQFF	TCRBV12-03	TCRBJ02-01	NA	03/0909:T1D1_Tscm	1	-	-	-	-	-	-	-	-	-	-	-
6	S%YNE	9.7e-15	14	14	2.1e-08	1	0.28	1	0.001	7.4e-05	global-S%YNE	CASSSYNEQFF	TCRBV19-01	TCRBJ02-01	NA	03/0909:T1D1_Tscm	1	-	-	-	-	-	-	-	-	-	-	-
6	S%YNE	9.7e-15	14	14	2.1e-08	1	0.28	1	0.001	7.4e-05	global-S%YNE	CASSSYNEQFF	TCRBV12-03	TCRBJ02-01	NA	03/0914:T1D6_Tscm	1	-	-	-	-	-	-	-	-	-	-	-
6	S%YNE	9.7e-15	14	14	2.1e-08	1	0.28	1	0.001	7.4e-05	global-S%YNE	CASSSYNEQFF	TCRBV06-05	TCRBJ02-01	NA	03/0915:T1D7_Tscm	1	-	-	-	-	-	-	-	-	-	-	-
6	S%YNE	9.7e-15	14	14	2.1e-08	1	0.28	1	0.001	7.4e-05	global-S%YNE	CASSSYNEQFF	TCRBV12-03	TCRBJ02-01	NA	03/0915:T1D7_Tscm	1	-	-	-	-	-	-	-	-	-	-	-
6	S%YNE	9.7e-15	14	14	2.1e-08	1	0.28	1	0.001	7.4e-05	global-S%YNE	CASSSYNEQFF	TCRBV09-01	TCRBJ02-01	NA	03/0915:T1D7_Tscm	1	-	-	-	-	-	-	-	-	-	-	-
6	S%YNE	9.7e-15	14	14	2.1e-08	1	0.28	1	0.001	7.4e-05	global-S%YNE	CASSSYNEQFF	TCRBV06-02	TCRBJ02-01	NA	03/0915:T1D7_Tscm	1	-	-	-	-	-	-	-	-	-	-	-
6	S%YNE	9.7e-15	14	14	2.1e-08	1	0.28	1	0.001	7.4e-05	global-S%YNE	CASSSYNEQFF	TCRBV05-06	TCRBJ02-01	NA	03/0915:T1D7_Tscm	1	-	-	-	-	-	-	-	-	-	-	-
6	S%YNE	9.7e-15	14	14	2.1e-08	1	0.28	1	0.001	7.4e-05	global-S%YNE	CASSSYNEQFF	TCRBV07-09	TCRBJ02-01	NA	03/0915:T1D7_Tscm	1	-	-	-	-	-	-	-	-	-	-	-
6	S%YNE	9.7e-15	14	14	2.1e-08	1	0.28	1	0.001	7.4e-05	global-S%YNE	CASSSYNEQFF	TCRBV07-02	TCRBJ02-01	NA	03/0915:T1D7_Tscm	1	-	-	-	-	-	-	-	-	-	-	-
6	S%YNE	9.7e-15	14	14	2.1e-08	1	0.28	1	0.001	7.4e-05	global-S%YNE	CASSGYNEQFF	TCRBV02-01	TCRBJ02-01	NA	03/0902:HD2_Tscm	1	-	-	-	-	-	-	-	-	-	-	-
6	S%YNE	9.7e-15	14	14	2.1e-08	1	0.28	1	0.001	7.4e-05	global-S%YNE	CASSGYNEQFF	TCRBV19-01	TCRBJ02-01	NA	03/0902:HD2_Tscm	1	-	-	-	-	-	-	-	-	-	-	-
6	S%YNE	9.7e-15	14	14	2.1e-08	1	0.28	1	0.001	7.4e-05	global-S%YNE	CASSGYNEQFF	TCRBV05-01	TCRBJ02-01	NA	03/0902:HD2_Tscm	1	-	-	-	-	-	-	-	-	-	-	-
6	S%YNE	9.7e-15	14	14	2.1e-08	1	0.28	1	0.001	7.4e-05	global-S%YNE	CASSGYNEQFF	TCRBV30-01	TCRBJ02-01	NA	03/0902:HD2_Tscm	1	-	-	-	-	-	-	-	-	-	-	-
6	S%YNE	9.7e-15	14	14	2.1e-08	1	0.28	1	0.001	7.4e-05	global-S%YNE	CASSGYNEQFF	TCRBV05-01	TCRBJ02-01	NA	03/0906:HD6_Tscm	1	-	-	-	-	-	-	-	-	-	-	-
6	S%YNE	9.7e-15	14	14	2.1e-08	1	0.28	1	0.001	7.4e-05	global-S%YNE	CASSGYNEQFF	TCRBV02-01	TCRBJ02-01	NA	03/0906:HD6_Tscm	1	-	-	-	-	-	-	-	-	-	-	-
6	S%YNE	9.7e-15	14	14	2.1e-08	1	0.28	1	0.001	7.4e-05	global-S%YNE	CASSGYNEQFF	TCRBV09-01	TCRBJ02-01	NA	03/0906:HD6_Tscm	1	-	-	-	-	-	-	-	-	-	-	-
6	S%YNE	9.7e-15	14	14	2.1e-08	1	0.28	1	0.001	7.4e-05	global-S%YNE	CASSGYNEQFF	TCRBV25-01	TCRBJ02-01	NA	03/0906:HD6_Tscm	1	-	-	-	-	-	-	-	-	-	-	-
6	S%YNE	9.7e-15	14	14	2.1e-08	1	0.28	1	0.001	7.4e-05	global-S%YNE	CASSGYNEQFF	TCRBV05-04	TCRBJ02-01	NA	03/0906:HD6_Tscm	1	-	-	-	-	-	-	-	-	-	-	-
6	S%YNE	9.7e-15	14	14	2.1e-08	1	0.28	1	0.001	7.4e-05	global-S%YNE	CASSGYNEQFF	TCRBV06-01	TCRBJ02-01	NA	03/0915:T1D7_Tscm	1	-	-	-	-	-	-	-	-	-	-	-
6	S%YNE	9.7e-15	14	14	2.1e-08	1	0.28	1	0.001	7.4e-05	global-S%YNE	CASSGYNEQFF	TCRBV05-01	TCRBJ02-01	NA	03/0915:T1D7_Tscm	1	-	-	-	-	-	-	-	-	-	-	-
6	S%YNE	9.7e-15	14	14	2.1e-08	1	0.28	1	0.001	7.4e-05	global-S%YNE	CASSGYNEQFF	TCRBV18-01	TCRBJ02-01	NA	03/0915:T1D7_Tscm	1	-	-	-	-	-	-	-	-	-	-	-
7	S%GET	1.3e-14	16	16	4.4e-08	1	0.51	1	0.001	8.6e-05	global-S%GET	CASSGGETQYF	TCRBV10-02	TCRBJ02-05	NA	03/0910:T1D2_Tscm	1	-	-	-	-	-	-	-	-	-	-	-
7	S%GET	1.3e-14	16	16	4.4e-08	1	0.51	1	0.001	8.6e-05	global-S%GET	CASSGGETQYF	TCRBV05-01	TCRBJ02-05	NA	03/0910:T1D2_Tscm	1	-	-	-	-	-	-	-	-	-	-	-
7	S%GET	1.3e-14	16	16	4.4e-08	1	0.51	1	0.001	8.6e-05	global-S%GET	CASSGGETQYF	TCRBV06-06	TCRBJ02-05	NA	03/0910:T1D2_Tscm	1	-	-	-	-	-	-	-	-	-	-	-
7	S%GET	1.3e-14	16	16	4.4e-08	1	0.51	1	0.001	8.6e-05	global-S%GET	CAISDGETQYF	TCRBV10-03	TCRBJ02-05	NA	03/0904:HD4_Tscm	1	-	-	-	-	-	-	-	-	-	-	-
7	S%GET	1.3e-14	16	16	4.4e-08	1	0.51	1	0.001	8.6e-05	global-S%GET	CASSSGETQYF	TCRBV11-03	TCRBJ02-05	NA	03/0902:HD2_Tscm	1	-	-	-	-	-	-	-	-	-	-	-
7	S%GET	1.3e-14	16	16	4.4e-08	1	0.51	1	0.001	8.6e-05	global-S%GET	CASSSGETQYF	TCRBV07-02	TCRBJ02-05	NA	03/0902:HD2_Tscm	1	-	-	-	-	-	-	-	-	-	-	-
7	S%GET	1.3e-14	16	16	4.4e-08	1	0.51	1	0.001	8.6e-05	global-S%GET	CASSSGETQYF	TCRBV02-01	TCRBJ02-05	NA	03/0902:HD2_Tscm	1	-	-	-	-	-	-	-	-	-	-	-
7	S%GET	1.3e-14	16	16	4.4e-08	1	0.51	1	0.001	8.6e-05	global-S%GET	CASSSGETQYF	TCRBV09-01	TCRBJ02-05	NA	03/0902:HD2_Tscm	1	-	-	-	-	-	-	-	-	-	-	-
7	S%GET	1.3e-14	16	16	4.4e-08	1	0.51	1	0.001	8.6e-05	global-S%GET	CASSSGETQYF	TCRBV07-03	TCRBJ02-05	NA	03/0902:HD2_Tscm	1	-	-	-	-	-	-	-	-	-	-	-
7	S%GET	1.3e-14	16	16	4.4e-08	1	0.51	1	0.001	8.6e-05	global-S%GET	CASSSGETQYF	TCRBV12-03	TCRBJ02-05	NA	03/0902:HD2_Tscm	1	-	-	-	-	-	-	-	-	-	-	-
7	S%GET	1.3e-14	16	16	4.4e-08	1	0.51	1	0.001	8.6e-05	global-S%GET	CASSSGETQYF	TCRBV06-01	TCRBJ02-05	NA	03/0903:HD3_Tscm	1	-	-	-	-	-	-	-	-	-	-	-
7	S%GET	1.3e-14	16	16	4.4e-08	1	0.51	1	0.001	8.6e-05	global-S%GET	CASSSGETQYF	TCRBV07-03	TCRBJ02-05	NA	03/0903:HD3_Tscm	1	-	-	-	-	-	-	-	-	-	-	-
7	S%GET	1.3e-14	16	16	4.4e-08	1	0.51	1	0.001	8.6e-05	global-S%GET	CASSSGETQYF	TCRBV18-01	TCRBJ02-05	NA	03/0903:HD3_Tscm	1	-	-	-	-	-	-	-	-	-	-	-
7	S%GET	1.3e-14	16	16	4.4e-08	1	0.51	1	0.001	8.6e-05	global-S%GET	CASSSGETQYF	TCRBV06-06	TCRBJ02-05	NA	03/0903:HD3_Tscm	1	-	-	-	-	-	-	-	-	-	-	-
7	S%GET	1.3e-14	16	16	4.4e-08	1	0.51	1	0.001	8.6e-05	global-S%GET	CASSSGETQYF	TCRBV06-05	TCRBJ02-05	NA	03/0907:HD7_Tscm	1	-	-	-	-	-	-	-	-	-	-	-
7	S%GET	1.3e-14	16	16	4.4e-08	1	0.51	1	0.001	8.6e-05	global-S%GET	CASSSGETQYF	TCRBV06-02	TCRBJ02-05	NA	03/0907:HD7_Tscm	1	-	-	-	-	-	-	-	-	-	-	-
7	S%GET	1.3e-14	16	16	4.4e-08	1	0.51	1	0.001	8.6e-05	global-S%GET	CASSSGETQYF	TCRBV19-01	TCRBJ02-05	NA	03/0907:HD7_Tscm	1	-	-	-	-	-	-	-	-	-	-	-
7	S%GET	1.3e-14	16	16	4.4e-08	1	0.51	1	0.001	8.6e-05	global-S%GET	CASSSGETQYF	TCRBV12-03	TCRBJ02-05	NA	03/0907:HD7_Tscm	1	-	-	-	-	-	-	-	-	-	-	-
7	S%GET	1.3e-14	16	16	4.4e-08	1	0.51	1	0.001	8.6e-05	global-S%GET	CASSSGETQYF	TCRBV07-09	TCRBJ02-05	NA	03/0909:T1D1_Tscm	1	-	-	-	-	-	-	-	-	-	-	-
7	S%GET	1.3e-14	16	16	4.4e-08	1	0.51	1	0.001	8.6e-05	global-S%GET	CASSSGETQYF	TCRBV06-06	TCRBJ02-05	NA	03/0909:T1D1_Tscm	1	-	-	-	-	-	-	-	-	-	-	-
7	S%GET	1.3e-14	16	16	4.4e-08	1	0.51	1	0.001	8.6e-05	global-S%GET	CASSSGETQYF	TCRBV06-05	TCRBJ02-05	NA	03/0909:T1D1_Tscm	1	-	-	-	-	-	-	-	-	-	-	-
7	S%GET	1.3e-14	16	16	4.4e-08	1	0.51	1	0.001	8.6e-05	global-S%GET	CASSEGETQYF	TCRBV07-02	TCRBJ02-05	NA	03/0906:HD6_Tscm	1	-	-	-	-	-	-	-	-	-	-	-
7	S%GET	1.3e-14	16	16	4.4e-08	1	0.51	1	0.001	8.6e-05	global-S%GET	CASSEGETQYF	TCRBV25-01	TCRBJ02-05	NA	03/0906:HD6_Tscm	1	-	-	-	-	-	-	-	-	-	-	-
7	S%GET	1.3e-14	16	16	4.4e-08	1	0.51	1	0.001	8.6e-05	global-S%GET	CASSEGETQYF	TCRBV03-01	TCRBJ02-05	NA	03/0908:HD8_Tscm	1	-	-	-	-	-	-	-	-	-	-	-
7	S%GET	1.3e-14	16	16	4.4e-08	1	0.51	1	0.001	8.6e-05	global-S%GET	CASSQGETQYF	TCRBV04-01	TCRBJ02-05	NA	03/0902:HD2_Tscm	1	-	-	-	-	-	-	-	-	-	-	-
7	S%GET	1.3e-14	16	16	4.4e-08	1	0.51	1	0.001	8.6e-05	global-S%GET	CASSQGETQYF	TCRBV12-03	TCRBJ02-05	NA	03/0902:HD2_Tscm	1	-	-	-	-	-	-	-	-	-	-	-
7	S%GET	1.3e-14	16	16	4.4e-08	1	0.51	1	0.001	8.6e-05	global-S%GET	CASSQGETQYF	TCRBV04-03	TCRBJ02-05	NA	03/0902:HD2_Tscm	1	-	-	-	-	-	-	-	-	-	-	-
7	S%GET	1.3e-14	16	16	4.4e-08	1	0.51	1	0.001	8.6e-05	global-S%GET	CASSQGETQYF	TCRBV06-02	TCRBJ02-05	NA	03/0905:HD5_Tscm	1	-	-	-	-	-	-	-	-	-	-	-
7	S%GET	1.3e-14	16	16	4.4e-08	1	0.51	1	0.001	8.6e-05	global-S%GET	CASSQGETQYF	TCRBV06-01	TCRBJ02-05	NA	03/0905:HD5_Tscm	1	-	-	-	-	-	-	-	-	-	-	-
7	S%GET	1.3e-14	16	16	4.4e-08	1	0.51	1	0.001	8.6e-05	global-S%GET	CASSQGETQYF	TCRBV06-05	TCRBJ02-05	NA	03/0905:HD5_Tscm	1	-	-	-	-	-	-	-	-	-	-	-
7	S%GET	1.3e-14	16	16	4.4e-08	1	0.51	1	0.001	8.6e-05	global-S%GET	CASSQGETQYF	TCRBV07-09	TCRBJ02-05	NA	03/0906:HD6_Tscm	1	-	-	-	-	-	-	-	-	-	-	-
7	S%GET	1.3e-14	16	16	4.4e-08	1	0.51	1	0.001	8.6e-05	global-S%GET	CASSQGETQYF	TCRBV06-01	TCRBJ02-05	NA	03/0906:HD6_Tscm	1	-	-	-	-	-	-	-	-	-	-	-
7	S%GET	1.3e-14	16	16	4.4e-08	1	0.51	1	0.001	8.6e-05	global-S%GET	CASSQGETQYF	TCRBV06-02	TCRBJ02-05	NA	03/0906:HD6_Tscm	1	-	-	-	-	-	-	-	-	-	-	-
7	S%GET	1.3e-14	16	16	4.4e-08	1	0.51	1	0.001	8.6e-05	global-S%GET	CASSQGETQYF	TCRBV06-05	TCRBJ02-05	NA	03/0906:HD6_Tscm	1	-	-	-	-	-	-	-	-	-	-	-
7	S%GET	1.3e-14	16	16	4.4e-08	1	0.51	1	0.001	8.6e-05	global-S%GET	CASSQGETQYF	TCRBV04-01	TCRBJ02-05	NA	03/0906:HD6_Tscm	1	-	-	-	-	-	-	-	-	-	-	-
7	S%GET	1.3e-14	16	16	4.4e-08	1	0.51	1	0.001	8.6e-05	global-S%GET	CASSQGETQYF	TCRBV07-06	TCRBJ02-05	NA	03/0906:HD6_Tscm	1	-	-	-	-	-	-	-	-	-	-	-
7	S%GET	1.3e-14	16	16	4.4e-08	1	0.51	1	0.001	8.6e-05	global-S%GET	CASSQGETQYF	TCRBV03-01	TCRBJ02-05	NA	03/0906:HD6_Tscm	1	-	-	-	-	-	-	-	-	-	-	-
7	S%GET	1.3e-14	16	16	4.4e-08	1	0.51	1	0.001	8.6e-05	global-S%GET	CASSQGETQYF	TCRBV07-03	TCRBJ02-05	NA	03/0906:HD6_Tscm	1	-	-	-	-	-	-	-	-	-	-	-
7	S%GET	1.3e-14	16	16	4.4e-08	1	0.51	1	0.001	8.6e-05	global-S%GET	CASSVGETQYF	TCRBV09-01	TCRBJ02-05	NA	03/0901:HD1_Tscm	1	-	-	-	-	-	-	-	-	-	-	-
7	S%GET	1.3e-14	16	16	4.4e-08	1	0.51	1	0.001	8.6e-05	global-S%GET	CASSVGETQYF	TCRBV18-01	TCRBJ02-05	NA	03/0907:HD7_Tscm	1	-	-	-	-	-	-	-	-	-	-	-
7	S%GET	1.3e-14	16	16	4.4e-08	1	0.51	1	0.001	8.6e-05	global-S%GET	CASSVGETQYF	TCRBV14-01	TCRBJ02-05	NA	03/0907:HD7_Tscm	1	-	-	-	-	-	-	-	-	-	-	-
7	S%GET	1.3e-14	16	16	4.4e-08	1	0.51	1	0.001	8.6e-05	global-S%GET	CASSVGETQYF	TCRBV09-01	TCRBJ02-05	NA	03/0907:HD7_Tscm	1	-	-	-	-	-	-	-	-	-	-	-
7	S%GET	1.3e-14	16	16	4.4e-08	1	0.51	1	0.001	8.6e-05	global-S%GET	CASSFGETQYF	TCRBV05-06	TCRBJ02-05	NA	03/0906:HD6_Tscm	1	-	-	-	-	-	-	-	-	-	-	-
7	S%GET	1.3e-14	16	16	4.4e-08	1	0.51	1	0.001	8.6e-05	global-S%GET	CASSFGETQYF	TCRBV07-08	TCRBJ02-05	NA	03/0906:HD6_Tscm	1	-	-	-	-	-	-	-	-	-	-	-
7	S%GET	1.3e-14	16	16	4.4e-08	1	0.51	1	0.001	8.6e-05	global-S%GET	CASSFGETQYF	TCRBV05-01	TCRBJ02-05	NA	03/0906:HD6_Tscm	1	-	-	-	-	-	-	-	-	-	-	-
7	S%GET	1.3e-14	16	16	4.4e-08	1	0.51	1	0.001	8.6e-05	global-S%GET	CASSFGETQYF	TCRBV12-03	TCRBJ02-05	NA	03/0906:HD6_Tscm	1	-	-	-	-	-	-	-	-	-	-	-
7	S%GET	1.3e-14	16	16	4.4e-08	1	0.51	1	0.001	8.6e-05	global-S%GET	CASSFGETQYF	TCRBV13-01	TCRBJ02-05	NA	03/0906:HD6_Tscm	1	-	-	-	-	-	-	-	-	-	-	-
7	S%GET	1.3e-14	16	16	4.4e-08	1	0.51	1	0.001	8.6e-05	global-S%GET	CASSFGETQYF	TCRBV07-06	TCRBJ02-05	NA	03/0907:HD7_Tscm	1	-	-	-	-	-	-	-	-	-	-	-
7	S%GET	1.3e-14	16	16	4.4e-08	1	0.51	1	0.001	8.6e-05	global-S%GET	CASSFGETQYF	TCRBV12-03	TCRBJ02-05	NA	03/0907:HD7_Tscm	1	-	-	-	-	-	-	-	-	-	-	-
7	S%GET	1.3e-14	16	16	4.4e-08	1	0.51	1	0.001	8.6e-05	global-S%GET	CASSFGETQYF	TCRBV07-09	TCRBJ02-05	NA	03/0907:HD7_Tscm	1	-	-	-	-	-	-	-	-	-	-	-
7	S%GET	1.3e-14	16	16	4.4e-08	1	0.51	1	0.001	8.6e-05	global-S%GET	CASSFGETQYF	TCRBV28-01	TCRBJ02-05	NA	03/0907:HD7_Tscm	1	-	-	-	-	-	-	-	-	-	-	-
7	S%GET	1.3e-14	16	16	4.4e-08	1	0.51	1	0.001	8.6e-05	global-S%GET	CASSHGETQYF	TCRBV06-05	TCRBJ02-05	NA	03/0903:HD3_Tscm	1	-	-	-	-	-	-	-	-	-	-	-
7	S%GET	1.3e-14	16	16	4.4e-08	1	0.51	1	0.001	8.6e-05	global-S%GET	CASSHGETQYF	TCRBV07-03	TCRBJ02-05	NA	03/0903:HD3_Tscm	1	-	-	-	-	-	-	-	-	-	-	-
7	S%GET	1.3e-14	16	16	4.4e-08	1	0.51	1	0.001	8.6e-05	global-S%GET	CASSHGETQYF	TCRBV03-01	TCRBJ02-05	NA	03/0903:HD3_Tscm	1	-	-	-	-	-	-	-	-	-	-	-
7	S%GET	1.3e-14	16	16	4.4e-08	1	0.51	1	0.001	8.6e-05	global-S%GET	CASSHGETQYF	TCRBV07-09	TCRBJ02-05	NA	03/0903:HD3_Tscm	1	-	-	-	-	-	-	-	-	-	-	-
7	S%GET	1.3e-14	16	16	4.4e-08	1	0.51	1	0.001	8.6e-05	global-S%GET	CASSHGETQYF	TCRBV06-02	TCRBJ02-05	NA	03/0903:HD3_Tscm	1	-	-	-	-	-	-	-	-	-	-	-
7	S%GET	1.3e-14	16	16	4.4e-08	1	0.51	1	0.001	8.6e-05	global-S%GET	CASSHGETQYF	TCRBV04-02	TCRBJ02-05	NA	03/0915:T1D7_Tscm	1	-	-	-	-	-	-	-	-	-	-	-
7	S%GET	1.3e-14	16	16	4.4e-08	1	0.51	1	0.001	8.6e-05	global-S%GET	CASSHGETQYF	TCRBV23-01	TCRBJ02-05	NA	03/0915:T1D7_Tscm	1	-	-	-	-	-	-	-	-	-	-	-
7	S%GET	1.3e-14	16	16	4.4e-08	1	0.51	1	0.001	8.6e-05	global-S%GET	CASSRGETQYF	TCRBV07-07	TCRBJ02-05	NA	03/0903:HD3_Tscm	1	-	-	-	-	-	-	-	-	-	-	-
7	S%GET	1.3e-14	16	16	4.4e-08	1	0.51	1	0.001	8.6e-05	global-S%GET	CASSRGETQYF	TCRBV09-01	TCRBJ02-05	NA	03/0903:HD3_Tscm	1	-	-	-	-	-	-	-	-	-	-	-
7	S%GET	1.3e-14	16	16	4.4e-08	1	0.51	1	0.001	8.6e-05	global-S%GET	CASSRGETQYF	TCRBV06-02	TCRBJ02-05	NA	03/0907:HD7_Tscm	1	-	-	-	-	-	-	-	-	-	-	-
7	S%GET	1.3e-14	16	16	4.4e-08	1	0.51	1	0.001	8.6e-05	global-S%GET	CASSRGETQYF	TCRBV18-01	TCRBJ02-05	NA	03/0907:HD7_Tscm	1	-	-	-	-	-	-	-	-	-	-	-
7	S%GET	1.3e-14	16	16	4.4e-08	1	0.51	1	0.001	8.6e-05	global-S%GET	CASSRGETQYF	TCRBV02-01	TCRBJ02-05	NA	03/0907:HD7_Tscm	1	-	-	-	-	-	-	-	-	-	-	-
7	S%GET	1.3e-14	16	16	4.4e-08	1	0.51	1	0.001	8.6e-05	global-S%GET	CASSYGETQYF	TCRBV06-02	TCRBJ02-05	NA	03/0903:HD3_Tscm	1	-	-	-	-	-	-	-	-	-	-	-
7	S%GET	1.3e-14	16	16	4.4e-08	1	0.51	1	0.001	8.6e-05	global-S%GET	CASSYGETQYF	TCRBV07-02	TCRBJ02-05	NA	03/0903:HD3_Tscm	1	-	-	-	-	-	-	-	-	-	-	-
7	S%GET	1.3e-14	16	16	4.4e-08	1	0.51	1	0.001	8.6e-05	global-S%GET	CASSYGETQYF	TCRBV06-06	TCRBJ02-05	NA	03/0912:T1D4_Tscm	1	-	-	-	-	-	-	-	-	-	-	-
7	S%GET	1.3e-14	16	16	4.4e-08	1	0.51	1	0.001	8.6e-05	global-S%GET	CASSYGETQYF	TCRBV06-05	TCRBJ02-05	NA	03/0912:T1D4_Tscm	1	-	-	-	-	-	-	-	-	-	-	-
7	S%GET	1.3e-14	16	16	4.4e-08	1	0.51	1	0.001	8.6e-05	global-S%GET	CAWSVGETQYF	TCRBV30-01	TCRBJ02-05	NA	03/0906:HD6_Tscm	1	-	-	-	-	-	-	-	-	-	-	-
7	S%GET	1.3e-14	16	16	4.4e-08	1	0.51	1	0.001	8.6e-05	global-S%GET	CAWSVGETQYF	TCRBV30-01	TCRBJ02-05	NA	03/0913:T1D5_Tscm	1	-	-	-	-	-	-	-	-	-	-	-
7	S%GET	1.3e-14	16	16	4.4e-08	1	0.51	1	0.001	8.6e-05	global-S%GET	CASSIGETQYF	TCRBV19-01	TCRBJ02-05	NA	03/0903:HD3_Tscm	1	-	-	-	-	-	-	-	-	-	-	-
7	S%GET	1.3e-14	16	16	4.4e-08	1	0.51	1	0.001	8.6e-05	global-S%GET	CASSIGETQYF	TCRBV05-06	TCRBJ02-05	NA	03/0903:HD3_Tscm	1	-	-	-	-	-	-	-	-	-	-	-
7	S%GET	1.3e-14	16	16	4.4e-08	1	0.51	1	0.001	8.6e-05	global-S%GET	CASSIGETQYF	TCRBV19-01	TCRBJ02-05	NA	03/0905:HD5_Tscm	1	-	-	-	-	-	-	-	-	-	-	-
7	S%GET	1.3e-14	16	16	4.4e-08	1	0.51	1	0.001	8.6e-05	global-S%GET	CASSIGETQYF	TCRBV07-02	TCRBJ02-05	NA	03/0907:HD7_Tscm	1	-	-	-	-	-	-	-	-	-	-	-
7	S%GET	1.3e-14	16	16	4.4e-08	1	0.51	1	0.001	8.6e-05	global-S%GET	CASSIGETQYF	TCRBV06-05	TCRBJ02-05	NA	03/0907:HD7_Tscm	1	-	-	-	-	-	-	-	-	-	-	-
7	S%GET	1.3e-14	16	16	4.4e-08	1	0.51	1	0.001	8.6e-05	global-S%GET	CASSIGETQYF	TCRBV07-09	TCRBJ02-05	NA	03/0907:HD7_Tscm	1	-	-	-	-	-	-	-	-	-	-	-
7	S%GET	1.3e-14	16	16	4.4e-08	1	0.51	1	0.001	8.6e-05	global-S%GET	CASSIGETQYF	TCRBV19-01	TCRBJ02-05	NA	03/0907:HD7_Tscm	1	-	-	-	-	-	-	-	-	-	-	-
7	S%GET	1.3e-14	16	16	4.4e-08	1	0.51	1	0.001	8.6e-05	global-S%GET	CASSTGETQYF	TCRBV03-01	TCRBJ02-05	NA	03/0910:T1D2_Tscm	1	-	-	-	-	-	-	-	-	-	-	-
7	S%GET	1.3e-14	16	16	4.4e-08	1	0.51	1	0.001	8.6e-05	global-S%GET	CASSTGETQYF	TCRBV07-02	TCRBJ02-05	NA	03/0913:T1D5_Tscm	1	-	-	-	-	-	-	-	-	-	-	-
7	S%GET	1.3e-14	16	16	4.4e-08	1	0.51	1	0.001	8.6e-05	global-S%GET	CAWSLGETQYF	TCRBV30-01	TCRBJ02-05	NA	03/0913:T1D5_Tscm	1	-	-	-	-	-	-	-	-	-	-	-
7	S%GET	1.3e-14	16	16	4.4e-08	1	0.51	1	0.001	8.6e-05	global-S%GET	CASSLGETQYF	TCRBV07-06	TCRBJ02-05	NA	03/0901:HD1_Tscm	1	-	-	-	-	-	-	-	-	-	-	-
7	S%GET	1.3e-14	16	16	4.4e-08	1	0.51	1	0.001	8.6e-05	global-S%GET	CASSLGETQYF	TCRBV07-08	TCRBJ02-05	NA	03/0901:HD1_Tscm	1	-	-	-	-	-	-	-	-	-	-	-
7	S%GET	1.3e-14	16	16	4.4e-08	1	0.51	1	0.001	8.6e-05	global-S%GET	CASSLGETQYF	TCRBV05-06	TCRBJ02-05	NA	03/0901:HD1_Tscm	1	-	-	-	-	-	-	-	-	-	-	-
7	S%GET	1.3e-14	16	16	4.4e-08	1	0.51	1	0.001	8.6e-05	global-S%GET	CASSLGETQYF	TCRBV12-03	TCRBJ02-05	NA	03/0901:HD1_Tscm	1	-	-	-	-	-	-	-	-	-	-	-
7	S%GET	1.3e-14	16	16	4.4e-08	1	0.51	1	0.001	8.6e-05	global-S%GET	CASSLGETQYF	TCRBV11-02	TCRBJ02-05	NA	03/0902:HD2_Tscm	1	-	-	-	-	-	-	-	-	-	-	-
7	S%GET	1.3e-14	16	16	4.4e-08	1	0.51	1	0.001	8.6e-05	global-S%GET	CASSLGETQYF	TCRBV05-01	TCRBJ02-05	NA	03/0902:HD2_Tscm	1	-	-	-	-	-	-	-	-	-	-	-
7	S%GET	1.3e-14	16	16	4.4e-08	1	0.51	1	0.001	8.6e-05	global-S%GET	CASSLGETQYF	TCRBV11-03	TCRBJ02-05	NA	03/0902:HD2_Tscm	1	-	-	-	-	-	-	-	-	-	-	-
7	S%GET	1.3e-14	16	16	4.4e-08	1	0.51	1	0.001	8.6e-05	global-S%GET	CASSLGETQYF	TCRBV06-02	TCRBJ02-05	NA	03/0902:HD2_Tscm	1	-	-	-	-	-	-	-	-	-	-	-
7	S%GET	1.3e-14	16	16	4.4e-08	1	0.51	1	0.001	8.6e-05	global-S%GET	CASSLGETQYF	TCRBV07-07	TCRBJ02-05	NA	03/0902:HD2_Tscm	1	-	-	-	-	-	-	-	-	-	-	-
7	S%GET	1.3e-14	16	16	4.4e-08	1	0.51	1	0.001	8.6e-05	global-S%GET	CASSLGETQYF	TCRBV12-03	TCRBJ02-05	NA	03/0902:HD2_Tscm	1	-	-	-	-	-	-	-	-	-	-	-
7	S%GET	1.3e-14	16	16	4.4e-08	1	0.51	1	0.001	8.6e-05	global-S%GET	CASSLGETQYF	TCRBV05-04	TCRBJ02-05	NA	03/0902:HD2_Tscm	1	-	-	-	-	-	-	-	-	-	-	-
7	S%GET	1.3e-14	16	16	4.4e-08	1	0.51	1	0.001	8.6e-05	global-S%GET	CASSLGETQYF	TCRBV07-02	TCRBJ02-05	NA	03/0902:HD2_Tscm	1	-	-	-	-	-	-	-	-	-	-	-
7	S%GET	1.3e-14	16	16	4.4e-08	1	0.51	1	0.001	8.6e-05	global-S%GET	CASSLGETQYF	TCRBV07-09	TCRBJ02-05	NA	03/0902:HD2_Tscm	1	-	-	-	-	-	-	-	-	-	-	-
7	S%GET	1.3e-14	16	16	4.4e-08	1	0.51	1	0.001	8.6e-05	global-S%GET	CASSLGETQYF	TCRBV11-02	TCRBJ02-05	NA	03/0903:HD3_Tscm	1	-	-	-	-	-	-	-	-	-	-	-
7	S%GET	1.3e-14	16	16	4.4e-08	1	0.51	1	0.001	8.6e-05	global-S%GET	CASSLGETQYF	TCRBV13-01	TCRBJ02-05	NA	03/0903:HD3_Tscm	1	-	-	-	-	-	-	-	-	-	-	-
7	S%GET	1.3e-14	16	16	4.4e-08	1	0.51	1	0.001	8.6e-05	global-S%GET	CASSLGETQYF	TCRBV07-06	TCRBJ02-05	NA	03/0903:HD3_Tscm	1	-	-	-	-	-	-	-	-	-	-	-
7	S%GET	1.3e-14	16	16	4.4e-08	1	0.51	1	0.001	8.6e-05	global-S%GET	CASSLGETQYF	TCRBV05-01	TCRBJ02-05	NA	03/0903:HD3_Tscm	1	-	-	-	-	-	-	-	-	-	-	-
7	S%GET	1.3e-14	16	16	4.4e-08	1	0.51	1	0.001	8.6e-05	global-S%GET	CASSLGETQYF	TCRBV07-09	TCRBJ02-05	NA	03/0903:HD3_Tscm	1	-	-	-	-	-	-	-	-	-	-	-
7	S%GET	1.3e-14	16	16	4.4e-08	1	0.51	1	0.001	8.6e-05	global-S%GET	CASSLGETQYF	TCRBV05-06	TCRBJ02-05	NA	03/0903:HD3_Tscm	1	-	-	-	-	-	-	-	-	-	-	-
7	S%GET	1.3e-14	16	16	4.4e-08	1	0.51	1	0.001	8.6e-05	global-S%GET	CASSLGETQYF	TCRBV05-05	TCRBJ02-05	NA	03/0904:HD4_Tscm	1	-	-	-	-	-	-	-	-	-	-	-
7	S%GET	1.3e-14	16	16	4.4e-08	1	0.51	1	0.001	8.6e-05	global-S%GET	CASSLGETQYF	TCRBV27-01	TCRBJ02-05	NA	03/0904:HD4_Tscm	1	-	-	-	-	-	-	-	-	-	-	-
7	S%GET	1.3e-14	16	16	4.4e-08	1	0.51	1	0.001	8.6e-05	global-S%GET	CASSLGETQYF	TCRBV28-01	TCRBJ02-05	NA	03/0904:HD4_Tscm	1	-	-	-	-	-	-	-	-	-	-	-
7	S%GET	1.3e-14	16	16	4.4e-08	1	0.51	1	0.001	8.6e-05	global-S%GET	CASSLGETQYF	TCRBV14-01	TCRBJ02-05	NA	03/0906:HD6_Tscm	1	-	-	-	-	-	-	-	-	-	-	-
7	S%GET	1.3e-14	16	16	4.4e-08	1	0.51	1	0.001	8.6e-05	global-S%GET	CASSLGETQYF	TCRBV19-01	TCRBJ02-05	NA	03/0906:HD6_Tscm	1	-	-	-	-	-	-	-	-	-	-	-
7	S%GET	1.3e-14	16	16	4.4e-08	1	0.51	1	0.001	8.6e-05	global-S%GET	CASSLGETQYF	TCRBV05-06	TCRBJ02-05	NA	03/0906:HD6_Tscm	1	-	-	-	-	-	-	-	-	-	-	-
7	S%GET	1.3e-14	16	16	4.4e-08	1	0.51	1	0.001	8.6e-05	global-S%GET	CASSLGETQYF	TCRBV07-06	TCRBJ02-05	NA	03/0906:HD6_Tscm	1	-	-	-	-	-	-	-	-	-	-	-
7	S%GET	1.3e-14	16	16	4.4e-08	1	0.51	1	0.001	8.6e-05	global-S%GET	CASSLGETQYF	TCRBV05-05	TCRBJ02-05	NA	03/0906:HD6_Tscm	1	-	-	-	-	-	-	-	-	-	-	-
7	S%GET	1.3e-14	16	16	4.4e-08	1	0.51	1	0.001	8.6e-05	global-S%GET	CASSLGETQYF	TCRBV28-01	TCRBJ02-05	NA	03/0906:HD6_Tscm	1	-	-	-	-	-	-	-	-	-	-	-
7	S%GET	1.3e-14	16	16	4.4e-08	1	0.51	1	0.001	8.6e-05	global-S%GET	CASSLGETQYF	TCRBV11-03	TCRBJ02-05	NA	03/0906:HD6_Tscm	1	-	-	-	-	-	-	-	-	-	-	-
7	S%GET	1.3e-14	16	16	4.4e-08	1	0.51	1	0.001	8.6e-05	global-S%GET	CASSLGETQYF	TCRBV07-02	TCRBJ02-05	NA	03/0906:HD6_Tscm	1	-	-	-	-	-	-	-	-	-	-	-
7	S%GET	1.3e-14	16	16	4.4e-08	1	0.51	1	0.001	8.6e-05	global-S%GET	CASSLGETQYF	TCRBV07-09	TCRBJ02-05	NA	03/0906:HD6_Tscm	1	-	-	-	-	-	-	-	-	-	-	-
7	S%GET	1.3e-14	16	16	4.4e-08	1	0.51	1	0.001	8.6e-05	global-S%GET	CASSLGETQYF	TCRBV12-03	TCRBJ02-05	NA	03/0906:HD6_Tscm	1	-	-	-	-	-	-	-	-	-	-	-
7	S%GET	1.3e-14	16	16	4.4e-08	1	0.51	1	0.001	8.6e-05	global-S%GET	CASSLGETQYF	TCRBV05-04	TCRBJ02-05	NA	03/0906:HD6_Tscm	1	-	-	-	-	-	-	-	-	-	-	-
7	S%GET	1.3e-14	16	16	4.4e-08	1	0.51	1	0.001	8.6e-05	global-S%GET	CASSLGETQYF	TCRBV11-02	TCRBJ02-05	NA	03/0906:HD6_Tscm	1	-	-	-	-	-	-	-	-	-	-	-
7	S%GET	1.3e-14	16	16	4.4e-08	1	0.51	1	0.001	8.6e-05	global-S%GET	CASSLGETQYF	TCRBV05-01	TCRBJ02-05	NA	03/0906:HD6_Tscm	1	-	-	-	-	-	-	-	-	-	-	-
7	S%GET	1.3e-14	16	16	4.4e-08	1	0.51	1	0.001	8.6e-05	global-S%GET	CASSLGETQYF	TCRBV07-09	TCRBJ02-05	NA	03/0907:HD7_Tscm	1	-	-	-	-	-	-	-	-	-	-	-
7	S%GET	1.3e-14	16	16	4.4e-08	1	0.51	1	0.001	8.6e-05	global-S%GET	CASSLGETQYF	TCRBV07-02	TCRBJ02-05	NA	03/0907:HD7_Tscm	1	-	-	-	-	-	-	-	-	-	-	-
7	S%GET	1.3e-14	16	16	4.4e-08	1	0.51	1	0.001	8.6e-05	global-S%GET	CASSLGETQYF	TCRBV07-03	TCRBJ02-05	NA	03/0907:HD7_Tscm	1	-	-	-	-	-	-	-	-	-	-	-
7	S%GET	1.3e-14	16	16	4.4e-08	1	0.51	1	0.001	8.6e-05	global-S%GET	CASSLGETQYF	TCRBV11-02	TCRBJ02-05	NA	03/0907:HD7_Tscm	1	-	-	-	-	-	-	-	-	-	-	-
7	S%GET	1.3e-14	16	16	4.4e-08	1	0.51	1	0.001	8.6e-05	global-S%GET	CASSLGETQYF	TCRBV07-06	TCRBJ02-05	NA	03/0907:HD7_Tscm	1	-	-	-	-	-	-	-	-	-	-	-
7	S%GET	1.3e-14	16	16	4.4e-08	1	0.51	1	0.001	8.6e-05	global-S%GET	CASSLGETQYF	TCRBV03-01	TCRBJ02-05	NA	03/0907:HD7_Tscm	1	-	-	-	-	-	-	-	-	-	-	-
7	S%GET	1.3e-14	16	16	4.4e-08	1	0.51	1	0.001	8.6e-05	global-S%GET	CASSLGETQYF	TCRBV27-01	TCRBJ02-05	NA	03/0907:HD7_Tscm	1	-	-	-	-	-	-	-	-	-	-	-
7	S%GET	1.3e-14	16	16	4.4e-08	1	0.51	1	0.001	8.6e-05	global-S%GET	CASSLGETQYF	TCRBV05-01	TCRBJ02-05	NA	03/0907:HD7_Tscm	1	-	-	-	-	-	-	-	-	-	-	-
7	S%GET	1.3e-14	16	16	4.4e-08	1	0.51	1	0.001	8.6e-05	global-S%GET	CASSLGETQYF	TCRBV12-03	TCRBJ02-05	NA	03/0907:HD7_Tscm	1	-	-	-	-	-	-	-	-	-	-	-
7	S%GET	1.3e-14	16	16	4.4e-08	1	0.51	1	0.001	8.6e-05	global-S%GET	CASSLGETQYF	TCRBV11-01	TCRBJ02-05	NA	03/0907:HD7_Tscm	1	-	-	-	-	-	-	-	-	-	-	-
7	S%GET	1.3e-14	16	16	4.4e-08	1	0.51	1	0.001	8.6e-05	global-S%GET	CASSLGETQYF	TCRBV02-01	TCRBJ02-05	NA	03/0907:HD7_Tscm	1	-	-	-	-	-	-	-	-	-	-	-
7	S%GET	1.3e-14	16	16	4.4e-08	1	0.51	1	0.001	8.6e-05	global-S%GET	CASSLGETQYF	TCRBV07-08	TCRBJ02-05	NA	03/0908:HD8_Tscm	1	-	-	-	-	-	-	-	-	-	-	-
7	S%GET	1.3e-14	16	16	4.4e-08	1	0.51	1	0.001	8.6e-05	global-S%GET	CASSLGETQYF	TCRBV07-06	TCRBJ02-05	NA	03/0908:HD8_Tscm	1	-	-	-	-	-	-	-	-	-	-	-
7	S%GET	1.3e-14	16	16	4.4e-08	1	0.51	1	0.001	8.6e-05	global-S%GET	CASSLGETQYF	TCRBV07-02	TCRBJ02-05	NA	03/0908:HD8_Tscm	1	-	-	-	-	-	-	-	-	-	-	-
7	S%GET	1.3e-14	16	16	4.4e-08	1	0.51	1	0.001	8.6e-05	global-S%GET	CASSLGETQYF	TCRBV05-05	TCRBJ02-05	NA	03/0908:HD8_Tscm	1	-	-	-	-	-	-	-	-	-	-	-
7	S%GET	1.3e-14	16	16	4.4e-08	1	0.51	1	0.001	8.6e-05	global-S%GET	CASSLGETQYF	TCRBV07-09	TCRBJ02-05	NA	03/0908:HD8_Tscm	1	-	-	-	-	-	-	-	-	-	-	-
7	S%GET	1.3e-14	16	16	4.4e-08	1	0.51	1	0.001	8.6e-05	global-S%GET	CASSLGETQYF	TCRBV05-01	TCRBJ02-05	NA	03/0910:T1D2_Tscm	1	-	-	-	-	-	-	-	-	-	-	-
7	S%GET	1.3e-14	16	16	4.4e-08	1	0.51	1	0.001	8.6e-05	global-S%GET	CASSLGETQYF	TCRBV11-02	TCRBJ02-05	NA	03/0910:T1D2_Tscm	1	-	-	-	-	-	-	-	-	-	-	-
7	S%GET	1.3e-14	16	16	4.4e-08	1	0.51	1	0.001	8.6e-05	global-S%GET	CASSLGETQYF	TCRBV28-01	TCRBJ02-05	NA	03/0910:T1D2_Tscm	1	-	-	-	-	-	-	-	-	-	-	-
7	S%GET	1.3e-14	16	16	4.4e-08	1	0.51	1	0.001	8.6e-05	global-S%GET	CASSLGETQYF	TCRBV03-01	TCRBJ02-05	NA	03/0910:T1D2_Tscm	1	-	-	-	-	-	-	-	-	-	-	-
7	S%GET	1.3e-14	16	16	4.4e-08	1	0.51	1	0.001	8.6e-05	global-S%GET	CASSLGETQYF	TCRBV12-03	TCRBJ02-05	NA	03/0910:T1D2_Tscm	1	-	-	-	-	-	-	-	-	-	-	-
7	S%GET	1.3e-14	16	16	4.4e-08	1	0.51	1	0.001	8.6e-05	global-S%GET	CASSLGETQYF	TCRBV07-02	TCRBJ02-05	NA	03/0911:T1D3_Tscm	1	-	-	-	-	-	-	-	-	-	-	-
7	S%GET	1.3e-14	16	16	4.4e-08	1	0.51	1	0.001	8.6e-05	global-S%GET	CASSLGETQYF	TCRBV05-01	TCRBJ02-05	NA	03/0911:T1D3_Tscm	1	-	-	-	-	-	-	-	-	-	-	-
7	S%GET	1.3e-14	16	16	4.4e-08	1	0.51	1	0.001	8.6e-05	global-S%GET	CASSLGETQYF	TCRBV28-01	TCRBJ02-05	NA	03/0911:T1D3_Tscm	1	-	-	-	-	-	-	-	-	-	-	-
7	S%GET	1.3e-14	16	16	4.4e-08	1	0.51	1	0.001	8.6e-05	global-S%GET	CASSLGETQYF	TCRBV11-01	TCRBJ02-05	NA	03/0911:T1D3_Tscm	1	-	-	-	-	-	-	-	-	-	-	-
7	S%GET	1.3e-14	16	16	4.4e-08	1	0.51	1	0.001	8.6e-05	global-S%GET	CASSLGETQYF	TCRBV12-03	TCRBJ02-05	NA	03/0911:T1D3_Tscm	1	-	-	-	-	-	-	-	-	-	-	-
7	S%GET	1.3e-14	16	16	4.4e-08	1	0.51	1	0.001	8.6e-05	global-S%GET	CASSLGETQYF	TCRBV12-03	TCRBJ02-05	NA	03/0912:T1D4_Tscm	1	-	-	-	-	-	-	-	-	-	-	-
7	S%GET	1.3e-14	16	16	4.4e-08	1	0.51	1	0.001	8.6e-05	global-S%GET	CASSLGETQYF	TCRBV11-02	TCRBJ02-05	NA	03/0912:T1D4_Tscm	1	-	-	-	-	-	-	-	-	-	-	-
7	S%GET	1.3e-14	16	16	4.4e-08	1	0.51	1	0.001	8.6e-05	global-S%GET	CASSLGETQYF	TCRBV05-01	TCRBJ02-05	NA	03/0912:T1D4_Tscm	1	-	-	-	-	-	-	-	-	-	-	-
7	S%GET	1.3e-14	16	16	4.4e-08	1	0.51	1	0.001	8.6e-05	global-S%GET	CASSLGETQYF	TCRBV13-01	TCRBJ02-05	NA	03/0913:T1D5_Tscm	1	-	-	-	-	-	-	-	-	-	-	-
7	S%GET	1.3e-14	16	16	4.4e-08	1	0.51	1	0.001	8.6e-05	global-S%GET	CASSLGETQYF	TCRBV07-02	TCRBJ02-05	NA	03/0913:T1D5_Tscm	1	-	-	-	-	-	-	-	-	-	-	-
7	S%GET	1.3e-14	16	16	4.4e-08	1	0.51	1	0.001	8.6e-05	global-S%GET	CASSLGETQYF	TCRBV07-06	TCRBJ02-05	NA	03/0913:T1D5_Tscm	1	-	-	-	-	-	-	-	-	-	-	-
7	S%GET	1.3e-14	16	16	4.4e-08	1	0.51	1	0.001	8.6e-05	global-S%GET	CASSLGETQYF	TCRBV11-02	TCRBJ02-05	NA	03/0914:T1D6_Tscm	1	-	-	-	-	-	-	-	-	-	-	-
7	S%GET	1.3e-14	16	16	4.4e-08	1	0.51	1	0.001	8.6e-05	global-S%GET	CASSLGETQYF	TCRBV11-03	TCRBJ02-05	NA	03/0914:T1D6_Tscm	1	-	-	-	-	-	-	-	-	-	-	-
7	S%GET	1.3e-14	16	16	4.4e-08	1	0.51	1	0.001	8.6e-05	global-S%GET	CASSLGETQYF	TCRBV07-02	TCRBJ02-05	NA	03/0914:T1D6_Tscm	1	-	-	-	-	-	-	-	-	-	-	-
7	S%GET	1.3e-14	16	16	4.4e-08	1	0.51	1	0.001	8.6e-05	global-S%GET	CASSLGETQYF	TCRBV05-04	TCRBJ02-05	NA	03/0915:T1D7_Tscm	1	-	-	-	-	-	-	-	-	-	-	-
7	S%GET	1.3e-14	16	16	4.4e-08	1	0.51	1	0.001	8.6e-05	global-S%GET	CASSLGETQYF	TCRBV11-03	TCRBJ02-05	NA	03/0915:T1D7_Tscm	1	-	-	-	-	-	-	-	-	-	-	-
7	S%GET	1.3e-14	16	16	4.4e-08	1	0.51	1	0.001	8.6e-05	global-S%GET	CASSLGETQYF	TCRBV05-01	TCRBJ02-05	NA	03/0915:T1D7_Tscm	1	-	-	-	-	-	-	-	-	-	-	-
7	S%GET	1.3e-14	16	16	4.4e-08	1	0.51	1	0.001	8.6e-05	global-S%GET	CASSLGETQYF	TCRBV13-01	TCRBJ02-05	NA	03/0915:T1D7_Tscm	1	-	-	-	-	-	-	-	-	-	-	-
7	S%GET	1.3e-14	16	16	4.4e-08	1	0.51	1	0.001	8.6e-05	global-S%GET	CASSLGETQYF	TCRBV12-03	TCRBJ02-05	NA	03/0915:T1D7_Tscm	1	-	-	-	-	-	-	-	-	-	-	-
7	S%GET	1.3e-14	16	16	4.4e-08	1	0.51	1	0.001	8.6e-05	global-S%GET	CASSLGETQYF	TCRBV07-09	TCRBJ02-05	NA	03/0915:T1D7_Tscm	1	-	-	-	-	-	-	-	-	-	-	-
7	S%GET	1.3e-14	16	16	4.4e-08	1	0.51	1	0.001	8.6e-05	global-S%GET	CASSLGETQYF	TCRBV05-06	TCRBJ02-05	NA	03/0916:T1D8_Tscm	1	-	-	-	-	-	-	-	-	-	-	-
7	S%GET	1.3e-14	16	16	4.4e-08	1	0.51	1	0.001	8.6e-05	global-S%GET	CASSLGETQYF	TCRBV05-01	TCRBJ02-05	NA	03/0916:T1D8_Tscm	1	-	-	-	-	-	-	-	-	-	-	-
7	S%GET	1.3e-14	16	16	4.4e-08	1	0.51	1	0.001	8.6e-05	global-S%GET	CASSLGETQYF	TCRBV12-03	TCRBJ02-05	NA	03/0916:T1D8_Tscm	1	-	-	-	-	-	-	-	-	-	-	-
7	S%GET	1.3e-14	16	16	4.4e-08	1	0.51	1	0.001	8.6e-05	global-S%GET	CAWSGGETQYF	TCRBV30-01	TCRBJ02-05	NA	03/0907:HD7_Tscm	1	-	-	-	-	-	-	-	-	-	-	-
8	S%SSYE	1.3e-14	8	11	4.2e-08	1	0.17	1	0.001	0.00024	global-S%SSYE	CASSGSSYEQYF	TCRBV02-01	TCRBJ02-07	NA	03/0902:HD2_Tscm	1	-	-	-	-	-	-	-	-	-	-	-
8	S%SSYE	1.3e-14	8	11	4.2e-08	1	0.17	1	0.001	0.00024	global-S%SSYE	CASSGSSYEQYF	TCRBV14-01	TCRBJ02-05	NA	03/0902:HD2_Tscm	1	-	-	-	-	-	-	-	-	-	-	-
8	S%SSYE	1.3e-14	8	11	4.2e-08	1	0.17	1	0.001	0.00024	global-S%SSYE	CASSGSSYEQYF	TCRBV18-01	TCRBJ02-07	NA	03/0902:HD2_Tscm	1	-	-	-	-	-	-	-	-	-	-	-
8	S%SSYE	1.3e-14	8	11	4.2e-08	1	0.17	1	0.001	0.00024	global-S%SSYE	CASSGSSYEQYF	TCRBV14-01	TCRBJ02-07	NA	03/0902:HD2_Tscm	1	-	-	-	-	-	-	-	-	-	-	-
8	S%SSYE	1.3e-14	8	11	4.2e-08	1	0.17	1	0.001	0.00024	global-S%SSYE	CASSGSSYEQYF	TCRBV12-03	TCRBJ02-07	NA	03/0902:HD2_Tscm	1	-	-	-	-	-	-	-	-	-	-	-
8	S%SSYE	1.3e-14	8	11	4.2e-08	1	0.17	1	0.001	0.00024	global-S%SSYE	CASSGSSYEQYF	TCRBV25-01	TCRBJ02-07	NA	03/0902:HD2_Tscm	1	-	-	-	-	-	-	-	-	-	-	-
8	S%SSYE	1.3e-14	8	11	4.2e-08	1	0.17	1	0.001	0.00024	global-S%SSYE	CASSQSSYEQYF	TCRBV02-01	TCRBJ02-07	NA	03/0906:HD6_Tscm	1	-	-	-	-	-	-	-	-	-	-	-
8	S%SSYE	1.3e-14	8	11	4.2e-08	1	0.17	1	0.001	0.00024	global-S%SSYE	CASSQSSYEQYF	TCRBV06-05	TCRBJ02-07	NA	03/0906:HD6_Tscm	1	-	-	-	-	-	-	-	-	-	-	-
8	S%SSYE	1.3e-14	8	11	4.2e-08	1	0.17	1	0.001	0.00024	global-S%SSYE	CASSQSSYEQYF	TCRBV07-02	TCRBJ02-07	NA	03/0906:HD6_Tscm	1	-	-	-	-	-	-	-	-	-	-	-
8	S%SSYE	1.3e-14	8	11	4.2e-08	1	0.17	1	0.001	0.00024	global-S%SSYE	CASSQSSYEQYF	TCRBV05-01	TCRBJ02-07	NA	03/0906:HD6_Tscm	1	-	-	-	-	-	-	-	-	-	-	-
8	S%SSYE	1.3e-14	8	11	4.2e-08	1	0.17	1	0.001	0.00024	global-S%SSYE	CASSQSSYEQYF	TCRBV06-02	TCRBJ02-07	NA	03/0906:HD6_Tscm	1	-	-	-	-	-	-	-	-	-	-	-
8	S%SSYE	1.3e-14	8	11	4.2e-08	1	0.17	1	0.001	0.00024	global-S%SSYE	CASSWSSYEQYF	TCRBV28-01	TCRBJ02-05	NA	03/0910:T1D2_Tscm	1	-	-	-	-	-	-	-	-	-	-	-
8	S%SSYE	1.3e-14	8	11	4.2e-08	1	0.17	1	0.001	0.00024	global-S%SSYE	CASSWSSYEQYF	TCRBV28-01	TCRBJ02-07	NA	03/0910:T1D2_Tscm	1	-	-	-	-	-	-	-	-	-	-	-
8	S%SSYE	1.3e-14	8	11	4.2e-08	1	0.17	1	0.001	0.00024	global-S%SSYE	CASSFSSYEQYF	TCRBV28-01	TCRBJ02-07	NA	03/0904:HD4_Tscm	1	-	-	-	-	-	-	-	-	-	-	-
8	S%SSYE	1.3e-14	8	11	4.2e-08	1	0.17	1	0.001	0.00024	global-S%SSYE	CASSFSSYEQYF	TCRBV06-02	TCRBJ02-07	NA	03/0904:HD4_Tscm	1	-	-	-	-	-	-	-	-	-	-	-
8	S%SSYE	1.3e-14	8	11	4.2e-08	1	0.17	1	0.001	0.00024	global-S%SSYE	CASSFSSYEQYF	TCRBV12-03	TCRBJ02-07	NA	03/0904:HD4_Tscm	1	-	-	-	-	-	-	-	-	-	-	-
8	S%SSYE	1.3e-14	8	11	4.2e-08	1	0.17	1	0.001	0.00024	global-S%SSYE	CASSLSSYEQYF	TCRBV27-01	TCRBJ02-07	NA	03/0906:HD6_Tscm	1	-	-	-	-	-	-	-	-	-	-	-
8	S%SSYE	1.3e-14	8	11	4.2e-08	1	0.17	1	0.001	0.00024	global-S%SSYE	CASSLSSYEQYF	TCRBV05-06	TCRBJ02-07	NA	03/0906:HD6_Tscm	1	-	-	-	-	-	-	-	-	-	-	-
8	S%SSYE	1.3e-14	8	11	4.2e-08	1	0.17	1	0.001	0.00024	global-S%SSYE	CASSLSSYEQYF	TCRBV03-01	TCRBJ02-07	NA	03/0906:HD6_Tscm	1	-	-	-	-	-	-	-	-	-	-	-
8	S%SSYE	1.3e-14	8	11	4.2e-08	1	0.17	1	0.001	0.00024	global-S%SSYE	CASSLSSYEQYF	TCRBV28-01	TCRBJ02-07	NA	03/0906:HD6_Tscm	1	-	-	-	-	-	-	-	-	-	-	-
8	S%SSYE	1.3e-14	8	11	4.2e-08	1	0.17	1	0.001	0.00024	global-S%SSYE	CASSLSSYEQYF	TCRBV18-01	TCRBJ02-07	NA	03/0906:HD6_Tscm	1	-	-	-	-	-	-	-	-	-	-	-
8	S%SSYE	1.3e-14	8	11	4.2e-08	1	0.17	1	0.001	0.00024	global-S%SSYE	CASSLSSYEQYF	TCRBV05-01	TCRBJ02-07	NA	03/0906:HD6_Tscm	1	-	-	-	-	-	-	-	-	-	-	-
8	S%SSYE	1.3e-14	8	11	4.2e-08	1	0.17	1	0.001	0.00024	global-S%SSYE	CASSLSSYEQYF	TCRBV12-03	TCRBJ02-07	NA	03/0906:HD6_Tscm	1	-	-	-	-	-	-	-	-	-	-	-
8	S%SSYE	1.3e-14	8	11	4.2e-08	1	0.17	1	0.001	0.00024	global-S%SSYE	CASSLSSYEQYF	TCRBV07-02	TCRBJ02-07	NA	03/0906:HD6_Tscm	1	-	-	-	-	-	-	-	-	-	-	-
8	S%SSYE	1.3e-14	8	11	4.2e-08	1	0.17	1	0.001	0.00024	global-S%SSYE	CASSLSSYEQYF	TCRBV12-03	TCRBJ02-07	NA	03/0907:HD7_Tscm	1	-	-	-	-	-	-	-	-	-	-	-
8	S%SSYE	1.3e-14	8	11	4.2e-08	1	0.17	1	0.001	0.00024	global-S%SSYE	CASSLSSYEQYF	TCRBV07-09	TCRBJ02-07	NA	03/0907:HD7_Tscm	1	-	-	-	-	-	-	-	-	-	-	-
8	S%SSYE	1.3e-14	8	11	4.2e-08	1	0.17	1	0.001	0.00024	global-S%SSYE	CASSLSSYEQYF	TCRBV12-03	TCRBJ02-07	NA	03/0908:HD8_Tscm	1	-	-	-	-	-	-	-	-	-	-	-
8	S%SSYE	1.3e-14	8	11	4.2e-08	1	0.17	1	0.001	0.00024	global-S%SSYE	CASSLSSYEQYF	TCRBV12-03	TCRBJ02-05	NA	03/0912:T1D4_Tscm	1	-	-	-	-	-	-	-	-	-	-	-
8	S%SSYE	1.3e-14	8	11	4.2e-08	1	0.17	1	0.001	0.00024	global-S%SSYE	CASSLSSYEQYF	TCRBV11-03	TCRBJ02-07	NA	03/0912:T1D4_Tscm	1	-	-	-	-	-	-	-	-	-	-	-
8	S%SSYE	1.3e-14	8	11	4.2e-08	1	0.17	1	0.001	0.00024	global-S%SSYE	CASSLSSYEQYF	TCRBV28-01	TCRBJ02-07	NA	03/0912:T1D4_Tscm	1	-	-	-	-	-	-	-	-	-	-	-
8	S%SSYE	1.3e-14	8	11	4.2e-08	1	0.17	1	0.001	0.00024	global-S%SSYE	CASSLSSYEQYF	TCRBV11-03	TCRBJ02-05	NA	03/0912:T1D4_Tscm	1	-	-	-	-	-	-	-	-	-	-	-
8	S%SSYE	1.3e-14	8	11	4.2e-08	1	0.17	1	0.001	0.00024	global-S%SSYE	CASSLSSYEQYF	TCRBV12-03	TCRBJ02-07	NA	03/0912:T1D4_Tscm	1	-	-	-	-	-	-	-	-	-	-	-
8	S%SSYE	1.3e-14	8	11	4.2e-08	1	0.17	1	0.001	0.00024	global-S%SSYE	CASSLSSYEQYF	TCRBV18-01	TCRBJ02-07	NA	03/0912:T1D4_Tscm	1	-	-	-	-	-	-	-	-	-	-	-
8	S%SSYE	1.3e-14	8	11	4.2e-08	1	0.17	1	0.001	0.00024	global-S%SSYE	CASSLSSYEQYF	TCRBV07-09	TCRBJ02-07	NA	03/0912:T1D4_Tscm	1	-	-	-	-	-	-	-	-	-	-	-
8	S%SSYE	1.3e-14	8	11	4.2e-08	1	0.17	1	0.001	0.00024	global-S%SSYE	CASSHSSYEQYF	TCRBV03-01	TCRBJ02-05	NA	03/0902:HD2_Tscm	1	-	-	-	-	-	-	-	-	-	-	-
8	S%SSYE	1.3e-14	8	11	4.2e-08	1	0.17	1	0.001	0.00024	global-S%SSYE	CASSHSSYEQYF	TCRBV03-01	TCRBJ02-07	NA	03/0902:HD2_Tscm	1	-	-	-	-	-	-	-	-	-	-	-
8	S%SSYE	1.3e-14	8	11	4.2e-08	1	0.17	1	0.001	0.00024	global-S%SSYE	CASSTSSYEQYF	TCRBV09-01	TCRBJ02-07	NA	03/0907:HD7_Tscm	1	-	-	-	-	-	-	-	-	-	-	-
8	S%SSYE	1.3e-14	8	11	4.2e-08	1	0.17	1	0.001	0.00024	global-S%SSYE	CASSTSSYEQYF	TCRBV18-01	TCRBJ02-07	NA	03/0907:HD7_Tscm	1	-	-	-	-	-	-	-	-	-	-	-
8	S%SSYE	1.3e-14	8	11	4.2e-08	1	0.17	1	0.001	0.00024	global-S%SSYE	CASSSSSYEQYF	TCRBV06-06	TCRBJ02-07	NA	03/0906:HD6_Tscm	1	-	-	-	-	-	-	-	-	-	-	-
8	S%SSYE	1.3e-14	8	11	4.2e-08	1	0.17	1	0.001	0.00024	global-S%SSYE	CASSSSSYEQYF	TCRBV06-02	TCRBJ02-05	NA	03/0906:HD6_Tscm	1	-	-	-	-	-	-	-	-	-	-	-
8	S%SSYE	1.3e-14	8	11	4.2e-08	1	0.17	1	0.001	0.00024	global-S%SSYE	CASSSSSYEQYF	TCRBV05-01	TCRBJ02-05	NA	03/0906:HD6_Tscm	1	-	-	-	-	-	-	-	-	-	-	-
8	S%SSYE	1.3e-14	8	11	4.2e-08	1	0.17	1	0.001	0.00024	global-S%SSYE	CASSSSSYEQYF	TCRBV06-02	TCRBJ02-07	NA	03/0906:HD6_Tscm	1	-	-	-	-	-	-	-	-	-	-	-
8	S%SSYE	1.3e-14	8	11	4.2e-08	1	0.17	1	0.001	0.00024	global-S%SSYE	CASSSSSYEQYF	TCRBV11-02	TCRBJ02-07	NA	03/0906:HD6_Tscm	1	-	-	-	-	-	-	-	-	-	-	-
8	S%SSYE	1.3e-14	8	11	4.2e-08	1	0.17	1	0.001	0.00024	global-S%SSYE	CASSSSSYEQYF	TCRBV28-01	TCRBJ02-07	NA	03/0906:HD6_Tscm	1	-	-	-	-	-	-	-	-	-	-	-
8	S%SSYE	1.3e-14	8	11	4.2e-08	1	0.17	1	0.001	0.00024	global-S%SSYE	CASSSSSYEQYF	TCRBV05-01	TCRBJ02-07	NA	03/0906:HD6_Tscm	1	-	-	-	-	-	-	-	-	-	-	-
8	S%SSYE	1.3e-14	8	11	4.2e-08	1	0.17	1	0.001	0.00024	global-S%SSYE	CASSSSSYEQYF	TCRBV06-05	TCRBJ02-07	NA	03/0915:T1D7_Tscm	1	-	-	-	-	-	-	-	-	-	-	-
8	S%SSYE	1.3e-14	8	11	4.2e-08	1	0.17	1	0.001	0.00024	global-S%SSYE	CASSSSSYEQYF	TCRBV05-01	TCRBJ02-07	NA	03/0915:T1D7_Tscm	1	-	-	-	-	-	-	-	-	-	-	-
8	S%SSYE	1.3e-14	8	11	4.2e-08	1	0.17	1	0.001	0.00024	global-S%SSYE	CASSSSSYEQYF	TCRBV07-09	TCRBJ02-07	NA	03/0915:T1D7_Tscm	1	-	-	-	-	-	-	-	-	-	-	-
8	S%SSYE	1.3e-14	8	11	4.2e-08	1	0.17	1	0.001	0.00024	global-S%SSYE	CASSSSSYEQYF	TCRBV28-01	TCRBJ02-07	NA	03/0915:T1D7_Tscm	1	-	-	-	-	-	-	-	-	-	-	-
8	S%SSYE	1.3e-14	8	11	4.2e-08	1	0.17	1	0.001	0.00024	global-S%SSYE	CASSSSSYEQYF	TCRBV07-02	TCRBJ02-07	NA	03/0915:T1D7_Tscm	1	-	-	-	-	-	-	-	-	-	-	-
8	S%SSYE	1.3e-14	8	11	4.2e-08	1	0.17	1	0.001	0.00024	global-S%SSYE	CASSASSYEQYF	TCRBV05-01	TCRBJ02-05	NA	03/0906:HD6_Tscm	1	-	-	-	-	-	-	-	-	-	-	-
8	S%SSYE	1.3e-14	8	11	4.2e-08	1	0.17	1	0.001	0.00024	global-S%SSYE	CASSASSYEQYF	TCRBV02-01	TCRBJ02-05	NA	03/0906:HD6_Tscm	1	-	-	-	-	-	-	-	-	-	-	-
8	S%SSYE	1.3e-14	8	11	4.2e-08	1	0.17	1	0.001	0.00024	global-S%SSYE	CASSASSYEQYF	TCRBV10-03	TCRBJ02-07	NA	03/0906:HD6_Tscm	1	-	-	-	-	-	-	-	-	-	-	-
8	S%SSYE	1.3e-14	8	11	4.2e-08	1	0.17	1	0.001	0.00024	global-S%SSYE	CASSASSYEQYF	TCRBV02-01	TCRBJ02-07	NA	03/0906:HD6_Tscm	1	-	-	-	-	-	-	-	-	-	-	-
8	S%SSYE	1.3e-14	8	11	4.2e-08	1	0.17	1	0.001	0.00024	global-S%SSYE	CASSASSYEQYF	TCRBV05-01	TCRBJ02-07	NA	03/0906:HD6_Tscm	1	-	-	-	-	-	-	-	-	-	-	-
8	S%SSYE	1.3e-14	8	11	4.2e-08	1	0.17	1	0.001	0.00024	global-S%SSYE	CASSASSYEQYF	TCRBV28-01	TCRBJ02-07	NA	03/0906:HD6_Tscm	1	-	-	-	-	-	-	-	-	-	-	-
8	S%SSYE	1.3e-14	8	11	4.2e-08	1	0.17	1	0.001	0.00024	global-S%SSYE	CASSYSSYEQYF	TCRBV11-02	TCRBJ02-07	NA	03/0908:HD8_Tscm	1	-	-	-	-	-	-	-	-	-	-	-
8	S%SSYE	1.3e-14	8	11	4.2e-08	1	0.17	1	0.001	0.00024	global-S%SSYE	CASSYSSYEQYF	TCRBV07-08	TCRBJ02-07	NA	03/0908:HD8_Tscm	1	-	-	-	-	-	-	-	-	-	-	-
8	S%SSYE	1.3e-14	8	11	4.2e-08	1	0.17	1	0.001	0.00024	global-S%SSYE	CASSYSSYEQYF	TCRBV07-02	TCRBJ02-07	NA	03/0908:HD8_Tscm	1	-	-	-	-	-	-	-	-	-	-	-
8	S%SSYE	1.3e-14	8	11	4.2e-08	1	0.17	1	0.001	0.00024	global-S%SSYE	CSASGSSYEQYF	TCRBV20-01	TCRBJ02-05	NA	03/0906:HD6_Tscm	1	-	-	-	-	-	-	-	-	-	-	-
8	S%SSYE	1.3e-14	8	11	4.2e-08	1	0.17	1	0.001	0.00024	global-S%SSYE	CSASGSSYEQYF	TCRBV20-01	TCRBJ02-07	NA	03/0906:HD6_Tscm	1	-	-	-	-	-	-	-	-	-	-	-
9	SL%GYE	1.7e-13	12	14	7.4e-10	1	0.01	1	0.001	7.4e-05	global-SL%GYE	CASSLAGYEQFF	TCRBV07-09	TCRBJ02-01	NA	03/0907:HD7_Tscm	1	-	-	-	-	-	-	-	-	-	-	-
9	SL%GYE	1.7e-13	12	14	7.4e-10	1	0.01	1	0.001	7.4e-05	global-SL%GYE	CASSLAGYEQFF	TCRBV07-02	TCRBJ02-01	NA	03/0907:HD7_Tscm	1	-	-	-	-	-	-	-	-	-	-	-
9	SL%GYE	1.7e-13	12	14	7.4e-10	1	0.01	1	0.001	7.4e-05	global-SL%GYE	CASSLLGYEQYF	TCRBV07-08	TCRBJ02-07	NA	03/0908:HD8_Tscm	1	-	-	-	-	-	-	-	-	-	-	-
9	SL%GYE	1.7e-13	12	14	7.4e-10	1	0.01	1	0.001	7.4e-05	global-SL%GYE	CASSLLGYEQYF	TCRBV07-02	TCRBJ02-07	NA	03/0908:HD8_Tscm	1	-	-	-	-	-	-	-	-	-	-	-
9	SL%GYE	1.7e-13	12	14	7.4e-10	1	0.01	1	0.001	7.4e-05	global-SL%GYE	CASSLVGYEQYF	TCRBV06-02	TCRBJ02-07	NA	03/0906:HD6_Tscm	1	-	-	-	-	-	-	-	-	-	-	-
9	SL%GYE	1.7e-13	12	14	7.4e-10	1	0.01	1	0.001	7.4e-05	global-SL%GYE	CASSLVGYEQYF	TCRBV28-01	TCRBJ02-07	NA	03/0906:HD6_Tscm	1	-	-	-	-	-	-	-	-	-	-	-
9	SL%GYE	1.7e-13	12	14	7.4e-10	1	0.01	1	0.001	7.4e-05	global-SL%GYE	CASSLVGYEQYF	TCRBV07-08	TCRBJ02-07	NA	03/0906:HD6_Tscm	1	-	-	-	-	-	-	-	-	-	-	-
9	SL%GYE	1.7e-13	12	14	7.4e-10	1	0.01	1	0.001	7.4e-05	global-SL%GYE	CASSLVGYEQYF	TCRBV07-02	TCRBJ02-07	NA	03/0906:HD6_Tscm	1	-	-	-	-	-	-	-	-	-	-	-
9	SL%GYE	1.7e-13	12	14	7.4e-10	1	0.01	1	0.001	7.4e-05	global-SL%GYE	CASSLVGYEQYF	TCRBV05-06	TCRBJ02-07	NA	03/0906:HD6_Tscm	1	-	-	-	-	-	-	-	-	-	-	-
9	SL%GYE	1.7e-13	12	14	7.4e-10	1	0.01	1	0.001	7.4e-05	global-SL%GYE	CASSLVGYEQYF	TCRBV05-01	TCRBJ02-07	NA	03/0906:HD6_Tscm	1	-	-	-	-	-	-	-	-	-	-	-
9	SL%GYE	1.7e-13	12	14	7.4e-10	1	0.01	1	0.001	7.4e-05	global-SL%GYE	CASSLVGYEQYF	TCRBV05-04	TCRBJ02-07	NA	03/0906:HD6_Tscm	1	-	-	-	-	-	-	-	-	-	-	-
9	SL%GYE	1.7e-13	12	14	7.4e-10	1	0.01	1	0.001	7.4e-05	global-SL%GYE	CASSLGGYEQFF	TCRBV07-09	TCRBJ02-01	NA	03/0904:HD4_Tscm	1	-	-	-	-	-	-	-	-	-	-	-
9	SL%GYE	1.7e-13	12	14	7.4e-10	1	0.01	1	0.001	7.4e-05	global-SL%GYE	CASSLQGYEQYF	TCRBV06-05	TCRBJ02-07	NA	03/0904:HD4_Tscm	1	-	-	-	-	-	-	-	-	-	-	-
9	SL%GYE	1.7e-13	12	14	7.4e-10	1	0.01	1	0.001	7.4e-05	global-SL%GYE	CASSLQGYEQYF	TCRBV07-02	TCRBJ02-07	NA	03/0904:HD4_Tscm	1	-	-	-	-	-	-	-	-	-	-	-
9	SL%GYE	1.7e-13	12	14	7.4e-10	1	0.01	1	0.001	7.4e-05	global-SL%GYE	CASSLQGYEQYF	TCRBV06-06	TCRBJ02-07	NA	03/0904:HD4_Tscm	1	-	-	-	-	-	-	-	-	-	-	-
9	SL%GYE	1.7e-13	12	14	7.4e-10	1	0.01	1	0.001	7.4e-05	global-SL%GYE	CASSLQGYEQYF	TCRBV07-09	TCRBJ02-07	NA	03/0904:HD4_Tscm	1	-	-	-	-	-	-	-	-	-	-	-
9	SL%GYE	1.7e-13	12	14	7.4e-10	1	0.01	1	0.001	7.4e-05	global-SL%GYE	CASSLQGYEQYF	TCRBV19-01	TCRBJ02-07	NA	03/0908:HD8_Tscm	1	-	-	-	-	-	-	-	-	-	-	-
9	SL%GYE	1.7e-13	12	14	7.4e-10	1	0.01	1	0.001	7.4e-05	global-SL%GYE	CASSLQGYEQYF	TCRBV05-01	TCRBJ02-07	NA	03/0909:T1D1_Tscm	1	-	-	-	-	-	-	-	-	-	-	-
9	SL%GYE	1.7e-13	12	14	7.4e-10	1	0.01	1	0.001	7.4e-05	global-SL%GYE	CASSLQGYEQYF	TCRBV04-03	TCRBJ02-07	NA	03/0909:T1D1_Tscm	1	-	-	-	-	-	-	-	-	-	-	-
9	SL%GYE	1.7e-13	12	14	7.4e-10	1	0.01	1	0.001	7.4e-05	global-SL%GYE	CASSLQGYEQYF	TCRBV12-03	TCRBJ02-07	NA	03/0911:T1D3_Tscm	1	-	-	-	-	-	-	-	-	-	-	-
9	SL%GYE	1.7e-13	12	14	7.4e-10	1	0.01	1	0.001	7.4e-05	global-SL%GYE	CASSLTGYEQFF	TCRBV07-02	TCRBJ02-01	NA	03/0905:HD5_Tscm	1	-	-	-	-	-	-	-	-	-	-	-
9	SL%GYE	1.7e-13	12	14	7.4e-10	1	0.01	1	0.001	7.4e-05	global-SL%GYE	CASSLTGYEQYF	TCRBV07-02	TCRBJ02-07	NA	03/0906:HD6_Tscm	1	-	-	-	-	-	-	-	-	-	-	-
9	SL%GYE	1.7e-13	12	14	7.4e-10	1	0.01	1	0.001	7.4e-05	global-SL%GYE	CASSLTGYEQYF	TCRBV07-09	TCRBJ02-07	NA	03/0906:HD6_Tscm	1	-	-	-	-	-	-	-	-	-	-	-
9	SL%GYE	1.7e-13	12	14	7.4e-10	1	0.01	1	0.001	7.4e-05	global-SL%GYE	CASSLTGYEQYF	TCRBV05-01	TCRBJ02-07	NA	03/0906:HD6_Tscm	1	-	-	-	-	-	-	-	-	-	-	-
9	SL%GYE	1.7e-13	12	14	7.4e-10	1	0.01	1	0.001	7.4e-05	global-SL%GYE	CASSLTGYEQYF	TCRBV28-01	TCRBJ02-07	NA	03/0906:HD6_Tscm	1	-	-	-	-	-	-	-	-	-	-	-
9	SL%GYE	1.7e-13	12	14	7.4e-10	1	0.01	1	0.001	7.4e-05	global-SL%GYE	CASSLTGYEQYF	TCRBV03-01	TCRBJ02-07	NA	03/0907:HD7_Tscm	1	-	-	-	-	-	-	-	-	-	-	-
9	SL%GYE	1.7e-13	12	14	7.4e-10	1	0.01	1	0.001	7.4e-05	global-SL%GYE	CASSLTGYEQYF	TCRBV07-08	TCRBJ02-07	NA	03/0907:HD7_Tscm	1	-	-	-	-	-	-	-	-	-	-	-
9	SL%GYE	1.7e-13	12	14	7.4e-10	1	0.01	1	0.001	7.4e-05	global-SL%GYE	CASSLTGYEQYF	TCRBV07-02	TCRBJ02-07	NA	03/0907:HD7_Tscm	1	-	-	-	-	-	-	-	-	-	-	-
9	SL%GYE	1.7e-13	12	14	7.4e-10	1	0.01	1	0.001	7.4e-05	global-SL%GYE	CASSLTGYEQYF	TCRBV07-09	TCRBJ02-07	NA	03/0907:HD7_Tscm	1	-	-	-	-	-	-	-	-	-	-	-
9	SL%GYE	1.7e-13	12	14	7.4e-10	1	0.01	1	0.001	7.4e-05	global-SL%GYE	CASSLSGYEQYF	TCRBV11-02	TCRBJ02-07	NA	03/0906:HD6_Tscm	1	-	-	-	-	-	-	-	-	-	-	-
9	SL%GYE	1.7e-13	12	14	7.4e-10	1	0.01	1	0.001	7.4e-05	global-SL%GYE	CASSLSGYEQYF	TCRBV28-01	TCRBJ02-07	NA	03/0906:HD6_Tscm	1	-	-	-	-	-	-	-	-	-	-	-
9	SL%GYE	1.7e-13	12	14	7.4e-10	1	0.01	1	0.001	7.4e-05	global-SL%GYE	CASSLSGYEQYF	TCRBV18-01	TCRBJ02-07	NA	03/0906:HD6_Tscm	1	-	-	-	-	-	-	-	-	-	-	-
9	SL%GYE	1.7e-13	12	14	7.4e-10	1	0.01	1	0.001	7.4e-05	global-SL%GYE	CASSLSGYEQYF	TCRBV07-06	TCRBJ02-07	NA	03/0906:HD6_Tscm	1	-	-	-	-	-	-	-	-	-	-	-
9	SL%GYE	1.7e-13	12	14	7.4e-10	1	0.01	1	0.001	7.4e-05	global-SL%GYE	CASSLSGYEQYF	TCRBV07-02	TCRBJ02-07	NA	03/0906:HD6_Tscm	1	-	-	-	-	-	-	-	-	-	-	-
9	SL%GYE	1.7e-13	12	14	7.4e-10	1	0.01	1	0.001	7.4e-05	global-SL%GYE	CASSLSGYEQYF	TCRBV07-09	TCRBJ02-07	NA	03/0906:HD6_Tscm	1	-	-	-	-	-	-	-	-	-	-	-
9	SL%GYE	1.7e-13	12	14	7.4e-10	1	0.01	1	0.001	7.4e-05	global-SL%GYE	CASSLSGYEQYF	TCRBV05-06	TCRBJ02-05	NA	03/0907:HD7_Tscm	1	-	-	-	-	-	-	-	-	-	-	-
9	SL%GYE	1.7e-13	12	14	7.4e-10	1	0.01	1	0.001	7.4e-05	global-SL%GYE	CASSLSGYEQYF	TCRBV12-03	TCRBJ02-05	NA	03/0907:HD7_Tscm	1	-	-	-	-	-	-	-	-	-	-	-
9	SL%GYE	1.7e-13	12	14	7.4e-10	1	0.01	1	0.001	7.4e-05	global-SL%GYE	CASSLSGYEQYF	TCRBV11-03	TCRBJ02-07	NA	03/0907:HD7_Tscm	1	-	-	-	-	-	-	-	-	-	-	-
9	SL%GYE	1.7e-13	12	14	7.4e-10	1	0.01	1	0.001	7.4e-05	global-SL%GYE	CASSLSGYEQYF	TCRBV07-09	TCRBJ02-07	NA	03/0907:HD7_Tscm	1	-	-	-	-	-	-	-	-	-	-	-
9	SL%GYE	1.7e-13	12	14	7.4e-10	1	0.01	1	0.001	7.4e-05	global-SL%GYE	CASSLSGYEQYF	TCRBV05-06	TCRBJ02-07	NA	03/0907:HD7_Tscm	1	-	-	-	-	-	-	-	-	-	-	-
9	SL%GYE	1.7e-13	12	14	7.4e-10	1	0.01	1	0.001	7.4e-05	global-SL%GYE	CASSLSGYEQYF	TCRBV28-01	TCRBJ02-07	NA	03/0907:HD7_Tscm	1	-	-	-	-	-	-	-	-	-	-	-
9	SL%GYE	1.7e-13	12	14	7.4e-10	1	0.01	1	0.001	7.4e-05	global-SL%GYE	CASSLSGYEQYF	TCRBV07-02	TCRBJ02-07	NA	03/0907:HD7_Tscm	1	-	-	-	-	-	-	-	-	-	-	-
9	SL%GYE	1.7e-13	12	14	7.4e-10	1	0.01	1	0.001	7.4e-05	global-SL%GYE	CASSLSGYEQYF	TCRBV12-03	TCRBJ02-07	NA	03/0907:HD7_Tscm	1	-	-	-	-	-	-	-	-	-	-	-
9	SL%GYE	1.7e-13	12	14	7.4e-10	1	0.01	1	0.001	7.4e-05	global-SL%GYE	CASSLSGYEQYF	TCRBV28-01	TCRBJ02-07	NA	03/0913:T1D5_Tscm	1	-	-	-	-	-	-	-	-	-	-	-
9	SL%GYE	1.7e-13	12	14	7.4e-10	1	0.01	1	0.001	7.4e-05	global-SL%GYE	CASSLLGYEQFF	TCRBV12-03	TCRBJ02-01	NA	03/0904:HD4_Tscm	1	-	-	-	-	-	-	-	-	-	-	-
9	SL%GYE	1.7e-13	12	14	7.4e-10	1	0.01	1	0.001	7.4e-05	global-SL%GYE	CASSLGGYEQYF	TCRBV02-01	TCRBJ02-07	NA	03/0902:HD2_Tscm	1	-	-	-	-	-	-	-	-	-	-	-
9	SL%GYE	1.7e-13	12	14	7.4e-10	1	0.01	1	0.001	7.4e-05	global-SL%GYE	CASSLGGYEQYF	TCRBV11-03	TCRBJ02-07	NA	03/0902:HD2_Tscm	1	-	-	-	-	-	-	-	-	-	-	-
9	SL%GYE	1.7e-13	12	14	7.4e-10	1	0.01	1	0.001	7.4e-05	global-SL%GYE	CASSLGGYEQYF	TCRBV12-03	TCRBJ02-07	NA	03/0902:HD2_Tscm	1	-	-	-	-	-	-	-	-	-	-	-
9	SL%GYE	1.7e-13	12	14	7.4e-10	1	0.01	1	0.001	7.4e-05	global-SL%GYE	CASSLGGYEQYF	TCRBV07-02	TCRBJ02-07	NA	03/0902:HD2_Tscm	1	-	-	-	-	-	-	-	-	-	-	-
9	SL%GYE	1.7e-13	12	14	7.4e-10	1	0.01	1	0.001	7.4e-05	global-SL%GYE	CASSLGGYEQYF	TCRBV06-05	TCRBJ02-07	NA	03/0902:HD2_Tscm	1	-	-	-	-	-	-	-	-	-	-	-
9	SL%GYE	1.7e-13	12	14	7.4e-10	1	0.01	1	0.001	7.4e-05	global-SL%GYE	CASSLGGYEQYF	TCRBV05-01	TCRBJ02-07	NA	03/0902:HD2_Tscm	1	-	-	-	-	-	-	-	-	-	-	-
9	SL%GYE	1.7e-13	12	14	7.4e-10	1	0.01	1	0.001	7.4e-05	global-SL%GYE	CASSLGGYEQYF	TCRBV28-01	TCRBJ02-07	NA	03/0902:HD2_Tscm	1	-	-	-	-	-	-	-	-	-	-	-
9	SL%GYE	1.7e-13	12	14	7.4e-10	1	0.01	1	0.001	7.4e-05	global-SL%GYE	CASSLGGYEQYF	TCRBV11-02	TCRBJ02-07	NA	03/0902:HD2_Tscm	1	-	-	-	-	-	-	-	-	-	-	-
9	SL%GYE	1.7e-13	12	14	7.4e-10	1	0.01	1	0.001	7.4e-05	global-SL%GYE	CASSLGGYEQYF	TCRBV07-09	TCRBJ02-07	NA	03/0902:HD2_Tscm	1	-	-	-	-	-	-	-	-	-	-	-
9	SL%GYE	1.7e-13	12	14	7.4e-10	1	0.01	1	0.001	7.4e-05	global-SL%GYE	CASSLGGYEQYF	TCRBV07-09	TCRBJ02-07	NA	03/0903:HD3_Tscm	1	-	-	-	-	-	-	-	-	-	-	-
9	SL%GYE	1.7e-13	12	14	7.4e-10	1	0.01	1	0.001	7.4e-05	global-SL%GYE	CASSLGGYEQYF	TCRBV07-02	TCRBJ02-07	NA	03/0904:HD4_Tscm	1	-	-	-	-	-	-	-	-	-	-	-
9	SL%GYE	1.7e-13	12	14	7.4e-10	1	0.01	1	0.001	7.4e-05	global-SL%GYE	CASSLGGYEQYF	TCRBV05-05	TCRBJ02-07	NA	03/0904:HD4_Tscm	1	-	-	-	-	-	-	-	-	-	-	-
9	SL%GYE	1.7e-13	12	14	7.4e-10	1	0.01	1	0.001	7.4e-05	global-SL%GYE	CASSLGGYEQYF	TCRBV05-01	TCRBJ02-07	NA	03/0904:HD4_Tscm	1	-	-	-	-	-	-	-	-	-	-	-
9	SL%GYE	1.7e-13	12	14	7.4e-10	1	0.01	1	0.001	7.4e-05	global-SL%GYE	CASSLGGYEQYF	TCRBV07-06	TCRBJ02-07	NA	03/0904:HD4_Tscm	1	-	-	-	-	-	-	-	-	-	-	-
9	SL%GYE	1.7e-13	12	14	7.4e-10	1	0.01	1	0.001	7.4e-05	global-SL%GYE	CASSLGGYEQYF	TCRBV11-02	TCRBJ02-07	NA	03/0906:HD6_Tscm	1	-	-	-	-	-	-	-	-	-	-	-
9	SL%GYE	1.7e-13	12	14	7.4e-10	1	0.01	1	0.001	7.4e-05	global-SL%GYE	CASSLGGYEQYF	TCRBV12-03	TCRBJ02-05	NA	03/0906:HD6_Tscm	1	-	-	-	-	-	-	-	-	-	-	-
9	SL%GYE	1.7e-13	12	14	7.4e-10	1	0.01	1	0.001	7.4e-05	global-SL%GYE	CASSLGGYEQYF	TCRBV07-06	TCRBJ02-05	NA	03/0906:HD6_Tscm	1	-	-	-	-	-	-	-	-	-	-	-
9	SL%GYE	1.7e-13	12	14	7.4e-10	1	0.01	1	0.001	7.4e-05	global-SL%GYE	CASSLGGYEQYF	TCRBV07-08	TCRBJ02-07	NA	03/0906:HD6_Tscm	1	-	-	-	-	-	-	-	-	-	-	-
9	SL%GYE	1.7e-13	12	14	7.4e-10	1	0.01	1	0.001	7.4e-05	global-SL%GYE	CASSLGGYEQYF	TCRBV07-03	TCRBJ02-07	NA	03/0906:HD6_Tscm	1	-	-	-	-	-	-	-	-	-	-	-
9	SL%GYE	1.7e-13	12	14	7.4e-10	1	0.01	1	0.001	7.4e-05	global-SL%GYE	CASSLGGYEQYF	TCRBV11-03	TCRBJ02-07	NA	03/0906:HD6_Tscm	1	-	-	-	-	-	-	-	-	-	-	-
9	SL%GYE	1.7e-13	12	14	7.4e-10	1	0.01	1	0.001	7.4e-05	global-SL%GYE	CASSLGGYEQYF	TCRBV05-01	TCRBJ02-07	NA	03/0906:HD6_Tscm	1	-	-	-	-	-	-	-	-	-	-	-
9	SL%GYE	1.7e-13	12	14	7.4e-10	1	0.01	1	0.001	7.4e-05	global-SL%GYE	CASSLGGYEQYF	TCRBV12-03	TCRBJ02-07	NA	03/0906:HD6_Tscm	1	-	-	-	-	-	-	-	-	-	-	-
9	SL%GYE	1.7e-13	12	14	7.4e-10	1	0.01	1	0.001	7.4e-05	global-SL%GYE	CASSLGGYEQYF	TCRBV07-09	TCRBJ02-07	NA	03/0906:HD6_Tscm	1	-	-	-	-	-	-	-	-	-	-	-
9	SL%GYE	1.7e-13	12	14	7.4e-10	1	0.01	1	0.001	7.4e-05	global-SL%GYE	CASSLGGYEQYF	TCRBV07-06	TCRBJ02-07	NA	03/0906:HD6_Tscm	1	-	-	-	-	-	-	-	-	-	-	-
9	SL%GYE	1.7e-13	12	14	7.4e-10	1	0.01	1	0.001	7.4e-05	global-SL%GYE	CASSLGGYEQYF	TCRBV07-02	TCRBJ02-07	NA	03/0906:HD6_Tscm	1	-	-	-	-	-	-	-	-	-	-	-
9	SL%GYE	1.7e-13	12	14	7.4e-10	1	0.01	1	0.001	7.4e-05	global-SL%GYE	CASSLGGYEQYF	TCRBV11-03	TCRBJ02-07	NA	03/0907:HD7_Tscm	1	-	-	-	-	-	-	-	-	-	-	-
9	SL%GYE	1.7e-13	12	14	7.4e-10	1	0.01	1	0.001	7.4e-05	global-SL%GYE	CASSLGGYEQYF	TCRBV11-02	TCRBJ02-07	NA	03/0907:HD7_Tscm	1	-	-	-	-	-	-	-	-	-	-	-
9	SL%GYE	1.7e-13	12	14	7.4e-10	1	0.01	1	0.001	7.4e-05	global-SL%GYE	CASSLGGYEQYF	TCRBV06-06	TCRBJ02-07	NA	03/0907:HD7_Tscm	1	-	-	-	-	-	-	-	-	-	-	-
9	SL%GYE	1.7e-13	12	14	7.4e-10	1	0.01	1	0.001	7.4e-05	global-SL%GYE	CASSLGGYEQYF	TCRBV28-01	TCRBJ02-07	NA	03/0907:HD7_Tscm	1	-	-	-	-	-	-	-	-	-	-	-
9	SL%GYE	1.7e-13	12	14	7.4e-10	1	0.01	1	0.001	7.4e-05	global-SL%GYE	CASSLGGYEQYF	TCRBV07-09	TCRBJ02-07	NA	03/0907:HD7_Tscm	1	-	-	-	-	-	-	-	-	-	-	-
9	SL%GYE	1.7e-13	12	14	7.4e-10	1	0.01	1	0.001	7.4e-05	global-SL%GYE	CASSLGGYEQYF	TCRBV07-02	TCRBJ02-07	NA	03/0908:HD8_Tscm	1	-	-	-	-	-	-	-	-	-	-	-
9	SL%GYE	1.7e-13	12	14	7.4e-10	1	0.01	1	0.001	7.4e-05	global-SL%GYE	CASSLGGYEQYF	TCRBV07-08	TCRBJ02-07	NA	03/0908:HD8_Tscm	1	-	-	-	-	-	-	-	-	-	-	-
9	SL%GYE	1.7e-13	12	14	7.4e-10	1	0.01	1	0.001	7.4e-05	global-SL%GYE	CASSLRGYEQFF	TCRBV07-02	TCRBJ02-01	NA	03/0915:T1D7_Tscm	1	-	-	-	-	-	-	-	-	-	-	-
9	SL%GYE	1.7e-13	12	14	7.4e-10	1	0.01	1	0.001	7.4e-05	global-SL%GYE	CASSLEGYEQYF	TCRBV07-09	TCRBJ02-07	NA	03/0903:HD3_Tscm	1	-	-	-	-	-	-	-	-	-	-	-
9	SL%GYE	1.7e-13	12	14	7.4e-10	1	0.01	1	0.001	7.4e-05	global-SL%GYE	CASSLEGYEQYF	TCRBV12-03	TCRBJ02-07	NA	03/0903:HD3_Tscm	1	-	-	-	-	-	-	-	-	-	-	-
9	SL%GYE	1.7e-13	12	14	7.4e-10	1	0.01	1	0.001	7.4e-05	global-SL%GYE	CASSLEGYEQYF	TCRBV07-06	TCRBJ02-07	NA	03/0903:HD3_Tscm	1	-	-	-	-	-	-	-	-	-	-	-
9	SL%GYE	1.7e-13	12	14	7.4e-10	1	0.01	1	0.001	7.4e-05	global-SL%GYE	CASSLDGYEQYF	TCRBV07-09	TCRBJ02-07	NA	03/0901:HD1_Tscm	1	-	-	-	-	-	-	-	-	-	-	-
9	SL%GYE	1.7e-13	12	14	7.4e-10	1	0.01	1	0.001	7.4e-05	global-SL%GYE	CASSLDGYEQYF	TCRBV07-02	TCRBJ02-07	NA	03/0901:HD1_Tscm	1	-	-	-	-	-	-	-	-	-	-	-
9	SL%GYE	1.7e-13	12	14	7.4e-10	1	0.01	1	0.001	7.4e-05	global-SL%GYE	CASSLDGYEQYF	TCRBV07-08	TCRBJ02-07	NA	03/0901:HD1_Tscm	1	-	-	-	-	-	-	-	-	-	-	-
9	SL%GYE	1.7e-13	12	14	7.4e-10	1	0.01	1	0.001	7.4e-05	global-SL%GYE	CASSLDGYEQYF	TCRBV06-01	TCRBJ02-07	NA	03/0906:HD6_Tscm	1	-	-	-	-	-	-	-	-	-	-	-
9	SL%GYE	1.7e-13	12	14	7.4e-10	1	0.01	1	0.001	7.4e-05	global-SL%GYE	CASSLDGYEQYF	TCRBV07-06	TCRBJ02-07	NA	03/0906:HD6_Tscm	1	-	-	-	-	-	-	-	-	-	-	-
9	SL%GYE	1.7e-13	12	14	7.4e-10	1	0.01	1	0.001	7.4e-05	global-SL%GYE	CASSLDGYEQYF	TCRBV07-02	TCRBJ02-07	NA	03/0906:HD6_Tscm	1	-	-	-	-	-	-	-	-	-	-	-
9	SL%GYE	1.7e-13	12	14	7.4e-10	1	0.01	1	0.001	7.4e-05	global-SL%GYE	CASSLDGYEQYF	TCRBV05-01	TCRBJ02-07	NA	03/0906:HD6_Tscm	1	-	-	-	-	-	-	-	-	-	-	-
9	SL%GYE	1.7e-13	12	14	7.4e-10	1	0.01	1	0.001	7.4e-05	global-SL%GYE	CASSLDGYEQYF	TCRBV28-01	TCRBJ02-07	NA	03/0906:HD6_Tscm	1	-	-	-	-	-	-	-	-	-	-	-
9	SL%GYE	1.7e-13	12	14	7.4e-10	1	0.01	1	0.001	7.4e-05	global-SL%GYE	CASSLAGYEQYF	TCRBV12-03	TCRBJ02-05	NA	03/0902:HD2_Tscm	1	-	-	-	-	-	-	-	-	-	-	-
9	SL%GYE	1.7e-13	12	14	7.4e-10	1	0.01	1	0.001	7.4e-05	global-SL%GYE	CASSLAGYEQYF	TCRBV07-06	TCRBJ02-07	NA	03/0902:HD2_Tscm	1	-	-	-	-	-	-	-	-	-	-	-
9	SL%GYE	1.7e-13	12	14	7.4e-10	1	0.01	1	0.001	7.4e-05	global-SL%GYE	CASSLAGYEQYF	TCRBV07-02	TCRBJ02-07	NA	03/0902:HD2_Tscm	1	-	-	-	-	-	-	-	-	-	-	-
9	SL%GYE	1.7e-13	12	14	7.4e-10	1	0.01	1	0.001	7.4e-05	global-SL%GYE	CASSLAGYEQYF	TCRBV07-08	TCRBJ02-07	NA	03/0902:HD2_Tscm	1	-	-	-	-	-	-	-	-	-	-	-
9	SL%GYE	1.7e-13	12	14	7.4e-10	1	0.01	1	0.001	7.4e-05	global-SL%GYE	CASSLAGYEQYF	TCRBV11-02	TCRBJ02-07	NA	03/0902:HD2_Tscm	1	-	-	-	-	-	-	-	-	-	-	-
9	SL%GYE	1.7e-13	12	14	7.4e-10	1	0.01	1	0.001	7.4e-05	global-SL%GYE	CASSLAGYEQYF	TCRBV12-03	TCRBJ02-07	NA	03/0902:HD2_Tscm	1	-	-	-	-	-	-	-	-	-	-	-
9	SL%GYE	1.7e-13	12	14	7.4e-10	1	0.01	1	0.001	7.4e-05	global-SL%GYE	CASSLAGYEQYF	TCRBV19-01	TCRBJ02-07	NA	03/0906:HD6_Tscm	1	-	-	-	-	-	-	-	-	-	-	-
9	SL%GYE	1.7e-13	12	14	7.4e-10	1	0.01	1	0.001	7.4e-05	global-SL%GYE	CASSLAGYEQYF	TCRBV07-02	TCRBJ02-05	NA	03/0906:HD6_Tscm	1	-	-	-	-	-	-	-	-	-	-	-
9	SL%GYE	1.7e-13	12	14	7.4e-10	1	0.01	1	0.001	7.4e-05	global-SL%GYE	CASSLAGYEQYF	TCRBV11-02	TCRBJ02-07	NA	03/0906:HD6_Tscm	1	-	-	-	-	-	-	-	-	-	-	-
9	SL%GYE	1.7e-13	12	14	7.4e-10	1	0.01	1	0.001	7.4e-05	global-SL%GYE	CASSLAGYEQYF	TCRBV05-01	TCRBJ02-07	NA	03/0906:HD6_Tscm	1	-	-	-	-	-	-	-	-	-	-	-
9	SL%GYE	1.7e-13	12	14	7.4e-10	1	0.01	1	0.001	7.4e-05	global-SL%GYE	CASSLAGYEQYF	TCRBV07-02	TCRBJ02-07	NA	03/0906:HD6_Tscm	1	-	-	-	-	-	-	-	-	-	-	-
9	SL%GYE	1.7e-13	12	14	7.4e-10	1	0.01	1	0.001	7.4e-05	global-SL%GYE	CASSLAGYEQYF	TCRBV07-08	TCRBJ02-07	NA	03/0906:HD6_Tscm	1	-	-	-	-	-	-	-	-	-	-	-
10	SL%TDT	1.4e-12	12	11	4.8e-10	1	0.002	1	0.001	0.00024	global-SL%TDT	CASSLTTDTQYF	TCRBV11-03	TCRBJ02-03	NA	03/0906:HD6_Tscm	1	-	-	-	-	-	-	-	-	-	-	-
10	SL%TDT	1.4e-12	12	11	4.8e-10	1	0.002	1	0.001	0.00024	global-SL%TDT	CASSLTTDTQYF	TCRBV05-04	TCRBJ02-03	NA	03/0906:HD6_Tscm	1	-	-	-	-	-	-	-	-	-	-	-
10	SL%TDT	1.4e-12	12	11	4.8e-10	1	0.002	1	0.001	0.00024	global-SL%TDT	CASSLTTDTQYF	TCRBV07-03	TCRBJ02-03	NA	03/0906:HD6_Tscm	1	-	-	-	-	-	-	-	-	-	-	-
10	SL%TDT	1.4e-12	12	11	4.8e-10	1	0.002	1	0.001	0.00024	global-SL%TDT	CASSLTTDTQYF	TCRBV12-03	TCRBJ02-03	NA	03/0906:HD6_Tscm	1	-	-	-	-	-	-	-	-	-	-	-
10	SL%TDT	1.4e-12	12	11	4.8e-10	1	0.002	1	0.001	0.00024	global-SL%TDT	CASSLTTDTQYF	TCRBV07-02	TCRBJ02-03	NA	03/0906:HD6_Tscm	1	-	-	-	-	-	-	-	-	-	-	-
10	SL%TDT	1.4e-12	12	11	4.8e-10	1	0.002	1	0.001	0.00024	global-SL%TDT	CASSLTTDTQYF	TCRBV12-03	TCRBJ02-03	NA	03/0910:T1D2_Tscm	1	-	-	-	-	-	-	-	-	-	-	-
10	SL%TDT	1.4e-12	12	11	4.8e-10	1	0.002	1	0.001	0.00024	global-SL%TDT	CASSLTTDTQYF	TCRBV07-06	TCRBJ02-03	NA	03/0912:T1D4_Tscm	1	-	-	-	-	-	-	-	-	-	-	-
10	SL%TDT	1.4e-12	12	11	4.8e-10	1	0.002	1	0.001	0.00024	global-SL%TDT	CASSLTTDTQYF	TCRBV12-03	TCRBJ02-03	NA	03/0912:T1D4_Tscm	1	-	-	-	-	-	-	-	-	-	-	-
10	SL%TDT	1.4e-12	12	11	4.8e-10	1	0.002	1	0.001	0.00024	global-SL%TDT	CASSLTTDTQYF	TCRBV05-01	TCRBJ02-03	NA	03/0912:T1D4_Tscm	1	-	-	-	-	-	-	-	-	-	-	-
10	SL%TDT	1.4e-12	12	11	4.8e-10	1	0.002	1	0.001	0.00024	global-SL%TDT	CASSLTTDTQYF	TCRBV28-01	TCRBJ02-03	NA	03/0912:T1D4_Tscm	1	-	-	-	-	-	-	-	-	-	-	-
10	SL%TDT	1.4e-12	12	11	4.8e-10	1	0.002	1	0.001	0.00024	global-SL%TDT	CASSLLTDTQYF	TCRBV11-03	TCRBJ02-03	NA	03/0907:HD7_Tscm	1	-	-	-	-	-	-	-	-	-	-	-
10	SL%TDT	1.4e-12	12	11	4.8e-10	1	0.002	1	0.001	0.00024	global-SL%TDT	CASSLLTDTQYF	TCRBV28-01	TCRBJ02-03	NA	03/0907:HD7_Tscm	1	-	-	-	-	-	-	-	-	-	-	-
10	SL%TDT	1.4e-12	12	11	4.8e-10	1	0.002	1	0.001	0.00024	global-SL%TDT	CASSLLTDTQYF	TCRBV12-03	TCRBJ02-03	NA	03/0915:T1D7_Tscm	1	-	-	-	-	-	-	-	-	-	-	-
10	SL%TDT	1.4e-12	12	11	4.8e-10	1	0.002	1	0.001	0.00024	global-SL%TDT	CASSLLTDTQYF	TCRBV28-01	TCRBJ02-03	NA	03/0915:T1D7_Tscm	1	-	-	-	-	-	-	-	-	-	-	-
10	SL%TDT	1.4e-12	12	11	4.8e-10	1	0.002	1	0.001	0.00024	global-SL%TDT	CASSLKTDTQYF	TCRBV05-01	TCRBJ02-03	NA	03/0908:HD8_Tscm	1	-	-	-	-	-	-	-	-	-	-	-
10	SL%TDT	1.4e-12	12	11	4.8e-10	1	0.002	1	0.001	0.00024	global-SL%TDT	CASSLSTDTQYF	TCRBV28-01	TCRBJ02-03	NA	03/0901:HD1_Tscm	1	-	-	-	-	-	-	-	-	-	-	-
10	SL%TDT	1.4e-12	12	11	4.8e-10	1	0.002	1	0.001	0.00024	global-SL%TDT	CASSLSTDTQYF	TCRBV07-08	TCRBJ02-03	NA	03/0902:HD2_Tscm	1	-	-	-	-	-	-	-	-	-	-	-
10	SL%TDT	1.4e-12	12	11	4.8e-10	1	0.002	1	0.001	0.00024	global-SL%TDT	CASSLSTDTQYF	TCRBV03-01	TCRBJ02-03	NA	03/0902:HD2_Tscm	1	-	-	-	-	-	-	-	-	-	-	-
10	SL%TDT	1.4e-12	12	11	4.8e-10	1	0.002	1	0.001	0.00024	global-SL%TDT	CASSLSTDTQYF	TCRBV07-03	TCRBJ02-03	NA	03/0902:HD2_Tscm	1	-	-	-	-	-	-	-	-	-	-	-
10	SL%TDT	1.4e-12	12	11	4.8e-10	1	0.002	1	0.001	0.00024	global-SL%TDT	CASSLSTDTQYF	TCRBV07-09	TCRBJ02-03	NA	03/0902:HD2_Tscm	1	-	-	-	-	-	-	-	-	-	-	-
10	SL%TDT	1.4e-12	12	11	4.8e-10	1	0.002	1	0.001	0.00024	global-SL%TDT	CASSLSTDTQYF	TCRBV05-01	TCRBJ02-03	NA	03/0902:HD2_Tscm	1	-	-	-	-	-	-	-	-	-	-	-
10	SL%TDT	1.4e-12	12	11	4.8e-10	1	0.002	1	0.001	0.00024	global-SL%TDT	CASSLSTDTQYF	TCRBV11-02	TCRBJ02-03	NA	03/0902:HD2_Tscm	1	-	-	-	-	-	-	-	-	-	-	-
10	SL%TDT	1.4e-12	12	11	4.8e-10	1	0.002	1	0.001	0.00024	global-SL%TDT	CASSLSTDTQYF	TCRBV07-02	TCRBJ02-03	NA	03/0902:HD2_Tscm	1	-	-	-	-	-	-	-	-	-	-	-
10	SL%TDT	1.4e-12	12	11	4.8e-10	1	0.002	1	0.001	0.00024	global-SL%TDT	CASSLSTDTQYF	TCRBV12-03	TCRBJ02-03	NA	03/0902:HD2_Tscm	1	-	-	-	-	-	-	-	-	-	-	-
10	SL%TDT	1.4e-12	12	11	4.8e-10	1	0.002	1	0.001	0.00024	global-SL%TDT	CASSLSTDTQYF	TCRBV14-01	TCRBJ02-03	NA	03/0903:HD3_Tscm	1	-	-	-	-	-	-	-	-	-	-	-
10	SL%TDT	1.4e-12	12	11	4.8e-10	1	0.002	1	0.001	0.00024	global-SL%TDT	CASSLSTDTQYF	TCRBV28-01	TCRBJ02-03	NA	03/0903:HD3_Tscm	1	-	-	-	-	-	-	-	-	-	-	-
10	SL%TDT	1.4e-12	12	11	4.8e-10	1	0.002	1	0.001	0.00024	global-SL%TDT	CASSLSTDTQYF	TCRBV07-02	TCRBJ02-03	NA	03/0903:HD3_Tscm	1	-	-	-	-	-	-	-	-	-	-	-
10	SL%TDT	1.4e-12	12	11	4.8e-10	1	0.002	1	0.001	0.00024	global-SL%TDT	CASSLSTDTQYF	TCRBV05-01	TCRBJ02-03	NA	03/0906:HD6_Tscm	1	-	-	-	-	-	-	-	-	-	-	-
10	SL%TDT	1.4e-12	12	11	4.8e-10	1	0.002	1	0.001	0.00024	global-SL%TDT	CASSLSTDTQYF	TCRBV07-09	TCRBJ02-03	NA	03/0906:HD6_Tscm	1	-	-	-	-	-	-	-	-	-	-	-
10	SL%TDT	1.4e-12	12	11	4.8e-10	1	0.002	1	0.001	0.00024	global-SL%TDT	CASSLSTDTQYF	TCRBV07-02	TCRBJ02-03	NA	03/0906:HD6_Tscm	1	-	-	-	-	-	-	-	-	-	-	-
10	SL%TDT	1.4e-12	12	11	4.8e-10	1	0.002	1	0.001	0.00024	global-SL%TDT	CASSLSTDTQYF	TCRBV07-08	TCRBJ02-03	NA	03/0906:HD6_Tscm	1	-	-	-	-	-	-	-	-	-	-	-
10	SL%TDT	1.4e-12	12	11	4.8e-10	1	0.002	1	0.001	0.00024	global-SL%TDT	CASSLSTDTQYF	TCRBV18-01	TCRBJ02-03	NA	03/0906:HD6_Tscm	1	-	-	-	-	-	-	-	-	-	-	-
10	SL%TDT	1.4e-12	12	11	4.8e-10	1	0.002	1	0.001	0.00024	global-SL%TDT	CASSLSTDTQYF	TCRBV19-01	TCRBJ02-03	NA	03/0906:HD6_Tscm	1	-	-	-	-	-	-	-	-	-	-	-
10	SL%TDT	1.4e-12	12	11	4.8e-10	1	0.002	1	0.001	0.00024	global-SL%TDT	CASSLSTDTQYF	TCRBV07-03	TCRBJ02-03	NA	03/0906:HD6_Tscm	1	-	-	-	-	-	-	-	-	-	-	-
10	SL%TDT	1.4e-12	12	11	4.8e-10	1	0.002	1	0.001	0.00024	global-SL%TDT	CASSLSTDTQYF	TCRBV05-01	TCRBJ02-03	NA	03/0912:T1D4_Tscm	1	-	-	-	-	-	-	-	-	-	-	-
10	SL%TDT	1.4e-12	12	11	4.8e-10	1	0.002	1	0.001	0.00024	global-SL%TDT	CASSLSTDTQYF	TCRBV03-01	TCRBJ02-03	NA	03/0912:T1D4_Tscm	1	-	-	-	-	-	-	-	-	-	-	-
10	SL%TDT	1.4e-12	12	11	4.8e-10	1	0.002	1	0.001	0.00024	global-SL%TDT	CASSLSTDTQYF	TCRBV28-01	TCRBJ02-03	NA	03/0912:T1D4_Tscm	1	-	-	-	-	-	-	-	-	-	-	-
10	SL%TDT	1.4e-12	12	11	4.8e-10	1	0.002	1	0.001	0.00024	global-SL%TDT	CASSLSTDTQYF	TCRBV07-09	TCRBJ02-03	NA	03/0912:T1D4_Tscm	1	-	-	-	-	-	-	-	-	-	-	-
10	SL%TDT	1.4e-12	12	11	4.8e-10	1	0.002	1	0.001	0.00024	global-SL%TDT	CASSLSTDTQYF	TCRBV07-08	TCRBJ02-03	NA	03/0912:T1D4_Tscm	1	-	-	-	-	-	-	-	-	-	-	-
10	SL%TDT	1.4e-12	12	11	4.8e-10	1	0.002	1	0.001	0.00024	global-SL%TDT	CASSLSTDTQYF	TCRBV12-03	TCRBJ02-03	NA	03/0912:T1D4_Tscm	1	-	-	-	-	-	-	-	-	-	-	-
10	SL%TDT	1.4e-12	12	11	4.8e-10	1	0.002	1	0.001	0.00024	global-SL%TDT	CASSLSTDTQYF	TCRBV02-01	TCRBJ02-03	NA	03/0912:T1D4_Tscm	1	-	-	-	-	-	-	-	-	-	-	-
10	SL%TDT	1.4e-12	12	11	4.8e-10	1	0.002	1	0.001	0.00024	global-SL%TDT	CASSLSTDTQYF	TCRBV12-03	TCRBJ02-03	NA	03/0915:T1D7_Tscm	1	-	-	-	-	-	-	-	-	-	-	-
10	SL%TDT	1.4e-12	12	11	4.8e-10	1	0.002	1	0.001	0.00024	global-SL%TDT	CASSLSTDTQYF	TCRBV11-01	TCRBJ02-03	NA	03/0915:T1D7_Tscm	1	-	-	-	-	-	-	-	-	-	-	-
10	SL%TDT	1.4e-12	12	11	4.8e-10	1	0.002	1	0.001	0.00024	global-SL%TDT	CASSLSTDTQYF	TCRBV11-02	TCRBJ02-03	NA	03/0915:T1D7_Tscm	1	-	-	-	-	-	-	-	-	-	-	-
10	SL%TDT	1.4e-12	12	11	4.8e-10	1	0.002	1	0.001	0.00024	global-SL%TDT	CASSLSTDTQYF	TCRBV05-04	TCRBJ02-03	NA	03/0915:T1D7_Tscm	1	-	-	-	-	-	-	-	-	-	-	-
10	SL%TDT	1.4e-12	12	11	4.8e-10	1	0.002	1	0.001	0.00024	global-SL%TDT	CASSLSTDTQYF	TCRBV18-01	TCRBJ02-03	NA	03/0915:T1D7_Tscm	1	-	-	-	-	-	-	-	-	-	-	-
10	SL%TDT	1.4e-12	12	11	4.8e-10	1	0.002	1	0.001	0.00024	global-SL%TDT	CASSLSTDTQYF	TCRBV28-01	TCRBJ02-03	NA	03/0915:T1D7_Tscm	1	-	-	-	-	-	-	-	-	-	-	-
10	SL%TDT	1.4e-12	12	11	4.8e-10	1	0.002	1	0.001	0.00024	global-SL%TDT	CASSLSTDTQYF	TCRBV03-01	TCRBJ02-03	NA	03/0915:T1D7_Tscm	1	-	-	-	-	-	-	-	-	-	-	-
10	SL%TDT	1.4e-12	12	11	4.8e-10	1	0.002	1	0.001	0.00024	global-SL%TDT	CASSLSTDTQYF	TCRBV07-09	TCRBJ02-03	NA	03/0916:T1D8_Tscm	1	-	-	-	-	-	-	-	-	-	-	-
10	SL%TDT	1.4e-12	12	11	4.8e-10	1	0.002	1	0.001	0.00024	global-SL%TDT	CASSLETDTQYF	TCRBV05-01	TCRBJ02-03	NA	03/0916:T1D8_Tscm	1	-	-	-	-	-	-	-	-	-	-	-
10	SL%TDT	1.4e-12	12	11	4.8e-10	1	0.002	1	0.001	0.00024	global-SL%TDT	CASSLETDTQYF	TCRBV07-09	TCRBJ02-03	NA	03/0916:T1D8_Tscm	1	-	-	-	-	-	-	-	-	-	-	-
10	SL%TDT	1.4e-12	12	11	4.8e-10	1	0.002	1	0.001	0.00024	global-SL%TDT	CASSLRTDTQYF	TCRBV06-01	TCRBJ02-03	NA	03/0902:HD2_Tscm	1	-	-	-	-	-	-	-	-	-	-	-
10	SL%TDT	1.4e-12	12	11	4.8e-10	1	0.002	1	0.001	0.00024	global-SL%TDT	CASSLRTDTQYF	TCRBV12-03	TCRBJ02-03	NA	03/0902:HD2_Tscm	1	-	-	-	-	-	-	-	-	-	-	-
10	SL%TDT	1.4e-12	12	11	4.8e-10	1	0.002	1	0.001	0.00024	global-SL%TDT	CASSLRTDTQYF	TCRBV05-04	TCRBJ02-03	NA	03/0902:HD2_Tscm	1	-	-	-	-	-	-	-	-	-	-	-
10	SL%TDT	1.4e-12	12	11	4.8e-10	1	0.002	1	0.001	0.00024	global-SL%TDT	CASSLRTDTQYF	TCRBV14-01	TCRBJ02-03	NA	03/0902:HD2_Tscm	1	-	-	-	-	-	-	-	-	-	-	-
10	SL%TDT	1.4e-12	12	11	4.8e-10	1	0.002	1	0.001	0.00024	global-SL%TDT	CASSLRTDTQYF	TCRBV11-03	TCRBJ02-03	NA	03/0906:HD6_Tscm	1	-	-	-	-	-	-	-	-	-	-	-
10	SL%TDT	1.4e-12	12	11	4.8e-10	1	0.002	1	0.001	0.00024	global-SL%TDT	CASSLRTDTQYF	TCRBV05-01	TCRBJ02-03	NA	03/0906:HD6_Tscm	1	-	-	-	-	-	-	-	-	-	-	-
10	SL%TDT	1.4e-12	12	11	4.8e-10	1	0.002	1	0.001	0.00024	global-SL%TDT	CASSLRTDTQYF	TCRBV13-01	TCRBJ02-03	NA	03/0906:HD6_Tscm	1	-	-	-	-	-	-	-	-	-	-	-
10	SL%TDT	1.4e-12	12	11	4.8e-10	1	0.002	1	0.001	0.00024	global-SL%TDT	CASSLNTDTQYF	TCRBV07-06	TCRBJ02-03	NA	03/0903:HD3_Tscm	1	-	-	-	-	-	-	-	-	-	-	-
10	SL%TDT	1.4e-12	12	11	4.8e-10	1	0.002	1	0.001	0.00024	global-SL%TDT	CASSLNTDTQYF	TCRBV07-02	TCRBJ02-03	NA	03/0903:HD3_Tscm	1	-	-	-	-	-	-	-	-	-	-	-
10	SL%TDT	1.4e-12	12	11	4.8e-10	1	0.002	1	0.001	0.00024	global-SL%TDT	CASSLNTDTQYF	TCRBV12-03	TCRBJ02-03	NA	03/0903:HD3_Tscm	1	-	-	-	-	-	-	-	-	-	-	-
10	SL%TDT	1.4e-12	12	11	4.8e-10	1	0.002	1	0.001	0.00024	global-SL%TDT	CASSLNTDTQYF	TCRBV07-09	TCRBJ02-03	NA	03/0903:HD3_Tscm	1	-	-	-	-	-	-	-	-	-	-	-
10	SL%TDT	1.4e-12	12	11	4.8e-10	1	0.002	1	0.001	0.00024	global-SL%TDT	CASSLGTDTQYF	TCRBV05-04	TCRBJ02-03	NA	03/0907:HD7_Tscm	1	-	-	-	-	-	-	-	-	-	-	-
10	SL%TDT	1.4e-12	12	11	4.8e-10	1	0.002	1	0.001	0.00024	global-SL%TDT	CASSLGTDTQYF	TCRBV05-05	TCRBJ02-03	NA	03/0907:HD7_Tscm	1	-	-	-	-	-	-	-	-	-	-	-
10	SL%TDT	1.4e-12	12	11	4.8e-10	1	0.002	1	0.001	0.00024	global-SL%TDT	CASSLGTDTQYF	TCRBV05-06	TCRBJ02-03	NA	03/0907:HD7_Tscm	1	-	-	-	-	-	-	-	-	-	-	-
10	SL%TDT	1.4e-12	12	11	4.8e-10	1	0.002	1	0.001	0.00024	global-SL%TDT	CASSLGTDTQYF	TCRBV03-01	TCRBJ02-03	NA	03/0907:HD7_Tscm	1	-	-	-	-	-	-	-	-	-	-	-
10	SL%TDT	1.4e-12	12	11	4.8e-10	1	0.002	1	0.001	0.00024	global-SL%TDT	CASSLGTDTQYF	TCRBV07-09	TCRBJ02-03	NA	03/0907:HD7_Tscm	1	-	-	-	-	-	-	-	-	-	-	-
10	SL%TDT	1.4e-12	12	11	4.8e-10	1	0.002	1	0.001	0.00024	global-SL%TDT	CASSLGTDTQYF	TCRBV07-02	TCRBJ02-03	NA	03/0914:T1D6_Tscm	1	-	-	-	-	-	-	-	-	-	-	-
10	SL%TDT	1.4e-12	12	11	4.8e-10	1	0.002	1	0.001	0.00024	global-SL%TDT	CASSLGTDTQYF	TCRBV07-08	TCRBJ02-03	NA	03/0915:T1D7_Tscm	1	-	-	-	-	-	-	-	-	-	-	-
10	SL%TDT	1.4e-12	12	11	4.8e-10	1	0.002	1	0.001	0.00024	global-SL%TDT	CASSLGTDTQYF	TCRBV09-01	TCRBJ02-03	NA	03/0915:T1D7_Tscm	1	-	-	-	-	-	-	-	-	-	-	-
10	SL%TDT	1.4e-12	12	11	4.8e-10	1	0.002	1	0.001	0.00024	global-SL%TDT	CASSLGTDTQYF	TCRBV07-02	TCRBJ02-03	NA	03/0915:T1D7_Tscm	1	-	-	-	-	-	-	-	-	-	-	-
10	SL%TDT	1.4e-12	12	11	4.8e-10	1	0.002	1	0.001	0.00024	global-SL%TDT	CASSLGTDTQYF	TCRBV07-09	TCRBJ02-03	NA	03/0915:T1D7_Tscm	1	-	-	-	-	-	-	-	-	-	-	-
10	SL%TDT	1.4e-12	12	11	4.8e-10	1	0.002	1	0.001	0.00024	global-SL%TDT	CASSLGTDTQYF	TCRBV05-01	TCRBJ02-03	NA	03/0915:T1D7_Tscm	1	-	-	-	-	-	-	-	-	-	-	-
10	SL%TDT	1.4e-12	12	11	4.8e-10	1	0.002	1	0.001	0.00024	global-SL%TDT	CASSLHTDTQYF	TCRBV05-01	TCRBJ02-03	NA	03/0906:HD6_Tscm	1	-	-	-	-	-	-	-	-	-	-	-
10	SL%TDT	1.4e-12	12	11	4.8e-10	1	0.002	1	0.001	0.00024	global-SL%TDT	CASSLHTDTQYF	TCRBV07-09	TCRBJ02-03	NA	03/0906:HD6_Tscm	1	-	-	-	-	-	-	-	-	-	-	-
10	SL%TDT	1.4e-12	12	11	4.8e-10	1	0.002	1	0.001	0.00024	global-SL%TDT	CASSLHTDTQYF	TCRBV05-04	TCRBJ02-03	NA	03/0906:HD6_Tscm	1	-	-	-	-	-	-	-	-	-	-	-
10	SL%TDT	1.4e-12	12	11	4.8e-10	1	0.002	1	0.001	0.00024	global-SL%TDT	CASSLDTDTQYF	TCRBV07-03	TCRBJ02-03	NA	03/0902:HD2_Tscm	1	-	-	-	-	-	-	-	-	-	-	-
10	SL%TDT	1.4e-12	12	11	4.8e-10	1	0.002	1	0.001	0.00024	global-SL%TDT	CASSLDTDTQYF	TCRBV11-03	TCRBJ02-03	NA	03/0902:HD2_Tscm	1	-	-	-	-	-	-	-	-	-	-	-
10	SL%TDT	1.4e-12	12	11	4.8e-10	1	0.002	1	0.001	0.00024	global-SL%TDT	CASSLDTDTQYF	TCRBV05-04	TCRBJ02-03	NA	03/0902:HD2_Tscm	1	-	-	-	-	-	-	-	-	-	-	-
10	SL%TDT	1.4e-12	12	11	4.8e-10	1	0.002	1	0.001	0.00024	global-SL%TDT	CASSLDTDTQYF	TCRBV07-09	TCRBJ02-03	NA	03/0902:HD2_Tscm	1	-	-	-	-	-	-	-	-	-	-	-
10	SL%TDT	1.4e-12	12	11	4.8e-10	1	0.002	1	0.001	0.00024	global-SL%TDT	CASSLDTDTQYF	TCRBV07-02	TCRBJ02-03	NA	03/0902:HD2_Tscm	1	-	-	-	-	-	-	-	-	-	-	-
10	SL%TDT	1.4e-12	12	11	4.8e-10	1	0.002	1	0.001	0.00024	global-SL%TDT	CASSLDTDTQYF	TCRBV07-09	TCRBJ02-03	NA	03/0910:T1D2_Tscm	1	-	-	-	-	-	-	-	-	-	-	-
10	SL%TDT	1.4e-12	12	11	4.8e-10	1	0.002	1	0.001	0.00024	global-SL%TDT	CASSLDTDTQYF	TCRBV07-02	TCRBJ02-03	NA	03/0910:T1D2_Tscm	1	-	-	-	-	-	-	-	-	-	-	-
10	SL%TDT	1.4e-12	12	11	4.8e-10	1	0.002	1	0.001	0.00024	global-SL%TDT	CASSLDTDTQYF	TCRBV18-01	TCRBJ02-03	NA	03/0915:T1D7_Tscm	1	-	-	-	-	-	-	-	-	-	-	-
10	SL%TDT	1.4e-12	12	11	4.8e-10	1	0.002	1	0.001	0.00024	global-SL%TDT	CASSLDTDTQYF	TCRBV07-02	TCRBJ02-03	NA	03/0915:T1D7_Tscm	1	-	-	-	-	-	-	-	-	-	-	-
10	SL%TDT	1.4e-12	12	11	4.8e-10	1	0.002	1	0.001	0.00024	global-SL%TDT	CASSLDTDTQYF	TCRBV05-04	TCRBJ02-03	NA	03/0915:T1D7_Tscm	1	-	-	-	-	-	-	-	-	-	-	-
10	SL%TDT	1.4e-12	12	11	4.8e-10	1	0.002	1	0.001	0.00024	global-SL%TDT	CASSLVTDTQYF	TCRBV05-01	TCRBJ02-03	NA	03/0902:HD2_Tscm	1	-	-	-	-	-	-	-	-	-	-	-
10	SL%TDT	1.4e-12	12	11	4.8e-10	1	0.002	1	0.001	0.00024	global-SL%TDT	CASSLVTDTQYF	TCRBV12-03	TCRBJ02-03	NA	03/0902:HD2_Tscm	1	-	-	-	-	-	-	-	-	-	-	-
10	SL%TDT	1.4e-12	12	11	4.8e-10	1	0.002	1	0.001	0.00024	global-SL%TDT	CASSLVTDTQYF	TCRBV18-01	TCRBJ02-03	NA	03/0902:HD2_Tscm	1	-	-	-	-	-	-	-	-	-	-	-
10	SL%TDT	1.4e-12	12	11	4.8e-10	1	0.002	1	0.001	0.00024	global-SL%TDT	CASSLVTDTQYF	TCRBV05-06	TCRBJ02-03	NA	03/0902:HD2_Tscm	1	-	-	-	-	-	-	-	-	-	-	-
10	SL%TDT	1.4e-12	12	11	4.8e-10	1	0.002	1	0.001	0.00024	global-SL%TDT	CASSLVTDTQYF	TCRBV28-01	TCRBJ02-03	NA	03/0902:HD2_Tscm	1	-	-	-	-	-	-	-	-	-	-	-
10	SL%TDT	1.4e-12	12	11	4.8e-10	1	0.002	1	0.001	0.00024	global-SL%TDT	CASSLVTDTQYF	TCRBV07-03	TCRBJ02-03	NA	03/0904:HD4_Tscm	1	-	-	-	-	-	-	-	-	-	-	-
10	SL%TDT	1.4e-12	12	11	4.8e-10	1	0.002	1	0.001	0.00024	global-SL%TDT	CASSLVTDTQYF	TCRBV07-09	TCRBJ02-03	NA	03/0904:HD4_Tscm	1	-	-	-	-	-	-	-	-	-	-	-
10	SL%TDT	1.4e-12	12	11	4.8e-10	1	0.002	1	0.001	0.00024	global-SL%TDT	CASSLVTDTQYF	TCRBV05-06	TCRBJ02-03	NA	03/0912:T1D4_Tscm	1	-	-	-	-	-	-	-	-	-	-	-
10	SL%TDT	1.4e-12	12	11	4.8e-10	1	0.002	1	0.001	0.00024	global-SL%TDT	CASSLVTDTQYF	TCRBV07-09	TCRBJ02-03	NA	03/0912:T1D4_Tscm	1	-	-	-	-	-	-	-	-	-	-	-
10	SL%TDT	1.4e-12	12	11	4.8e-10	1	0.002	1	0.001	0.00024	global-SL%TDT	CASSLVTDTQYF	TCRBV12-03	TCRBJ02-03	NA	03/0912:T1D4_Tscm	1	-	-	-	-	-	-	-	-	-	-	-
10	SL%TDT	1.4e-12	12	11	4.8e-10	1	0.002	1	0.001	0.00024	global-SL%TDT	CASSLVTDTQYF	TCRBV11-02	TCRBJ02-03	NA	03/0912:T1D4_Tscm	1	-	-	-	-	-	-	-	-	-	-	-
11	SPG%E	5.8e-12	9	10	2.4e-08	1	0.078	1	0.001	0.00031	global-SPG%E	CASSPGHEQYF	TCRBV28-01	TCRBJ02-07	NA	03/0903:HD3_Tscm	1	-	-	-	-	-	-	-	-	-	-	-
11	SPG%E	5.8e-12	9	10	2.4e-08	1	0.078	1	0.001	0.00031	global-SPG%E	CASSPGTEQYF	TCRBV18-01	TCRBJ02-07	NA	03/0906:HD6_Tscm	1	-	-	-	-	-	-	-	-	-	-	-
11	SPG%E	5.8e-12	9	10	2.4e-08	1	0.078	1	0.001	0.00031	global-SPG%E	CASSPGDEQYF	TCRBV04-02	TCRBJ02-05	NA	03/0902:HD2_Tscm	1	-	-	-	-	-	-	-	-	-	-	-
11	SPG%E	5.8e-12	9	10	2.4e-08	1	0.078	1	0.001	0.00031	global-SPG%E	CASSPGDEQYF	TCRBV06-05	TCRBJ02-07	NA	03/0902:HD2_Tscm	1	-	-	-	-	-	-	-	-	-	-	-
11	SPG%E	5.8e-12	9	10	2.4e-08	1	0.078	1	0.001	0.00031	global-SPG%E	CASSPGDEQYF	TCRBV04-02	TCRBJ02-07	NA	03/0902:HD2_Tscm	1	-	-	-	-	-	-	-	-	-	-	-
11	SPG%E	5.8e-12	9	10	2.4e-08	1	0.078	1	0.001	0.00031	global-SPG%E	CASSPGDEQYF	TCRBV12-03	TCRBJ02-07	NA	03/0902:HD2_Tscm	1	-	-	-	-	-	-	-	-	-	-	-
11	SPG%E	5.8e-12	9	10	2.4e-08	1	0.078	1	0.001	0.00031	global-SPG%E	CASSPGGEQYF	TCRBV05-01	TCRBJ02-07	NA	03/0915:T1D7_Tscm	1	-	-	-	-	-	-	-	-	-	-	-
11	SPG%E	5.8e-12	9	10	2.4e-08	1	0.078	1	0.001	0.00031	global-SPG%E	CASSPGGEQYF	TCRBV03-01	TCRBJ02-07	NA	03/0915:T1D7_Tscm	1	-	-	-	-	-	-	-	-	-	-	-
11	SPG%E	5.8e-12	9	10	2.4e-08	1	0.078	1	0.001	0.00031	global-SPG%E	CAWSPGNEQFF	TCRBV30-01	TCRBJ02-01	NA	03/0911:T1D3_Tscm	1	-	-	-	-	-	-	-	-	-	-	-
11	SPG%E	5.8e-12	9	10	2.4e-08	1	0.078	1	0.001	0.00031	global-SPG%E	CASSPGNEQFF	TCRBV18-01	TCRBJ02-01	NA	03/0906:HD6_Tscm	1	-	-	-	-	-	-	-	-	-	-	-
11	SPG%E	5.8e-12	9	10	2.4e-08	1	0.078	1	0.001	0.00031	global-SPG%E	CASSPGNEQFF	TCRBV05-01	TCRBJ02-01	NA	03/0906:HD6_Tscm	1	-	-	-	-	-	-	-	-	-	-	-
11	SPG%E	5.8e-12	9	10	2.4e-08	1	0.078	1	0.001	0.00031	global-SPG%E	CASSPGNEQFF	TCRBV07-09	TCRBJ02-01	NA	03/0906:HD6_Tscm	1	-	-	-	-	-	-	-	-	-	-	-
11	SPG%E	5.8e-12	9	10	2.4e-08	1	0.078	1	0.001	0.00031	global-SPG%E	CASSPGEELFF	TCRBV12-03	TCRBJ02-02	NA	03/0909:T1D1_Tscm	1	-	-	-	-	-	-	-	-	-	-	-
11	SPG%E	5.8e-12	9	10	2.4e-08	1	0.078	1	0.001	0.00031	global-SPG%E	CASSPGYEQYF	TCRBV25-01	TCRBJ02-05	NA	03/0906:HD6_Tscm	1	-	-	-	-	-	-	-	-	-	-	-
11	SPG%E	5.8e-12	9	10	2.4e-08	1	0.078	1	0.001	0.00031	global-SPG%E	CASSPGYEQYF	TCRBV05-01	TCRBJ02-07	NA	03/0906:HD6_Tscm	1	-	-	-	-	-	-	-	-	-	-	-
11	SPG%E	5.8e-12	9	10	2.4e-08	1	0.078	1	0.001	0.00031	global-SPG%E	CASSPGYEQYF	TCRBV25-01	TCRBJ02-07	NA	03/0906:HD6_Tscm	1	-	-	-	-	-	-	-	-	-	-	-
11	SPG%E	5.8e-12	9	10	2.4e-08	1	0.078	1	0.001	0.00031	global-SPG%E	CASSPGYEQYF	TCRBV12-03	TCRBJ02-07	NA	03/0906:HD6_Tscm	1	-	-	-	-	-	-	-	-	-	-	-
11	SPG%E	5.8e-12	9	10	2.4e-08	1	0.078	1	0.001	0.00031	global-SPG%E	CASSPGYEQYF	TCRBV18-01	TCRBJ02-07	NA	03/0906:HD6_Tscm	1	-	-	-	-	-	-	-	-	-	-	-
11	SPG%E	5.8e-12	9	10	2.4e-08	1	0.078	1	0.001	0.00031	global-SPG%E	CASSPGYEQYF	TCRBV07-02	TCRBJ02-07	NA	03/0912:T1D4_Tscm	1	-	-	-	-	-	-	-	-	-	-	-
11	SPG%E	5.8e-12	9	10	2.4e-08	1	0.078	1	0.001	0.00031	global-SPG%E	CASSPGYEQYF	TCRBV18-01	TCRBJ02-07	NA	03/0912:T1D4_Tscm	1	-	-	-	-	-	-	-	-	-	-	-
11	SPG%E	5.8e-12	9	10	2.4e-08	1	0.078	1	0.001	0.00031	global-SPG%E	CASSPGYEQYF	TCRBV07-09	TCRBJ02-07	NA	03/0912:T1D4_Tscm	1	-	-	-	-	-	-	-	-	-	-	-
11	SPG%E	5.8e-12	9	10	2.4e-08	1	0.078	1	0.001	0.00031	global-SPG%E	CASSPGQEQFF	TCRBV07-02	TCRBJ02-01	NA	03/0908:HD8_Tscm	1	-	-	-	-	-	-	-	-	-	-	-
11	SPG%E	5.8e-12	9	10	2.4e-08	1	0.078	1	0.001	0.00031	global-SPG%E	CASSPGVEQYF	TCRBV18-01	TCRBJ02-07	NA	03/0901:HD1_Tscm	1	-	-	-	-	-	-	-	-	-	-	-
12	SL%NE	5.2e-11	13	12	4.4e-08	1	0.29	1	0.001	0.00015	global-SL%NE	CASSLMNEQFF	TCRBV12-03	TCRBJ02-01	NA	03/0911:T1D3_Tscm	1	-	-	-	-	-	-	-	-	-	-	-
12	SL%NE	5.2e-11	13	12	4.4e-08	1	0.29	1	0.001	0.00015	global-SL%NE	CAWSLFNEQFF	TCRBV30-01	TCRBJ02-01	NA	03/0902:HD2_Tscm	1	-	-	-	-	-	-	-	-	-	-	-
12	SL%NE	5.2e-11	13	12	4.4e-08	1	0.29	1	0.001	0.00015	global-SL%NE	CASSLINEQFF	TCRBV07-02	TCRBJ02-01	NA	03/0902:HD2_Tscm	1	-	-	-	-	-	-	-	-	-	-	-
12	SL%NE	5.2e-11	13	12	4.4e-08	1	0.29	1	0.001	0.00015	global-SL%NE	CASSLINEQFF	TCRBV05-06	TCRBJ02-01	NA	03/0902:HD2_Tscm	1	-	-	-	-	-	-	-	-	-	-	-
12	SL%NE	5.2e-11	13	12	4.4e-08	1	0.29	1	0.001	0.00015	global-SL%NE	CASSLINEQFF	TCRBV03-01	TCRBJ02-01	NA	03/0902:HD2_Tscm	1	-	-	-	-	-	-	-	-	-	-	-
12	SL%NE	5.2e-11	13	12	4.4e-08	1	0.29	1	0.001	0.00015	global-SL%NE	CASSLINEQFF	TCRBV12-03	TCRBJ02-01	NA	03/0907:HD7_Tscm	1	-	-	-	-	-	-	-	-	-	-	-
12	SL%NE	5.2e-11	13	12	4.4e-08	1	0.29	1	0.001	0.00015	global-SL%NE	CASSLINEQFF	TCRBV07-08	TCRBJ02-01	NA	03/0907:HD7_Tscm	1	-	-	-	-	-	-	-	-	-	-	-
12	SL%NE	5.2e-11	13	12	4.4e-08	1	0.29	1	0.001	0.00015	global-SL%NE	CASSLINEQFF	TCRBV07-02	TCRBJ02-01	NA	03/0907:HD7_Tscm	1	-	-	-	-	-	-	-	-	-	-	-
12	SL%NE	5.2e-11	13	12	4.4e-08	1	0.29	1	0.001	0.00015	global-SL%NE	CASSLINEQFF	TCRBV18-01	TCRBJ02-01	NA	03/0915:T1D7_Tscm	1	-	-	-	-	-	-	-	-	-	-	-
12	SL%NE	5.2e-11	13	12	4.4e-08	1	0.29	1	0.001	0.00015	global-SL%NE	CASSLINEQFF	TCRBV06-02	TCRBJ02-01	NA	03/0915:T1D7_Tscm	1	-	-	-	-	-	-	-	-	-	-	-
12	SL%NE	5.2e-11	13	12	4.4e-08	1	0.29	1	0.001	0.00015	global-SL%NE	CASSLINEQFF	TCRBV07-09	TCRBJ02-01	NA	03/0915:T1D7_Tscm	1	-	-	-	-	-	-	-	-	-	-	-
12	SL%NE	5.2e-11	13	12	4.4e-08	1	0.29	1	0.001	0.00015	global-SL%NE	CASSLVNEQFF	TCRBV02-01	TCRBJ02-01	NA	03/0901:HD1_Tscm	1	-	-	-	-	-	-	-	-	-	-	-
12	SL%NE	5.2e-11	13	12	4.4e-08	1	0.29	1	0.001	0.00015	global-SL%NE	CASSLLNEQFF	TCRBV05-06	TCRBJ02-01	NA	03/0902:HD2_Tscm	1	-	-	-	-	-	-	-	-	-	-	-
12	SL%NE	5.2e-11	13	12	4.4e-08	1	0.29	1	0.001	0.00015	global-SL%NE	CASSLLNEQFF	TCRBV12-03	TCRBJ02-01	NA	03/0902:HD2_Tscm	1	-	-	-	-	-	-	-	-	-	-	-
12	SL%NE	5.2e-11	13	12	4.4e-08	1	0.29	1	0.001	0.00015	global-SL%NE	CASSLLNEQFF	TCRBV03-01	TCRBJ02-01	NA	03/0902:HD2_Tscm	1	-	-	-	-	-	-	-	-	-	-	-
12	SL%NE	5.2e-11	13	12	4.4e-08	1	0.29	1	0.001	0.00015	global-SL%NE	CASSLLNEQFF	TCRBV27-01	TCRBJ02-01	NA	03/0902:HD2_Tscm	1	-	-	-	-	-	-	-	-	-	-	-
12	SL%NE	5.2e-11	13	12	4.4e-08	1	0.29	1	0.001	0.00015	global-SL%NE	CASSLYNEQFF	TCRBV14-01	TCRBJ02-01	NA	03/0904:HD4_Tscm	1	-	-	-	-	-	-	-	-	-	-	-
12	SL%NE	5.2e-11	13	12	4.4e-08	1	0.29	1	0.001	0.00015	global-SL%NE	CASSLYNEQFF	TCRBV19-01	TCRBJ02-01	NA	03/0904:HD4_Tscm	1	-	-	-	-	-	-	-	-	-	-	-
12	SL%NE	5.2e-11	13	12	4.4e-08	1	0.29	1	0.001	0.00015	global-SL%NE	CASSLYNEQFF	TCRBV06-05	TCRBJ02-01	NA	03/0904:HD4_Tscm	1	-	-	-	-	-	-	-	-	-	-	-
12	SL%NE	5.2e-11	13	12	4.4e-08	1	0.29	1	0.001	0.00015	global-SL%NE	CASSLYNEQFF	TCRBV12-03	TCRBJ02-01	NA	03/0904:HD4_Tscm	1	-	-	-	-	-	-	-	-	-	-	-
12	SL%NE	5.2e-11	13	12	4.4e-08	1	0.29	1	0.001	0.00015	global-SL%NE	CASSLYNEQFF	TCRBV07-08	TCRBJ02-01	NA	03/0906:HD6_Tscm	1	-	-	-	-	-	-	-	-	-	-	-
12	SL%NE	5.2e-11	13	12	4.4e-08	1	0.29	1	0.001	0.00015	global-SL%NE	CASSLYNEQFF	TCRBV19-01	TCRBJ02-01	NA	03/0906:HD6_Tscm	1	-	-	-	-	-	-	-	-	-	-	-
12	SL%NE	5.2e-11	13	12	4.4e-08	1	0.29	1	0.001	0.00015	global-SL%NE	CASSLYNEQFF	TCRBV14-01	TCRBJ02-01	NA	03/0906:HD6_Tscm	1	-	-	-	-	-	-	-	-	-	-	-
12	SL%NE	5.2e-11	13	12	4.4e-08	1	0.29	1	0.001	0.00015	global-SL%NE	CASSLYNEQFF	TCRBV02-01	TCRBJ02-01	NA	03/0906:HD6_Tscm	1	-	-	-	-	-	-	-	-	-	-	-
12	SL%NE	5.2e-11	13	12	4.4e-08	1	0.29	1	0.001	0.00015	global-SL%NE	CASSLYNEQFF	TCRBV28-01	TCRBJ02-01	NA	03/0906:HD6_Tscm	1	-	-	-	-	-	-	-	-	-	-	-
12	SL%NE	5.2e-11	13	12	4.4e-08	1	0.29	1	0.001	0.00015	global-SL%NE	CASSLYNEQFF	TCRBV05-01	TCRBJ02-01	NA	03/0906:HD6_Tscm	1	-	-	-	-	-	-	-	-	-	-	-
12	SL%NE	5.2e-11	13	12	4.4e-08	1	0.29	1	0.001	0.00015	global-SL%NE	CASSLYNEQFF	TCRBV05-06	TCRBJ02-01	NA	03/0906:HD6_Tscm	1	-	-	-	-	-	-	-	-	-	-	-
12	SL%NE	5.2e-11	13	12	4.4e-08	1	0.29	1	0.001	0.00015	global-SL%NE	CASSLYNEQFF	TCRBV28-01	TCRBJ02-01	NA	03/0907:HD7_Tscm	1	-	-	-	-	-	-	-	-	-	-	-
12	SL%NE	5.2e-11	13	12	4.4e-08	1	0.29	1	0.001	0.00015	global-SL%NE	CASSLYNEQFF	TCRBV07-02	TCRBJ02-01	NA	03/0907:HD7_Tscm	1	-	-	-	-	-	-	-	-	-	-	-
12	SL%NE	5.2e-11	13	12	4.4e-08	1	0.29	1	0.001	0.00015	global-SL%NE	CASSLYNEQFF	TCRBV12-03	TCRBJ02-01	NA	03/0907:HD7_Tscm	1	-	-	-	-	-	-	-	-	-	-	-
12	SL%NE	5.2e-11	13	12	4.4e-08	1	0.29	1	0.001	0.00015	global-SL%NE	CASSLYNEQFF	TCRBV11-03	TCRBJ02-01	NA	03/0910:T1D2_Tscm	1	-	-	-	-	-	-	-	-	-	-	-
12	SL%NE	5.2e-11	13	12	4.4e-08	1	0.29	1	0.001	0.00015	global-SL%NE	CASSLYNEQFF	TCRBV14-01	TCRBJ02-01	NA	03/0910:T1D2_Tscm	1	-	-	-	-	-	-	-	-	-	-	-
12	SL%NE	5.2e-11	13	12	4.4e-08	1	0.29	1	0.001	0.00015	global-SL%NE	CASSLYNEQFF	TCRBV05-01	TCRBJ02-01	NA	03/0910:T1D2_Tscm	1	-	-	-	-	-	-	-	-	-	-	-
12	SL%NE	5.2e-11	13	12	4.4e-08	1	0.29	1	0.001	0.00015	global-SL%NE	CASSLYNEQFF	TCRBV07-02	TCRBJ02-01	NA	03/0915:T1D7_Tscm	1	-	-	-	-	-	-	-	-	-	-	-
12	SL%NE	5.2e-11	13	12	4.4e-08	1	0.29	1	0.001	0.00015	global-SL%NE	CASSLYNEQFF	TCRBV03-01	TCRBJ02-01	NA	03/0915:T1D7_Tscm	1	-	-	-	-	-	-	-	-	-	-	-
12	SL%NE	5.2e-11	13	12	4.4e-08	1	0.29	1	0.001	0.00015	global-SL%NE	CASSLYNEQFF	TCRBV10-02	TCRBJ02-01	NA	03/0915:T1D7_Tscm	1	-	-	-	-	-	-	-	-	-	-	-
12	SL%NE	5.2e-11	13	12	4.4e-08	1	0.29	1	0.001	0.00015	global-SL%NE	CASSLYNEQFF	TCRBV05-05	TCRBJ02-01	NA	03/0915:T1D7_Tscm	1	-	-	-	-	-	-	-	-	-	-	-
12	SL%NE	5.2e-11	13	12	4.4e-08	1	0.29	1	0.001	0.00015	global-SL%NE	CASSLYNEQFF	TCRBV07-06	TCRBJ02-01	NA	03/0915:T1D7_Tscm	1	-	-	-	-	-	-	-	-	-	-	-
12	SL%NE	5.2e-11	13	12	4.4e-08	1	0.29	1	0.001	0.00015	global-SL%NE	CASSLYNEQFF	TCRBV02-01	TCRBJ02-01	NA	03/0915:T1D7_Tscm	1	-	-	-	-	-	-	-	-	-	-	-
12	SL%NE	5.2e-11	13	12	4.4e-08	1	0.29	1	0.001	0.00015	global-SL%NE	CASSLYNEQFF	TCRBV05-06	TCRBJ02-01	NA	03/0915:T1D7_Tscm	1	-	-	-	-	-	-	-	-	-	-	-
12	SL%NE	5.2e-11	13	12	4.4e-08	1	0.29	1	0.001	0.00015	global-SL%NE	CASSLYNEQFF	TCRBV18-01	TCRBJ02-01	NA	03/0915:T1D7_Tscm	1	-	-	-	-	-	-	-	-	-	-	-
12	SL%NE	5.2e-11	13	12	4.4e-08	1	0.29	1	0.001	0.00015	global-SL%NE	CASSLYNEQFF	TCRBV06-02	TCRBJ02-01	NA	03/0916:T1D8_Tscm	1	-	-	-	-	-	-	-	-	-	-	-
12	SL%NE	5.2e-11	13	12	4.4e-08	1	0.29	1	0.001	0.00015	global-SL%NE	CASSLYNEQFF	TCRBV07-09	TCRBJ02-01	NA	03/0916:T1D8_Tscm	1	-	-	-	-	-	-	-	-	-	-	-
12	SL%NE	5.2e-11	13	12	4.4e-08	1	0.29	1	0.001	0.00015	global-SL%NE	CASSLYNEQFF	TCRBV03-01	TCRBJ02-01	NA	03/0916:T1D8_Tscm	1	-	-	-	-	-	-	-	-	-	-	-
12	SL%NE	5.2e-11	13	12	4.4e-08	1	0.29	1	0.001	0.00015	global-SL%NE	CASSLSNEQFF	TCRBV05-06	TCRBJ02-01	NA	03/0902:HD2_Tscm	1	-	-	-	-	-	-	-	-	-	-	-
12	SL%NE	5.2e-11	13	12	4.4e-08	1	0.29	1	0.001	0.00015	global-SL%NE	CASSLSNEQFF	TCRBV09-01	TCRBJ02-01	NA	03/0902:HD2_Tscm	1	-	-	-	-	-	-	-	-	-	-	-
12	SL%NE	5.2e-11	13	12	4.4e-08	1	0.29	1	0.001	0.00015	global-SL%NE	CASSLSNEQFF	TCRBV12-03	TCRBJ02-01	NA	03/0902:HD2_Tscm	1	-	-	-	-	-	-	-	-	-	-	-
12	SL%NE	5.2e-11	13	12	4.4e-08	1	0.29	1	0.001	0.00015	global-SL%NE	CASSLSNEQFF	TCRBV07-02	TCRBJ02-01	NA	03/0903:HD3_Tscm	1	-	-	-	-	-	-	-	-	-	-	-
12	SL%NE	5.2e-11	13	12	4.4e-08	1	0.29	1	0.001	0.00015	global-SL%NE	CASSLSNEQFF	TCRBV18-01	TCRBJ02-01	NA	03/0903:HD3_Tscm	1	-	-	-	-	-	-	-	-	-	-	-
12	SL%NE	5.2e-11	13	12	4.4e-08	1	0.29	1	0.001	0.00015	global-SL%NE	CASSLSNEQFF	TCRBV05-04	TCRBJ02-01	NA	03/0903:HD3_Tscm	1	-	-	-	-	-	-	-	-	-	-	-
12	SL%NE	5.2e-11	13	12	4.4e-08	1	0.29	1	0.001	0.00015	global-SL%NE	CASSLSNEQFF	TCRBV12-03	TCRBJ02-01	NA	03/0911:T1D3_Tscm	1	-	-	-	-	-	-	-	-	-	-	-
12	SL%NE	5.2e-11	13	12	4.4e-08	1	0.29	1	0.001	0.00015	global-SL%NE	CASSLDNEQFF	TCRBV05-04	TCRBJ02-01	NA	03/0914:T1D6_Tscm	1	-	-	-	-	-	-	-	-	-	-	-
12	SL%NE	5.2e-11	13	12	4.4e-08	1	0.29	1	0.001	0.00015	global-SL%NE	CASSLDNEQFF	TCRBV05-01	TCRBJ02-01	NA	03/0914:T1D6_Tscm	1	-	-	-	-	-	-	-	-	-	-	-
12	SL%NE	5.2e-11	13	12	4.4e-08	1	0.29	1	0.001	0.00015	global-SL%NE	CASSLDNEQFF	TCRBV05-01	TCRBJ02-01	NA	03/0915:T1D7_Tscm	1	-	-	-	-	-	-	-	-	-	-	-
12	SL%NE	5.2e-11	13	12	4.4e-08	1	0.29	1	0.001	0.00015	global-SL%NE	CASSLDNEQFF	TCRBV27-01	TCRBJ02-01	NA	03/0915:T1D7_Tscm	1	-	-	-	-	-	-	-	-	-	-	-
12	SL%NE	5.2e-11	13	12	4.4e-08	1	0.29	1	0.001	0.00015	global-SL%NE	CASSLGNEQFF	TCRBV07-02	TCRBJ02-01	NA	03/0902:HD2_Tscm	1	-	-	-	-	-	-	-	-	-	-	-
12	SL%NE	5.2e-11	13	12	4.4e-08	1	0.29	1	0.001	0.00015	global-SL%NE	CASSLGNEQFF	TCRBV05-04	TCRBJ02-01	NA	03/0902:HD2_Tscm	1	-	-	-	-	-	-	-	-	-	-	-
12	SL%NE	5.2e-11	13	12	4.4e-08	1	0.29	1	0.001	0.00015	global-SL%NE	CASSLGNEQFF	TCRBV07-08	TCRBJ02-01	NA	03/0902:HD2_Tscm	1	-	-	-	-	-	-	-	-	-	-	-
12	SL%NE	5.2e-11	13	12	4.4e-08	1	0.29	1	0.001	0.00015	global-SL%NE	CASSLGNEQFF	TCRBV19-01	TCRBJ02-01	NA	03/0902:HD2_Tscm	1	-	-	-	-	-	-	-	-	-	-	-
12	SL%NE	5.2e-11	13	12	4.4e-08	1	0.29	1	0.001	0.00015	global-SL%NE	CASSLGNEQFF	TCRBV07-03	TCRBJ02-01	NA	03/0902:HD2_Tscm	1	-	-	-	-	-	-	-	-	-	-	-
12	SL%NE	5.2e-11	13	12	4.4e-08	1	0.29	1	0.001	0.00015	global-SL%NE	CASSLGNEQFF	TCRBV11-02	TCRBJ02-01	NA	03/0902:HD2_Tscm	1	-	-	-	-	-	-	-	-	-	-	-
12	SL%NE	5.2e-11	13	12	4.4e-08	1	0.29	1	0.001	0.00015	global-SL%NE	CASSLGNEQFF	TCRBV28-01	TCRBJ02-01	NA	03/0903:HD3_Tscm	1	-	-	-	-	-	-	-	-	-	-	-
12	SL%NE	5.2e-11	13	12	4.4e-08	1	0.29	1	0.001	0.00015	global-SL%NE	CASSLGNEQFF	TCRBV11-03	TCRBJ02-01	NA	03/0903:HD3_Tscm	1	-	-	-	-	-	-	-	-	-	-	-
12	SL%NE	5.2e-11	13	12	4.4e-08	1	0.29	1	0.001	0.00015	global-SL%NE	CASSLGNEQFF	TCRBV07-09	TCRBJ02-01	NA	03/0903:HD3_Tscm	1	-	-	-	-	-	-	-	-	-	-	-
12	SL%NE	5.2e-11	13	12	4.4e-08	1	0.29	1	0.001	0.00015	global-SL%NE	CASSLGNEQFF	TCRBV11-02	TCRBJ02-01	NA	03/0906:HD6_Tscm	1	-	-	-	-	-	-	-	-	-	-	-
12	SL%NE	5.2e-11	13	12	4.4e-08	1	0.29	1	0.001	0.00015	global-SL%NE	CASSLGNEQFF	TCRBV07-09	TCRBJ02-01	NA	03/0906:HD6_Tscm	1	-	-	-	-	-	-	-	-	-	-	-
12	SL%NE	5.2e-11	13	12	4.4e-08	1	0.29	1	0.001	0.00015	global-SL%NE	CASSLGNEQFF	TCRBV05-01	TCRBJ02-01	NA	03/0906:HD6_Tscm	1	-	-	-	-	-	-	-	-	-	-	-
12	SL%NE	5.2e-11	13	12	4.4e-08	1	0.29	1	0.001	0.00015	global-SL%NE	CASSLGNEQFF	TCRBV11-01	TCRBJ02-01	NA	03/0906:HD6_Tscm	1	-	-	-	-	-	-	-	-	-	-	-
12	SL%NE	5.2e-11	13	12	4.4e-08	1	0.29	1	0.001	0.00015	global-SL%NE	CASSLTNEQFF	TCRBV07-06	TCRBJ02-01	NA	03/0912:T1D4_Tscm	1	-	-	-	-	-	-	-	-	-	-	-
12	SL%NE	5.2e-11	13	12	4.4e-08	1	0.29	1	0.001	0.00015	global-SL%NE	CASSLTNEQFF	TCRBV07-09	TCRBJ02-01	NA	03/0912:T1D4_Tscm	1	-	-	-	-	-	-	-	-	-	-	-
12	SL%NE	5.2e-11	13	12	4.4e-08	1	0.29	1	0.001	0.00015	global-SL%NE	CASSLRNEQYF	TCRBV05-01	TCRBJ02-07	NA	03/0904:HD4_Tscm	1	-	-	-	-	-	-	-	-	-	-	-
12	SL%NE	5.2e-11	13	12	4.4e-08	1	0.29	1	0.001	0.00015	global-SL%NE	CASSLRNEQYF	TCRBV07-09	TCRBJ02-07	NA	03/0914:T1D6_Tscm	1	-	-	-	-	-	-	-	-	-	-	-
12	SL%NE	5.2e-11	13	12	4.4e-08	1	0.29	1	0.001	0.00015	global-SL%NE	CASSLNNEQFF	TCRBV04-02	TCRBJ02-01	NA	03/0906:HD6_Tscm	1	-	-	-	-	-	-	-	-	-	-	-
12	SL%NE	5.2e-11	13	12	4.4e-08	1	0.29	1	0.001	0.00015	global-SL%NE	CASSLNNEQFF	TCRBV05-01	TCRBJ02-01	NA	03/0906:HD6_Tscm	1	-	-	-	-	-	-	-	-	-	-	-
12	SL%NE	5.2e-11	13	12	4.4e-08	1	0.29	1	0.001	0.00015	global-SL%NE	CASSLNNEQFF	TCRBV11-02	TCRBJ02-01	NA	03/0906:HD6_Tscm	1	-	-	-	-	-	-	-	-	-	-	-
12	SL%NE	5.2e-11	13	12	4.4e-08	1	0.29	1	0.001	0.00015	global-SL%NE	CASSLNNEQFF	TCRBV07-02	TCRBJ02-01	NA	03/0906:HD6_Tscm	1	-	-	-	-	-	-	-	-	-	-	-
12	SL%NE	5.2e-11	13	12	4.4e-08	1	0.29	1	0.001	0.00015	global-SL%NE	CASSLNNEQFF	TCRBV07-08	TCRBJ02-01	NA	03/0906:HD6_Tscm	1	-	-	-	-	-	-	-	-	-	-	-
12	SL%NE	5.2e-11	13	12	4.4e-08	1	0.29	1	0.001	0.00015	global-SL%NE	CASSLNNEQFF	TCRBV28-01	TCRBJ02-01	NA	03/0906:HD6_Tscm	1	-	-	-	-	-	-	-	-	-	-	-
12	SL%NE	5.2e-11	13	12	4.4e-08	1	0.29	1	0.001	0.00015	global-SL%NE	CASSLNNEQFF	TCRBV05-04	TCRBJ02-01	NA	03/0906:HD6_Tscm	1	-	-	-	-	-	-	-	-	-	-	-
12	SL%NE	5.2e-11	13	12	4.4e-08	1	0.29	1	0.001	0.00015	global-SL%NE	CASSLNNEQFF	TCRBV07-09	TCRBJ02-01	NA	03/0906:HD6_Tscm	1	-	-	-	-	-	-	-	-	-	-	-
12	SL%NE	5.2e-11	13	12	4.4e-08	1	0.29	1	0.001	0.00015	global-SL%NE	CASSLNNEQFF	TCRBV11-02	TCRBJ02-01	NA	03/0907:HD7_Tscm	1	-	-	-	-	-	-	-	-	-	-	-
12	SL%NE	5.2e-11	13	12	4.4e-08	1	0.29	1	0.001	0.00015	global-SL%NE	CASSLNNEQFF	TCRBV03-01	TCRBJ02-01	NA	03/0907:HD7_Tscm	1	-	-	-	-	-	-	-	-	-	-	-
12	SL%NE	5.2e-11	13	12	4.4e-08	1	0.29	1	0.001	0.00015	global-SL%NE	CASSLNNEQFF	TCRBV06-02	TCRBJ02-01	NA	03/0907:HD7_Tscm	1	-	-	-	-	-	-	-	-	-	-	-
12	SL%NE	5.2e-11	13	12	4.4e-08	1	0.29	1	0.001	0.00015	global-SL%NE	CASSLNNEQFF	TCRBV28-01	TCRBJ02-01	NA	03/0908:HD8_Tscm	1	-	-	-	-	-	-	-	-	-	-	-
12	SL%NE	5.2e-11	13	12	4.4e-08	1	0.29	1	0.001	0.00015	global-SL%NE	CASSLNNEQFF	TCRBV05-01	TCRBJ02-01	NA	03/0910:T1D2_Tscm	1	-	-	-	-	-	-	-	-	-	-	-
12	SL%NE	5.2e-11	13	12	4.4e-08	1	0.29	1	0.001	0.00015	global-SL%NE	CASSLNNEQFF	TCRBV12-03	TCRBJ02-01	NA	03/0910:T1D2_Tscm	1	-	-	-	-	-	-	-	-	-	-	-
13	SLV%E	7.8e-11	8	9	4.8e-10	1	0.001	1	0.001	0.00048	global-SLV%E	CASSLVAEQYF	TCRBV07-09	TCRBJ02-07	NA	03/0913:T1D5_Tscm	1	-	-	-	-	-	-	-	-	-	-	-
13	SLV%E	7.8e-11	8	9	4.8e-10	1	0.001	1	0.001	0.00048	global-SLV%E	CASSLVREQFF	TCRBV07-09	TCRBJ02-01	NA	03/0906:HD6_Tscm	1	-	-	-	-	-	-	-	-	-	-	-
13	SLV%E	7.8e-11	8	9	4.8e-10	1	0.001	1	0.001	0.00048	global-SLV%E	CASSLVHEQYF	TCRBV07-09	TCRBJ02-07	NA	03/0914:T1D6_Tscm	1	-	-	-	-	-	-	-	-	-	-	-
13	SLV%E	7.8e-11	8	9	4.8e-10	1	0.001	1	0.001	0.00048	global-SLV%E	CASSLVDEQFF	TCRBV28-01	TCRBJ02-01	NA	03/0906:HD6_Tscm	1	-	-	-	-	-	-	-	-	-	-	-
13	SLV%E	7.8e-11	8	9	4.8e-10	1	0.001	1	0.001	0.00048	global-SLV%E	CASSLVDEQFF	TCRBV11-02	TCRBJ02-01	NA	03/0906:HD6_Tscm	1	-	-	-	-	-	-	-	-	-	-	-
13	SLV%E	7.8e-11	8	9	4.8e-10	1	0.001	1	0.001	0.00048	global-SLV%E	CASSLVDEQFF	TCRBV07-09	TCRBJ02-01	NA	03/0906:HD6_Tscm	1	-	-	-	-	-	-	-	-	-	-	-
13	SLV%E	7.8e-11	8	9	4.8e-10	1	0.001	1	0.001	0.00048	global-SLV%E	CASSLVDEQYF	TCRBV11-02	TCRBJ02-07	NA	03/0915:T1D7_Tscm	1	-	-	-	-	-	-	-	-	-	-	-
13	SLV%E	7.8e-11	8	9	4.8e-10	1	0.001	1	0.001	0.00048	global-SLV%E	CASSLVDEQYF	TCRBV12-03	TCRBJ02-07	NA	03/0915:T1D7_Tscm	1	-	-	-	-	-	-	-	-	-	-	-
13	SLV%E	7.8e-11	8	9	4.8e-10	1	0.001	1	0.001	0.00048	global-SLV%E	CASSLVYEQYF	TCRBV07-09	TCRBJ02-05	NA	03/0903:HD3_Tscm	1	-	-	-	-	-	-	-	-	-	-	-
13	SLV%E	7.8e-11	8	9	4.8e-10	1	0.001	1	0.001	0.00048	global-SLV%E	CASSLVYEQYF	TCRBV07-06	TCRBJ02-07	NA	03/0903:HD3_Tscm	1	-	-	-	-	-	-	-	-	-	-	-
13	SLV%E	7.8e-11	8	9	4.8e-10	1	0.001	1	0.001	0.00048	global-SLV%E	CASSLVYEQYF	TCRBV07-09	TCRBJ02-07	NA	03/0903:HD3_Tscm	1	-	-	-	-	-	-	-	-	-	-	-
13	SLV%E	7.8e-11	8	9	4.8e-10	1	0.001	1	0.001	0.00048	global-SLV%E	CASSLVYEQYF	TCRBV07-02	TCRBJ02-07	NA	03/0903:HD3_Tscm	1	-	-	-	-	-	-	-	-	-	-	-
13	SLV%E	7.8e-11	8	9	4.8e-10	1	0.001	1	0.001	0.00048	global-SLV%E	CASSLVYEQYF	TCRBV07-02	TCRBJ02-05	NA	03/0904:HD4_Tscm	1	-	-	-	-	-	-	-	-	-	-	-
13	SLV%E	7.8e-11	8	9	4.8e-10	1	0.001	1	0.001	0.00048	global-SLV%E	CASSLVYEQYF	TCRBV07-02	TCRBJ02-07	NA	03/0904:HD4_Tscm	1	-	-	-	-	-	-	-	-	-	-	-
13	SLV%E	7.8e-11	8	9	4.8e-10	1	0.001	1	0.001	0.00048	global-SLV%E	CASSLVYEQYF	TCRBV12-03	TCRBJ02-07	NA	03/0904:HD4_Tscm	1	-	-	-	-	-	-	-	-	-	-	-
13	SLV%E	7.8e-11	8	9	4.8e-10	1	0.001	1	0.001	0.00048	global-SLV%E	CASSLVYEQYF	TCRBV07-02	TCRBJ02-05	NA	03/0906:HD6_Tscm	1	-	-	-	-	-	-	-	-	-	-	-
13	SLV%E	7.8e-11	8	9	4.8e-10	1	0.001	1	0.001	0.00048	global-SLV%E	CASSLVYEQYF	TCRBV12-03	TCRBJ02-07	NA	03/0906:HD6_Tscm	1	-	-	-	-	-	-	-	-	-	-	-
13	SLV%E	7.8e-11	8	9	4.8e-10	1	0.001	1	0.001	0.00048	global-SLV%E	CASSLVYEQYF	TCRBV28-01	TCRBJ02-07	NA	03/0906:HD6_Tscm	1	-	-	-	-	-	-	-	-	-	-	-
13	SLV%E	7.8e-11	8	9	4.8e-10	1	0.001	1	0.001	0.00048	global-SLV%E	CASSLVYEQYF	TCRBV07-02	TCRBJ02-07	NA	03/0906:HD6_Tscm	1	-	-	-	-	-	-	-	-	-	-	-
13	SLV%E	7.8e-11	8	9	4.8e-10	1	0.001	1	0.001	0.00048	global-SLV%E	CASSLVYEQYF	TCRBV07-09	TCRBJ02-07	NA	03/0906:HD6_Tscm	1	-	-	-	-	-	-	-	-	-	-	-
13	SLV%E	7.8e-11	8	9	4.8e-10	1	0.001	1	0.001	0.00048	global-SLV%E	CASSLVYEQYF	TCRBV07-09	TCRBJ02-07	NA	03/0912:T1D4_Tscm	1	-	-	-	-	-	-	-	-	-	-	-
13	SLV%E	7.8e-11	8	9	4.8e-10	1	0.001	1	0.001	0.00048	global-SLV%E	CASSLVNEQFF	TCRBV02-01	TCRBJ02-01	NA	03/0901:HD1_Tscm	1	-	-	-	-	-	-	-	-	-	-	-
13	SLV%E	7.8e-11	8	9	4.8e-10	1	0.001	1	0.001	0.00048	global-SLV%E	CASSLVGELFF	TCRBV07-02	TCRBJ02-02	NA	03/0906:HD6_Tscm	1	-	-	-	-	-	-	-	-	-	-	-
13	SLV%E	7.8e-11	8	9	4.8e-10	1	0.001	1	0.001	0.00048	global-SLV%E	CASSLVGELFF	TCRBV11-02	TCRBJ02-02	NA	03/0906:HD6_Tscm	1	-	-	-	-	-	-	-	-	-	-	-
13	SLV%E	7.8e-11	8	9	4.8e-10	1	0.001	1	0.001	0.00048	global-SLV%E	CASSLVGELFF	TCRBV07-08	TCRBJ02-02	NA	03/0906:HD6_Tscm	1	-	-	-	-	-	-	-	-	-	-	-
13	SLV%E	7.8e-11	8	9	4.8e-10	1	0.001	1	0.001	0.00048	global-SLV%E	CASSLVGELFF	TCRBV07-09	TCRBJ02-02	NA	03/0906:HD6_Tscm	1	-	-	-	-	-	-	-	-	-	-	-
13	SLV%E	7.8e-11	8	9	4.8e-10	1	0.001	1	0.001	0.00048	global-SLV%E	CASSLVREQYF	TCRBV12-03	TCRBJ02-07	NA	03/0904:HD4_Tscm	1	-	-	-	-	-	-	-	-	-	-	-
14	SL%RET	1.1e-10	8	9	2.9e-08	1	0.061	1	0.001	0.00048	global-SL%RET	CASSLDRETQYF	TCRBV11-02	TCRBJ02-05	NA	03/0902:HD2_Tscm	1	-	-	-	-	-	-	-	-	-	-	-
14	SL%RET	1.1e-10	8	9	2.9e-08	1	0.061	1	0.001	0.00048	global-SL%RET	CASSLDRETQYF	TCRBV07-02	TCRBJ02-05	NA	03/0902:HD2_Tscm	1	-	-	-	-	-	-	-	-	-	-	-
14	SL%RET	1.1e-10	8	9	2.9e-08	1	0.061	1	0.001	0.00048	global-SL%RET	CASSLQRETQYF	TCRBV05-01	TCRBJ02-05	NA	03/0908:HD8_Tscm	1	-	-	-	-	-	-	-	-	-	-	-
14	SL%RET	1.1e-10	8	9	2.9e-08	1	0.061	1	0.001	0.00048	global-SL%RET	CASSLNRETQYF	TCRBV12-03	TCRBJ02-05	NA	03/0915:T1D7_Tscm	1	-	-	-	-	-	-	-	-	-	-	-
14	SL%RET	1.1e-10	8	9	2.9e-08	1	0.061	1	0.001	0.00048	global-SL%RET	CASSLLRETQYF	TCRBV07-02	TCRBJ02-05	NA	03/0913:T1D5_Tscm	1	-	-	-	-	-	-	-	-	-	-	-
14	SL%RET	1.1e-10	8	9	2.9e-08	1	0.061	1	0.001	0.00048	global-SL%RET	CASSLLRETQYF	TCRBV18-01	TCRBJ02-05	NA	03/0913:T1D5_Tscm	1	-	-	-	-	-	-	-	-	-	-	-
14	SL%RET	1.1e-10	8	9	2.9e-08	1	0.061	1	0.001	0.00048	global-SL%RET	CASSLIRETQYF	TCRBV12-03	TCRBJ02-05	NA	03/0913:T1D5_Tscm	1	-	-	-	-	-	-	-	-	-	-	-
14	SL%RET	1.1e-10	8	9	2.9e-08	1	0.061	1	0.001	0.00048	global-SL%RET	CASSLVRETQYF	TCRBV11-02	TCRBJ02-05	NA	03/0903:HD3_Tscm	1	-	-	-	-	-	-	-	-	-	-	-
14	SL%RET	1.1e-10	8	9	2.9e-08	1	0.061	1	0.001	0.00048	global-SL%RET	CASSLVRETQYF	TCRBV07-06	TCRBJ02-05	NA	03/0903:HD3_Tscm	1	-	-	-	-	-	-	-	-	-	-	-
14	SL%RET	1.1e-10	8	9	2.9e-08	1	0.061	1	0.001	0.00048	global-SL%RET	CASSLVRETQYF	TCRBV07-09	TCRBJ02-05	NA	03/0903:HD3_Tscm	1	-	-	-	-	-	-	-	-	-	-	-
14	SL%RET	1.1e-10	8	9	2.9e-08	1	0.061	1	0.001	0.00048	global-SL%RET	CASSLVRETQYF	TCRBV07-02	TCRBJ02-05	NA	03/0903:HD3_Tscm	1	-	-	-	-	-	-	-	-	-	-	-
14	SL%RET	1.1e-10	8	9	2.9e-08	1	0.061	1	0.001	0.00048	global-SL%RET	CASSLVRETQYF	TCRBV05-01	TCRBJ02-05	NA	03/0915:T1D7_Tscm	1	-	-	-	-	-	-	-	-	-	-	-
14	SL%RET	1.1e-10	8	9	2.9e-08	1	0.061	1	0.001	0.00048	global-SL%RET	CASSLVRETQYF	TCRBV28-01	TCRBJ02-05	NA	03/0915:T1D7_Tscm	1	-	-	-	-	-	-	-	-	-	-	-
14	SL%RET	1.1e-10	8	9	2.9e-08	1	0.061	1	0.001	0.00048	global-SL%RET	CASSLVRETQYF	TCRBV07-02	TCRBJ02-05	NA	03/0915:T1D7_Tscm	1	-	-	-	-	-	-	-	-	-	-	-
14	SL%RET	1.1e-10	8	9	2.9e-08	1	0.061	1	0.001	0.00048	global-SL%RET	CASSLVRETQYF	TCRBV07-02	TCRBJ02-05	NA	03/0916:T1D8_Tscm	1	-	-	-	-	-	-	-	-	-	-	-
14	SL%RET	1.1e-10	8	9	2.9e-08	1	0.061	1	0.001	0.00048	global-SL%RET	CASSLVRETQYF	TCRBV07-09	TCRBJ02-05	NA	03/0916:T1D8_Tscm	1	-	-	-	-	-	-	-	-	-	-	-
14	SL%RET	1.1e-10	8	9	2.9e-08	1	0.061	1	0.001	0.00048	global-SL%RET	CASSLFRETQYF	TCRBV12-03	TCRBJ02-05	NA	03/0904:HD4_Tscm	1	-	-	-	-	-	-	-	-	-	-	-
14	SL%RET	1.1e-10	8	9	2.9e-08	1	0.061	1	0.001	0.00048	global-SL%RET	CASSLFRETQYF	TCRBV12-03	TCRBJ02-05	NA	03/0908:HD8_Tscm	1	-	-	-	-	-	-	-	-	-	-	-
14	SL%RET	1.1e-10	8	9	2.9e-08	1	0.061	1	0.001	0.00048	global-SL%RET	CASSLGRETQYF	TCRBV05-06	TCRBJ02-05	NA	03/0906:HD6_Tscm	1	-	-	-	-	-	-	-	-	-	-	-
14	SL%RET	1.1e-10	8	9	2.9e-08	1	0.061	1	0.001	0.00048	global-SL%RET	CASSLGRETQYF	TCRBV06-05	TCRBJ02-05	NA	03/0906:HD6_Tscm	1	-	-	-	-	-	-	-	-	-	-	-
14	SL%RET	1.1e-10	8	9	2.9e-08	1	0.061	1	0.001	0.00048	global-SL%RET	CASSLGRETQYF	TCRBV18-01	TCRBJ02-05	NA	03/0906:HD6_Tscm	1	-	-	-	-	-	-	-	-	-	-	-
14	SL%RET	1.1e-10	8	9	2.9e-08	1	0.061	1	0.001	0.00048	global-SL%RET	CASSLGRETQYF	TCRBV07-02	TCRBJ02-05	NA	03/0906:HD6_Tscm	1	-	-	-	-	-	-	-	-	-	-	-
14	SL%RET	1.1e-10	8	9	2.9e-08	1	0.061	1	0.001	0.00048	global-SL%RET	CASSLGRETQYF	TCRBV02-01	TCRBJ02-05	NA	03/0906:HD6_Tscm	1	-	-	-	-	-	-	-	-	-	-	-
14	SL%RET	1.1e-10	8	9	2.9e-08	1	0.061	1	0.001	0.00048	global-SL%RET	CASSLTRETQYF	TCRBV07-02	TCRBJ02-05	NA	03/0903:HD3_Tscm	1	-	-	-	-	-	-	-	-	-	-	-
14	SL%RET	1.1e-10	8	9	2.9e-08	1	0.061	1	0.001	0.00048	global-SL%RET	CASSLTRETQYF	TCRBV28-01	TCRBJ02-05	NA	03/0903:HD3_Tscm	1	-	-	-	-	-	-	-	-	-	-	-
15	SL%DT	5.1e-10	12	10	1.3e-09	1	0.004	1	0.001	0.00031	global-SL%DT	CASSLQDTQYF	TCRBV05-06	TCRBJ02-03	NA	03/0902:HD2_Tscm	1	-	-	-	-	-	-	-	-	-	-	-
15	SL%DT	5.1e-10	12	10	1.3e-09	1	0.004	1	0.001	0.00031	global-SL%DT	CASSLQDTQYF	TCRBV07-06	TCRBJ02-03	NA	03/0902:HD2_Tscm	1	-	-	-	-	-	-	-	-	-	-	-
15	SL%DT	5.1e-10	12	10	1.3e-09	1	0.004	1	0.001	0.00031	global-SL%DT	CASSLEDTQYF	TCRBV07-06	TCRBJ02-03	NA	03/0906:HD6_Tscm	1	-	-	-	-	-	-	-	-	-	-	-
15	SL%DT	5.1e-10	12	10	1.3e-09	1	0.004	1	0.001	0.00031	global-SL%DT	CASSLEDTQYF	TCRBV19-01	TCRBJ02-03	NA	03/0906:HD6_Tscm	1	-	-	-	-	-	-	-	-	-	-	-
15	SL%DT	5.1e-10	12	10	1.3e-09	1	0.004	1	0.001	0.00031	global-SL%DT	CASSLEDTQYF	TCRBV05-01	TCRBJ02-03	NA	03/0906:HD6_Tscm	1	-	-	-	-	-	-	-	-	-	-	-
15	SL%DT	5.1e-10	12	10	1.3e-09	1	0.004	1	0.001	0.00031	global-SL%DT	CASSLEDTQYF	TCRBV07-09	TCRBJ02-03	NA	03/0906:HD6_Tscm	1	-	-	-	-	-	-	-	-	-	-	-
15	SL%DT	5.1e-10	12	10	1.3e-09	1	0.004	1	0.001	0.00031	global-SL%DT	CASSLEDTQYF	TCRBV07-09	TCRBJ02-03	NA	03/0911:T1D3_Tscm	1	-	-	-	-	-	-	-	-	-	-	-
15	SL%DT	5.1e-10	12	10	1.3e-09	1	0.004	1	0.001	0.00031	global-SL%DT	CASSLEDTQYF	TCRBV07-02	TCRBJ02-03	NA	03/0911:T1D3_Tscm	1	-	-	-	-	-	-	-	-	-	-	-
15	SL%DT	5.1e-10	12	10	1.3e-09	1	0.004	1	0.001	0.00031	global-SL%DT	CASSLEDTQYF	TCRBV07-03	TCRBJ02-03	NA	03/0911:T1D3_Tscm	1	-	-	-	-	-	-	-	-	-	-	-
15	SL%DT	5.1e-10	12	10	1.3e-09	1	0.004	1	0.001	0.00031	global-SL%DT	CASSLEDTQYF	TCRBV07-09	TCRBJ02-03	NA	03/0913:T1D5_Tscm	1	-	-	-	-	-	-	-	-	-	-	-
15	SL%DT	5.1e-10	12	10	1.3e-09	1	0.004	1	0.001	0.00031	global-SL%DT	CASSLEDTQYF	TCRBV05-01	TCRBJ02-03	NA	03/0913:T1D5_Tscm	1	-	-	-	-	-	-	-	-	-	-	-
15	SL%DT	5.1e-10	12	10	1.3e-09	1	0.004	1	0.001	0.00031	global-SL%DT	CASSLEDTQYF	TCRBV07-09	TCRBJ02-03	NA	03/0915:T1D7_Tscm	1	-	-	-	-	-	-	-	-	-	-	-
15	SL%DT	5.1e-10	12	10	1.3e-09	1	0.004	1	0.001	0.00031	global-SL%DT	CASSLRDTQYF	TCRBV06-05	TCRBJ02-03	NA	03/0901:HD1_Tscm	1	-	-	-	-	-	-	-	-	-	-	-
15	SL%DT	5.1e-10	12	10	1.3e-09	1	0.004	1	0.001	0.00031	global-SL%DT	CASSLRDTQYF	TCRBV05-08	TCRBJ02-03	NA	03/0901:HD1_Tscm	1	-	-	-	-	-	-	-	-	-	-	-
15	SL%DT	5.1e-10	12	10	1.3e-09	1	0.004	1	0.001	0.00031	global-SL%DT	CASSLRDTQYF	TCRBV06-02	TCRBJ02-03	NA	03/0901:HD1_Tscm	1	-	-	-	-	-	-	-	-	-	-	-
15	SL%DT	5.1e-10	12	10	1.3e-09	1	0.004	1	0.001	0.00031	global-SL%DT	CASSLRDTQYF	TCRBV05-08	TCRBJ02-03	NA	03/0915:T1D7_Tscm	1	-	-	-	-	-	-	-	-	-	-	-
15	SL%DT	5.1e-10	12	10	1.3e-09	1	0.004	1	0.001	0.00031	global-SL%DT	CASSLRDTQYF	TCRBV28-01	TCRBJ02-03	NA	03/0915:T1D7_Tscm	1	-	-	-	-	-	-	-	-	-	-	-
15	SL%DT	5.1e-10	12	10	1.3e-09	1	0.004	1	0.001	0.00031	global-SL%DT	CASSLRDTQYF	TCRBV12-03	TCRBJ02-03	NA	03/0915:T1D7_Tscm	1	-	-	-	-	-	-	-	-	-	-	-
15	SL%DT	5.1e-10	12	10	1.3e-09	1	0.004	1	0.001	0.00031	global-SL%DT	CASSLRDTQYF	TCRBV07-09	TCRBJ02-03	NA	03/0915:T1D7_Tscm	1	-	-	-	-	-	-	-	-	-	-	-
15	SL%DT	5.1e-10	12	10	1.3e-09	1	0.004	1	0.001	0.00031	global-SL%DT	CASSLADTQYF	TCRBV11-01	TCRBJ02-03	NA	03/0902:HD2_Tscm	1	-	-	-	-	-	-	-	-	-	-	-
15	SL%DT	5.1e-10	12	10	1.3e-09	1	0.004	1	0.001	0.00031	global-SL%DT	CASSLADTQYF	TCRBV05-01	TCRBJ02-03	NA	03/0902:HD2_Tscm	1	-	-	-	-	-	-	-	-	-	-	-
15	SL%DT	5.1e-10	12	10	1.3e-09	1	0.004	1	0.001	0.00031	global-SL%DT	CASSLADTQYF	TCRBV07-02	TCRBJ02-03	NA	03/0902:HD2_Tscm	1	-	-	-	-	-	-	-	-	-	-	-
15	SL%DT	5.1e-10	12	10	1.3e-09	1	0.004	1	0.001	0.00031	global-SL%DT	CASSLADTQYF	TCRBV07-09	TCRBJ02-03	NA	03/0902:HD2_Tscm	1	-	-	-	-	-	-	-	-	-	-	-
15	SL%DT	5.1e-10	12	10	1.3e-09	1	0.004	1	0.001	0.00031	global-SL%DT	CASSLADTQYF	TCRBV11-02	TCRBJ02-03	NA	03/0902:HD2_Tscm	1	-	-	-	-	-	-	-	-	-	-	-
15	SL%DT	5.1e-10	12	10	1.3e-09	1	0.004	1	0.001	0.00031	global-SL%DT	CASSLADTQYF	TCRBV11-02	TCRBJ02-03	NA	03/0903:HD3_Tscm	1	-	-	-	-	-	-	-	-	-	-	-
15	SL%DT	5.1e-10	12	10	1.3e-09	1	0.004	1	0.001	0.00031	global-SL%DT	CASSLADTQYF	TCRBV05-01	TCRBJ02-03	NA	03/0903:HD3_Tscm	1	-	-	-	-	-	-	-	-	-	-	-
15	SL%DT	5.1e-10	12	10	1.3e-09	1	0.004	1	0.001	0.00031	global-SL%DT	CASSLADTQYF	TCRBV28-01	TCRBJ02-03	NA	03/0903:HD3_Tscm	1	-	-	-	-	-	-	-	-	-	-	-
15	SL%DT	5.1e-10	12	10	1.3e-09	1	0.004	1	0.001	0.00031	global-SL%DT	CASSLADTQYF	TCRBV27-01	TCRBJ02-03	NA	03/0903:HD3_Tscm	1	-	-	-	-	-	-	-	-	-	-	-
15	SL%DT	5.1e-10	12	10	1.3e-09	1	0.004	1	0.001	0.00031	global-SL%DT	CASSLADTQYF	TCRBV07-02	TCRBJ02-03	NA	03/0903:HD3_Tscm	1	-	-	-	-	-	-	-	-	-	-	-
15	SL%DT	5.1e-10	12	10	1.3e-09	1	0.004	1	0.001	0.00031	global-SL%DT	CASSLADTQYF	TCRBV12-03	TCRBJ02-03	NA	03/0906:HD6_Tscm	1	-	-	-	-	-	-	-	-	-	-	-
15	SL%DT	5.1e-10	12	10	1.3e-09	1	0.004	1	0.001	0.00031	global-SL%DT	CASSLADTQYF	TCRBV06-01	TCRBJ02-03	NA	03/0906:HD6_Tscm	1	-	-	-	-	-	-	-	-	-	-	-
15	SL%DT	5.1e-10	12	10	1.3e-09	1	0.004	1	0.001	0.00031	global-SL%DT	CASSLADTQYF	TCRBV02-01	TCRBJ02-03	NA	03/0906:HD6_Tscm	1	-	-	-	-	-	-	-	-	-	-	-
15	SL%DT	5.1e-10	12	10	1.3e-09	1	0.004	1	0.001	0.00031	global-SL%DT	CASSLADTQYF	TCRBV05-04	TCRBJ02-03	NA	03/0906:HD6_Tscm	1	-	-	-	-	-	-	-	-	-	-	-
15	SL%DT	5.1e-10	12	10	1.3e-09	1	0.004	1	0.001	0.00031	global-SL%DT	CASSLADTQYF	TCRBV07-09	TCRBJ02-03	NA	03/0906:HD6_Tscm	1	-	-	-	-	-	-	-	-	-	-	-
15	SL%DT	5.1e-10	12	10	1.3e-09	1	0.004	1	0.001	0.00031	global-SL%DT	CASSLADTQYF	TCRBV05-01	TCRBJ02-03	NA	03/0906:HD6_Tscm	1	-	-	-	-	-	-	-	-	-	-	-
15	SL%DT	5.1e-10	12	10	1.3e-09	1	0.004	1	0.001	0.00031	global-SL%DT	CASSLADTQYF	TCRBV05-06	TCRBJ02-03	NA	03/0906:HD6_Tscm	1	-	-	-	-	-	-	-	-	-	-	-
15	SL%DT	5.1e-10	12	10	1.3e-09	1	0.004	1	0.001	0.00031	global-SL%DT	CASSLADTQYF	TCRBV19-01	TCRBJ02-03	NA	03/0906:HD6_Tscm	1	-	-	-	-	-	-	-	-	-	-	-
15	SL%DT	5.1e-10	12	10	1.3e-09	1	0.004	1	0.001	0.00031	global-SL%DT	CASSLADTQYF	TCRBV07-02	TCRBJ02-03	NA	03/0906:HD6_Tscm	1	-	-	-	-	-	-	-	-	-	-	-
15	SL%DT	5.1e-10	12	10	1.3e-09	1	0.004	1	0.001	0.00031	global-SL%DT	CASSLADTQYF	TCRBV11-03	TCRBJ02-03	NA	03/0907:HD7_Tscm	1	-	-	-	-	-	-	-	-	-	-	-
15	SL%DT	5.1e-10	12	10	1.3e-09	1	0.004	1	0.001	0.00031	global-SL%DT	CASSLADTQYF	TCRBV11-02	TCRBJ02-03	NA	03/0907:HD7_Tscm	1	-	-	-	-	-	-	-	-	-	-	-
15	SL%DT	5.1e-10	12	10	1.3e-09	1	0.004	1	0.001	0.00031	global-SL%DT	CASSLADTQYF	TCRBV28-01	TCRBJ02-03	NA	03/0907:HD7_Tscm	1	-	-	-	-	-	-	-	-	-	-	-
15	SL%DT	5.1e-10	12	10	1.3e-09	1	0.004	1	0.001	0.00031	global-SL%DT	CASSLADTQYF	TCRBV07-02	TCRBJ02-03	NA	03/0907:HD7_Tscm	1	-	-	-	-	-	-	-	-	-	-	-
15	SL%DT	5.1e-10	12	10	1.3e-09	1	0.004	1	0.001	0.00031	global-SL%DT	CASSLADTQYF	TCRBV12-03	TCRBJ02-03	NA	03/0907:HD7_Tscm	1	-	-	-	-	-	-	-	-	-	-	-
15	SL%DT	5.1e-10	12	10	1.3e-09	1	0.004	1	0.001	0.00031	global-SL%DT	CASSLADTQYF	TCRBV12-03	TCRBJ02-03	NA	03/0910:T1D2_Tscm	1	-	-	-	-	-	-	-	-	-	-	-
15	SL%DT	5.1e-10	12	10	1.3e-09	1	0.004	1	0.001	0.00031	global-SL%DT	CASSLADTQYF	TCRBV11-03	TCRBJ02-03	NA	03/0910:T1D2_Tscm	1	-	-	-	-	-	-	-	-	-	-	-
15	SL%DT	5.1e-10	12	10	1.3e-09	1	0.004	1	0.001	0.00031	global-SL%DT	CASSLADTQYF	TCRBV07-02	TCRBJ02-03	NA	03/0910:T1D2_Tscm	1	-	-	-	-	-	-	-	-	-	-	-
15	SL%DT	5.1e-10	12	10	1.3e-09	1	0.004	1	0.001	0.00031	global-SL%DT	CASSLADTQYF	TCRBV11-02	TCRBJ02-03	NA	03/0910:T1D2_Tscm	1	-	-	-	-	-	-	-	-	-	-	-
15	SL%DT	5.1e-10	12	10	1.3e-09	1	0.004	1	0.001	0.00031	global-SL%DT	CASSLADTQYF	TCRBV05-01	TCRBJ02-03	NA	03/0915:T1D7_Tscm	1	-	-	-	-	-	-	-	-	-	-	-
15	SL%DT	5.1e-10	12	10	1.3e-09	1	0.004	1	0.001	0.00031	global-SL%DT	CASSLADTQYF	TCRBV07-09	TCRBJ02-03	NA	03/0915:T1D7_Tscm	1	-	-	-	-	-	-	-	-	-	-	-
15	SL%DT	5.1e-10	12	10	1.3e-09	1	0.004	1	0.001	0.00031	global-SL%DT	CASSLADTQYF	TCRBV12-03	TCRBJ02-03	NA	03/0915:T1D7_Tscm	1	-	-	-	-	-	-	-	-	-	-	-
15	SL%DT	5.1e-10	12	10	1.3e-09	1	0.004	1	0.001	0.00031	global-SL%DT	CASSLGDTQYF	TCRBV05-06	TCRBJ02-03	NA	03/0902:HD2_Tscm	1	-	-	-	-	-	-	-	-	-	-	-
15	SL%DT	5.1e-10	12	10	1.3e-09	1	0.004	1	0.001	0.00031	global-SL%DT	CASSLGDTQYF	TCRBV09-01	TCRBJ02-03	NA	03/0902:HD2_Tscm	1	-	-	-	-	-	-	-	-	-	-	-
15	SL%DT	5.1e-10	12	10	1.3e-09	1	0.004	1	0.001	0.00031	global-SL%DT	CASSLGDTQYF	TCRBV18-01	TCRBJ02-03	NA	03/0902:HD2_Tscm	1	-	-	-	-	-	-	-	-	-	-	-
15	SL%DT	5.1e-10	12	10	1.3e-09	1	0.004	1	0.001	0.00031	global-SL%DT	CASSLGDTQYF	TCRBV05-01	TCRBJ02-03	NA	03/0902:HD2_Tscm	1	-	-	-	-	-	-	-	-	-	-	-
15	SL%DT	5.1e-10	12	10	1.3e-09	1	0.004	1	0.001	0.00031	global-SL%DT	CASSLGDTQYF	TCRBV07-02	TCRBJ02-03	NA	03/0902:HD2_Tscm	1	-	-	-	-	-	-	-	-	-	-	-
15	SL%DT	5.1e-10	12	10	1.3e-09	1	0.004	1	0.001	0.00031	global-SL%DT	CASSLGDTQYF	TCRBV07-09	TCRBJ02-03	NA	03/0902:HD2_Tscm	1	-	-	-	-	-	-	-	-	-	-	-
15	SL%DT	5.1e-10	12	10	1.3e-09	1	0.004	1	0.001	0.00031	global-SL%DT	CASSLGDTQYF	TCRBV07-09	TCRBJ02-03	NA	03/0905:HD5_Tscm	1	-	-	-	-	-	-	-	-	-	-	-
15	SL%DT	5.1e-10	12	10	1.3e-09	1	0.004	1	0.001	0.00031	global-SL%DT	CASSLGDTQYF	TCRBV11-02	TCRBJ02-03	NA	03/0906:HD6_Tscm	1	-	-	-	-	-	-	-	-	-	-	-
15	SL%DT	5.1e-10	12	10	1.3e-09	1	0.004	1	0.001	0.00031	global-SL%DT	CASSLGDTQYF	TCRBV07-09	TCRBJ02-03	NA	03/0906:HD6_Tscm	1	-	-	-	-	-	-	-	-	-	-	-
15	SL%DT	5.1e-10	12	10	1.3e-09	1	0.004	1	0.001	0.00031	global-SL%DT	CASSLGDTQYF	TCRBV05-01	TCRBJ02-03	NA	03/0906:HD6_Tscm	1	-	-	-	-	-	-	-	-	-	-	-
15	SL%DT	5.1e-10	12	10	1.3e-09	1	0.004	1	0.001	0.00031	global-SL%DT	CASSLGDTQYF	TCRBV07-02	TCRBJ02-03	NA	03/0906:HD6_Tscm	1	-	-	-	-	-	-	-	-	-	-	-
15	SL%DT	5.1e-10	12	10	1.3e-09	1	0.004	1	0.001	0.00031	global-SL%DT	CASSLGDTQYF	TCRBV05-06	TCRBJ02-03	NA	03/0909:T1D1_Tscm	1	-	-	-	-	-	-	-	-	-	-	-
15	SL%DT	5.1e-10	12	10	1.3e-09	1	0.004	1	0.001	0.00031	global-SL%DT	CASSLGDTQYF	TCRBV05-01	TCRBJ02-03	NA	03/0909:T1D1_Tscm	1	-	-	-	-	-	-	-	-	-	-	-
15	SL%DT	5.1e-10	12	10	1.3e-09	1	0.004	1	0.001	0.00031	global-SL%DT	CASSLGDTQYF	TCRBV07-02	TCRBJ02-03	NA	03/0909:T1D1_Tscm	1	-	-	-	-	-	-	-	-	-	-	-
15	SL%DT	5.1e-10	12	10	1.3e-09	1	0.004	1	0.001	0.00031	global-SL%DT	CASSLGDTQYF	TCRBV12-03	TCRBJ02-03	NA	03/0915:T1D7_Tscm	1	-	-	-	-	-	-	-	-	-	-	-
15	SL%DT	5.1e-10	12	10	1.3e-09	1	0.004	1	0.001	0.00031	global-SL%DT	CASSLGDTQYF	TCRBV07-02	TCRBJ02-03	NA	03/0915:T1D7_Tscm	1	-	-	-	-	-	-	-	-	-	-	-
15	SL%DT	5.1e-10	12	10	1.3e-09	1	0.004	1	0.001	0.00031	global-SL%DT	CASSLGDTQYF	TCRBV07-09	TCRBJ02-03	NA	03/0915:T1D7_Tscm	1	-	-	-	-	-	-	-	-	-	-	-
15	SL%DT	5.1e-10	12	10	1.3e-09	1	0.004	1	0.001	0.00031	global-SL%DT	CASSLTDTQYF	TCRBV11-02	TCRBJ02-03	NA	03/0902:HD2_Tscm	1	-	-	-	-	-	-	-	-	-	-	-
15	SL%DT	5.1e-10	12	10	1.3e-09	1	0.004	1	0.001	0.00031	global-SL%DT	CASSLTDTQYF	TCRBV27-01	TCRBJ02-03	NA	03/0902:HD2_Tscm	1	-	-	-	-	-	-	-	-	-	-	-
15	SL%DT	5.1e-10	12	10	1.3e-09	1	0.004	1	0.001	0.00031	global-SL%DT	CASSLTDTQYF	TCRBV05-08	TCRBJ02-03	NA	03/0902:HD2_Tscm	1	-	-	-	-	-	-	-	-	-	-	-
15	SL%DT	5.1e-10	12	10	1.3e-09	1	0.004	1	0.001	0.00031	global-SL%DT	CASSLTDTQYF	TCRBV12-03	TCRBJ02-03	NA	03/0902:HD2_Tscm	1	-	-	-	-	-	-	-	-	-	-	-
15	SL%DT	5.1e-10	12	10	1.3e-09	1	0.004	1	0.001	0.00031	global-SL%DT	CASSLTDTQYF	TCRBV18-01	TCRBJ02-03	NA	03/0902:HD2_Tscm	1	-	-	-	-	-	-	-	-	-	-	-
15	SL%DT	5.1e-10	12	10	1.3e-09	1	0.004	1	0.001	0.00031	global-SL%DT	CASSLTDTQYF	TCRBV02-01	TCRBJ02-03	NA	03/0902:HD2_Tscm	1	-	-	-	-	-	-	-	-	-	-	-
15	SL%DT	5.1e-10	12	10	1.3e-09	1	0.004	1	0.001	0.00031	global-SL%DT	CASSLTDTQYF	TCRBV05-01	TCRBJ02-03	NA	03/0902:HD2_Tscm	1	-	-	-	-	-	-	-	-	-	-	-
15	SL%DT	5.1e-10	12	10	1.3e-09	1	0.004	1	0.001	0.00031	global-SL%DT	CASSLTDTQYF	TCRBV07-03	TCRBJ02-03	NA	03/0903:HD3_Tscm	1	-	-	-	-	-	-	-	-	-	-	-
15	SL%DT	5.1e-10	12	10	1.3e-09	1	0.004	1	0.001	0.00031	global-SL%DT	CASSLTDTQYF	TCRBV07-09	TCRBJ02-03	NA	03/0903:HD3_Tscm	1	-	-	-	-	-	-	-	-	-	-	-
15	SL%DT	5.1e-10	12	10	1.3e-09	1	0.004	1	0.001	0.00031	global-SL%DT	CASSLTDTQYF	TCRBV07-02	TCRBJ02-03	NA	03/0903:HD3_Tscm	1	-	-	-	-	-	-	-	-	-	-	-
15	SL%DT	5.1e-10	12	10	1.3e-09	1	0.004	1	0.001	0.00031	global-SL%DT	CASSLTDTQYF	TCRBV07-09	TCRBJ02-03	NA	03/0906:HD6_Tscm	1	-	-	-	-	-	-	-	-	-	-	-
15	SL%DT	5.1e-10	12	10	1.3e-09	1	0.004	1	0.001	0.00031	global-SL%DT	CASSLTDTQYF	TCRBV05-01	TCRBJ02-03	NA	03/0906:HD6_Tscm	1	-	-	-	-	-	-	-	-	-	-	-
15	SL%DT	5.1e-10	12	10	1.3e-09	1	0.004	1	0.001	0.00031	global-SL%DT	CASSLTDTQYF	TCRBV07-06	TCRBJ02-03	NA	03/0906:HD6_Tscm	1	-	-	-	-	-	-	-	-	-	-	-
15	SL%DT	5.1e-10	12	10	1.3e-09	1	0.004	1	0.001	0.00031	global-SL%DT	CASSLTDTQYF	TCRBV18-01	TCRBJ02-03	NA	03/0906:HD6_Tscm	1	-	-	-	-	-	-	-	-	-	-	-
15	SL%DT	5.1e-10	12	10	1.3e-09	1	0.004	1	0.001	0.00031	global-SL%DT	CASSLTDTQYF	TCRBV02-01	TCRBJ02-03	NA	03/0906:HD6_Tscm	1	-	-	-	-	-	-	-	-	-	-	-
15	SL%DT	5.1e-10	12	10	1.3e-09	1	0.004	1	0.001	0.00031	global-SL%DT	CASSLTDTQYF	TCRBV28-01	TCRBJ02-03	NA	03/0906:HD6_Tscm	1	-	-	-	-	-	-	-	-	-	-	-
15	SL%DT	5.1e-10	12	10	1.3e-09	1	0.004	1	0.001	0.00031	global-SL%DT	CASSLTDTQYF	TCRBV12-03	TCRBJ02-03	NA	03/0906:HD6_Tscm	1	-	-	-	-	-	-	-	-	-	-	-
15	SL%DT	5.1e-10	12	10	1.3e-09	1	0.004	1	0.001	0.00031	global-SL%DT	CASSLTDTQYF	TCRBV03-01	TCRBJ02-03	NA	03/0914:T1D6_Tscm	1	-	-	-	-	-	-	-	-	-	-	-
15	SL%DT	5.1e-10	12	10	1.3e-09	1	0.004	1	0.001	0.00031	global-SL%DT	CASSLTDTQYF	TCRBV12-03	TCRBJ02-03	NA	03/0914:T1D6_Tscm	1	-	-	-	-	-	-	-	-	-	-	-
15	SL%DT	5.1e-10	12	10	1.3e-09	1	0.004	1	0.001	0.00031	global-SL%DT	CASSLTDTQYF	TCRBV28-01	TCRBJ02-03	NA	03/0915:T1D7_Tscm	1	-	-	-	-	-	-	-	-	-	-	-
15	SL%DT	5.1e-10	12	10	1.3e-09	1	0.004	1	0.001	0.00031	global-SL%DT	CASSLTDTQYF	TCRBV06-06	TCRBJ02-03	NA	03/0915:T1D7_Tscm	1	-	-	-	-	-	-	-	-	-	-	-
15	SL%DT	5.1e-10	12	10	1.3e-09	1	0.004	1	0.001	0.00031	global-SL%DT	CASSLTDTQYF	TCRBV27-01	TCRBJ02-03	NA	03/0915:T1D7_Tscm	1	-	-	-	-	-	-	-	-	-	-	-
15	SL%DT	5.1e-10	12	10	1.3e-09	1	0.004	1	0.001	0.00031	global-SL%DT	CASSLTDTQYF	TCRBV09-01	TCRBJ02-03	NA	03/0915:T1D7_Tscm	1	-	-	-	-	-	-	-	-	-	-	-
15	SL%DT	5.1e-10	12	10	1.3e-09	1	0.004	1	0.001	0.00031	global-SL%DT	CASSLTDTQYF	TCRBV03-01	TCRBJ02-03	NA	03/0915:T1D7_Tscm	1	-	-	-	-	-	-	-	-	-	-	-
15	SL%DT	5.1e-10	12	10	1.3e-09	1	0.004	1	0.001	0.00031	global-SL%DT	CASSLTDTQYF	TCRBV12-03	TCRBJ02-03	NA	03/0915:T1D7_Tscm	1	-	-	-	-	-	-	-	-	-	-	-
15	SL%DT	5.1e-10	12	10	1.3e-09	1	0.004	1	0.001	0.00031	global-SL%DT	CASSLTDTQYF	TCRBV18-01	TCRBJ02-03	NA	03/0915:T1D7_Tscm	1	-	-	-	-	-	-	-	-	-	-	-
15	SL%DT	5.1e-10	12	10	1.3e-09	1	0.004	1	0.001	0.00031	global-SL%DT	CASSLTDTQYF	TCRBV05-01	TCRBJ02-03	NA	03/0915:T1D7_Tscm	1	-	-	-	-	-	-	-	-	-	-	-
15	SL%DT	5.1e-10	12	10	1.3e-09	1	0.004	1	0.001	0.00031	global-SL%DT	CASSLTDTQYF	TCRBV07-09	TCRBJ02-03	NA	03/0915:T1D7_Tscm	1	-	-	-	-	-	-	-	-	-	-	-
15	SL%DT	5.1e-10	12	10	1.3e-09	1	0.004	1	0.001	0.00031	global-SL%DT	CSVSLTDTQYF	TCRBV29-01	TCRBJ02-03	NA	03/0906:HD6_Tscm	1	-	-	-	-	-	-	-	-	-	-	-
15	SL%DT	5.1e-10	12	10	1.3e-09	1	0.004	1	0.001	0.00031	global-SL%DT	CASSLVDTQYF	TCRBV11-02	TCRBJ02-03	NA	03/0905:HD5_Tscm	1	-	-	-	-	-	-	-	-	-	-	-
15	SL%DT	5.1e-10	12	10	1.3e-09	1	0.004	1	0.001	0.00031	global-SL%DT	CASSLVDTQYF	TCRBV05-06	TCRBJ02-03	NA	03/0906:HD6_Tscm	1	-	-	-	-	-	-	-	-	-	-	-
15	SL%DT	5.1e-10	12	10	1.3e-09	1	0.004	1	0.001	0.00031	global-SL%DT	CASSLVDTQYF	TCRBV07-09	TCRBJ02-03	NA	03/0906:HD6_Tscm	1	-	-	-	-	-	-	-	-	-	-	-
15	SL%DT	5.1e-10	12	10	1.3e-09	1	0.004	1	0.001	0.00031	global-SL%DT	CASSLVDTQYF	TCRBV05-05	TCRBJ02-03	NA	03/0906:HD6_Tscm	1	-	-	-	-	-	-	-	-	-	-	-
15	SL%DT	5.1e-10	12	10	1.3e-09	1	0.004	1	0.001	0.00031	global-SL%DT	CASSLVDTQYF	TCRBV12-03	TCRBJ02-03	NA	03/0906:HD6_Tscm	1	-	-	-	-	-	-	-	-	-	-	-
15	SL%DT	5.1e-10	12	10	1.3e-09	1	0.004	1	0.001	0.00031	global-SL%DT	CASSLVDTQYF	TCRBV11-02	TCRBJ02-03	NA	03/0907:HD7_Tscm	1	-	-	-	-	-	-	-	-	-	-	-
15	SL%DT	5.1e-10	12	10	1.3e-09	1	0.004	1	0.001	0.00031	global-SL%DT	CASSLVDTQYF	TCRBV05-06	TCRBJ02-03	NA	03/0907:HD7_Tscm	1	-	-	-	-	-	-	-	-	-	-	-
15	SL%DT	5.1e-10	12	10	1.3e-09	1	0.004	1	0.001	0.00031	global-SL%DT	CASSLVDTQYF	TCRBV07-09	TCRBJ02-03	NA	03/0907:HD7_Tscm	1	-	-	-	-	-	-	-	-	-	-	-
15	SL%DT	5.1e-10	12	10	1.3e-09	1	0.004	1	0.001	0.00031	global-SL%DT	CASSLVDTQYF	TCRBV05-06	TCRBJ02-03	NA	03/0910:T1D2_Tscm	1	-	-	-	-	-	-	-	-	-	-	-
15	SL%DT	5.1e-10	12	10	1.3e-09	1	0.004	1	0.001	0.00031	global-SL%DT	CASSLVDTQYF	TCRBV07-02	TCRBJ02-03	NA	03/0910:T1D2_Tscm	1	-	-	-	-	-	-	-	-	-	-	-
15	SL%DT	5.1e-10	12	10	1.3e-09	1	0.004	1	0.001	0.00031	global-SL%DT	CASSLVDTQYF	TCRBV05-04	TCRBJ02-03	NA	03/0910:T1D2_Tscm	1	-	-	-	-	-	-	-	-	-	-	-
15	SL%DT	5.1e-10	12	10	1.3e-09	1	0.004	1	0.001	0.00031	global-SL%DT	CASSLVDTQYF	TCRBV05-01	TCRBJ02-03	NA	03/0915:T1D7_Tscm	1	-	-	-	-	-	-	-	-	-	-	-
15	SL%DT	5.1e-10	12	10	1.3e-09	1	0.004	1	0.001	0.00031	global-SL%DT	CASSLVDTQYF	TCRBV07-02	TCRBJ02-03	NA	03/0915:T1D7_Tscm	1	-	-	-	-	-	-	-	-	-	-	-
15	SL%DT	5.1e-10	12	10	1.3e-09	1	0.004	1	0.001	0.00031	global-SL%DT	CASSLVDTQYF	TCRBV11-01	TCRBJ02-03	NA	03/0915:T1D7_Tscm	1	-	-	-	-	-	-	-	-	-	-	-
15	SL%DT	5.1e-10	12	10	1.3e-09	1	0.004	1	0.001	0.00031	global-SL%DT	CASSLVDTQYF	TCRBV28-01	TCRBJ02-03	NA	03/0915:T1D7_Tscm	1	-	-	-	-	-	-	-	-	-	-	-
15	SL%DT	5.1e-10	12	10	1.3e-09	1	0.004	1	0.001	0.00031	global-SL%DT	CASSLKDTQYF	TCRBV11-03	TCRBJ02-03	NA	03/0907:HD7_Tscm	1	-	-	-	-	-	-	-	-	-	-	-
15	SL%DT	5.1e-10	12	10	1.3e-09	1	0.004	1	0.001	0.00031	global-SL%DT	CASSLKDTQYF	TCRBV05-04	TCRBJ02-03	NA	03/0907:HD7_Tscm	1	-	-	-	-	-	-	-	-	-	-	-
15	SL%DT	5.1e-10	12	10	1.3e-09	1	0.004	1	0.001	0.00031	global-SL%DT	CASSLKDTQYF	TCRBV05-06	TCRBJ02-03	NA	03/0907:HD7_Tscm	1	-	-	-	-	-	-	-	-	-	-	-
15	SL%DT	5.1e-10	12	10	1.3e-09	1	0.004	1	0.001	0.00031	global-SL%DT	CASSLKDTQYF	TCRBV12-03	TCRBJ02-03	NA	03/0907:HD7_Tscm	1	-	-	-	-	-	-	-	-	-	-	-
15	SL%DT	5.1e-10	12	10	1.3e-09	1	0.004	1	0.001	0.00031	global-SL%DT	CASSLSDTQYF	TCRBV11-03	TCRBJ02-03	NA	03/0902:HD2_Tscm	1	-	-	-	-	-	-	-	-	-	-	-
15	SL%DT	5.1e-10	12	10	1.3e-09	1	0.004	1	0.001	0.00031	global-SL%DT	CASSLSDTQYF	TCRBV07-03	TCRBJ02-03	NA	03/0902:HD2_Tscm	1	-	-	-	-	-	-	-	-	-	-	-
15	SL%DT	5.1e-10	12	10	1.3e-09	1	0.004	1	0.001	0.00031	global-SL%DT	CASSLSDTQYF	TCRBV05-01	TCRBJ02-03	NA	03/0902:HD2_Tscm	1	-	-	-	-	-	-	-	-	-	-	-
15	SL%DT	5.1e-10	12	10	1.3e-09	1	0.004	1	0.001	0.00031	global-SL%DT	CASSLSDTQYF	TCRBV27-01	TCRBJ02-03	NA	03/0902:HD2_Tscm	1	-	-	-	-	-	-	-	-	-	-	-
15	SL%DT	5.1e-10	12	10	1.3e-09	1	0.004	1	0.001	0.00031	global-SL%DT	CASSLSDTQYF	TCRBV07-02	TCRBJ02-03	NA	03/0902:HD2_Tscm	1	-	-	-	-	-	-	-	-	-	-	-
15	SL%DT	5.1e-10	12	10	1.3e-09	1	0.004	1	0.001	0.00031	global-SL%DT	CASSLSDTQYF	TCRBV12-03	TCRBJ02-03	NA	03/0902:HD2_Tscm	1	-	-	-	-	-	-	-	-	-	-	-
15	SL%DT	5.1e-10	12	10	1.3e-09	1	0.004	1	0.001	0.00031	global-SL%DT	CASSLSDTQYF	TCRBV05-04	TCRBJ02-03	NA	03/0903:HD3_Tscm	1	-	-	-	-	-	-	-	-	-	-	-
15	SL%DT	5.1e-10	12	10	1.3e-09	1	0.004	1	0.001	0.00031	global-SL%DT	CASSLSDTQYF	TCRBV05-06	TCRBJ02-03	NA	03/0906:HD6_Tscm	1	-	-	-	-	-	-	-	-	-	-	-
15	SL%DT	5.1e-10	12	10	1.3e-09	1	0.004	1	0.001	0.00031	global-SL%DT	CASSLSDTQYF	TCRBV07-02	TCRBJ02-03	NA	03/0906:HD6_Tscm	1	-	-	-	-	-	-	-	-	-	-	-
15	SL%DT	5.1e-10	12	10	1.3e-09	1	0.004	1	0.001	0.00031	global-SL%DT	CASSLSDTQYF	TCRBV12-03	TCRBJ02-03	NA	03/0906:HD6_Tscm	1	-	-	-	-	-	-	-	-	-	-	-
15	SL%DT	5.1e-10	12	10	1.3e-09	1	0.004	1	0.001	0.00031	global-SL%DT	CASSLSDTQYF	TCRBV05-04	TCRBJ02-03	NA	03/0911:T1D3_Tscm	1	-	-	-	-	-	-	-	-	-	-	-
15	SL%DT	5.1e-10	12	10	1.3e-09	1	0.004	1	0.001	0.00031	global-SL%DT	CASSLSDTQYF	TCRBV09-01	TCRBJ02-03	NA	03/0911:T1D3_Tscm	1	-	-	-	-	-	-	-	-	-	-	-
15	SL%DT	5.1e-10	12	10	1.3e-09	1	0.004	1	0.001	0.00031	global-SL%DT	CASSLSDTQYF	TCRBV12-03	TCRBJ02-03	NA	03/0911:T1D3_Tscm	1	-	-	-	-	-	-	-	-	-	-	-
15	SL%DT	5.1e-10	12	10	1.3e-09	1	0.004	1	0.001	0.00031	global-SL%DT	CASSLSDTQYF	TCRBV07-09	TCRBJ02-03	NA	03/0913:T1D5_Tscm	1	-	-	-	-	-	-	-	-	-	-	-
15	SL%DT	5.1e-10	12	10	1.3e-09	1	0.004	1	0.001	0.00031	global-SL%DT	CASSLSDTQYF	TCRBV12-03	TCRBJ02-03	NA	03/0913:T1D5_Tscm	1	-	-	-	-	-	-	-	-	-	-	-
15	SL%DT	5.1e-10	12	10	1.3e-09	1	0.004	1	0.001	0.00031	global-SL%DT	CASSLSDTQYF	TCRBV11-02	TCRBJ02-03	NA	03/0913:T1D5_Tscm	1	-	-	-	-	-	-	-	-	-	-	-
16	SL%ET	5.2e-10	16	13	7.7e-11	1	0.001	1	0.001	7.7e-05	global-SL%ET	CASSLQETQYF	TCRBV05-06	TCRBJ02-05	NA	03/0902:HD2_Tscm	1	-	-	-	-	-	-	-	-	-	-	-
16	SL%ET	5.2e-10	16	13	7.7e-11	1	0.001	1	0.001	7.7e-05	global-SL%ET	CASSLQETQYF	TCRBV06-01	TCRBJ02-05	NA	03/0902:HD2_Tscm	1	-	-	-	-	-	-	-	-	-	-	-
16	SL%ET	5.2e-10	16	13	7.7e-11	1	0.001	1	0.001	7.7e-05	global-SL%ET	CASSLQETQYF	TCRBV06-02	TCRBJ02-05	NA	03/0902:HD2_Tscm	1	-	-	-	-	-	-	-	-	-	-	-
16	SL%ET	5.2e-10	16	13	7.7e-11	1	0.001	1	0.001	7.7e-05	global-SL%ET	CASSLQETQYF	TCRBV27-01	TCRBJ02-05	NA	03/0902:HD2_Tscm	1	-	-	-	-	-	-	-	-	-	-	-
16	SL%ET	5.2e-10	16	13	7.7e-11	1	0.001	1	0.001	7.7e-05	global-SL%ET	CASSLQETQYF	TCRBV11-02	TCRBJ02-05	NA	03/0902:HD2_Tscm	1	-	-	-	-	-	-	-	-	-	-	-
16	SL%ET	5.2e-10	16	13	7.7e-11	1	0.001	1	0.001	7.7e-05	global-SL%ET	CASSLQETQYF	TCRBV07-02	TCRBJ02-05	NA	03/0902:HD2_Tscm	1	-	-	-	-	-	-	-	-	-	-	-
16	SL%ET	5.2e-10	16	13	7.7e-11	1	0.001	1	0.001	7.7e-05	global-SL%ET	CASSLQETQYF	TCRBV18-01	TCRBJ02-05	NA	03/0902:HD2_Tscm	1	-	-	-	-	-	-	-	-	-	-	-
16	SL%ET	5.2e-10	16	13	7.7e-11	1	0.001	1	0.001	7.7e-05	global-SL%ET	CASSLQETQYF	TCRBV05-01	TCRBJ02-05	NA	03/0902:HD2_Tscm	1	-	-	-	-	-	-	-	-	-	-	-
16	SL%ET	5.2e-10	16	13	7.7e-11	1	0.001	1	0.001	7.7e-05	global-SL%ET	CASSLQETQYF	TCRBV12-03	TCRBJ02-05	NA	03/0902:HD2_Tscm	1	-	-	-	-	-	-	-	-	-	-	-
16	SL%ET	5.2e-10	16	13	7.7e-11	1	0.001	1	0.001	7.7e-05	global-SL%ET	CASSLQETQYF	TCRBV05-05	TCRBJ02-05	NA	03/0903:HD3_Tscm	1	-	-	-	-	-	-	-	-	-	-	-
16	SL%ET	5.2e-10	16	13	7.7e-11	1	0.001	1	0.001	7.7e-05	global-SL%ET	CASSLQETQYF	TCRBV18-01	TCRBJ02-05	NA	03/0903:HD3_Tscm	1	-	-	-	-	-	-	-	-	-	-	-
16	SL%ET	5.2e-10	16	13	7.7e-11	1	0.001	1	0.001	7.7e-05	global-SL%ET	CASSLQETQYF	TCRBV07-02	TCRBJ02-05	NA	03/0903:HD3_Tscm	1	-	-	-	-	-	-	-	-	-	-	-
16	SL%ET	5.2e-10	16	13	7.7e-11	1	0.001	1	0.001	7.7e-05	global-SL%ET	CASSLQETQYF	TCRBV05-04	TCRBJ02-05	NA	03/0903:HD3_Tscm	1	-	-	-	-	-	-	-	-	-	-	-
16	SL%ET	5.2e-10	16	13	7.7e-11	1	0.001	1	0.001	7.7e-05	global-SL%ET	CASSLQETQYF	TCRBV05-01	TCRBJ02-05	NA	03/0903:HD3_Tscm	1	-	-	-	-	-	-	-	-	-	-	-
16	SL%ET	5.2e-10	16	13	7.7e-11	1	0.001	1	0.001	7.7e-05	global-SL%ET	CASSLQETQYF	TCRBV07-02	TCRBJ02-05	NA	03/0904:HD4_Tscm	1	-	-	-	-	-	-	-	-	-	-	-
16	SL%ET	5.2e-10	16	13	7.7e-11	1	0.001	1	0.001	7.7e-05	global-SL%ET	CASSLQETQYF	TCRBV12-03	TCRBJ02-05	NA	03/0904:HD4_Tscm	1	-	-	-	-	-	-	-	-	-	-	-
16	SL%ET	5.2e-10	16	13	7.7e-11	1	0.001	1	0.001	7.7e-05	global-SL%ET	CASSLQETQYF	TCRBV05-06	TCRBJ02-05	NA	03/0906:HD6_Tscm	1	-	-	-	-	-	-	-	-	-	-	-
16	SL%ET	5.2e-10	16	13	7.7e-11	1	0.001	1	0.001	7.7e-05	global-SL%ET	CASSLQETQYF	TCRBV19-01	TCRBJ02-05	NA	03/0906:HD6_Tscm	1	-	-	-	-	-	-	-	-	-	-	-
16	SL%ET	5.2e-10	16	13	7.7e-11	1	0.001	1	0.001	7.7e-05	global-SL%ET	CASSLQETQYF	TCRBV07-02	TCRBJ02-05	NA	03/0906:HD6_Tscm	1	-	-	-	-	-	-	-	-	-	-	-
16	SL%ET	5.2e-10	16	13	7.7e-11	1	0.001	1	0.001	7.7e-05	global-SL%ET	CASSLQETQYF	TCRBV07-06	TCRBJ02-05	NA	03/0906:HD6_Tscm	1	-	-	-	-	-	-	-	-	-	-	-
16	SL%ET	5.2e-10	16	13	7.7e-11	1	0.001	1	0.001	7.7e-05	global-SL%ET	CASSLQETQYF	TCRBV05-04	TCRBJ02-05	NA	03/0906:HD6_Tscm	1	-	-	-	-	-	-	-	-	-	-	-
16	SL%ET	5.2e-10	16	13	7.7e-11	1	0.001	1	0.001	7.7e-05	global-SL%ET	CASSLQETQYF	TCRBV12-03	TCRBJ02-05	NA	03/0906:HD6_Tscm	1	-	-	-	-	-	-	-	-	-	-	-
16	SL%ET	5.2e-10	16	13	7.7e-11	1	0.001	1	0.001	7.7e-05	global-SL%ET	CASSLQETQYF	TCRBV07-08	TCRBJ02-05	NA	03/0906:HD6_Tscm	1	-	-	-	-	-	-	-	-	-	-	-
16	SL%ET	5.2e-10	16	13	7.7e-11	1	0.001	1	0.001	7.7e-05	global-SL%ET	CASSLQETQYF	TCRBV18-01	TCRBJ02-05	NA	03/0906:HD6_Tscm	1	-	-	-	-	-	-	-	-	-	-	-
16	SL%ET	5.2e-10	16	13	7.7e-11	1	0.001	1	0.001	7.7e-05	global-SL%ET	CASSLQETQYF	TCRBV05-01	TCRBJ02-05	NA	03/0906:HD6_Tscm	1	-	-	-	-	-	-	-	-	-	-	-
16	SL%ET	5.2e-10	16	13	7.7e-11	1	0.001	1	0.001	7.7e-05	global-SL%ET	CASSLQETQYF	TCRBV07-09	TCRBJ02-05	NA	03/0906:HD6_Tscm	1	-	-	-	-	-	-	-	-	-	-	-
16	SL%ET	5.2e-10	16	13	7.7e-11	1	0.001	1	0.001	7.7e-05	global-SL%ET	CASSLQETQYF	TCRBV06-05	TCRBJ02-05	NA	03/0907:HD7_Tscm	1	-	-	-	-	-	-	-	-	-	-	-
16	SL%ET	5.2e-10	16	13	7.7e-11	1	0.001	1	0.001	7.7e-05	global-SL%ET	CASSLQETQYF	TCRBV07-08	TCRBJ02-03	NA	03/0907:HD7_Tscm	1	-	-	-	-	-	-	-	-	-	-	-
16	SL%ET	5.2e-10	16	13	7.7e-11	1	0.001	1	0.001	7.7e-05	global-SL%ET	CASSLQETQYF	TCRBV07-02	TCRBJ02-05	NA	03/0907:HD7_Tscm	1	-	-	-	-	-	-	-	-	-	-	-
16	SL%ET	5.2e-10	16	13	7.7e-11	1	0.001	1	0.001	7.7e-05	global-SL%ET	CASSLQETQYF	TCRBV06-02	TCRBJ02-05	NA	03/0907:HD7_Tscm	1	-	-	-	-	-	-	-	-	-	-	-
16	SL%ET	5.2e-10	16	13	7.7e-11	1	0.001	1	0.001	7.7e-05	global-SL%ET	CASSLQETQYF	TCRBV12-03	TCRBJ02-05	NA	03/0907:HD7_Tscm	1	-	-	-	-	-	-	-	-	-	-	-
16	SL%ET	5.2e-10	16	13	7.7e-11	1	0.001	1	0.001	7.7e-05	global-SL%ET	CASSLQETQYF	TCRBV05-01	TCRBJ02-05	NA	03/0907:HD7_Tscm	1	-	-	-	-	-	-	-	-	-	-	-
16	SL%ET	5.2e-10	16	13	7.7e-11	1	0.001	1	0.001	7.7e-05	global-SL%ET	CASSLQETQYF	TCRBV07-09	TCRBJ02-05	NA	03/0907:HD7_Tscm	1	-	-	-	-	-	-	-	-	-	-	-
16	SL%ET	5.2e-10	16	13	7.7e-11	1	0.001	1	0.001	7.7e-05	global-SL%ET	CASSLQETQYF	TCRBV03-01	TCRBJ02-05	NA	03/0909:T1D1_Tscm	1	-	-	-	-	-	-	-	-	-	-	-
16	SL%ET	5.2e-10	16	13	7.7e-11	1	0.001	1	0.001	7.7e-05	global-SL%ET	CASSLQETQYF	TCRBV05-01	TCRBJ02-05	NA	03/0909:T1D1_Tscm	1	-	-	-	-	-	-	-	-	-	-	-
16	SL%ET	5.2e-10	16	13	7.7e-11	1	0.001	1	0.001	7.7e-05	global-SL%ET	CASSLQETQYF	TCRBV06-05	TCRBJ02-05	NA	03/0909:T1D1_Tscm	1	-	-	-	-	-	-	-	-	-	-	-
16	SL%ET	5.2e-10	16	13	7.7e-11	1	0.001	1	0.001	7.7e-05	global-SL%ET	CASSLQETQYF	TCRBV28-01	TCRBJ02-05	NA	03/0909:T1D1_Tscm	1	-	-	-	-	-	-	-	-	-	-	-
16	SL%ET	5.2e-10	16	13	7.7e-11	1	0.001	1	0.001	7.7e-05	global-SL%ET	CASSLQETQYF	TCRBV07-09	TCRBJ02-05	NA	03/0910:T1D2_Tscm	1	-	-	-	-	-	-	-	-	-	-	-
16	SL%ET	5.2e-10	16	13	7.7e-11	1	0.001	1	0.001	7.7e-05	global-SL%ET	CASSLQETQYF	TCRBV07-02	TCRBJ02-05	NA	03/0910:T1D2_Tscm	1	-	-	-	-	-	-	-	-	-	-	-
16	SL%ET	5.2e-10	16	13	7.7e-11	1	0.001	1	0.001	7.7e-05	global-SL%ET	CASSLQETQYF	TCRBV05-01	TCRBJ02-05	NA	03/0910:T1D2_Tscm	1	-	-	-	-	-	-	-	-	-	-	-
16	SL%ET	5.2e-10	16	13	7.7e-11	1	0.001	1	0.001	7.7e-05	global-SL%ET	CASSLQETQYF	TCRBV07-08	TCRBJ02-05	NA	03/0911:T1D3_Tscm	1	-	-	-	-	-	-	-	-	-	-	-
16	SL%ET	5.2e-10	16	13	7.7e-11	1	0.001	1	0.001	7.7e-05	global-SL%ET	CASSLQETQYF	TCRBV05-01	TCRBJ02-05	NA	03/0911:T1D3_Tscm	1	-	-	-	-	-	-	-	-	-	-	-
16	SL%ET	5.2e-10	16	13	7.7e-11	1	0.001	1	0.001	7.7e-05	global-SL%ET	CASSLQETQYF	TCRBV07-09	TCRBJ02-05	NA	03/0911:T1D3_Tscm	1	-	-	-	-	-	-	-	-	-	-	-
16	SL%ET	5.2e-10	16	13	7.7e-11	1	0.001	1	0.001	7.7e-05	global-SL%ET	CASSLQETQYF	TCRBV07-02	TCRBJ02-05	NA	03/0911:T1D3_Tscm	1	-	-	-	-	-	-	-	-	-	-	-
16	SL%ET	5.2e-10	16	13	7.7e-11	1	0.001	1	0.001	7.7e-05	global-SL%ET	CASSLQETQYF	TCRBV18-01	TCRBJ02-05	NA	03/0911:T1D3_Tscm	1	-	-	-	-	-	-	-	-	-	-	-
16	SL%ET	5.2e-10	16	13	7.7e-11	1	0.001	1	0.001	7.7e-05	global-SL%ET	CASSLQETQYF	TCRBV07-02	TCRBJ02-05	NA	03/0912:T1D4_Tscm	1	-	-	-	-	-	-	-	-	-	-	-
16	SL%ET	5.2e-10	16	13	7.7e-11	1	0.001	1	0.001	7.7e-05	global-SL%ET	CASSLQETQYF	TCRBV18-01	TCRBJ02-05	NA	03/0912:T1D4_Tscm	1	-	-	-	-	-	-	-	-	-	-	-
16	SL%ET	5.2e-10	16	13	7.7e-11	1	0.001	1	0.001	7.7e-05	global-SL%ET	CASSLQETQYF	TCRBV27-01	TCRBJ02-05	NA	03/0912:T1D4_Tscm	1	-	-	-	-	-	-	-	-	-	-	-
16	SL%ET	5.2e-10	16	13	7.7e-11	1	0.001	1	0.001	7.7e-05	global-SL%ET	CASSLQETQYF	TCRBV05-01	TCRBJ02-05	NA	03/0912:T1D4_Tscm	1	-	-	-	-	-	-	-	-	-	-	-
16	SL%ET	5.2e-10	16	13	7.7e-11	1	0.001	1	0.001	7.7e-05	global-SL%ET	CASSLQETQYF	TCRBV28-01	TCRBJ02-05	NA	03/0912:T1D4_Tscm	1	-	-	-	-	-	-	-	-	-	-	-
16	SL%ET	5.2e-10	16	13	7.7e-11	1	0.001	1	0.001	7.7e-05	global-SL%ET	CASSLQETQYF	TCRBV07-06	TCRBJ02-05	NA	03/0912:T1D4_Tscm	1	-	-	-	-	-	-	-	-	-	-	-
16	SL%ET	5.2e-10	16	13	7.7e-11	1	0.001	1	0.001	7.7e-05	global-SL%ET	CASSLQETQYF	TCRBV07-09	TCRBJ02-05	NA	03/0912:T1D4_Tscm	1	-	-	-	-	-	-	-	-	-	-	-
16	SL%ET	5.2e-10	16	13	7.7e-11	1	0.001	1	0.001	7.7e-05	global-SL%ET	CASSLQETQYF	TCRBV12-03	TCRBJ02-05	NA	03/0912:T1D4_Tscm	1	-	-	-	-	-	-	-	-	-	-	-
16	SL%ET	5.2e-10	16	13	7.7e-11	1	0.001	1	0.001	7.7e-05	global-SL%ET	CASSLQETQYF	TCRBV14-01	TCRBJ02-05	NA	03/0913:T1D5_Tscm	1	-	-	-	-	-	-	-	-	-	-	-
16	SL%ET	5.2e-10	16	13	7.7e-11	1	0.001	1	0.001	7.7e-05	global-SL%ET	CASSLQETQYF	TCRBV03-01	TCRBJ02-05	NA	03/0913:T1D5_Tscm	1	-	-	-	-	-	-	-	-	-	-	-
16	SL%ET	5.2e-10	16	13	7.7e-11	1	0.001	1	0.001	7.7e-05	global-SL%ET	CASSLQETQYF	TCRBV05-01	TCRBJ02-05	NA	03/0913:T1D5_Tscm	1	-	-	-	-	-	-	-	-	-	-	-
16	SL%ET	5.2e-10	16	13	7.7e-11	1	0.001	1	0.001	7.7e-05	global-SL%ET	CASSLQETQYF	TCRBV05-04	TCRBJ02-05	NA	03/0914:T1D6_Tscm	1	-	-	-	-	-	-	-	-	-	-	-
16	SL%ET	5.2e-10	16	13	7.7e-11	1	0.001	1	0.001	7.7e-05	global-SL%ET	CASSLQETQYF	TCRBV05-01	TCRBJ02-05	NA	03/0914:T1D6_Tscm	1	-	-	-	-	-	-	-	-	-	-	-
16	SL%ET	5.2e-10	16	13	7.7e-11	1	0.001	1	0.001	7.7e-05	global-SL%ET	CASSLQETQYF	TCRBV12-03	TCRBJ02-05	NA	03/0914:T1D6_Tscm	1	-	-	-	-	-	-	-	-	-	-	-
16	SL%ET	5.2e-10	16	13	7.7e-11	1	0.001	1	0.001	7.7e-05	global-SL%ET	CASSLQETQYF	TCRBV05-01	TCRBJ02-05	NA	03/0915:T1D7_Tscm	1	-	-	-	-	-	-	-	-	-	-	-
16	SL%ET	5.2e-10	16	13	7.7e-11	1	0.001	1	0.001	7.7e-05	global-SL%ET	CASSLQETQYF	TCRBV28-01	TCRBJ02-05	NA	03/0915:T1D7_Tscm	1	-	-	-	-	-	-	-	-	-	-	-
16	SL%ET	5.2e-10	16	13	7.7e-11	1	0.001	1	0.001	7.7e-05	global-SL%ET	CASSLQETQYF	TCRBV18-01	TCRBJ02-05	NA	03/0915:T1D7_Tscm	1	-	-	-	-	-	-	-	-	-	-	-
16	SL%ET	5.2e-10	16	13	7.7e-11	1	0.001	1	0.001	7.7e-05	global-SL%ET	CASSLQETQYF	TCRBV02-01	TCRBJ02-05	NA	03/0915:T1D7_Tscm	1	-	-	-	-	-	-	-	-	-	-	-
16	SL%ET	5.2e-10	16	13	7.7e-11	1	0.001	1	0.001	7.7e-05	global-SL%ET	CASSLQETQYF	TCRBV07-09	TCRBJ02-05	NA	03/0915:T1D7_Tscm	1	-	-	-	-	-	-	-	-	-	-	-
16	SL%ET	5.2e-10	16	13	7.7e-11	1	0.001	1	0.001	7.7e-05	global-SL%ET	CASSLMETQYF	TCRBV07-02	TCRBJ02-05	NA	03/0902:HD2_Tscm	1	-	-	-	-	-	-	-	-	-	-	-
16	SL%ET	5.2e-10	16	13	7.7e-11	1	0.001	1	0.001	7.7e-05	global-SL%ET	CASSLMETQYF	TCRBV07-09	TCRBJ02-05	NA	03/0902:HD2_Tscm	1	-	-	-	-	-	-	-	-	-	-	-
16	SL%ET	5.2e-10	16	13	7.7e-11	1	0.001	1	0.001	7.7e-05	global-SL%ET	CASSLIETQYF	TCRBV07-09	TCRBJ02-05	NA	03/0912:T1D4_Tscm	1	-	-	-	-	-	-	-	-	-	-	-
16	SL%ET	5.2e-10	16	13	7.7e-11	1	0.001	1	0.001	7.7e-05	global-SL%ET	CASSLVETQYF	TCRBV07-09	TCRBJ02-05	NA	03/0903:HD3_Tscm	1	-	-	-	-	-	-	-	-	-	-	-
16	SL%ET	5.2e-10	16	13	7.7e-11	1	0.001	1	0.001	7.7e-05	global-SL%ET	CASSLVETQYF	TCRBV07-02	TCRBJ02-05	NA	03/0903:HD3_Tscm	1	-	-	-	-	-	-	-	-	-	-	-
16	SL%ET	5.2e-10	16	13	7.7e-11	1	0.001	1	0.001	7.7e-05	global-SL%ET	CASSLVETQYF	TCRBV05-05	TCRBJ02-05	NA	03/0906:HD6_Tscm	1	-	-	-	-	-	-	-	-	-	-	-
16	SL%ET	5.2e-10	16	13	7.7e-11	1	0.001	1	0.001	7.7e-05	global-SL%ET	CASSLVETQYF	TCRBV05-01	TCRBJ02-05	NA	03/0906:HD6_Tscm	1	-	-	-	-	-	-	-	-	-	-	-
16	SL%ET	5.2e-10	16	13	7.7e-11	1	0.001	1	0.001	7.7e-05	global-SL%ET	CASSLVETQYF	TCRBV07-09	TCRBJ02-05	NA	03/0906:HD6_Tscm	1	-	-	-	-	-	-	-	-	-	-	-
16	SL%ET	5.2e-10	16	13	7.7e-11	1	0.001	1	0.001	7.7e-05	global-SL%ET	CASSLVETQYF	TCRBV11-02	TCRBJ02-05	NA	03/0906:HD6_Tscm	1	-	-	-	-	-	-	-	-	-	-	-
16	SL%ET	5.2e-10	16	13	7.7e-11	1	0.001	1	0.001	7.7e-05	global-SL%ET	CASSLVETQYF	TCRBV07-02	TCRBJ02-05	NA	03/0906:HD6_Tscm	1	-	-	-	-	-	-	-	-	-	-	-
16	SL%ET	5.2e-10	16	13	7.7e-11	1	0.001	1	0.001	7.7e-05	global-SL%ET	CASSLVETQYF	TCRBV07-08	TCRBJ02-05	NA	03/0911:T1D3_Tscm	1	-	-	-	-	-	-	-	-	-	-	-
16	SL%ET	5.2e-10	16	13	7.7e-11	1	0.001	1	0.001	7.7e-05	global-SL%ET	CASSLVETQYF	TCRBV06-01	TCRBJ02-05	NA	03/0911:T1D3_Tscm	1	-	-	-	-	-	-	-	-	-	-	-
16	SL%ET	5.2e-10	16	13	7.7e-11	1	0.001	1	0.001	7.7e-05	global-SL%ET	CASSLVETQYF	TCRBV07-09	TCRBJ02-05	NA	03/0911:T1D3_Tscm	1	-	-	-	-	-	-	-	-	-	-	-
16	SL%ET	5.2e-10	16	13	7.7e-11	1	0.001	1	0.001	7.7e-05	global-SL%ET	CASSLVETQYF	TCRBV06-02	TCRBJ02-05	NA	03/0911:T1D3_Tscm	1	-	-	-	-	-	-	-	-	-	-	-
16	SL%ET	5.2e-10	16	13	7.7e-11	1	0.001	1	0.001	7.7e-05	global-SL%ET	CASSLVETQYF	TCRBV07-02	TCRBJ02-05	NA	03/0911:T1D3_Tscm	1	-	-	-	-	-	-	-	-	-	-	-
16	SL%ET	5.2e-10	16	13	7.7e-11	1	0.001	1	0.001	7.7e-05	global-SL%ET	CASSLVETQYF	TCRBV07-02	TCRBJ02-05	NA	03/0914:T1D6_Tscm	1	-	-	-	-	-	-	-	-	-	-	-
16	SL%ET	5.2e-10	16	13	7.7e-11	1	0.001	1	0.001	7.7e-05	global-SL%ET	CASSLVETQYF	TCRBV05-05	TCRBJ02-05	NA	03/0915:T1D7_Tscm	1	-	-	-	-	-	-	-	-	-	-	-
16	SL%ET	5.2e-10	16	13	7.7e-11	1	0.001	1	0.001	7.7e-05	global-SL%ET	CASSLVETQYF	TCRBV07-08	TCRBJ02-05	NA	03/0915:T1D7_Tscm	1	-	-	-	-	-	-	-	-	-	-	-
16	SL%ET	5.2e-10	16	13	7.7e-11	1	0.001	1	0.001	7.7e-05	global-SL%ET	CASSLVETQYF	TCRBV07-09	TCRBJ02-05	NA	03/0915:T1D7_Tscm	1	-	-	-	-	-	-	-	-	-	-	-
16	SL%ET	5.2e-10	16	13	7.7e-11	1	0.001	1	0.001	7.7e-05	global-SL%ET	CASSLLETQYF	TCRBV07-02	TCRBJ02-05	NA	03/0908:HD8_Tscm	1	-	-	-	-	-	-	-	-	-	-	-
16	SL%ET	5.2e-10	16	13	7.7e-11	1	0.001	1	0.001	7.7e-05	global-SL%ET	CASSLLETQYF	TCRBV12-03	TCRBJ02-05	NA	03/0908:HD8_Tscm	1	-	-	-	-	-	-	-	-	-	-	-
16	SL%ET	5.2e-10	16	13	7.7e-11	1	0.001	1	0.001	7.7e-05	global-SL%ET	CASSLLETQYF	TCRBV07-03	TCRBJ02-05	NA	03/0915:T1D7_Tscm	1	-	-	-	-	-	-	-	-	-	-	-
16	SL%ET	5.2e-10	16	13	7.7e-11	1	0.001	1	0.001	7.7e-05	global-SL%ET	CASSLLETQYF	TCRBV03-01	TCRBJ02-05	NA	03/0915:T1D7_Tscm	1	-	-	-	-	-	-	-	-	-	-	-
16	SL%ET	5.2e-10	16	13	7.7e-11	1	0.001	1	0.001	7.7e-05	global-SL%ET	CASSLLETQYF	TCRBV12-03	TCRBJ02-05	NA	03/0915:T1D7_Tscm	1	-	-	-	-	-	-	-	-	-	-	-
16	SL%ET	5.2e-10	16	13	7.7e-11	1	0.001	1	0.001	7.7e-05	global-SL%ET	CASSLLETQYF	TCRBV05-01	TCRBJ02-05	NA	03/0915:T1D7_Tscm	1	-	-	-	-	-	-	-	-	-	-	-
16	SL%ET	5.2e-10	16	13	7.7e-11	1	0.001	1	0.001	7.7e-05	global-SL%ET	CASSLLETQYF	TCRBV07-09	TCRBJ02-05	NA	03/0915:T1D7_Tscm	1	-	-	-	-	-	-	-	-	-	-	-
16	SL%ET	5.2e-10	16	13	7.7e-11	1	0.001	1	0.001	7.7e-05	global-SL%ET	CASSLAETQYF	TCRBV07-06	TCRBJ02-05	NA	03/0902:HD2_Tscm	1	-	-	-	-	-	-	-	-	-	-	-
16	SL%ET	5.2e-10	16	13	7.7e-11	1	0.001	1	0.001	7.7e-05	global-SL%ET	CASSLAETQYF	TCRBV07-02	TCRBJ02-05	NA	03/0902:HD2_Tscm	1	-	-	-	-	-	-	-	-	-	-	-
16	SL%ET	5.2e-10	16	13	7.7e-11	1	0.001	1	0.001	7.7e-05	global-SL%ET	CASSLAETQYF	TCRBV05-01	TCRBJ02-05	NA	03/0902:HD2_Tscm	1	-	-	-	-	-	-	-	-	-	-	-
16	SL%ET	5.2e-10	16	13	7.7e-11	1	0.001	1	0.001	7.7e-05	global-SL%ET	CASSLAETQYF	TCRBV03-01	TCRBJ02-05	NA	03/0902:HD2_Tscm	1	-	-	-	-	-	-	-	-	-	-	-
16	SL%ET	5.2e-10	16	13	7.7e-11	1	0.001	1	0.001	7.7e-05	global-SL%ET	CASSLAETQYF	TCRBV07-09	TCRBJ02-05	NA	03/0902:HD2_Tscm	1	-	-	-	-	-	-	-	-	-	-	-
16	SL%ET	5.2e-10	16	13	7.7e-11	1	0.001	1	0.001	7.7e-05	global-SL%ET	CASSLAETQYF	TCRBV07-06	TCRBJ02-05	NA	03/0906:HD6_Tscm	1	-	-	-	-	-	-	-	-	-	-	-
16	SL%ET	5.2e-10	16	13	7.7e-11	1	0.001	1	0.001	7.7e-05	global-SL%ET	CASSLAETQYF	TCRBV07-02	TCRBJ02-05	NA	03/0906:HD6_Tscm	1	-	-	-	-	-	-	-	-	-	-	-
16	SL%ET	5.2e-10	16	13	7.7e-11	1	0.001	1	0.001	7.7e-05	global-SL%ET	CASSLAETQYF	TCRBV05-01	TCRBJ02-05	NA	03/0906:HD6_Tscm	1	-	-	-	-	-	-	-	-	-	-	-
16	SL%ET	5.2e-10	16	13	7.7e-11	1	0.001	1	0.001	7.7e-05	global-SL%ET	CASSLAETQYF	TCRBV07-02	TCRBJ02-05	NA	03/0907:HD7_Tscm	1	-	-	-	-	-	-	-	-	-	-	-
16	SL%ET	5.2e-10	16	13	7.7e-11	1	0.001	1	0.001	7.7e-05	global-SL%ET	CASSLAETQYF	TCRBV05-06	TCRBJ02-05	NA	03/0907:HD7_Tscm	1	-	-	-	-	-	-	-	-	-	-	-
16	SL%ET	5.2e-10	16	13	7.7e-11	1	0.001	1	0.001	7.7e-05	global-SL%ET	CASSLAETQYF	TCRBV28-01	TCRBJ02-05	NA	03/0907:HD7_Tscm	1	-	-	-	-	-	-	-	-	-	-	-
16	SL%ET	5.2e-10	16	13	7.7e-11	1	0.001	1	0.001	7.7e-05	global-SL%ET	CASSLAETQYF	TCRBV12-03	TCRBJ02-05	NA	03/0907:HD7_Tscm	1	-	-	-	-	-	-	-	-	-	-	-
16	SL%ET	5.2e-10	16	13	7.7e-11	1	0.001	1	0.001	7.7e-05	global-SL%ET	CASSLAETQYF	TCRBV05-01	TCRBJ02-05	NA	03/0907:HD7_Tscm	1	-	-	-	-	-	-	-	-	-	-	-
16	SL%ET	5.2e-10	16	13	7.7e-11	1	0.001	1	0.001	7.7e-05	global-SL%ET	CASSLAETQYF	TCRBV07-09	TCRBJ02-05	NA	03/0907:HD7_Tscm	1	-	-	-	-	-	-	-	-	-	-	-
16	SL%ET	5.2e-10	16	13	7.7e-11	1	0.001	1	0.001	7.7e-05	global-SL%ET	CASSLAETQYF	TCRBV28-01	TCRBJ02-05	NA	03/0915:T1D7_Tscm	1	-	-	-	-	-	-	-	-	-	-	-
16	SL%ET	5.2e-10	16	13	7.7e-11	1	0.001	1	0.001	7.7e-05	global-SL%ET	CASSLAETQYF	TCRBV05-01	TCRBJ02-05	NA	03/0915:T1D7_Tscm	1	-	-	-	-	-	-	-	-	-	-	-
16	SL%ET	5.2e-10	16	13	7.7e-11	1	0.001	1	0.001	7.7e-05	global-SL%ET	CASSLAETQYF	TCRBV07-02	TCRBJ02-05	NA	03/0915:T1D7_Tscm	1	-	-	-	-	-	-	-	-	-	-	-
16	SL%ET	5.2e-10	16	13	7.7e-11	1	0.001	1	0.001	7.7e-05	global-SL%ET	CAWSLGETQYF	TCRBV30-01	TCRBJ02-05	NA	03/0913:T1D5_Tscm	1	-	-	-	-	-	-	-	-	-	-	-
16	SL%ET	5.2e-10	16	13	7.7e-11	1	0.001	1	0.001	7.7e-05	global-SL%ET	CASSLGETQYF	TCRBV07-06	TCRBJ02-05	NA	03/0901:HD1_Tscm	1	-	-	-	-	-	-	-	-	-	-	-
16	SL%ET	5.2e-10	16	13	7.7e-11	1	0.001	1	0.001	7.7e-05	global-SL%ET	CASSLGETQYF	TCRBV07-08	TCRBJ02-05	NA	03/0901:HD1_Tscm	1	-	-	-	-	-	-	-	-	-	-	-
16	SL%ET	5.2e-10	16	13	7.7e-11	1	0.001	1	0.001	7.7e-05	global-SL%ET	CASSLGETQYF	TCRBV05-06	TCRBJ02-05	NA	03/0901:HD1_Tscm	1	-	-	-	-	-	-	-	-	-	-	-
16	SL%ET	5.2e-10	16	13	7.7e-11	1	0.001	1	0.001	7.7e-05	global-SL%ET	CASSLGETQYF	TCRBV12-03	TCRBJ02-05	NA	03/0901:HD1_Tscm	1	-	-	-	-	-	-	-	-	-	-	-
16	SL%ET	5.2e-10	16	13	7.7e-11	1	0.001	1	0.001	7.7e-05	global-SL%ET	CASSLGETQYF	TCRBV11-02	TCRBJ02-05	NA	03/0902:HD2_Tscm	1	-	-	-	-	-	-	-	-	-	-	-
16	SL%ET	5.2e-10	16	13	7.7e-11	1	0.001	1	0.001	7.7e-05	global-SL%ET	CASSLGETQYF	TCRBV05-01	TCRBJ02-05	NA	03/0902:HD2_Tscm	1	-	-	-	-	-	-	-	-	-	-	-
16	SL%ET	5.2e-10	16	13	7.7e-11	1	0.001	1	0.001	7.7e-05	global-SL%ET	CASSLGETQYF	TCRBV11-03	TCRBJ02-05	NA	03/0902:HD2_Tscm	1	-	-	-	-	-	-	-	-	-	-	-
16	SL%ET	5.2e-10	16	13	7.7e-11	1	0.001	1	0.001	7.7e-05	global-SL%ET	CASSLGETQYF	TCRBV06-02	TCRBJ02-05	NA	03/0902:HD2_Tscm	1	-	-	-	-	-	-	-	-	-	-	-
16	SL%ET	5.2e-10	16	13	7.7e-11	1	0.001	1	0.001	7.7e-05	global-SL%ET	CASSLGETQYF	TCRBV07-07	TCRBJ02-05	NA	03/0902:HD2_Tscm	1	-	-	-	-	-	-	-	-	-	-	-
16	SL%ET	5.2e-10	16	13	7.7e-11	1	0.001	1	0.001	7.7e-05	global-SL%ET	CASSLGETQYF	TCRBV12-03	TCRBJ02-05	NA	03/0902:HD2_Tscm	1	-	-	-	-	-	-	-	-	-	-	-
16	SL%ET	5.2e-10	16	13	7.7e-11	1	0.001	1	0.001	7.7e-05	global-SL%ET	CASSLGETQYF	TCRBV05-04	TCRBJ02-05	NA	03/0902:HD2_Tscm	1	-	-	-	-	-	-	-	-	-	-	-
16	SL%ET	5.2e-10	16	13	7.7e-11	1	0.001	1	0.001	7.7e-05	global-SL%ET	CASSLGETQYF	TCRBV07-02	TCRBJ02-05	NA	03/0902:HD2_Tscm	1	-	-	-	-	-	-	-	-	-	-	-
16	SL%ET	5.2e-10	16	13	7.7e-11	1	0.001	1	0.001	7.7e-05	global-SL%ET	CASSLGETQYF	TCRBV07-09	TCRBJ02-05	NA	03/0902:HD2_Tscm	1	-	-	-	-	-	-	-	-	-	-	-
16	SL%ET	5.2e-10	16	13	7.7e-11	1	0.001	1	0.001	7.7e-05	global-SL%ET	CASSLGETQYF	TCRBV11-02	TCRBJ02-05	NA	03/0903:HD3_Tscm	1	-	-	-	-	-	-	-	-	-	-	-
16	SL%ET	5.2e-10	16	13	7.7e-11	1	0.001	1	0.001	7.7e-05	global-SL%ET	CASSLGETQYF	TCRBV13-01	TCRBJ02-05	NA	03/0903:HD3_Tscm	1	-	-	-	-	-	-	-	-	-	-	-
16	SL%ET	5.2e-10	16	13	7.7e-11	1	0.001	1	0.001	7.7e-05	global-SL%ET	CASSLGETQYF	TCRBV07-06	TCRBJ02-05	NA	03/0903:HD3_Tscm	1	-	-	-	-	-	-	-	-	-	-	-
16	SL%ET	5.2e-10	16	13	7.7e-11	1	0.001	1	0.001	7.7e-05	global-SL%ET	CASSLGETQYF	TCRBV05-01	TCRBJ02-05	NA	03/0903:HD3_Tscm	1	-	-	-	-	-	-	-	-	-	-	-
16	SL%ET	5.2e-10	16	13	7.7e-11	1	0.001	1	0.001	7.7e-05	global-SL%ET	CASSLGETQYF	TCRBV07-09	TCRBJ02-05	NA	03/0903:HD3_Tscm	1	-	-	-	-	-	-	-	-	-	-	-
16	SL%ET	5.2e-10	16	13	7.7e-11	1	0.001	1	0.001	7.7e-05	global-SL%ET	CASSLGETQYF	TCRBV05-06	TCRBJ02-05	NA	03/0903:HD3_Tscm	1	-	-	-	-	-	-	-	-	-	-	-
16	SL%ET	5.2e-10	16	13	7.7e-11	1	0.001	1	0.001	7.7e-05	global-SL%ET	CASSLGETQYF	TCRBV05-05	TCRBJ02-05	NA	03/0904:HD4_Tscm	1	-	-	-	-	-	-	-	-	-	-	-
16	SL%ET	5.2e-10	16	13	7.7e-11	1	0.001	1	0.001	7.7e-05	global-SL%ET	CASSLGETQYF	TCRBV27-01	TCRBJ02-05	NA	03/0904:HD4_Tscm	1	-	-	-	-	-	-	-	-	-	-	-
16	SL%ET	5.2e-10	16	13	7.7e-11	1	0.001	1	0.001	7.7e-05	global-SL%ET	CASSLGETQYF	TCRBV28-01	TCRBJ02-05	NA	03/0904:HD4_Tscm	1	-	-	-	-	-	-	-	-	-	-	-
16	SL%ET	5.2e-10	16	13	7.7e-11	1	0.001	1	0.001	7.7e-05	global-SL%ET	CASSLGETQYF	TCRBV14-01	TCRBJ02-05	NA	03/0906:HD6_Tscm	1	-	-	-	-	-	-	-	-	-	-	-
16	SL%ET	5.2e-10	16	13	7.7e-11	1	0.001	1	0.001	7.7e-05	global-SL%ET	CASSLGETQYF	TCRBV19-01	TCRBJ02-05	NA	03/0906:HD6_Tscm	1	-	-	-	-	-	-	-	-	-	-	-
16	SL%ET	5.2e-10	16	13	7.7e-11	1	0.001	1	0.001	7.7e-05	global-SL%ET	CASSLGETQYF	TCRBV05-06	TCRBJ02-05	NA	03/0906:HD6_Tscm	1	-	-	-	-	-	-	-	-	-	-	-
16	SL%ET	5.2e-10	16	13	7.7e-11	1	0.001	1	0.001	7.7e-05	global-SL%ET	CASSLGETQYF	TCRBV07-06	TCRBJ02-05	NA	03/0906:HD6_Tscm	1	-	-	-	-	-	-	-	-	-	-	-
16	SL%ET	5.2e-10	16	13	7.7e-11	1	0.001	1	0.001	7.7e-05	global-SL%ET	CASSLGETQYF	TCRBV05-05	TCRBJ02-05	NA	03/0906:HD6_Tscm	1	-	-	-	-	-	-	-	-	-	-	-
16	SL%ET	5.2e-10	16	13	7.7e-11	1	0.001	1	0.001	7.7e-05	global-SL%ET	CASSLGETQYF	TCRBV28-01	TCRBJ02-05	NA	03/0906:HD6_Tscm	1	-	-	-	-	-	-	-	-	-	-	-
16	SL%ET	5.2e-10	16	13	7.7e-11	1	0.001	1	0.001	7.7e-05	global-SL%ET	CASSLGETQYF	TCRBV11-03	TCRBJ02-05	NA	03/0906:HD6_Tscm	1	-	-	-	-	-	-	-	-	-	-	-
16	SL%ET	5.2e-10	16	13	7.7e-11	1	0.001	1	0.001	7.7e-05	global-SL%ET	CASSLGETQYF	TCRBV07-02	TCRBJ02-05	NA	03/0906:HD6_Tscm	1	-	-	-	-	-	-	-	-	-	-	-
16	SL%ET	5.2e-10	16	13	7.7e-11	1	0.001	1	0.001	7.7e-05	global-SL%ET	CASSLGETQYF	TCRBV07-09	TCRBJ02-05	NA	03/0906:HD6_Tscm	1	-	-	-	-	-	-	-	-	-	-	-
16	SL%ET	5.2e-10	16	13	7.7e-11	1	0.001	1	0.001	7.7e-05	global-SL%ET	CASSLGETQYF	TCRBV12-03	TCRBJ02-05	NA	03/0906:HD6_Tscm	1	-	-	-	-	-	-	-	-	-	-	-
16	SL%ET	5.2e-10	16	13	7.7e-11	1	0.001	1	0.001	7.7e-05	global-SL%ET	CASSLGETQYF	TCRBV05-04	TCRBJ02-05	NA	03/0906:HD6_Tscm	1	-	-	-	-	-	-	-	-	-	-	-
16	SL%ET	5.2e-10	16	13	7.7e-11	1	0.001	1	0.001	7.7e-05	global-SL%ET	CASSLGETQYF	TCRBV11-02	TCRBJ02-05	NA	03/0906:HD6_Tscm	1	-	-	-	-	-	-	-	-	-	-	-
16	SL%ET	5.2e-10	16	13	7.7e-11	1	0.001	1	0.001	7.7e-05	global-SL%ET	CASSLGETQYF	TCRBV05-01	TCRBJ02-05	NA	03/0906:HD6_Tscm	1	-	-	-	-	-	-	-	-	-	-	-
16	SL%ET	5.2e-10	16	13	7.7e-11	1	0.001	1	0.001	7.7e-05	global-SL%ET	CASSLGETQYF	TCRBV07-09	TCRBJ02-05	NA	03/0907:HD7_Tscm	1	-	-	-	-	-	-	-	-	-	-	-
16	SL%ET	5.2e-10	16	13	7.7e-11	1	0.001	1	0.001	7.7e-05	global-SL%ET	CASSLGETQYF	TCRBV07-02	TCRBJ02-05	NA	03/0907:HD7_Tscm	1	-	-	-	-	-	-	-	-	-	-	-
16	SL%ET	5.2e-10	16	13	7.7e-11	1	0.001	1	0.001	7.7e-05	global-SL%ET	CASSLGETQYF	TCRBV07-03	TCRBJ02-05	NA	03/0907:HD7_Tscm	1	-	-	-	-	-	-	-	-	-	-	-
16	SL%ET	5.2e-10	16	13	7.7e-11	1	0.001	1	0.001	7.7e-05	global-SL%ET	CASSLGETQYF	TCRBV11-02	TCRBJ02-05	NA	03/0907:HD7_Tscm	1	-	-	-	-	-	-	-	-	-	-	-
16	SL%ET	5.2e-10	16	13	7.7e-11	1	0.001	1	0.001	7.7e-05	global-SL%ET	CASSLGETQYF	TCRBV07-06	TCRBJ02-05	NA	03/0907:HD7_Tscm	1	-	-	-	-	-	-	-	-	-	-	-
16	SL%ET	5.2e-10	16	13	7.7e-11	1	0.001	1	0.001	7.7e-05	global-SL%ET	CASSLGETQYF	TCRBV03-01	TCRBJ02-05	NA	03/0907:HD7_Tscm	1	-	-	-	-	-	-	-	-	-	-	-
16	SL%ET	5.2e-10	16	13	7.7e-11	1	0.001	1	0.001	7.7e-05	global-SL%ET	CASSLGETQYF	TCRBV27-01	TCRBJ02-05	NA	03/0907:HD7_Tscm	1	-	-	-	-	-	-	-	-	-	-	-
16	SL%ET	5.2e-10	16	13	7.7e-11	1	0.001	1	0.001	7.7e-05	global-SL%ET	CASSLGETQYF	TCRBV05-01	TCRBJ02-05	NA	03/0907:HD7_Tscm	1	-	-	-	-	-	-	-	-	-	-	-
16	SL%ET	5.2e-10	16	13	7.7e-11	1	0.001	1	0.001	7.7e-05	global-SL%ET	CASSLGETQYF	TCRBV12-03	TCRBJ02-05	NA	03/0907:HD7_Tscm	1	-	-	-	-	-	-	-	-	-	-	-
16	SL%ET	5.2e-10	16	13	7.7e-11	1	0.001	1	0.001	7.7e-05	global-SL%ET	CASSLGETQYF	TCRBV11-01	TCRBJ02-05	NA	03/0907:HD7_Tscm	1	-	-	-	-	-	-	-	-	-	-	-
16	SL%ET	5.2e-10	16	13	7.7e-11	1	0.001	1	0.001	7.7e-05	global-SL%ET	CASSLGETQYF	TCRBV02-01	TCRBJ02-05	NA	03/0907:HD7_Tscm	1	-	-	-	-	-	-	-	-	-	-	-
16	SL%ET	5.2e-10	16	13	7.7e-11	1	0.001	1	0.001	7.7e-05	global-SL%ET	CASSLGETQYF	TCRBV07-08	TCRBJ02-05	NA	03/0908:HD8_Tscm	1	-	-	-	-	-	-	-	-	-	-	-
16	SL%ET	5.2e-10	16	13	7.7e-11	1	0.001	1	0.001	7.7e-05	global-SL%ET	CASSLGETQYF	TCRBV07-06	TCRBJ02-05	NA	03/0908:HD8_Tscm	1	-	-	-	-	-	-	-	-	-	-	-
16	SL%ET	5.2e-10	16	13	7.7e-11	1	0.001	1	0.001	7.7e-05	global-SL%ET	CASSLGETQYF	TCRBV07-02	TCRBJ02-05	NA	03/0908:HD8_Tscm	1	-	-	-	-	-	-	-	-	-	-	-
16	SL%ET	5.2e-10	16	13	7.7e-11	1	0.001	1	0.001	7.7e-05	global-SL%ET	CASSLGETQYF	TCRBV05-05	TCRBJ02-05	NA	03/0908:HD8_Tscm	1	-	-	-	-	-	-	-	-	-	-	-
16	SL%ET	5.2e-10	16	13	7.7e-11	1	0.001	1	0.001	7.7e-05	global-SL%ET	CASSLGETQYF	TCRBV07-09	TCRBJ02-05	NA	03/0908:HD8_Tscm	1	-	-	-	-	-	-	-	-	-	-	-
16	SL%ET	5.2e-10	16	13	7.7e-11	1	0.001	1	0.001	7.7e-05	global-SL%ET	CASSLGETQYF	TCRBV05-01	TCRBJ02-05	NA	03/0910:T1D2_Tscm	1	-	-	-	-	-	-	-	-	-	-	-
16	SL%ET	5.2e-10	16	13	7.7e-11	1	0.001	1	0.001	7.7e-05	global-SL%ET	CASSLGETQYF	TCRBV11-02	TCRBJ02-05	NA	03/0910:T1D2_Tscm	1	-	-	-	-	-	-	-	-	-	-	-
16	SL%ET	5.2e-10	16	13	7.7e-11	1	0.001	1	0.001	7.7e-05	global-SL%ET	CASSLGETQYF	TCRBV28-01	TCRBJ02-05	NA	03/0910:T1D2_Tscm	1	-	-	-	-	-	-	-	-	-	-	-
16	SL%ET	5.2e-10	16	13	7.7e-11	1	0.001	1	0.001	7.7e-05	global-SL%ET	CASSLGETQYF	TCRBV03-01	TCRBJ02-05	NA	03/0910:T1D2_Tscm	1	-	-	-	-	-	-	-	-	-	-	-
16	SL%ET	5.2e-10	16	13	7.7e-11	1	0.001	1	0.001	7.7e-05	global-SL%ET	CASSLGETQYF	TCRBV12-03	TCRBJ02-05	NA	03/0910:T1D2_Tscm	1	-	-	-	-	-	-	-	-	-	-	-
16	SL%ET	5.2e-10	16	13	7.7e-11	1	0.001	1	0.001	7.7e-05	global-SL%ET	CASSLGETQYF	TCRBV07-02	TCRBJ02-05	NA	03/0911:T1D3_Tscm	1	-	-	-	-	-	-	-	-	-	-	-
16	SL%ET	5.2e-10	16	13	7.7e-11	1	0.001	1	0.001	7.7e-05	global-SL%ET	CASSLGETQYF	TCRBV05-01	TCRBJ02-05	NA	03/0911:T1D3_Tscm	1	-	-	-	-	-	-	-	-	-	-	-
16	SL%ET	5.2e-10	16	13	7.7e-11	1	0.001	1	0.001	7.7e-05	global-SL%ET	CASSLGETQYF	TCRBV28-01	TCRBJ02-05	NA	03/0911:T1D3_Tscm	1	-	-	-	-	-	-	-	-	-	-	-
16	SL%ET	5.2e-10	16	13	7.7e-11	1	0.001	1	0.001	7.7e-05	global-SL%ET	CASSLGETQYF	TCRBV11-01	TCRBJ02-05	NA	03/0911:T1D3_Tscm	1	-	-	-	-	-	-	-	-	-	-	-
16	SL%ET	5.2e-10	16	13	7.7e-11	1	0.001	1	0.001	7.7e-05	global-SL%ET	CASSLGETQYF	TCRBV12-03	TCRBJ02-05	NA	03/0911:T1D3_Tscm	1	-	-	-	-	-	-	-	-	-	-	-
16	SL%ET	5.2e-10	16	13	7.7e-11	1	0.001	1	0.001	7.7e-05	global-SL%ET	CASSLGETQYF	TCRBV12-03	TCRBJ02-05	NA	03/0912:T1D4_Tscm	1	-	-	-	-	-	-	-	-	-	-	-
16	SL%ET	5.2e-10	16	13	7.7e-11	1	0.001	1	0.001	7.7e-05	global-SL%ET	CASSLGETQYF	TCRBV11-02	TCRBJ02-05	NA	03/0912:T1D4_Tscm	1	-	-	-	-	-	-	-	-	-	-	-
16	SL%ET	5.2e-10	16	13	7.7e-11	1	0.001	1	0.001	7.7e-05	global-SL%ET	CASSLGETQYF	TCRBV05-01	TCRBJ02-05	NA	03/0912:T1D4_Tscm	1	-	-	-	-	-	-	-	-	-	-	-
16	SL%ET	5.2e-10	16	13	7.7e-11	1	0.001	1	0.001	7.7e-05	global-SL%ET	CASSLGETQYF	TCRBV13-01	TCRBJ02-05	NA	03/0913:T1D5_Tscm	1	-	-	-	-	-	-	-	-	-	-	-
16	SL%ET	5.2e-10	16	13	7.7e-11	1	0.001	1	0.001	7.7e-05	global-SL%ET	CASSLGETQYF	TCRBV07-02	TCRBJ02-05	NA	03/0913:T1D5_Tscm	1	-	-	-	-	-	-	-	-	-	-	-
16	SL%ET	5.2e-10	16	13	7.7e-11	1	0.001	1	0.001	7.7e-05	global-SL%ET	CASSLGETQYF	TCRBV07-06	TCRBJ02-05	NA	03/0913:T1D5_Tscm	1	-	-	-	-	-	-	-	-	-	-	-
16	SL%ET	5.2e-10	16	13	7.7e-11	1	0.001	1	0.001	7.7e-05	global-SL%ET	CASSLGETQYF	TCRBV11-02	TCRBJ02-05	NA	03/0914:T1D6_Tscm	1	-	-	-	-	-	-	-	-	-	-	-
16	SL%ET	5.2e-10	16	13	7.7e-11	1	0.001	1	0.001	7.7e-05	global-SL%ET	CASSLGETQYF	TCRBV11-03	TCRBJ02-05	NA	03/0914:T1D6_Tscm	1	-	-	-	-	-	-	-	-	-	-	-
16	SL%ET	5.2e-10	16	13	7.7e-11	1	0.001	1	0.001	7.7e-05	global-SL%ET	CASSLGETQYF	TCRBV07-02	TCRBJ02-05	NA	03/0914:T1D6_Tscm	1	-	-	-	-	-	-	-	-	-	-	-
16	SL%ET	5.2e-10	16	13	7.7e-11	1	0.001	1	0.001	7.7e-05	global-SL%ET	CASSLGETQYF	TCRBV05-04	TCRBJ02-05	NA	03/0915:T1D7_Tscm	1	-	-	-	-	-	-	-	-	-	-	-
16	SL%ET	5.2e-10	16	13	7.7e-11	1	0.001	1	0.001	7.7e-05	global-SL%ET	CASSLGETQYF	TCRBV11-03	TCRBJ02-05	NA	03/0915:T1D7_Tscm	1	-	-	-	-	-	-	-	-	-	-	-
16	SL%ET	5.2e-10	16	13	7.7e-11	1	0.001	1	0.001	7.7e-05	global-SL%ET	CASSLGETQYF	TCRBV05-01	TCRBJ02-05	NA	03/0915:T1D7_Tscm	1	-	-	-	-	-	-	-	-	-	-	-
16	SL%ET	5.2e-10	16	13	7.7e-11	1	0.001	1	0.001	7.7e-05	global-SL%ET	CASSLGETQYF	TCRBV13-01	TCRBJ02-05	NA	03/0915:T1D7_Tscm	1	-	-	-	-	-	-	-	-	-	-	-
16	SL%ET	5.2e-10	16	13	7.7e-11	1	0.001	1	0.001	7.7e-05	global-SL%ET	CASSLGETQYF	TCRBV12-03	TCRBJ02-05	NA	03/0915:T1D7_Tscm	1	-	-	-	-	-	-	-	-	-	-	-
16	SL%ET	5.2e-10	16	13	7.7e-11	1	0.001	1	0.001	7.7e-05	global-SL%ET	CASSLGETQYF	TCRBV07-09	TCRBJ02-05	NA	03/0915:T1D7_Tscm	1	-	-	-	-	-	-	-	-	-	-	-
16	SL%ET	5.2e-10	16	13	7.7e-11	1	0.001	1	0.001	7.7e-05	global-SL%ET	CASSLGETQYF	TCRBV05-06	TCRBJ02-05	NA	03/0916:T1D8_Tscm	1	-	-	-	-	-	-	-	-	-	-	-
16	SL%ET	5.2e-10	16	13	7.7e-11	1	0.001	1	0.001	7.7e-05	global-SL%ET	CASSLGETQYF	TCRBV05-01	TCRBJ02-05	NA	03/0916:T1D8_Tscm	1	-	-	-	-	-	-	-	-	-	-	-
16	SL%ET	5.2e-10	16	13	7.7e-11	1	0.001	1	0.001	7.7e-05	global-SL%ET	CASSLGETQYF	TCRBV12-03	TCRBJ02-05	NA	03/0916:T1D8_Tscm	1	-	-	-	-	-	-	-	-	-	-	-
16	SL%ET	5.2e-10	16	13	7.7e-11	1	0.001	1	0.001	7.7e-05	global-SL%ET	CASSLTETQYF	TCRBV07-09	TCRBJ02-05	NA	03/0906:HD6_Tscm	1	-	-	-	-	-	-	-	-	-	-	-
16	SL%ET	5.2e-10	16	13	7.7e-11	1	0.001	1	0.001	7.7e-05	global-SL%ET	CASSLTETQYF	TCRBV07-03	TCRBJ02-05	NA	03/0906:HD6_Tscm	1	-	-	-	-	-	-	-	-	-	-	-
16	SL%ET	5.2e-10	16	13	7.7e-11	1	0.001	1	0.001	7.7e-05	global-SL%ET	CASSLTETQYF	TCRBV05-01	TCRBJ02-05	NA	03/0906:HD6_Tscm	1	-	-	-	-	-	-	-	-	-	-	-
16	SL%ET	5.2e-10	16	13	7.7e-11	1	0.001	1	0.001	7.7e-05	global-SL%ET	CASSLTETQYF	TCRBV07-02	TCRBJ02-05	NA	03/0906:HD6_Tscm	1	-	-	-	-	-	-	-	-	-	-	-
16	SL%ET	5.2e-10	16	13	7.7e-11	1	0.001	1	0.001	7.7e-05	global-SL%ET	CASSLEETQYF	TCRBV11-03	TCRBJ02-05	NA	03/0902:HD2_Tscm	1	-	-	-	-	-	-	-	-	-	-	-
16	SL%ET	5.2e-10	16	13	7.7e-11	1	0.001	1	0.001	7.7e-05	global-SL%ET	CASSLEETQYF	TCRBV11-02	TCRBJ02-05	NA	03/0902:HD2_Tscm	1	-	-	-	-	-	-	-	-	-	-	-
16	SL%ET	5.2e-10	16	13	7.7e-11	1	0.001	1	0.001	7.7e-05	global-SL%ET	CASSLEETQYF	TCRBV07-09	TCRBJ02-05	NA	03/0902:HD2_Tscm	1	-	-	-	-	-	-	-	-	-	-	-
16	SL%ET	5.2e-10	16	13	7.7e-11	1	0.001	1	0.001	7.7e-05	global-SL%ET	CASSLEETQYF	TCRBV05-04	TCRBJ02-05	NA	03/0902:HD2_Tscm	1	-	-	-	-	-	-	-	-	-	-	-
16	SL%ET	5.2e-10	16	13	7.7e-11	1	0.001	1	0.001	7.7e-05	global-SL%ET	CASSLEETQYF	TCRBV07-06	TCRBJ02-05	NA	03/0902:HD2_Tscm	1	-	-	-	-	-	-	-	-	-	-	-
16	SL%ET	5.2e-10	16	13	7.7e-11	1	0.001	1	0.001	7.7e-05	global-SL%ET	CASSLEETQYF	TCRBV12-03	TCRBJ02-05	NA	03/0902:HD2_Tscm	1	-	-	-	-	-	-	-	-	-	-	-
16	SL%ET	5.2e-10	16	13	7.7e-11	1	0.001	1	0.001	7.7e-05	global-SL%ET	CASSLEETQYF	TCRBV05-06	TCRBJ02-05	NA	03/0902:HD2_Tscm	1	-	-	-	-	-	-	-	-	-	-	-
16	SL%ET	5.2e-10	16	13	7.7e-11	1	0.001	1	0.001	7.7e-05	global-SL%ET	CASSLEETQYF	TCRBV07-02	TCRBJ02-05	NA	03/0902:HD2_Tscm	1	-	-	-	-	-	-	-	-	-	-	-
16	SL%ET	5.2e-10	16	13	7.7e-11	1	0.001	1	0.001	7.7e-05	global-SL%ET	CASSLEETQYF	TCRBV05-01	TCRBJ02-05	NA	03/0902:HD2_Tscm	1	-	-	-	-	-	-	-	-	-	-	-
16	SL%ET	5.2e-10	16	13	7.7e-11	1	0.001	1	0.001	7.7e-05	global-SL%ET	CASSLEETQYF	TCRBV05-01	TCRBJ02-05	NA	03/0904:HD4_Tscm	1	-	-	-	-	-	-	-	-	-	-	-
16	SL%ET	5.2e-10	16	13	7.7e-11	1	0.001	1	0.001	7.7e-05	global-SL%ET	CASSLEETQYF	TCRBV18-01	TCRBJ02-05	NA	03/0904:HD4_Tscm	1	-	-	-	-	-	-	-	-	-	-	-
16	SL%ET	5.2e-10	16	13	7.7e-11	1	0.001	1	0.001	7.7e-05	global-SL%ET	CASSLEETQYF	TCRBV11-03	TCRBJ02-05	NA	03/0906:HD6_Tscm	1	-	-	-	-	-	-	-	-	-	-	-
16	SL%ET	5.2e-10	16	13	7.7e-11	1	0.001	1	0.001	7.7e-05	global-SL%ET	CASSLEETQYF	TCRBV05-04	TCRBJ02-05	NA	03/0906:HD6_Tscm	1	-	-	-	-	-	-	-	-	-	-	-
16	SL%ET	5.2e-10	16	13	7.7e-11	1	0.001	1	0.001	7.7e-05	global-SL%ET	CASSLEETQYF	TCRBV05-06	TCRBJ02-05	NA	03/0906:HD6_Tscm	1	-	-	-	-	-	-	-	-	-	-	-
16	SL%ET	5.2e-10	16	13	7.7e-11	1	0.001	1	0.001	7.7e-05	global-SL%ET	CASSLEETQYF	TCRBV28-01	TCRBJ02-03	NA	03/0906:HD6_Tscm	1	-	-	-	-	-	-	-	-	-	-	-
16	SL%ET	5.2e-10	16	13	7.7e-11	1	0.001	1	0.001	7.7e-05	global-SL%ET	CASSLEETQYF	TCRBV12-03	TCRBJ02-05	NA	03/0906:HD6_Tscm	1	-	-	-	-	-	-	-	-	-	-	-
16	SL%ET	5.2e-10	16	13	7.7e-11	1	0.001	1	0.001	7.7e-05	global-SL%ET	CASSLEETQYF	TCRBV05-01	TCRBJ02-05	NA	03/0906:HD6_Tscm	1	-	-	-	-	-	-	-	-	-	-	-
16	SL%ET	5.2e-10	16	13	7.7e-11	1	0.001	1	0.001	7.7e-05	global-SL%ET	CASSLEETQYF	TCRBV05-01	TCRBJ02-05	NA	03/0910:T1D2_Tscm	1	-	-	-	-	-	-	-	-	-	-	-
16	SL%ET	5.2e-10	16	13	7.7e-11	1	0.001	1	0.001	7.7e-05	global-SL%ET	CASSLEETQYF	TCRBV18-01	TCRBJ02-05	NA	03/0910:T1D2_Tscm	1	-	-	-	-	-	-	-	-	-	-	-
16	SL%ET	5.2e-10	16	13	7.7e-11	1	0.001	1	0.001	7.7e-05	global-SL%ET	CASSLEETQYF	TCRBV07-02	TCRBJ02-05	NA	03/0910:T1D2_Tscm	1	-	-	-	-	-	-	-	-	-	-	-
16	SL%ET	5.2e-10	16	13	7.7e-11	1	0.001	1	0.001	7.7e-05	global-SL%ET	CASSLEETQYF	TCRBV07-09	TCRBJ02-05	NA	03/0910:T1D2_Tscm	1	-	-	-	-	-	-	-	-	-	-	-
16	SL%ET	5.2e-10	16	13	7.7e-11	1	0.001	1	0.001	7.7e-05	global-SL%ET	CASSLEETQYF	TCRBV07-06	TCRBJ02-05	NA	03/0912:T1D4_Tscm	1	-	-	-	-	-	-	-	-	-	-	-
16	SL%ET	5.2e-10	16	13	7.7e-11	1	0.001	1	0.001	7.7e-05	global-SL%ET	CASSLEETQYF	TCRBV11-02	TCRBJ02-05	NA	03/0912:T1D4_Tscm	1	-	-	-	-	-	-	-	-	-	-	-
16	SL%ET	5.2e-10	16	13	7.7e-11	1	0.001	1	0.001	7.7e-05	global-SL%ET	CASSLEETQYF	TCRBV05-04	TCRBJ02-05	NA	03/0912:T1D4_Tscm	1	-	-	-	-	-	-	-	-	-	-	-
16	SL%ET	5.2e-10	16	13	7.7e-11	1	0.001	1	0.001	7.7e-05	global-SL%ET	CASSLEETQYF	TCRBV05-01	TCRBJ02-05	NA	03/0912:T1D4_Tscm	1	-	-	-	-	-	-	-	-	-	-	-
16	SL%ET	5.2e-10	16	13	7.7e-11	1	0.001	1	0.001	7.7e-05	global-SL%ET	CASSLEETQYF	TCRBV07-09	TCRBJ02-05	NA	03/0912:T1D4_Tscm	1	-	-	-	-	-	-	-	-	-	-	-
16	SL%ET	5.2e-10	16	13	7.7e-11	1	0.001	1	0.001	7.7e-05	global-SL%ET	CASSLEETQYF	TCRBV07-09	TCRBJ02-05	NA	03/0913:T1D5_Tscm	1	-	-	-	-	-	-	-	-	-	-	-
16	SL%ET	5.2e-10	16	13	7.7e-11	1	0.001	1	0.001	7.7e-05	global-SL%ET	CASSLEETQYF	TCRBV02-01	TCRBJ02-05	NA	03/0913:T1D5_Tscm	1	-	-	-	-	-	-	-	-	-	-	-
16	SL%ET	5.2e-10	16	13	7.7e-11	1	0.001	1	0.001	7.7e-05	global-SL%ET	CASSLEETQYF	TCRBV05-06	TCRBJ02-05	NA	03/0913:T1D5_Tscm	1	-	-	-	-	-	-	-	-	-	-	-
16	SL%ET	5.2e-10	16	13	7.7e-11	1	0.001	1	0.001	7.7e-05	global-SL%ET	CASSLEETQYF	TCRBV18-01	TCRBJ02-05	NA	03/0913:T1D5_Tscm	1	-	-	-	-	-	-	-	-	-	-	-
16	SL%ET	5.2e-10	16	13	7.7e-11	1	0.001	1	0.001	7.7e-05	global-SL%ET	CASSLEETQYF	TCRBV05-01	TCRBJ02-05	NA	03/0914:T1D6_Tscm	1	-	-	-	-	-	-	-	-	-	-	-
16	SL%ET	5.2e-10	16	13	7.7e-11	1	0.001	1	0.001	7.7e-05	global-SL%ET	CASSLEETQYF	TCRBV06-06	TCRBJ02-05	NA	03/0915:T1D7_Tscm	1	-	-	-	-	-	-	-	-	-	-	-
16	SL%ET	5.2e-10	16	13	7.7e-11	1	0.001	1	0.001	7.7e-05	global-SL%ET	CASSLEETQYF	TCRBV05-04	TCRBJ02-05	NA	03/0915:T1D7_Tscm	1	-	-	-	-	-	-	-	-	-	-	-
16	SL%ET	5.2e-10	16	13	7.7e-11	1	0.001	1	0.001	7.7e-05	global-SL%ET	CASSLEETQYF	TCRBV05-01	TCRBJ02-05	NA	03/0915:T1D7_Tscm	1	-	-	-	-	-	-	-	-	-	-	-
16	SL%ET	5.2e-10	16	13	7.7e-11	1	0.001	1	0.001	7.7e-05	global-SL%ET	CASSLEETQYF	TCRBV05-06	TCRBJ02-05	NA	03/0915:T1D7_Tscm	1	-	-	-	-	-	-	-	-	-	-	-
16	SL%ET	5.2e-10	16	13	7.7e-11	1	0.001	1	0.001	7.7e-05	global-SL%ET	CASSLEETQYF	TCRBV11-02	TCRBJ02-05	NA	03/0916:T1D8_Tscm	1	-	-	-	-	-	-	-	-	-	-	-
16	SL%ET	5.2e-10	16	13	7.7e-11	1	0.001	1	0.001	7.7e-05	global-SL%ET	CASSLEETQYF	TCRBV05-01	TCRBJ02-05	NA	03/0916:T1D8_Tscm	1	-	-	-	-	-	-	-	-	-	-	-
16	SL%ET	5.2e-10	16	13	7.7e-11	1	0.001	1	0.001	7.7e-05	global-SL%ET	CASSLRETQYF	TCRBV07-08	TCRBJ02-05	NA	03/0902:HD2_Tscm	1	-	-	-	-	-	-	-	-	-	-	-
16	SL%ET	5.2e-10	16	13	7.7e-11	1	0.001	1	0.001	7.7e-05	global-SL%ET	CASSLRETQYF	TCRBV05-04	TCRBJ02-05	NA	03/0902:HD2_Tscm	1	-	-	-	-	-	-	-	-	-	-	-
16	SL%ET	5.2e-10	16	13	7.7e-11	1	0.001	1	0.001	7.7e-05	global-SL%ET	CASSLRETQYF	TCRBV05-01	TCRBJ02-05	NA	03/0902:HD2_Tscm	1	-	-	-	-	-	-	-	-	-	-	-
16	SL%ET	5.2e-10	16	13	7.7e-11	1	0.001	1	0.001	7.7e-05	global-SL%ET	CASSLRETQYF	TCRBV28-01	TCRBJ02-05	NA	03/0902:HD2_Tscm	1	-	-	-	-	-	-	-	-	-	-	-
16	SL%ET	5.2e-10	16	13	7.7e-11	1	0.001	1	0.001	7.7e-05	global-SL%ET	CASSLRETQYF	TCRBV07-02	TCRBJ02-05	NA	03/0902:HD2_Tscm	1	-	-	-	-	-	-	-	-	-	-	-
16	SL%ET	5.2e-10	16	13	7.7e-11	1	0.001	1	0.001	7.7e-05	global-SL%ET	CASSLRETQYF	TCRBV12-03	TCRBJ02-05	NA	03/0902:HD2_Tscm	1	-	-	-	-	-	-	-	-	-	-	-
16	SL%ET	5.2e-10	16	13	7.7e-11	1	0.001	1	0.001	7.7e-05	global-SL%ET	CASSLRETQYF	TCRBV03-01	TCRBJ02-05	NA	03/0906:HD6_Tscm	1	-	-	-	-	-	-	-	-	-	-	-
16	SL%ET	5.2e-10	16	13	7.7e-11	1	0.001	1	0.001	7.7e-05	global-SL%ET	CASSLRETQYF	TCRBV18-01	TCRBJ02-05	NA	03/0906:HD6_Tscm	1	-	-	-	-	-	-	-	-	-	-	-
16	SL%ET	5.2e-10	16	13	7.7e-11	1	0.001	1	0.001	7.7e-05	global-SL%ET	CASSLRETQYF	TCRBV25-01	TCRBJ02-05	NA	03/0906:HD6_Tscm	1	-	-	-	-	-	-	-	-	-	-	-
16	SL%ET	5.2e-10	16	13	7.7e-11	1	0.001	1	0.001	7.7e-05	global-SL%ET	CASSLRETQYF	TCRBV28-01	TCRBJ02-05	NA	03/0906:HD6_Tscm	1	-	-	-	-	-	-	-	-	-	-	-
16	SL%ET	5.2e-10	16	13	7.7e-11	1	0.001	1	0.001	7.7e-05	global-SL%ET	CASSLRETQYF	TCRBV27-01	TCRBJ02-05	NA	03/0906:HD6_Tscm	1	-	-	-	-	-	-	-	-	-	-	-
16	SL%ET	5.2e-10	16	13	7.7e-11	1	0.001	1	0.001	7.7e-05	global-SL%ET	CASSLRETQYF	TCRBV07-06	TCRBJ02-05	NA	03/0906:HD6_Tscm	1	-	-	-	-	-	-	-	-	-	-	-
16	SL%ET	5.2e-10	16	13	7.7e-11	1	0.001	1	0.001	7.7e-05	global-SL%ET	CASSLRETQYF	TCRBV12-03	TCRBJ02-05	NA	03/0906:HD6_Tscm	1	-	-	-	-	-	-	-	-	-	-	-
16	SL%ET	5.2e-10	16	13	7.7e-11	1	0.001	1	0.001	7.7e-05	global-SL%ET	CASSLRETQYF	TCRBV05-01	TCRBJ02-05	NA	03/0906:HD6_Tscm	1	-	-	-	-	-	-	-	-	-	-	-
16	SL%ET	5.2e-10	16	13	7.7e-11	1	0.001	1	0.001	7.7e-05	global-SL%ET	CASSLRETQYF	TCRBV07-09	TCRBJ02-05	NA	03/0906:HD6_Tscm	1	-	-	-	-	-	-	-	-	-	-	-
16	SL%ET	5.2e-10	16	13	7.7e-11	1	0.001	1	0.001	7.7e-05	global-SL%ET	CASSLRETQYF	TCRBV13-01	TCRBJ02-05	NA	03/0907:HD7_Tscm	1	-	-	-	-	-	-	-	-	-	-	-
16	SL%ET	5.2e-10	16	13	7.7e-11	1	0.001	1	0.001	7.7e-05	global-SL%ET	CASSLRETQYF	TCRBV07-03	TCRBJ02-05	NA	03/0907:HD7_Tscm	1	-	-	-	-	-	-	-	-	-	-	-
16	SL%ET	5.2e-10	16	13	7.7e-11	1	0.001	1	0.001	7.7e-05	global-SL%ET	CASSLRETQYF	TCRBV11-02	TCRBJ02-05	NA	03/0907:HD7_Tscm	1	-	-	-	-	-	-	-	-	-	-	-
16	SL%ET	5.2e-10	16	13	7.7e-11	1	0.001	1	0.001	7.7e-05	global-SL%ET	CASSLRETQYF	TCRBV05-01	TCRBJ02-05	NA	03/0907:HD7_Tscm	1	-	-	-	-	-	-	-	-	-	-	-
16	SL%ET	5.2e-10	16	13	7.7e-11	1	0.001	1	0.001	7.7e-05	global-SL%ET	CASSLRETQYF	TCRBV05-06	TCRBJ02-05	NA	03/0907:HD7_Tscm	1	-	-	-	-	-	-	-	-	-	-	-
16	SL%ET	5.2e-10	16	13	7.7e-11	1	0.001	1	0.001	7.7e-05	global-SL%ET	CASSLRETQYF	TCRBV07-02	TCRBJ02-05	NA	03/0907:HD7_Tscm	1	-	-	-	-	-	-	-	-	-	-	-
16	SL%ET	5.2e-10	16	13	7.7e-11	1	0.001	1	0.001	7.7e-05	global-SL%ET	CASSLRETQYF	TCRBV28-01	TCRBJ02-05	NA	03/0907:HD7_Tscm	1	-	-	-	-	-	-	-	-	-	-	-
16	SL%ET	5.2e-10	16	13	7.7e-11	1	0.001	1	0.001	7.7e-05	global-SL%ET	CASSLRETQYF	TCRBV07-02	TCRBJ02-05	NA	03/0908:HD8_Tscm	1	-	-	-	-	-	-	-	-	-	-	-
16	SL%ET	5.2e-10	16	13	7.7e-11	1	0.001	1	0.001	7.7e-05	global-SL%ET	CASSLRETQYF	TCRBV05-05	TCRBJ02-03	NA	03/0908:HD8_Tscm	1	-	-	-	-	-	-	-	-	-	-	-
16	SL%ET	5.2e-10	16	13	7.7e-11	1	0.001	1	0.001	7.7e-05	global-SL%ET	CASSLRETQYF	TCRBV05-06	TCRBJ02-05	NA	03/0908:HD8_Tscm	1	-	-	-	-	-	-	-	-	-	-	-
16	SL%ET	5.2e-10	16	13	7.7e-11	1	0.001	1	0.001	7.7e-05	global-SL%ET	CASSLRETQYF	TCRBV05-04	TCRBJ02-05	NA	03/0908:HD8_Tscm	1	-	-	-	-	-	-	-	-	-	-	-
16	SL%ET	5.2e-10	16	13	7.7e-11	1	0.001	1	0.001	7.7e-05	global-SL%ET	CASSLRETQYF	TCRBV07-02	TCRBJ02-05	NA	03/0910:T1D2_Tscm	1	-	-	-	-	-	-	-	-	-	-	-
16	SL%ET	5.2e-10	16	13	7.7e-11	1	0.001	1	0.001	7.7e-05	global-SL%ET	CASSLRETQYF	TCRBV28-01	TCRBJ02-05	NA	03/0910:T1D2_Tscm	1	-	-	-	-	-	-	-	-	-	-	-
16	SL%ET	5.2e-10	16	13	7.7e-11	1	0.001	1	0.001	7.7e-05	global-SL%ET	CASSLRETQYF	TCRBV05-06	TCRBJ02-05	NA	03/0910:T1D2_Tscm	1	-	-	-	-	-	-	-	-	-	-	-
16	SL%ET	5.2e-10	16	13	7.7e-11	1	0.001	1	0.001	7.7e-05	global-SL%ET	CASSLRETQYF	TCRBV05-01	TCRBJ02-05	NA	03/0910:T1D2_Tscm	1	-	-	-	-	-	-	-	-	-	-	-
[truncated: 16,393 more rows]
