# Supplementary material for: Characteristics of T-cell receptor repertoire of stem cell-like memory CD4+ T cells
Source: PeerJ journal article supplement (doi:10.7717/peerj.11987), 2021-08-25

**A**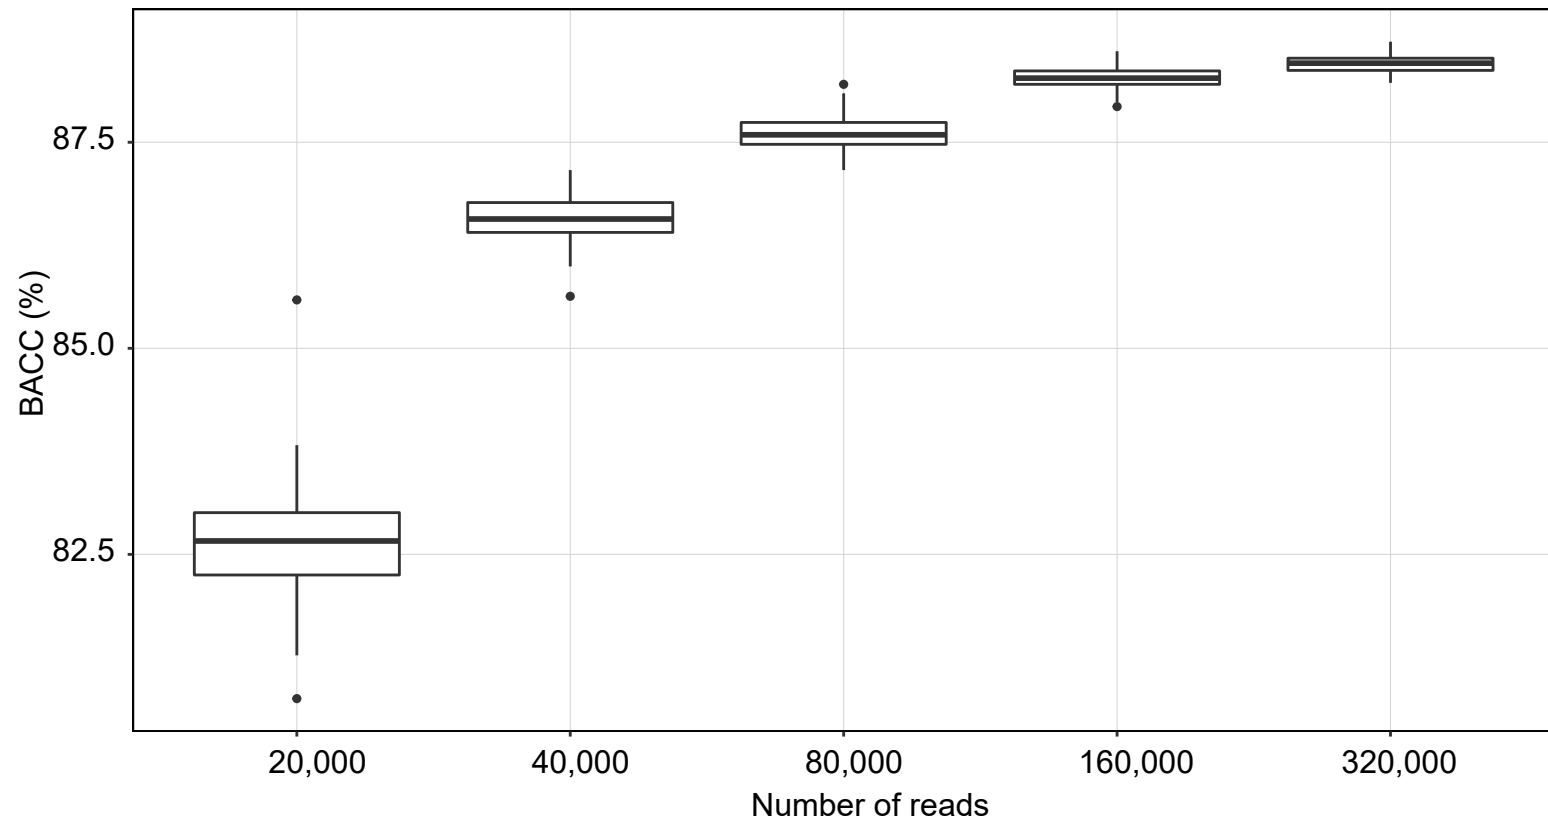**B**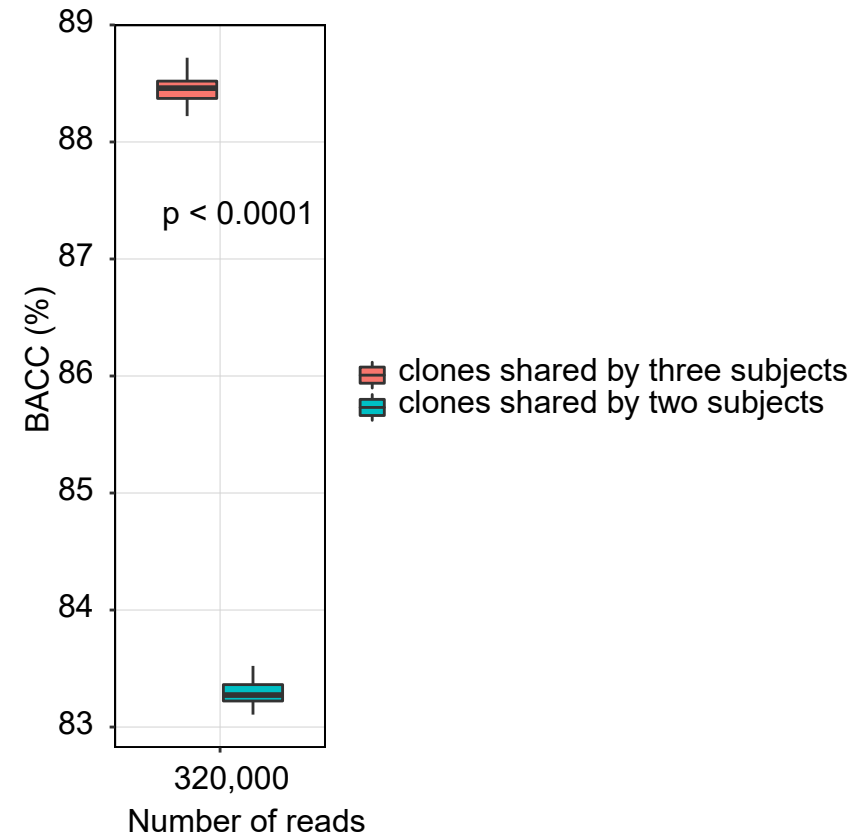

Supplement: Supplementary_Figure_2.pdf [file Supplementary_Figure_2.pdf]
